# Supplementary material
Source: PubMed Central journal article supplement (PMC3163944)
Supplement: JCI43428sd.pdf [file JCI43428sd.pdf]

## Supplemental data - Content

### Supplemental figures

- Figure 1** Western blot analysis of MYST4.
- Figure 2** Expression pattern of *MYST4* isoforms.
- Figure 3** Differentially expressed genes of HEK293/HeLa *Myst4* siRNA vs. controls.
- Figure 4** Summary of gene expression pattern and gene ontology (GO) of significant differentially expressed genes (p-value < 0.05).
- Figure 5** Results of the *MYST4* CHIP-CHIP analysis of HEK293/HeLa cell lines.
- Figure 6** Biochemical characterization of MEK, ERK and AKT phosphorylation levels.

### Supplemental tables

- Table 1** Results of the ANOVA calculation (p < 0.05; FC < -1.5 or > 1.5) of HEK 293 *MYST4* siRNA and HeLa *MYST4* siRNA vs HEK 293 ctrl and HeLa ctrl
- Table 2** Results of the ANOVA calculation of Mouse *Qkf<sup>gt/gt</sup>* adult dorsal cortex vs. wildtype (p < 0.05; FC < -1.5 or > 1.5)
- Table 3** Results of the ANOVA calculation of Mouse *Qkf<sup>gt/gt</sup>* E12.5 dorsal telencephalon vs wildtype
- Table 4** Tissue expression pattern of significantly enriched genes (HEK 293 *MYST4* siRNA and HeLa *MYST4* siRNA vs HEK 293 ctrl and HeLa ctrl [p < 0.05; FC < -1.5 or > 1.5])
- Table 5** GO intracellular component categories of significantly enriched genes (HEK 293 *MYST4* siRNA and HeLa *MYST4* siRNA vs HEK 293 ctrl and HeLa ctrl [p < 0.05; FC < -1.5 or > 1.5])
- Table 6** GO molecular funktion categories of significantly enriched genes (HEK 293 *MYST4* siRNA and HeLa *MYST4* siRNA vs HEK 293 ctrl and HeLa ctrl [p < 0.05; FC < -1.5 or > 1.5])
- Table 7** GO intracellular component categories of differentially expressed genes (Mouse *Qkf<sup>gt/gt</sup>* adult dorsal cortex vs. wildtype [FC < -1.5 or > 1.5])

- Table 8** GO molecular funktion catagories of significantly enriched genes (Mouse  $Qkf^{gt/gt}$  adult dorsal cortex vs. wildtype [ $p < 0.05$ ;  $FC < -1.5$  or  $> 1.5$ ])
- Table 9** GO intracellular component catagories of differentially expressed genes (Mouse  $Qkfgt/gt$  E12.5 dorsal telencephalon vs wildtype [ $FC < -1.5$  or  $> 1.5$ ])
- Table 10** GO molecular funktion catagories of significantly enriched genes (Mouse  $Qkfgt/gt$  E12.5 dorsal telencephalon vs wildtype [ $FC < -1.5$  or  $> 1.5$ ])
- Table 11** KEGG pathways of significantly enriched genes (HEK 293 *MYST4* siRNA and HeLa *MYST4* siRNA vs HEK 293 ctrl and HeLa ctrl [ $p < 0.05$ ;  $FC < -1.5$  or  $> 1.5$ ]) Pathway Express calculation
- Table 12** KEGG pathways of significantly enriched genes (HEK 293 *MYST4* siRNA and HeLa *MYST4* siRNA vs HEK 293 ctrl and HeLa ctrl [ $p < 0.05$ ;  $FC < -1.5$  or  $> 1.5$ ]) DAVID functional annotation
- Table 13** KEGG pathways of significantly enriched genes (Mouse  $Qkf^{gt/gt}$  adult dorsal cortex vs. wildtype [ $p < 0.05$ ;  $FC < -1.5$  or  $> 1.5$ ]) Pathway Express calculation
- Table 14** KEGG pathways of significantly enriched genes (Mouse  $Qkf^{gt/gt}$  adult dorsal cortex vs. wildtype [ $p < 0.05$ ;  $FC < -1.5$  or  $> 1.5$ ]) DAVID functional annotation calculation
- Table 15** KEGG pathways of significantly enriched genes (Mouse  $Qkf^{gt/gt}$  E12.5 dorsal telencephalon vs wildtype [ $p < 0.05$ ;  $FC < -1.5$  or  $> 1.5$ ]) Pathway Express calculation
- Table 16** KEGG pathways of significantly enriched genes (Mouse  $Qkf^{gt/gt}$  E12.5 dorsal telencephalon vs wildtype [ $p < 0.05$ ;  $FC < -1.5$  or  $> 1.5$ ]) DAVID functional annotation
- Table 17** Chromatin immunoprecipitation statistics
- Table 18** KEGG pathways of enriched genes with CHIP-on-CHIP bindings sites (Pathway Express calculation)
- Table 19** KEGG pathways of enriched genes with CHIP-on-CHIP bindings sites (DAVID functional annotation)

- Table 20** Genes with significant ChIP-on-CHIP bindings sites (MAT score p-value < 0.05) and significant siRNA expression values (p-value < 0.05)
- Table 21** KEGG pathways of significant differentially expressed genes (p-value < 0.05) with ChIP-on-CHIP binding sites (MAT score p-value < 0.05) (DAVID functional annotation)
- Table 22** KEGG pathways of significant differentially expressed genes (p-value < 0.05) with ChIP-on-CHIP binding sites (MAT score p-value < 0.05) (Pathway Express calculation)
- Table 23** Genes with ChIP-on-CHIP bindings sites (\* region p-value < 0.05) and siRNA expression values of the KEGG MAPK signaling pathway
- Table 24** Quantitative real-time PCR validation of genes with ChIP-on-CHIP bindings sites (region p-value < 0.05) and significant HEK & HeLA siRNA expression values and additional expression of patient versus 4 control lymphoblastoid cell lines values of the KEGG MAPK signaling pathway.
- Table 25** Tissue expression pattern of significantly enriched genes (p-value < 0.05) with ChIP-on-CHIP binding sites (MAT score p-value < 0.05)

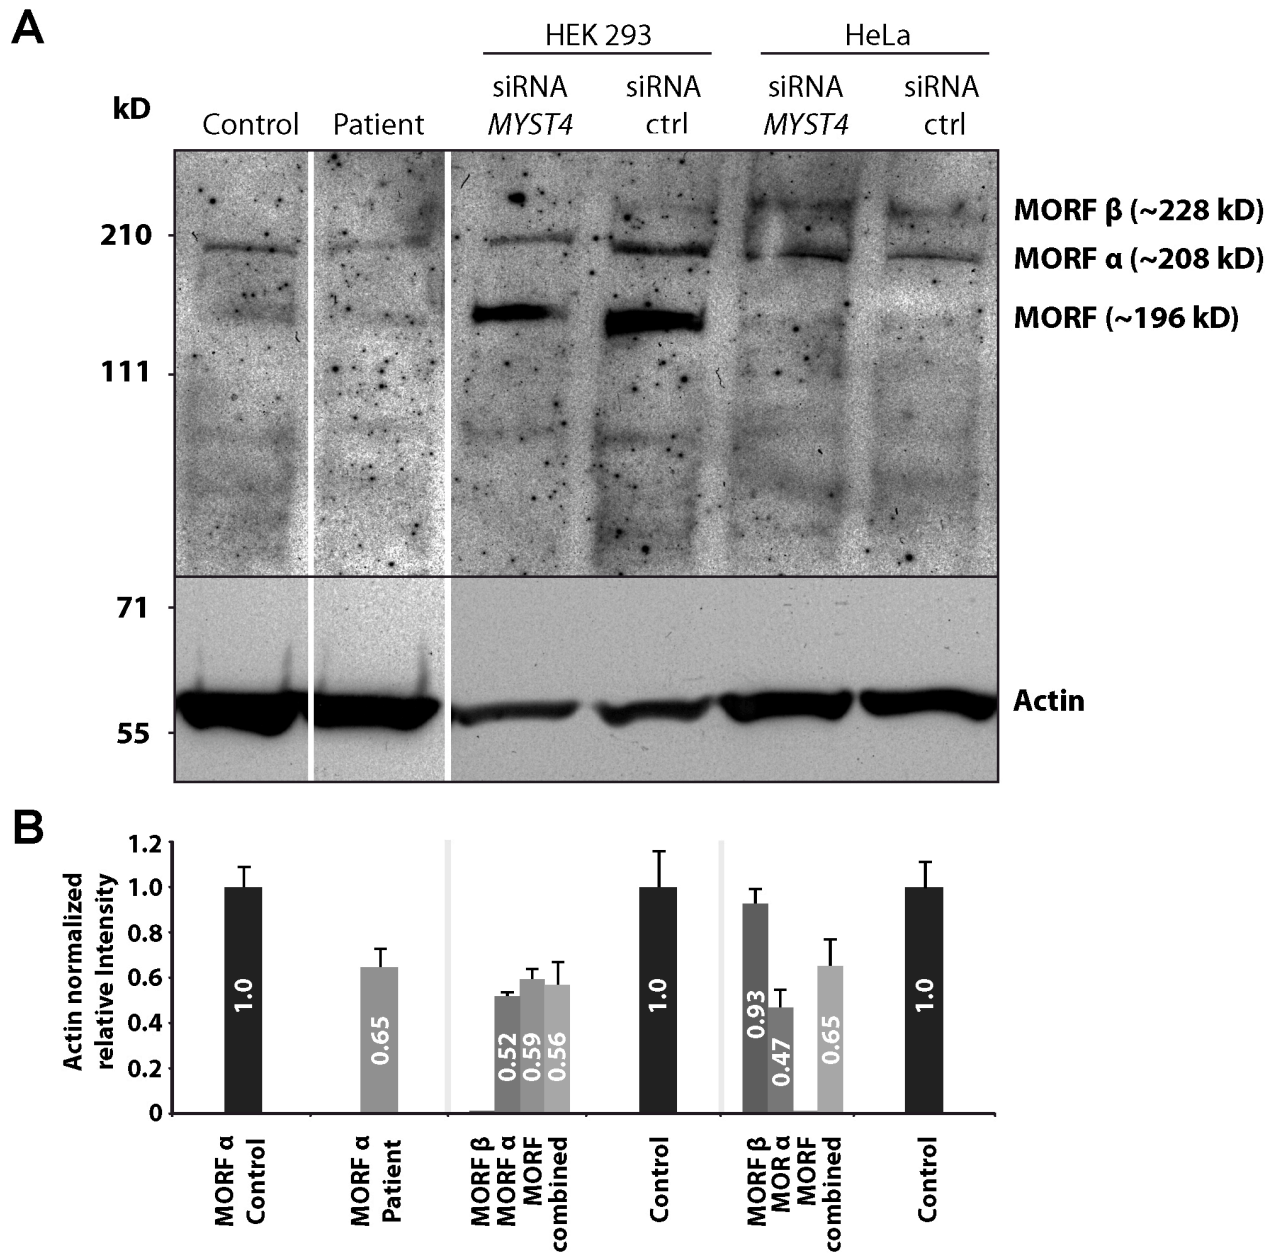

**Supplemental Figure 1** Western blot analysis of MYST4. **(A)** Lymphoblastoid cell lines of the patient and a normal control in the first 2 lanes presenting mainly the MORF  $\alpha$  isoform. Note the reduced protein band and the absence of a detectable fusionprotein. HEK 293 and HeLa cell lines after MYST4 specific siRNA and scrambled siRNA. Note the different pattern of MYST4 isoforms (MORF  $\beta$ , MORF  $\alpha$ , and MORF). The lanes were run on the same gel but were contiguous. **(B)** Quantification of MYST4 isoforms normalized to the respective actin band. Note the significantly reduced protein levels in the patient, and after siRNA in HEK 293 and HeLa cell lines.



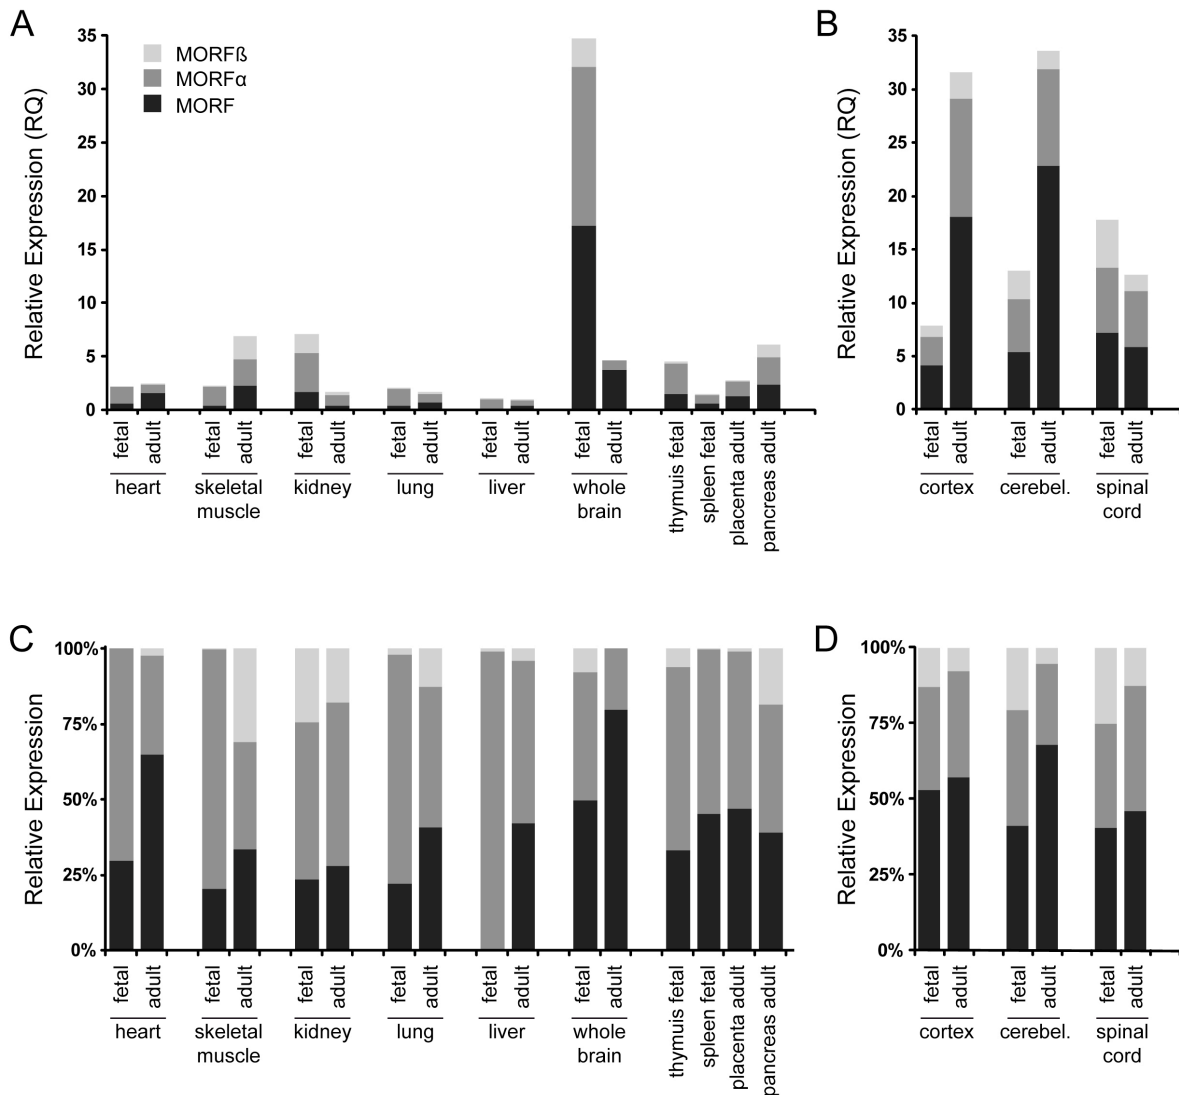

**Supplemental Figure 2** Expression pattern of *MYST4* isoforms. (A, B) Relative expression levels of *MYST4* of all three isoforms. Note the highest expression levels in the fetal brain. Whereas in skeletal muscle expression levels increases up to 7fold from fetal to adult, whole brain expression levels decrease more than 7fold in adult brain. (C, D) The percentage of relative isoform expression is shown in relation to overall expression.

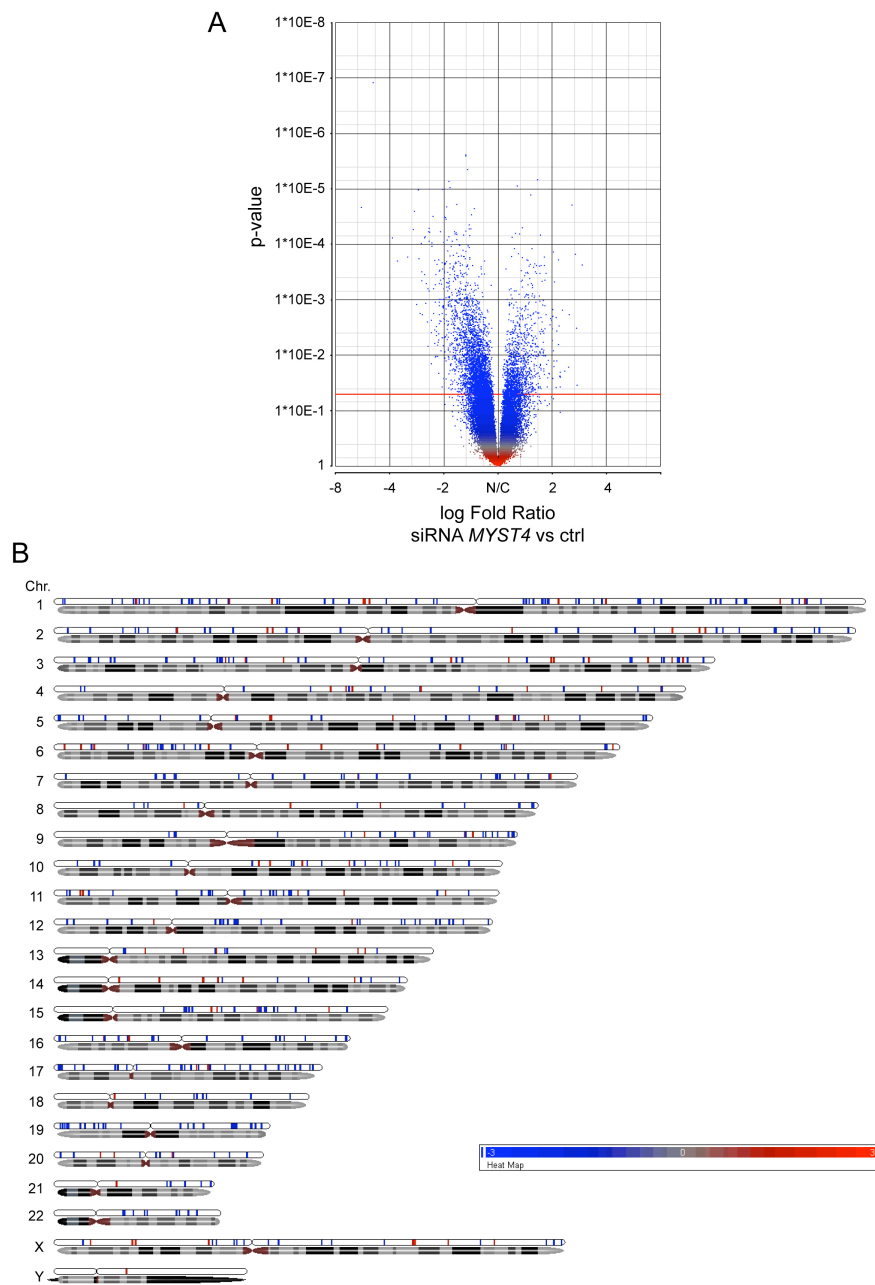

**Supplemental Figure 3** Differentially expressed genes of HEK293/HeLa *Myst4* siRNA vs. controls. **(A)** Volcano plot of differentially expressed genes. Each dot represents one gene. Note the red line marking p-value of 0.05. **(B)** Heat map and chromosomal location of significant differentially expressed genes (p-value < 0.05) with a fold change < - 1.5 oder > 1.5. Note significant higher count of downregulated genes.

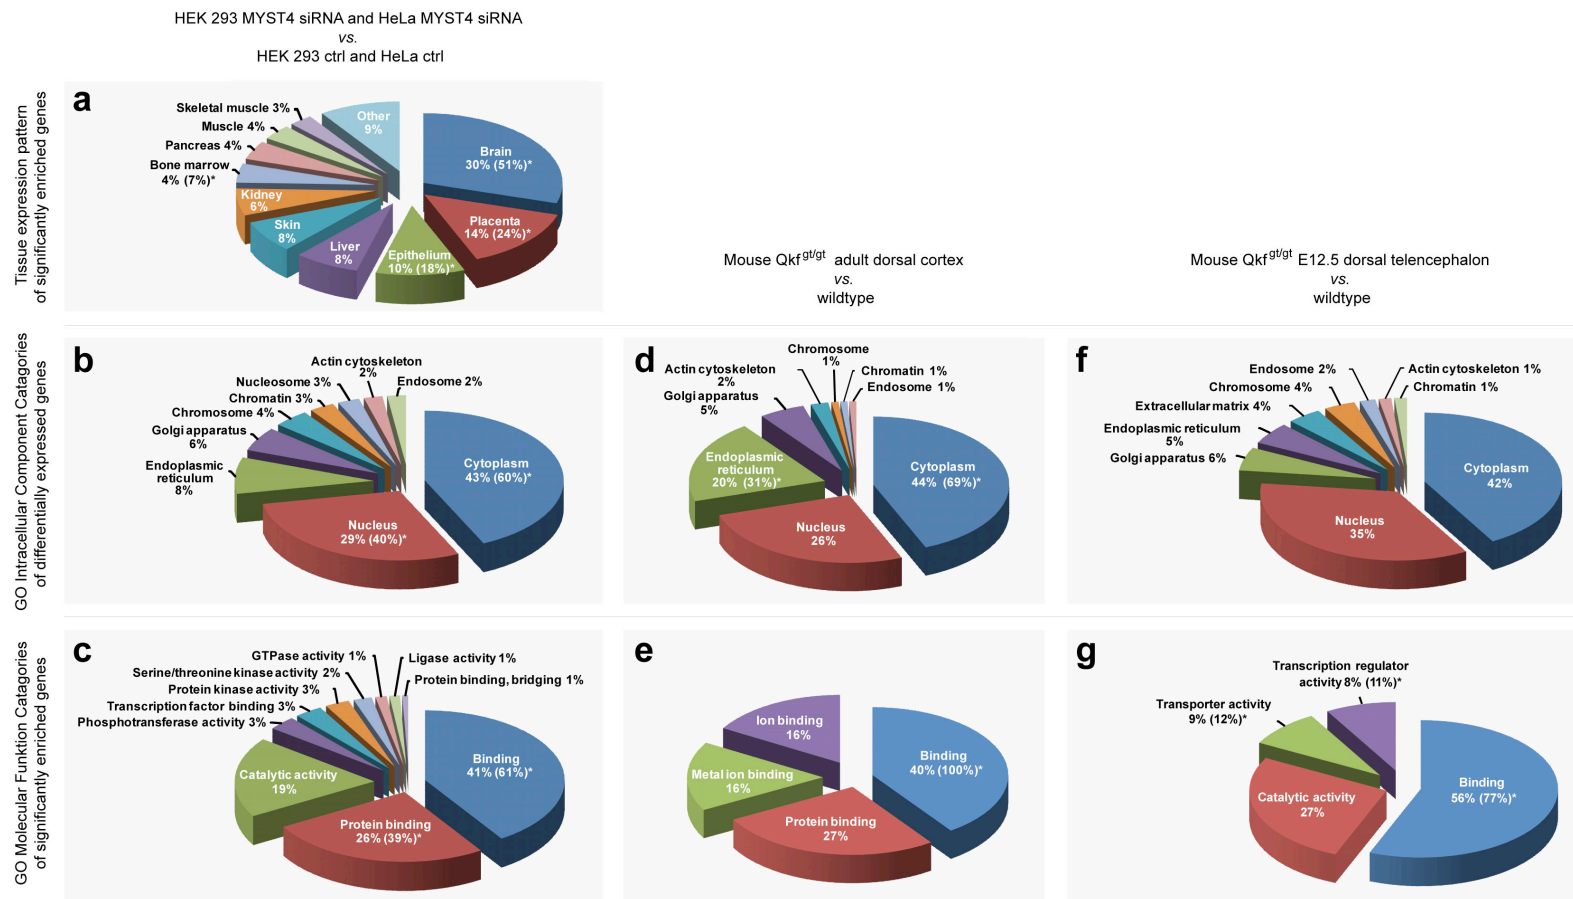

**Supplemental Figure 4** Summary of gene expression pattern and gene ontology (GO) of significant differentially expressed genes ( $p$ -value  $< 0.05$ ). Tissue expression pattern and GO of intracellular component categories and molecular function categories of **(A-C)** HEK293/HeLa *MYST4* siRNA vs. controls, **(D, E)** mouse  $QKf^{gt/gt}$  adult dorsal cortex and **(F, G)** mouse  $QKf^{gt/gt}$  E12.5 dorsal telencephalon vs. controls. Note similar main categories for intracellular component and molecular function categories.

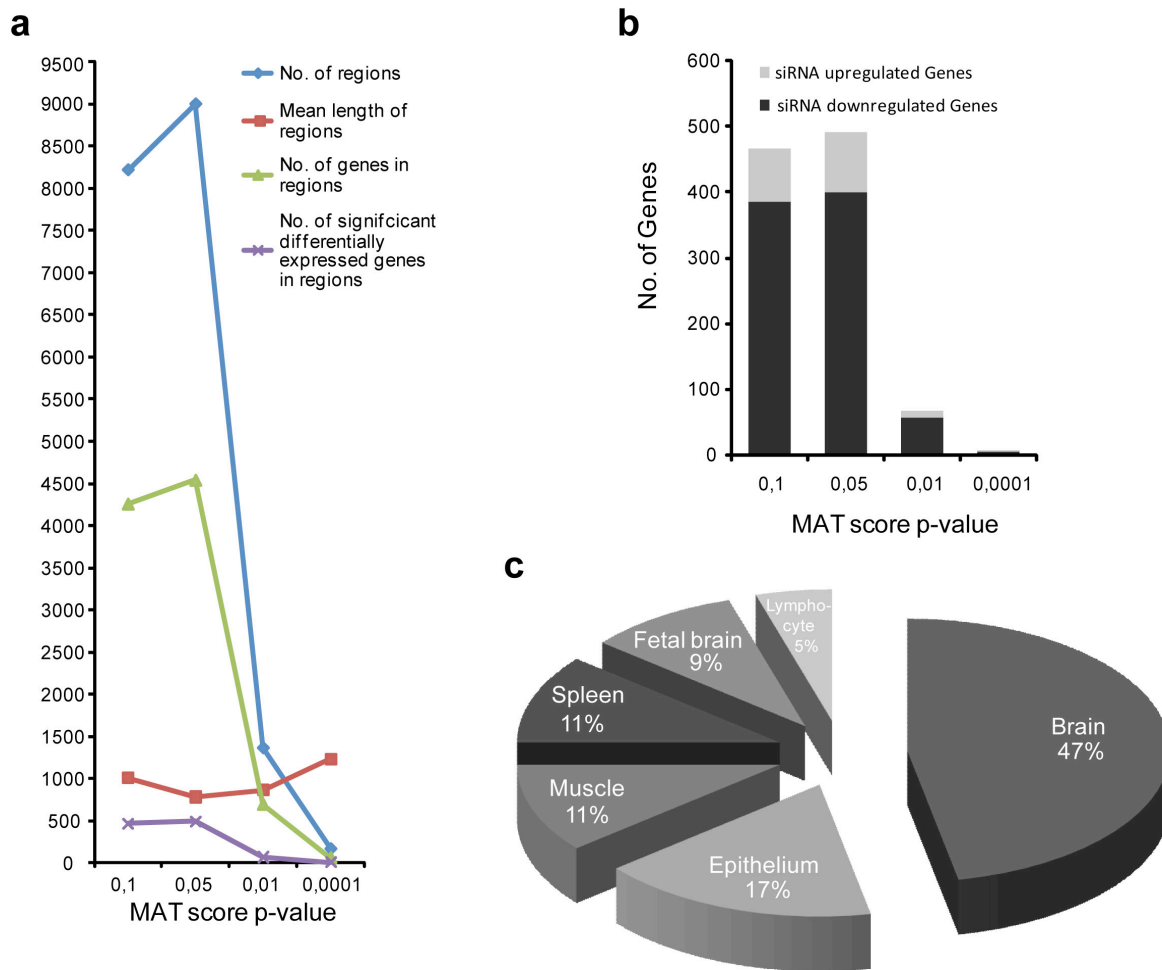

**Supplemental Figure 5** Results of the *MYST4* ChIP-CHIP analysis of HEK293/HeLa cell lines. **(A)** Length of the regions and number of genes identified by the MAT algorithm. Whereas the mean length of the regions is independent from the cut-off MAT score p-value, the number of genes rapidly decreases with higher significance. **(B)** The ratio of down- to up-regulated genes remains between 4:1 to 5:1 indicating transcriptional activation of genes by *MYST4*. **(C)** Tissue expression pattern (DAVID functional annotation of Uniprot tissues) of significantly enriched genes with CHIP binding sites-on-ChIP (MAT score p-value < 0.05) confirms importance of *MYST4* regulation in brain development and function and muscle matching the phenotype in human and mouse.

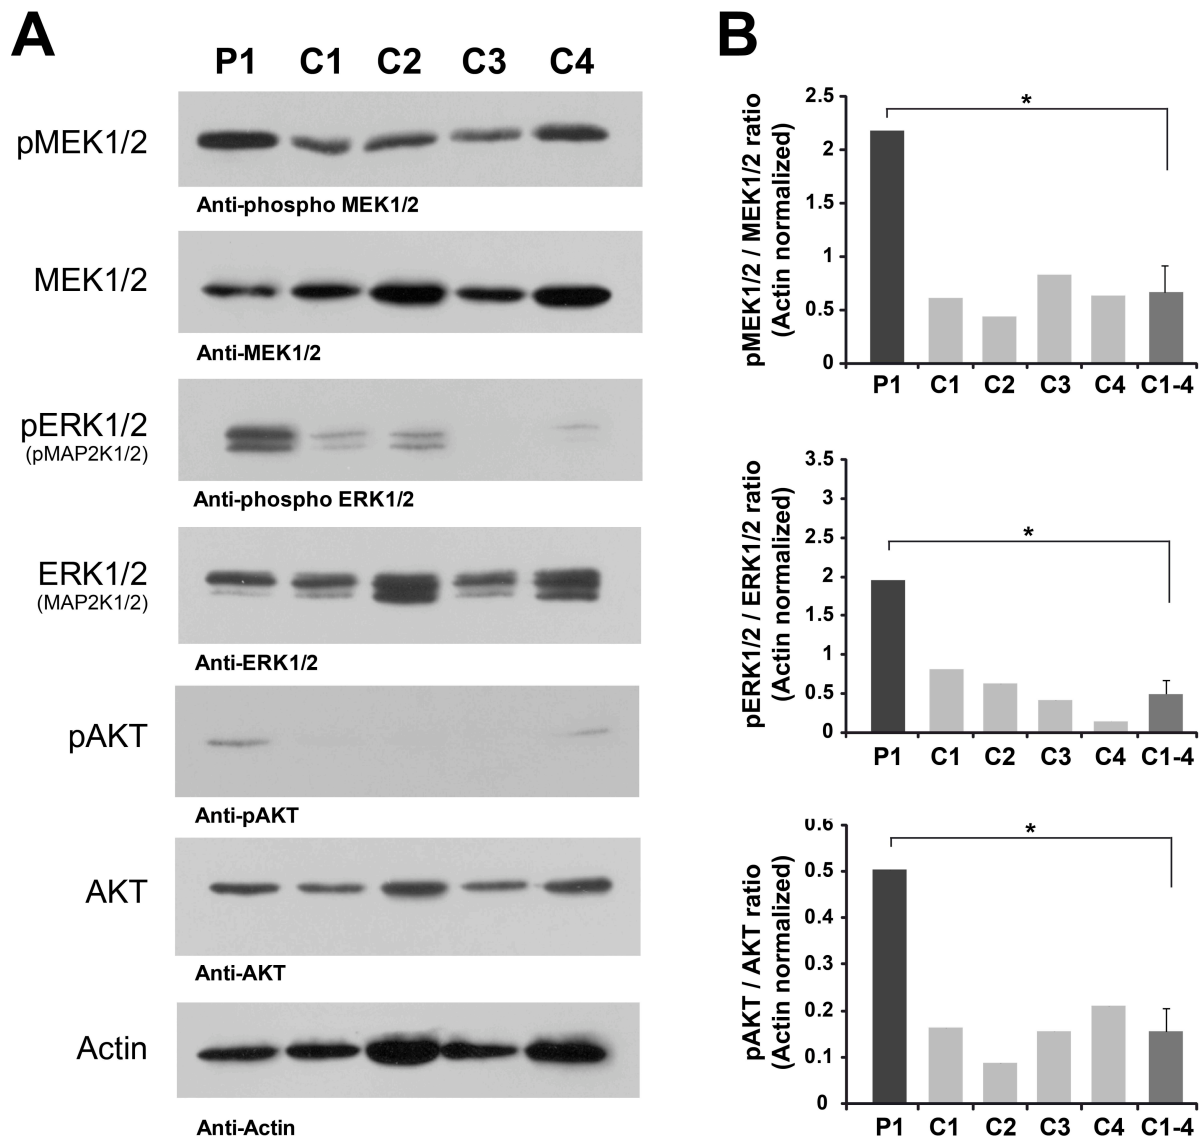

**Supplemental Figure 6** Biochemical characterization of MEK, ERK and AKT phosphorylation levels. **(A)** Increased MAPK signalling activity of the patient (P1) containing the MYST4 mutation compared to 4 control samples (C1-4). Cells were analyzed for the phosphorylation level of MEK/pMEK1/2 (MAP2K/pMAP2K1/2), ERK/pERK1/2 and AKT/pAKT. Total amounts of MEK, ERK and AKT and actin in cell lysates are shown and the specificity of the antibody is specified below each panel. **(B)** After normalization to Actin densitometric analysis confirmed significant increased ratios of all three measured parameters (\* t test  $p < 0.05$ ).

## Supplemental Tables

**Table 1** Results of the ANOVA calculation ( $p < 0.05$ ;  $FC < -1.5$  or  $> 1.5$ ) of HEK 293

*MYST4* siRNA and HeLa *MYST4* siRNA vs HEK 293 ctrl and HeLa ctrl

| Gene Symbol | Gene Title                                                                       | Entrez Gene | Probeset ID  | FDR-adjusted p-value | Ratio | Fold-Change |
|-------------|----------------------------------------------------------------------------------|-------------|--------------|----------------------|-------|-------------|
| ARL5A       | ADP-ribosylation factor-like 5A                                                  | 26225       | 226617_at    | 2.16E-05             | 0.17  | -5.75       |
| ARL5A       | ADP-ribosylation factor-like 5A                                                  | 26225       | 218150_at    | 7.58E-05             | 0.26  | -3.87       |
| ---         | Transcribed locus                                                                | ---         | 238431_at    | 2.00E-04             | 0.28  | -3.62       |
| ---         | Primary neuroblastoma cDNA, clone:Nbla11485                                      | ---         | 226520_at    | 1.70E-04             | 0.32  | -3.17       |
| SLC35D1     | solute carrier family 35 (UDP-glucuronic acid/UDP-N-acetylgalactosamine dual tra | 23169       | 209712_at    | 5.37E-05             | 0.34  | -2.96       |
| ---         | CDNA FLJ30090 fis, clone BNGH41000015                                            | ---         | 243176_at    | 2.52E-05             | 0.34  | -2.91       |
| MXD1        | MAX dimerization protein 1                                                       | 4084        | 226275_at    | 1.21E-03             | 0.35  | -2.82       |
| LCOR        | ligand dependent nuclear receptor corepressor                                    | 84458       | 228454_at    | 1.81E-04             | 0.36  | -2.74       |
| CASP6       | caspace 6, apoptosis-related cysteine peptidase                                  | 839         | 209790_s_at  | 1.75E-03             | 0.37  | -2.71       |
| SLC35D1     | solute carrier family 35 (UDP-glucuronic acid/UDP-N-acetylgalactosamine dual tra | 23169       | 209711_at    | 9.70E-05             | 0.38  | -2.67       |
| CDK6        | cyclin-dependent kinase 6                                                        | 1021        | 224851_at    | 4.51E-04             | 0.38  | -2.65       |
| CDK6        | cyclin-dependent kinase 6                                                        | 1021        | 224847_at    | 3.11E-04             | 0.38  | -2.65       |
| DNAJC6      | DnaJ (Hsp40) homolog, subfamily C, member 6                                      | 9829        | 204720_s_at  | 1.84E-03             | 0.38  | -2.63       |
| ---         | CDNA FLJ30652 fis, clone DFNES2000011                                            | ---         | 224811_at    | 7.60E-05             | 0.39  | -2.56       |
| CDS2        | CDP-diacylglycerol synthase (phosphatidate cytidyltransferase) 2                 | 8760        | 212864_at    | 3.52E-04             | 0.39  | -2.56       |
| ---         | CDNA clone IMAGE:4819084                                                         | ---         | 235456_at    | 7.26E-05             | 0.39  | -2.53       |
| SWAP70      | SWAP-70 protein                                                                  | 23075       | 209307_at    | 1.17E-03             | 0.40  | -2.52       |
| CDK6        | cyclin-dependent kinase 6                                                        | 1021        | 224848_at    | 5.05E-04             | 0.40  | -2.51       |
| ---         | Transcribed locus                                                                | ---         | 236350_at    | 2.52E-03             | 0.41  | -2.47       |
| CASP7       | caspace 7, apoptosis-related cysteine peptidase                                  | 840         | 207181_s_at  | 6.37E-04             | 0.41  | -2.45       |
| ---         | Transcribed locus                                                                | ---         | 228479_at    | 6.93E-03             | 0.41  | -2.44       |
| CENPO       | centromere protein O                                                             | 79172       | 226118_at    | 5.89E-05             | 0.41  | -2.43       |
| LOC149832   | hypothetical protein LOC149832                                                   | 149832      | 228456_s_at  | 8.87E-05             | 0.41  | -2.42       |
| FHL2        | four and a half LIM domains 2                                                    | 2274        | 202949_s_at  | 5.14E-05             | 0.41  | -2.42       |
| ---         | CDNA FLJ33585 fis, clone BRAMY2012163                                            | ---         | 1556194_a_at | 6.87E-04             | 0.42  | -2.40       |
| CUGBP2      | CUG triplet repeat, RNA binding protein 2                                        | 10659       | 202156_s_at  | 6.08E-05             | 0.42  | -2.40       |
| LOC731484   | hypothetical LOC731484                                                           | 730069      | 242539_at    | 2.33E-03             | 0.43  | -2.35       |
| ---         | Transcribed locus                                                                | ---         | 230659_at    | 3.94E-03             | 0.43  | -2.35       |
| UBASH3B     | ubiquitin associated and SH3 domain containing, B                                | 84959       | 238462_at    | 1.42E-02             | 0.43  | -2.34       |
| TMEM64      | transmembrane protein 64                                                         | 169200      | 225972_at    | 1.07E-04             | 0.43  | -2.33       |
| HIST1H3H    | histone cluster 1, H3h                                                           | 8357        | 206110_at    | 9.48E-05             | 0.43  | -2.33       |
| WDR40A      | WD repeat domain 40A                                                             | 25853       | 224789_at    | 3.12E-05             | 0.44  | -2.29       |
| CETN2       | centrin, EF-hand protein, 2                                                      | 1069        | 209194_at    | 6.24E-04             | 0.44  | -2.28       |
| ---         | CDNA FLJ31919 fis, clone NT2RP7004964                                            | ---         | 214949_at    | 1.76E-03             | 0.44  | -2.28       |
| DPY19L2P2   | dpy-19-like 2 pseudogene 2 (C. elegans)                                          | 349152      | 215143_at    | 3.53E-03             | 0.44  | -2.25       |
| ROD1        | ROD1 regulator of differentiation 1 (S. pombe)                                   | 9991        | 214697_s_at  | 6.19E-03             | 0.44  | -2.25       |
| NLGN1       | neuroligin 1                                                                     | 22871       | 205893_at    | 1.94E-04             | 0.45  | -2.24       |
| TMF1        | TATA element modulatory factor 1                                                 | 7110        | 214948_s_at  | 1.12E-03             | 0.45  | -2.23       |
| GOLM1       | golgi membrane protein 1                                                         | 51280       | 217771_at    | 5.30E-04             | 0.45  | -2.22       |
| CDK6        | cyclin-dependent kinase 6                                                        | 1021        | 235287_at    | 1.08E-02             | 0.45  | -2.22       |
| SAR1A       | SAR1 gene homolog A (S. cerevisiae)                                              | 56681       | 201542_at    | 3.47E-04             | 0.45  | -2.21       |
| ---         | Transcribed locus                                                                | 84901       | 229235_at    | 1.05E-02             | 0.45  | -2.21       |
| CRTAP       | cartilage associated protein                                                     | 10491       | 1555889_a_at | 4.38E-03             | 0.46  | -2.20       |
| KIAA0368    | KIAA0368                                                                         | 23392       | 212427_at    | 3.73E-03             | 0.46  | -2.19       |
| TRIOBP      | TRIO and F-actin binding protein                                                 | 11078       | 210276_s_at  | 2.32E-04             | 0.46  | -2.18       |
| CDH13       | cadherin 13, H-cadherin (heart)                                                  | 1012        | 204726_at    | 1.06E-02             | 0.46  | -2.16       |
| ROD1        | ROD1 regulator of differentiation 1 (S. pombe)                                   | 9991        | 224617_at    | 6.61E-03             | 0.46  | -2.16       |
| ---         | Transcribed locus                                                                | ---         | 235286_at    | 5.88E-03             | 0.46  | -2.15       |
| NUPL1       | nucleoporin like 1                                                               | 9818        | 204435_at    | 2.10E-02             | 0.47  | -2.14       |
| ROD1        | ROD1 regulator of differentiation 1 (S. pombe)                                   | 9991        | 224618_at    | 4.16E-03             | 0.47  | -2.14       |
| C20orf177   | chromosome 20 open reading frame 177                                             | ---         | 225313_at    | 1.89E-04             | 0.47  | -2.13       |

|           |                                                                                  |        |              |          |      |       |
|-----------|----------------------------------------------------------------------------------|--------|--------------|----------|------|-------|
| CRTAP     | cartilage associated protein                                                     | 10491  | 1554464_a_at | 5.32E-03 | 0.47 | -2.13 |
| LPP       | LIM domain containing preferred translocation partner in lipoma                  | 4026   | 202822_at    | 1.26E-03 | 0.47 | -2.12 |
| SNX1      | sorting nexin 1                                                                  | 6642   | 213364_s_at  | 1.10E-03 | 0.47 | -2.12 |
| CCNYL1    | Cyclin Y-like 1                                                                  | 151195 | 227280_s_at  | 1.86E-03 | 0.47 | -2.12 |
| ARHGAP1   | Rho GTPase activating protein 1                                                  | 392    | 202117_at    | 3.04E-04 | 0.47 | -2.12 |
| PEX19     | peroxisomal biogenesis factor 19                                                 | 5824   | 201707_at    | 2.70E-03 | 0.47 | -2.11 |
| NUBP1     | nucleotide binding protein 1 (MinD homolog, E. coli)                             | 4682   | 203978_at    | 5.08E-04 | 0.47 | -2.11 |
| DSC3      | desmocollin 3                                                                    | 1825   | 206032_at    | 9.78E-04 | 0.47 | -2.11 |
| CUGBP2    | CUG triplet repeat, RNA binding protein 2                                        | 10659  | 202158_s_at  | 2.41E-03 | 0.47 | -2.11 |
| TPM1      | tropomyosin (alpha)                                                              | 7168   | 206117_at    | 2.93E-04 | 0.48 | -2.10 |
| WDR35     | WD repeat domain 35                                                              | 57539  | 226889_at    | 4.48E-04 | 0.48 | -2.09 |
| EPPK1     | epiplakin 1                                                                      | 83481  | 232164_s_at  | 2.48E-03 | 0.48 | -2.08 |
| HAS2      | hyaluronan synthase 2                                                            | 3037   | 206432_at    | 8.32E-03 | 0.48 | -2.07 |
| CRIP1     | cysteine-rich PDZ-binding protein                                                | 9419   | 218643_s_at  | 9.91E-04 | 0.48 | -2.07 |
| TMEM64    | transmembrane protein 64                                                         | 169200 | 225974_at    | 5.22E-04 | 0.48 | -2.06 |
| NFATC2IP  | nuclear factor of activated T-cells, cytoplasmic, calcineurin-dependent 2 intera | 84901  | 217526_at    | 4.87E-03 | 0.49 | -2.04 |
| C14orf129 | chromosome 14 open reading frame 129                                             | 51527  | 223239_at    | 2.13E-04 | 0.49 | -2.04 |
| PTGER4    | prostaglandin E receptor 4 (subtype EP4)                                         | 5734   | 204897_at    | 3.72E-02 | 0.49 | -2.04 |
| BPGM      | 2,3-bisphosphoglycerate mutase                                                   | 669    | 203502_at    | 1.75E-03 | 0.49 | -2.04 |
| ---       | CDNA clone IMAGE:3462401                                                         | ---    | 228008_at    | 2.78E-04 | 0.49 | -2.04 |
| CCDC50    | coiled-coil domain containing 50                                                 | 152137 | 226713_at    | 4.82E-03 | 0.49 | -2.03 |
| BLCAP     | bladder cancer associated protein                                                | 10904  | 201032_at    | 1.02E-05 | 0.49 | -2.03 |
| KDSR      | 3-ketodihydroshingosine reductase                                                | 2531   | 229850_at    | 1.33E-03 | 0.49 | -2.02 |
| ---       | ---                                                                              | ---    | 227921_at    | 1.26E-03 | 0.50 | -2.02 |
| CASP6     | caspace 6, apoptosis-related cysteine peptidase                                  | 839    | 211464_x_at  | 1.40E-03 | 0.50 | -2.01 |
| SPIN3     | spindlin family, member 3                                                        | 169981 | 1555882_at   | 6.66E-03 | 0.50 | -2.01 |
| MGC16275  | hypothetical protein MGC16275                                                    | 85001  | 1558166_at   | 4.17E-04 | 0.50 | -2.01 |
| HP1BP3    | heterochromatin protein 1, binding protein 3                                     | 50809  | 1554251_at   | 9.94E-04 | 0.50 | -2.01 |
| CYFIP2    | cytoplasmic FMR1 interacting protein 2                                           | 26999  | 220999_s_at  | 2.59E-02 | 0.50 | -2.01 |
| GRPEL1    | GrpE-like 1, mitochondrial (E. coli)                                             | 80273  | 212434_at    | 9.14E-05 | 0.50 | -2.00 |
| EPPK1     | epiplakin 1                                                                      | 83481  | 232165_at    | 2.17E-03 | 0.50 | -2.00 |
| ---       | Transcribed locus                                                                | ---    | 227959_at    | 6.23E-04 | 0.50 | -2.00 |
| DIDO1     | death inducer-obliterator 1                                                      | 11083  | 227335_at    | 1.32E-03 | 0.50 | -2.00 |
| RBM17     | RNA binding motif protein 17                                                     | 84991  | 224780_at    | 3.24E-04 | 0.50 | -1.99 |
| USP3      | ubiquitin specific peptidase 3                                                   | 9960   | 226652_at    | 3.19E-05 | 0.50 | -1.99 |
| LASP1     | LIM and SH3 protein 1                                                            | 3927   | 200618_at    | 3.04E-04 | 0.50 | -1.98 |
| ZNF805    | zinc finger protein 805                                                          | 390980 | 238436_s_at  | 2.69E-03 | 0.50 | -1.98 |
| ---       | CDNA FLJ41728 fis                                                                | ---    | 227125_at    | 2.24E-03 | 0.51 | -1.98 |
| FN1       | fibronectin 1                                                                    | 2335   | 211719_x_at  | 8.75E-03 | 0.51 | -1.98 |
| FBXO9     | F-box protein 9                                                                  | 26268  | 212991_at    | 1.13E-02 | 0.51 | -1.97 |
| FKBP14    | FK506 binding protein 14                                                         | 55033  | 235311_at    | 4.76E-03 | 0.51 | -1.97 |
| C11orf59  | chromosome 11 orf 59                                                             | 55004  | 223009_at    | 2.20E-04 | 0.51 | -1.97 |
| IQCE      | IQ motif containing E                                                            | 23288  | 204202_at    | 2.32E-04 | 0.51 | -1.97 |
| TUBG1     | tubulin, gamma 1                                                                 | 7283   | 201714_at    | 4.62E-03 | 0.51 | -1.96 |
| TBC1D24   | TBC1 domain family, member 24                                                    | 57465  | 227908_at    | 3.26E-05 | 0.51 | -1.96 |
| CCDC117   | coiled-coil domain containing 117                                                | 150275 | 225644_at    | 2.21E-04 | 0.51 | -1.96 |
| GLO1      | glyoxalase I                                                                     | 2739   | 200681_at    | 1.46E-03 | 0.51 | -1.95 |
| LYPD1     | LY6/PLAUR domain containing 1                                                    | 116372 | 212909_at    | 1.27E-02 | 0.51 | -1.95 |
| PLAGL2    | pleiomorphic adenoma gene-like                                                   | 5326   | 202925_s_at  | 1.85E-03 | 0.51 | -1.94 |
| MED8      | mediator complex subunit 8                                                       | 112950 | 213126_at    | 3.51E-05 | 0.51 | -1.94 |
| HLA-B     | major histocompatibility complex, class I, B                                     | 4277   | 206247_at    | 9.22E-04 | 0.52 | -1.94 |
| VTI1A     | vesicle transport through interaction with t-SNAREs homolog 1A (yeast)           | 143187 | 236849_at    | 2.67E-02 | 0.52 | -1.94 |
| WDR68     | WD repeat domain 68                                                              | 10238  | 221744_at    | 4.85E-04 | 0.52 | -1.94 |
| CCDC50    | coiled-coil domain containing 50                                                 | 152137 | 228693_at    | 2.39E-03 | 0.52 | -1.93 |
| TPK1      | thiamin pyrophosphokinase 1                                                      | 27010  | 221218_s_at  | 5.88E-04 | 0.52 | -1.93 |
| GRHL1     | grainyhead-like 1 (Drosophila)                                                   | 29841  | 222830_at    | 2.10E-05 | 0.52 | -1.93 |
| ---       | CDNA FLJ42315 fis                                                                | ---    | 230300_at    | 4.32E-03 | 0.52 | -1.93 |
| WDR68     | WD repeat domain 68                                                              | 10238  | 224748_at    | 2.06E-04 | 0.52 | -1.92 |
| ---       | CDNA FLJ37658 fis                                                                | ---    | 226485_at    | 8.32E-05 | 0.52 | -1.92 |
| ACTA2     | actin, alpha 2                                                                   | 59     | 200974_at    | 5.17E-03 | 0.52 | -1.91 |
| SSFA2     | Sperm specific antigen 2                                                         | 6744   | 229744_at    | 3.38E-03 | 0.52 | -1.91 |

|              |                                                                                  |        |              |          |      |       |
|--------------|----------------------------------------------------------------------------------|--------|--------------|----------|------|-------|
| RAB11A       | RAB11A, member RAS oncogene family                                               | 8766   | 200864_s_at  | 1.32E-04 | 0.52 | -1.91 |
| ---          | Transcribed locus                                                                | ---    | 241879_at    | 5.02E-04 | 0.53 | -1.90 |
| C19orf56     | chromosome 19 orf 56                                                             | 51398  | 217780_at    | 6.93E-04 | 0.53 | -1.90 |
| CCDC25       | coiled-coil domain containing 25                                                 | 55246  | 218125_s_at  | 2.90E-03 | 0.53 | -1.90 |
| NLGN1        | Neuroigin 1                                                                      | 22871  | 231361_at    | 3.21E-04 | 0.53 | -1.90 |
| C3orf10      | chromosome 3 orf 10                                                              | 55845  | 224575_at    | 1.26E-03 | 0.53 | -1.89 |
| CCDC50       | coiled-coil domain containing 50                                                 | 152137 | 235051_at    | 8.06E-03 | 0.53 | -1.89 |
| BCR          | breakpoint cluster region                                                        | 400892 | 226602_s_at  | 7.89E-03 | 0.53 | -1.89 |
| MXD1         | MAX dimerization protein 1                                                       | 4084   | 228846_at    | 1.05E-02 | 0.53 | -1.89 |
| C9orf58      | chromosome 9 open reading frame 58                                               | 83543  | 223075_s_at  | 1.09E-03 | 0.53 | -1.89 |
| EDEM1        | ER degradation enhancer, mannosidase alpha-like 1                                | 9695   | 203279_at    | 8.90E-04 | 0.53 | -1.89 |
| SRI          | sorcin                                                                           | 6717   | 208921_s_at  | 5.81E-04 | 0.53 | -1.89 |
| XRN1         | 5'-3' exoribonuclease 1                                                          | 54464  | 225814_at    | 2.45E-03 | 0.53 | -1.89 |
| CRTAP        | cartilage associated protein                                                     | 10491  | 201380_at    | 8.06E-03 | 0.53 | -1.89 |
| LOC149832    | Hypothetical protein LOC149832                                                   | 149832 | 230502_s_at  | 4.72E-03 | 0.53 | -1.89 |
| NFATC2IP     | nuclear factor of activated T-cells                                              | 84901  | 217527_s_at  | 7.30E-03 | 0.53 | -1.88 |
| ---          | CDNA clone IMAGE:6208446                                                         | ---    | 221844_x_at  | 2.77E-03 | 0.53 | -1.88 |
| ---          | CDNA clone IMAGE:5277883                                                         | ---    | 1558445_at   | 1.22E-03 | 0.53 | -1.88 |
| FKBP14       | FK506 binding protein 14                                                         | 55033  | 219390_at    | 7.32E-05 | 0.53 | -1.88 |
| HIST1H2AC    | histone cluster 1, H2ac                                                          | 8334   | 215071_s_at  | 1.32E-03 | 0.53 | -1.88 |
| TTC9         | tetratricopeptide repeat domain 9                                                | 23508  | 213172_at    | 7.40E-06 | 0.53 | -1.88 |
| SLC25A14     | solute carrier family 25 mem 14                                                  | 9016   | 204587_at    | 4.93E-04 | 0.53 | -1.87 |
| ---          | Transcribed locus                                                                | ---    | 243996_at    | 3.88E-02 | 0.53 | -1.87 |
| GNA11        | guanine nucleotide binding protein (G protein), alpha 11                         | 2767   | 213766_x_at  | 4.17E-04 | 0.53 | -1.87 |
| ZNF738       | zinc finger protein 738                                                          | 148203 | 229700_at    | 1.17E-02 | 0.53 | -1.87 |
| FN1          | fibronectin 1                                                                    | 2335   | 210495_x_at  | 2.19E-02 | 0.53 | -1.87 |
| ---          | Transcribed locus                                                                | ---    | 221973_at    | 1.11E-02 | 0.54 | -1.87 |
| FBXO9        | F-box protein 9                                                                  | 26268  | 238472_at    | 3.93E-03 | 0.54 | -1.87 |
| CCNDBP1      | cyclin D-type binding-protein 1                                                  | 23582  | 223084_s_at  | 8.75E-04 | 0.54 | -1.86 |
| MAN2A1       | mannosidase, alpha, class 2A, member 1                                           | 4124   | 226538_at    | 9.14E-04 | 0.54 | -1.86 |
| CAMSAP1      | calmodulin regulated spectrin-associated protein 1                               | 157922 | 212711_at    | 5.58E-04 | 0.54 | -1.86 |
| KDSR         | 3-ketodihydroshingosine reductase                                                | 2531   | 1558279_a_at | 1.05E-03 | 0.54 | -1.86 |
| ATAD2B       | ATPase family, AAA domain containing 2B                                          | 54454  | 213387_at    | 6.36E-04 | 0.54 | -1.86 |
| MDH2         | malate dehydrogenase 2, NAD (mitochondrial)                                      | 4191   | 213333_at    | 4.64E-04 | 0.54 | -1.86 |
| MAN2A1       | mannosidase, alpha, class 2A, member 1                                           | 4124   | 235103_at    | 1.18E-03 | 0.54 | -1.85 |
| ECM2         | extracellular matrix protein 2                                                   | 1842   | 206101_at    | 1.90E-02 | 0.54 | -1.85 |
| CUGBP2       | CUG triplet repeat, RNA BP 2                                                     | 10659  | 202157_s_at  | 8.66E-03 | 0.54 | -1.85 |
| ---          | Clone IMAGE:111714 mRNA                                                          | ---    | 228466_at    | 6.70E-03 | 0.54 | -1.85 |
| ARL8B        | ADP-ribosylation factor-like 8B                                                  | 55207  | 217852_s_at  | 9.57E-06 | 0.54 | -1.85 |
| USP6NL       | USP6 N-terminal like                                                             | 9712   | 238164_at    | 6.22E-03 | 0.54 | -1.85 |
| ZNF805       | zinc finger protein 805                                                          | 390980 | 235398_at    | 1.05E-03 | 0.54 | -1.85 |
| MED8         | mediator complex subunit 8                                                       | 112950 | 213127_s_at  | 1.62E-04 | 0.54 | -1.85 |
| GATAD2A      | GATA zinc finger domain containing 2A                                            | 54815  | 222526_at    | 2.64E-04 | 0.54 | -1.85 |
| IFRD2        | interferon-related developmental regulator 2                                     | 7866   | 209100_at    | 2.26E-04 | 0.54 | -1.84 |
| PPT1         | palmitoyl-protein thioesterase 1                                                 | 5538   | 200975_at    | 3.46E-04 | 0.54 | -1.84 |
| TMEM64       | transmembrane protein 64                                                         | 169200 | 242338_at    | 1.54E-02 | 0.54 | -1.84 |
| SPCS3        | signal peptidase complex subunit 3 homolog (S. cerevisiae)                       | 60559  | 218817_at    | 1.45E-02 | 0.55 | -1.83 |
| FN1          | fibronectin 1                                                                    | 2335   | 216442_x_at  | 3.40E-02 | 0.55 | -1.83 |
| CKAP4        | cytoskeleton-associated protein 4                                                | 10970  | 200999_s_at  | 4.00E-03 | 0.55 | -1.83 |
| LOC100130506 | hypothetical protein LOC100130506                                                | ---    | 236656_s_at  | 2.17E-03 | 0.55 | -1.82 |
| FN1          | fibronectin 1                                                                    | 2335   | 212464_s_at  | 2.82E-02 | 0.55 | -1.82 |
| SUSD1        | sushi domain containing 1                                                        | 64420  | 226264_at    | 1.33E-03 | 0.55 | -1.82 |
| SLC25A37     | solute carrier family 25, member 37                                              | 51312  | 226179_at    | 2.20E-03 | 0.55 | -1.82 |
| RPS15A       | Ribosomal protein S15a                                                           | 6210   | 235309_at    | 1.28E-03 | 0.55 | -1.82 |
| BMP2K        | BMP2 inducible kinase                                                            | 55589  | 59644_at     | 4.21E-02 | 0.55 | -1.82 |
| FIBIN        | fin bud initiation factor                                                        | 387758 | 226769_at    | 1.41E-02 | 0.55 | -1.82 |
| ---          | Transcribed locus                                                                | ---    | 230728_at    | 1.08E-04 | 0.55 | -1.81 |
| VANGL1       | vang-like 1                                                                      | 81839  | 219330_at    | 2.75E-03 | 0.55 | -1.81 |
| GALNT1       | UDP-N-acetyl-alpha-D-galactosamine:polypeptide N-acetylgalactosaminyltransferase | 2589   | 201724_s_at  | 7.45E-04 | 0.55 | -1.81 |
| ARHGAP26     | Rho GTPase activating protein 26                                                 | 23092  | 226576_at    | 1.61E-03 | 0.55 | -1.81 |



|              |                                                                                  |        |              |          |      |       |
|--------------|----------------------------------------------------------------------------------|--------|--------------|----------|------|-------|
| PKD2         | polycystic kidney disease 2                                                      | 5311   | 203688_at    | 1.04E-03 | 0.55 | -1.81 |
| ITGB4        | integrin, beta 4                                                                 | 3691   | 204990_s_at  | 5.95E-03 | 0.55 | -1.81 |
| AHI1         | Abelson helper integration site 1                                                | 54806  | 221569_at    | 1.33E-03 | 0.55 | -1.81 |
| TP53INP1     | tumor protein p53 inducible nuclear protein 1                                    | 94241  | 225912_at    | 6.49E-03 | 0.55 | -1.80 |
| KCNJ12       | potassium inwardly-rectifying channel, subfamily J, member 12                    | 3768   | 207110_at    | 1.59E-03 | 0.56 | -1.80 |
| BTBD7        | BTB (POZ) domain containing 7                                                    | 55727  | 224945_at    | 2.27E-03 | 0.56 | -1.80 |
| GNA11        | guanine nucleotide binding protein (G protein), alpha 11                         | 2767   | 40562_at     | 1.94E-03 | 0.56 | -1.80 |
| C12orf44     | chromosome 12 orf 44                                                             | 60673  | 218214_at    | 8.84E-05 | 0.56 | -1.80 |
| SHISA2       | shisa homolog 2                                                                  | 387914 | 230493_at    | 3.35E-02 | 0.56 | -1.80 |
| LPGAT1       | lysophosphatidylglycerol acyltransferase 1                                       | 9926   | 202651_at    | 8.10E-04 | 0.56 | -1.80 |
| GNG12        | guanine nucleotide binding protein (G protein), gamma 12                         | 55970  | 212294_at    | 9.80E-04 | 0.56 | -1.79 |
| CKAP4        | cytoskeleton-associated protein 4                                                | 10970  | 200998_s_at  | 4.02E-02 | 0.56 | -1.79 |
| ---          | Transcribed locus                                                                | ---    | 242486_at    | 1.19E-02 | 0.56 | -1.79 |
| ALDH6A1      | aldehyde dehydrogenase 6 family, member A1                                       | 4329   | 221589_s_at  | 1.86E-02 | 0.56 | -1.79 |
| ---          | Transcribed locus                                                                | ---    | 230399_at    | 1.55E-03 | 0.56 | -1.79 |
| NNT          | nicotinamide nucleotide transhydrogenase                                         | 23530  | 238530_at    | 2.51E-03 | 0.56 | -1.79 |
| GALNAC4S-6ST | B cell RAG associated protein                                                    | 51363  | 203066_at    | 2.68E-04 | 0.56 | -1.79 |
| ---          | CDNA clone IMAGE:5313062                                                         | ---    | 234998_at    | 2.83E-04 | 0.56 | -1.78 |
| IDH1         | isocitrate dehydrogenase 1                                                       | 3417   | 1555037_a_at | 1.08E-02 | 0.56 | -1.78 |
| RGS20        | regulator of G-protein signaling                                                 | 8601   | 210138_at    | 2.99E-02 | 0.56 | -1.78 |
| ---          | Transcribed locus                                                                | ---    | 228925_at    | 6.05E-03 | 0.56 | -1.78 |
| CREBL2       | cAMP responsive element binding protein-like 2                                   | 1389   | 201990_s_at  | 4.41E-03 | 0.56 | -1.77 |
| ---          | CDNA FLJ30652 fis                                                                | ---    | 235000_at    | 4.62E-04 | 0.56 | -1.77 |
| SLU7         | SLU7 splicing factor homolog                                                     | 10569  | 227990_at    | 2.46E-04 | 0.56 | -1.77 |
| ---          | Transcribed locus                                                                | ---    | 235685_at    | 3.82E-03 | 0.56 | -1.77 |
| ---          | Transcribed locus                                                                | ---    | 239292_at    | 7.96E-03 | 0.56 | -1.77 |
| ---          | ---                                                                              | ---    | 244107_at    | 2.78E-03 | 0.56 | -1.77 |
| ALMS1        | Alstrom syndrome 1                                                               | 7840   | 214221_at    | 7.26E-03 | 0.57 | -1.77 |
| DOCK4        | dedicator of cytokinesis 4                                                       | 9732   | 205003_at    | 1.78E-02 | 0.57 | -1.77 |
| KCNJ12       | potassium inwardly-rectifying channel, subfamily J, member 12                    | 3768   | 232289_at    | 8.90E-03 | 0.57 | -1.77 |
| TRIOBP       | TRIO and F-actin binding protein                                                 | 11078  | 202795_x_at  | 1.60E-04 | 0.57 | -1.77 |
| GNA11        | guanine nucleotide binding protein (G protein), alpha 11                         | 2767   | 564_at       | 1.77E-03 | 0.57 | -1.76 |
| TAF11        | TAF11 RNA polymerase II, TATA box binding protein (TBP)-associated factor, 28kDa | 6882   | 1558136_s_at | 2.61E-04 | 0.57 | -1.76 |
| RABL2B       | RAB, member of RAS oncogene family-like 2B                                       | 11159  | 219151_s_at  | 2.71E-03 | 0.57 | -1.76 |
| EEA1         | early endosome antigen 1                                                         | 8411   | 225885_at    | 2.11E-03 | 0.57 | -1.75 |
| HYPK         | Huntingtin interacting protein K                                                 | 25764  | 218680_x_at  | 3.24E-03 | 0.57 | -1.75 |
| NBPF14       | neuroblastoma breakpoint family, member 14                                       | 400818 | 227926_s_at  | 3.17E-03 | 0.57 | -1.75 |
| SLC6A6       | solute carrier family 6, member 6                                                | 6533   | 205920_at    | 1.03E-02 | 0.57 | -1.75 |
| KCTD12       | potassium channel tetramerisation domain cont. 12                                | 115207 | 212192_at    | 3.35E-03 | 0.57 | -1.75 |
| H2BFS        | H2B histone family, member S                                                     | 54145  | 208579_x_at  | 5.41E-03 | 0.57 | -1.75 |
| BTBD7        | BTB (POZ) domain containing 7                                                    | 55727  | 224943_at    | 2.88E-03 | 0.57 | -1.75 |
| IDH1         | isocitrate dehydrogenase 1 (NADP+), soluble                                      | 3417   | 201193_at    | 1.79E-02 | 0.57 | -1.75 |
| BCAT2        | branched chain aminotransferase 2, mitochondrial                                 | 587    | 203576_at    | 5.90E-05 | 0.57 | -1.75 |
| HIST1H2AI    | histone cluster 1, H2ai                                                          | 8969   | 207156_at    | 3.48E-04 | 0.57 | -1.75 |
| CAMSAP1      | calmodulin regulated spectrin-associated protein 1                               | 157922 | 212710_at    | 3.05E-04 | 0.57 | -1.74 |
| MTF1         | metal-regulatory transcription factor 1                                          | 4520   | 227150_at    | 1.16E-02 | 0.57 | -1.74 |
| CSRP1        | cysteine and glycine-rich prot. 1                                                | 1465   | 200621_at    | 4.94E-03 | 0.57 | -1.74 |
| MARCH5       | membrane-associated ring finger (C3HC4) 5                                        | 54708  | 218582_at    | 3.91E-04 | 0.57 | -1.74 |
| SDHC         | succinate dehydrogenase complex, subunit C, integral membrane protein, 15kDa     | 6391   | 215088_s_at  | 2.27E-03 | 0.57 | -1.74 |
| ---          | CDNA FLJ37917 fis                                                                | ---    | 229460_at    | 1.28E-03 | 0.57 | -1.74 |
| SLC47A1      | solute carrier family 47, mem. 1                                                 | 55244  | 219525_at    | 1.92E-02 | 0.57 | -1.74 |
| KRT17        | keratin 17                                                                       | 3872   | 205157_s_at  | 2.80E-02 | 0.57 | -1.74 |
| FAM105B      | family with sequence similarity 105, member B                                    | 90268  | 229268_at    | 2.19E-03 | 0.58 | -1.74 |
| SLITRK5      | SLIT and NTRK-like family, mem. 5                                                | 26050  | 214930_at    | 1.88E-03 | 0.58 | -1.74 |
| ---          | Transcribed locus                                                                | ---    | 238700_at    | 9.96E-04 | 0.58 | -1.74 |
| LOC644617    | hypothetical LOC644617                                                           | 644617 | 221235_s_at  | 3.75E-03 | 0.58 | -1.74 |
| XRN1         | 5'-3' exoribonuclease 1                                                          | 54464  | 233632_s_at  | 1.63E-03 | 0.58 | -1.74 |
| PCBP2        | poly(rC) binding protein 2                                                       | 5094   | 213263_s_at  | 1.06E-03 | 0.58 | -1.74 |
| MAGED2       | melanoma antigen family D, 2                                                     | 10916  | 208682_s_at  | 2.11E-03 | 0.58 | -1.74 |
| THSD4        | thrombospondin, type I, domain containing 4                                      | 79875  | 222835_at    | 1.32E-02 | 0.58 | -1.74 |

|              |                                                                                  |        |              |          |      |       |
|--------------|----------------------------------------------------------------------------------|--------|--------------|----------|------|-------|
| KIAA0999     | KIAA0999 protein                                                                 | 23387  | 213034_at    | 2.87E-03 | 0.58 | -1.74 |
| PRKACB       | protein kinase, cAMP-dependent, catalytic, beta                                  | 5567   | 202742_s_at  | 1.41E-03 | 0.58 | -1.74 |
| NAV1         | neuron navigator 1                                                               | 89796  | 224772_at    | 1.02E-02 | 0.58 | -1.74 |
| C1orf19      | chromosome 1 orf 19                                                              | 116461 | 225399_at    | 2.90E-03 | 0.58 | -1.74 |
| ATPAF2       | ATP synthase mitochondrial F1 complex assembly factor 2                          | 91647  | 213057_at    | 2.26E-04 | 0.58 | -1.73 |
| SLC25A14     | solute carrier family 25, mem. 14                                                | 9016   | 211855_s_at  | 4.09E-04 | 0.58 | -1.73 |
| CDK6         | cyclin-dependent kinase 6                                                        | 1021   | 243000_at    | 2.45E-03 | 0.58 | -1.73 |
| ---          | ---                                                                              | ---    | 228443_s_at  | 1.09E-02 | 0.58 | -1.73 |
| HIST1H2BK    | histone cluster 1, H2bk                                                          | 85236  | 209806_at    | 1.27E-03 | 0.58 | -1.73 |
| SPATA18      | spermatogenesis associated 18 homolog (rat)                                      | 132671 | 229331_at    | 7.59E-03 | 0.58 | -1.73 |
| NASP         | nuclear autoantigenic sperm protein (histone-binding)                            | 4678   | 201969_at    | 8.16E-03 | 0.58 | -1.73 |
| TRIOBP       | TRIO and F-actin binding protein                                                 | 11078  | 216210_x_at  | 6.41E-05 | 0.58 | -1.73 |
| ARGLU1       | arginine and glutamate rich 1                                                    | 55082  | 227448_at    | 2.19E-02 | 0.58 | -1.73 |
| GLCE         | glucuronic acid epimerase                                                        | 26035  | 213552_at    | 2.43E-03 | 0.58 | -1.73 |
| SDHC         | succinate dehydrogenase complex, subunit C, integral membrane protein, 15kDa     | 6391   | 210131_x_at  | 1.48E-03 | 0.58 | -1.73 |
| EIF2C2       | Eukaryotic translation initiation factor 2C, 2                                   | 27161  | 225569_at    | 4.11E-02 | 0.58 | -1.73 |
| ARID3B       | AT rich interactive domain 3B                                                    | 10620  | 218964_at    | 7.27E-03 | 0.58 | -1.73 |
| ---          | CDNA FLJ34899 fis, clone NT2NE2018594                                            | ---    | 226719_at    | 2.09E-04 | 0.58 | -1.72 |
| ---          | Transcribed locus                                                                | ---    | 230918_at    | 1.83E-02 | 0.58 | -1.72 |
| TCTEX1D2     | transmembrane 4 L six family member 19 /// Tctex1 domain containing 2            | 255758 | 228606_at    | 4.83E-03 | 0.58 | -1.72 |
| /// TM4SF19  |                                                                                  |        |              |          |      |       |
| PHKA1        | phosphorylase kinase, alpha 1 (muscle)                                           | 5255   | 229876_at    | 8.18E-03 | 0.58 | -1.72 |
| GNA11        | guanine nucleotide binding protein (G protein), alpha 11 (Gq class)              | 2767   | 213944_x_at  | 4.36E-04 | 0.58 | -1.72 |
| ---          | CDNA clone IMAGE:6576427                                                         | ---    | 228156_at    | 1.16E-02 | 0.58 | -1.72 |
| ---          | CDNA FLJ34038 fis, clone FCBBF2005645                                            | ---    | 244779_at    | 1.16E-02 | 0.58 | -1.72 |
| KIAA0999     | KIAA0999 protein                                                                 | 23387  | 204156_at    | 1.97E-03 | 0.58 | -1.72 |
| CAMK2N1      | calcium/calmodulin-dependent protein kinase II inhibitor 1                       | 55450  | 218309_at    | 1.08E-02 | 0.58 | -1.72 |
| FAM130A1     | family with sequence similarity 130, member A1                                   | 81566  | 221260_s_at  | 1.53E-03 | 0.58 | -1.72 |
| FAT3         | FAT tumor suppressor homolog 3 (Drosophila)                                      | 120114 | 1558964_at   | 1.90E-02 | 0.58 | -1.72 |
| DUSP6        | dual specificity phosphatase 6                                                   | 1848   | 208892_s_at  | 9.10E-03 | 0.58 | -1.72 |
| SRD5A1       | steroid-5-alpha-reductase, alpha polypeptide 1 (3-oxo-5-alpha-steroid delta 4-de | 6715   | 204675_at    | 6.38E-04 | 0.58 | -1.72 |
| ICK          | intestinal cell (MAK-like) kinase                                                | 22858  | 204569_at    | 5.18E-03 | 0.58 | -1.71 |
| MAN2A1       | mannosidase, alpha, class 2A, member 1                                           | 4124   | 205105_at    | 1.46E-02 | 0.58 | -1.71 |
| ---          | CDNA clone IMAGE:3867353                                                         | ---    | 240121_x_at  | 1.94E-03 | 0.58 | -1.71 |
| DSC3         | desmocollin 3                                                                    | 1825   | 206033_s_at  | 1.06E-03 | 0.59 | -1.71 |
| TAF8         | TAF8 RNA polymerase II, TATA box binding protein (TBP)-associated factor, 43kDa  | 129685 | 1556178_x_at | 2.22E-04 | 0.59 | -1.71 |
| ---          | Transcribed locus                                                                | ---    | 241826_x_at  | 1.67E-03 | 0.59 | -1.71 |
| ALDH3B1      | aldehyde dehydrogenase 3 family, member B1                                       | 221    | 205640_at    | 1.61E-02 | 0.59 | -1.71 |
| SAPS2        | SAPS domain family, member 2                                                     | 9701   | 202792_s_at  | 5.43E-03 | 0.59 | -1.70 |
| GNA11        | guanine nucleotide binding protein (G protein), alpha 11 (Gq class)              | 2767   | 204248_at    | 8.40E-03 | 0.59 | -1.70 |
| ARID3A       | AT rich interactive domain 3A (BRIGHT-like)                                      | 1820   | 205865_at    | 1.60E-03 | 0.59 | -1.70 |
| FASTK        | Fas-activated serine/threonine kinase                                            | 10922  | 210975_x_at  | 6.21E-05 | 0.59 | -1.70 |
| VPS24        | vacuolar protein sorting 24 homolog (S. cerevisiae)                              | 51652  | 222437_s_at  | 1.03E-03 | 0.59 | -1.70 |
| ZNF512       | zinc finger protein 512                                                          | 84450  | 225050_at    | 3.70E-04 | 0.59 | -1.70 |
| PRKACB       | protein kinase, cAMP-dependent, catalytic, beta                                  | 5567   | 202741_at    | 1.93E-05 | 0.59 | -1.70 |
| ENY2         | enhancer of yellow 2 homolog (Drosophila)                                        | 56943  | 226776_at    | 1.23E-02 | 0.59 | -1.70 |
| ETNK1        | ethanolamine kinase 1                                                            | 55500  | 225290_at    | 6.24E-03 | 0.59 | -1.70 |
| ZNF805       | zinc finger protein 805                                                          | 390980 | 238437_at    | 8.55E-04 | 0.59 | -1.70 |
| ---          | Transcribed locus                                                                | ---    | 236200_at    | 6.30E-03 | 0.59 | -1.70 |
| ETNK1        | ethanolamine kinase 1                                                            | 55500  | 226432_at    | 6.42E-03 | 0.59 | -1.70 |
| SAMM50       | sorting and assembly machinery component 50 homolog                              | 25813  | 201570_at    | 8.50E-04 | 0.59 | -1.70 |
| WIBG         | within bgcn homolog (Drosophila)                                                 | 84305  | 242304_at    | 6.60E-05 | 0.59 | -1.70 |
| LOC100130476 | Similar to hCG2036711                                                            | ---    | 243871_at    | 1.17E-02 | 0.59 | -1.70 |
| SLC38A9      | solute carrier family 38, member 9                                               | 153129 | 235241_at    | 1.86E-03 | 0.59 | -1.69 |
| PIN4         | protein (peptidylprolyl cis/trans isomerase) NIMA-interacting, 4                 | 5303   | 204572_s_at  | 3.09E-02 | 0.59 | -1.69 |
| TLE1         | transducin-like enhancer of split 1 (E(sp1) homolog, Drosophila)                 | 7088   | 228284_at    | 3.85E-03 | 0.59 | -1.69 |
| MACROD1      | MACRO domain containing 1                                                        | 28992  | 219188_s_at  | 1.66E-02 | 0.59 | -1.69 |
| SEC14L1      | SEC14-like 1 (S. cerevisiae)                                                     | 6397   | 202084_s_at  | 5.48E-03 | 0.59 | -1.69 |
| DVL3         | dishevelled, dsh homolog 3                                                       | 1857   | 201908_at    | 8.27E-05 | 0.59 | -1.69 |

|           |                                                                                  |        |              |          |      |       |
|-----------|----------------------------------------------------------------------------------|--------|--------------|----------|------|-------|
| ---       | Transcribed locus                                                                | ---    | 1559067_a_at | 7.56E-04 | 0.59 | -1.69 |
| FAM120C   | family with sequence similarity 120C                                             | 54954  | 229512_at    | 1.11E-03 | 0.59 | -1.69 |
| WDFY1     | WD repeat and FYVE domain containing 1                                           | 57590  | 224800_at    | 1.44E-04 | 0.59 | -1.69 |
| BTBD7     | BTB (POZ) domain containing 7                                                    | 55727  | 1556000_s_at | 3.30E-03 | 0.59 | -1.69 |
| XK        | X-linked Kx blood group (McLeod syndrome)                                        | 7504   | 206698_at    | 5.15E-03 | 0.59 | -1.69 |
| ADAM19    | ADAM metallopeptidase domain 19 (meltrin beta)                                   | 8728   | 209765_at    | 9.77E-03 | 0.59 | -1.69 |
| RQCD1     | RCD1 required for cell differentiation1 homolog                                  | 9125   | 213179_at    | 5.16E-03 | 0.59 | -1.69 |
| ASF1B     | ASF1 anti-silencing function 1 homolog B (S. cerevisiae)                         | 55723  | 218115_at    | 1.93E-03 | 0.59 | -1.69 |
| KIAA0895  | KIAA0895 protein                                                                 | 23366  | 213424_at    | 1.99E-03 | 0.59 | -1.68 |
| GNB5      | guanine nucleotide binding protein (G protein), beta 5                           | 10681  | 207124_s_at  | 2.05E-03 | 0.59 | -1.68 |
| NISCH     | nischarin                                                                        | 11188  | 201591_s_at  | 8.38E-04 | 0.59 | -1.68 |
| SAMM50    | sorting and assembly machinery component 50 homolog (                            | 25813  | 201569_s_at  | 1.76E-03 | 0.59 | -1.68 |
| SLC6A6    | solute carrier family 6 (neurotransmitter transporter, taurine), member 6        | 6533   | 228754_at    | 8.09E-03 | 0.59 | -1.68 |
| SNRPD3    | small nuclear ribonucleoprotein D3 polypeptide 18kDa                             | 6634   | 202567_at    | 1.11E-03 | 0.59 | -1.68 |
| NFATC2IP  | nuclear factor of activated T-cells, cytoplasmic, calcineurin-dependent 2 intera | 84901  | 212808_at    | 3.39E-02 | 0.59 | -1.68 |
| SDHC      | succinate dehydrogenase complex, subunit C, integral membrane protein, 15kDa     | 6391   | 202004_x_at  | 1.75E-03 | 0.59 | -1.68 |
| CTPS      | CTP synthase                                                                     | 1503   | 202613_at    | 2.17E-03 | 0.60 | -1.68 |
| HYPK      | Huntingtin interacting protein K                                                 | 25764  | 233746_x_at  | 4.17E-03 | 0.60 | -1.68 |
| KCTD12    | potassium channel tetramerisation domain containing 12                           | 115207 | 212188_at    | 4.45E-02 | 0.60 | -1.68 |
| CALCOCO2  | calcium binding and coiled-coil domain 2                                         | 10241  | 210817_s_at  | 6.41E-03 | 0.60 | -1.68 |
| LYPLA1    | lysophospholipase I                                                              | 10434  | 203007_x_at  | 4.95E-03 | 0.60 | -1.68 |
| HDLBP     | high density lipoprotein binding protein (vigilin)                               | 3069   | 225012_at    | 8.07E-03 | 0.60 | -1.68 |
| C9orf125  | chromosome 9 open reading frame 125                                              | ---    | 213386_at    | 3.93E-04 | 0.60 | -1.68 |
| KIAA0232  | KIAA0232                                                                         | 9778   | 232366_at    | 1.57E-02 | 0.60 | -1.67 |
| GNB5      | guanine nucleotide binding protein (G protein), beta 5                           | 10681  | 204000_at    | 7.39E-03 | 0.60 | -1.67 |
| LOC645722 | hypothetical LOC645722                                                           | 645722 | 1555216_a_at | 3.17E-03 | 0.60 | -1.67 |
| BTBD11    | BTB (POZ) domain containing 11                                                   | 121551 | 238692_at    | 3.72E-04 | 0.60 | -1.67 |
| SPIN3     | spindlin family, member 3                                                        | 169981 | 1555883_s_at | 1.17E-03 | 0.60 | -1.67 |
| RBBP6     | retinoblastoma binding protein 6                                                 | 5930   | 1552329_at   | 6.73E-03 | 0.60 | -1.67 |
| GALNT1    | UDP-N-acetyl-alpha-D-galactosamine:polypeptide N-acetylgalactosaminyltransferase | 2589   | 201722_s_at  | 6.75E-04 | 0.60 | -1.66 |
| ERAP1     | Endoplasmic reticulum aminopeptidase 1                                           | 51752  | 212580_at    | 1.31E-02 | 0.60 | -1.66 |
| SETD8     | SET domain containing (lysine methyltransferase) 8                               | 387893 | 225094_at    | 7.14E-04 | 0.60 | -1.66 |
| PPM1F     | protein phosphatase 1F (PP2C domain containing)                                  | 9647   | 203063_at    | 2.05E-04 | 0.60 | -1.66 |
| VPS24     | vacuolar protein sorting 24 homolog (S. cerevisiae)                              | 51652  | 217837_s_at  | 1.64E-04 | 0.60 | -1.66 |
| WDR68     | WD repeat domain 68                                                              | 10238  | 224730_at    | 1.96E-02 | 0.60 | -1.66 |
| ---       | Transcribed locus                                                                | ---    | 214124_x_at  | 3.27E-03 | 0.60 | -1.66 |
| AKT2      | v-akt murine thymoma viral oncogene homolog 2                                    | 208    | 226156_at    | 6.57E-03 | 0.60 | -1.66 |
| SDHC      | succinate dehydrogenase complex, subunit C, integral membrane protein, 15kDa /// | 642502 | 216591_s_at  | 4.59E-02 | 0.60 | -1.66 |
| PSMD11    | proteasome (prosome, macropain) 26S subunit, non-ATPase, 11                      | 5717   | 208776_at    | 3.24E-02 | 0.60 | -1.65 |
| ---       | Transcribed locus                                                                | ---    | 242965_at    | 3.98E-02 | 0.60 | -1.65 |
| EGLN3     | egl nine homolog 3 (C. elegans)                                                  | 112399 | 219232_s_at  | 1.19E-02 | 0.61 | -1.65 |
| C3orf63   | chromosome 3 open reading frame 63                                               | 23272  | 209285_s_at  | 1.38E-02 | 0.61 | -1.65 |
| SGPL1     | sphingosine-1-phosphate lyase 1                                                  | ---    | 212321_at    | 9.69E-04 | 0.61 | -1.65 |
| ---       | CDNA FLJ13690 fis, clone PLACE2000097                                            | ---    | 232667_at    | 1.02E-04 | 0.61 | -1.65 |
| DYX1C1    | dyslexia susceptibility 1 candidate 1                                            | 161582 | 235273_at    | 2.75E-02 | 0.61 | -1.65 |
| BBS1      | Bardet-Biedl syndrome 1                                                          | 10072  | 218567_x_at  | 1.32E-02 | 0.61 | -1.65 |
| KCNJ12    | potassium inwardly-rectifying channel, subfamily J, member 12                    | 3768   | 208567_s_at  | 2.06E-03 | 0.61 | -1.65 |
| SDSL      | serine dehydratase-like                                                          | 113675 | 228274_at    | 1.77E-02 | 0.61 | -1.65 |
| KHDC1     | KH homology domain cont. 1                                                       | 387097 | 241024_at    | 1.75E-02 | 0.61 | -1.65 |
| ---       | CDNA clone IMAGE:6576427                                                         | ---    | 242423_x_at  | 1.14E-03 | 0.61 | -1.65 |
| PDLIM5    | PDZ and LIM domain 5                                                             | 10611  | 212412_at    | 8.09E-04 | 0.61 | -1.65 |
| TAF8      | TAF8 RNA polymerase II, TATA box binding protein (TBP)-associated factor, 43kDa  | 129685 | 1556176_at   | 7.31E-04 | 0.61 | -1.65 |
| SEPNI     | selenoprotein N, 1                                                               | 57190  | 224659_at    | 2.62E-02 | 0.61 | -1.65 |
| RAP2C     | RAP2C, member of RAS oncogene family                                             | 57826  | 218669_at    | 1.27E-02 | 0.61 | -1.65 |
| TOR1AIP1  | torsin A interacting protein 1                                                   | 26092  | 216100_s_at  | 6.09E-03 | 0.61 | -1.64 |
| KCTD16    | potassium channel tetramerisation domain containing 16                           | 57528  | 233234_at    | 2.64E-02 | 0.61 | -1.64 |
| ---       | CDNA FLJ13202 fis, clone NT2RP3004503                                            | ---    | 239050_s_at  | 4.52E-02 | 0.61 | -1.64 |
| RBM8A     | RNA binding motif protein 8A                                                     | 9939   | 213852_at    | 3.47E-03 | 0.61 | -1.64 |
| LOC650794 | Similar to FRAS1 related extracellular matrix protein 2                          | 650794 | 236837_x_at  | 3.93E-03 | 0.61 | -1.64 |

|           |                                                                                  |        |             |          |      |       |
|-----------|----------------------------------------------------------------------------------|--------|-------------|----------|------|-------|
| SIPA1L1   | Signal-induced proliferation-associated 1 like 1                                 | 26037  | 202254_at   | 4.40E-03 | 0.61 | -1.64 |
| CUGBP2    | CUG triplet repeat, RNA binding protein 2                                        | 10659  | 227178_at   | 3.31E-03 | 0.61 | -1.64 |
| RUNX3     | runt-related transcription factor 3                                              | 864    | 204197_s_at | 4.99E-03 | 0.61 | -1.64 |
| PCGF2     | polycomb group ring finger 2                                                     | 7703   | 214239_x_at | 2.26E-03 | 0.61 | -1.64 |
| ORAOV1    | oral cancer overexpressed 1                                                      | 220064 | 243531_at   | 1.02E-03 | 0.61 | -1.64 |
| CSNK1G1   | casein kinase 1, gamma 1                                                         | 53944  | 226888_at   | 4.17E-03 | 0.61 | -1.64 |
| SREBF2    | sterol regulatory element binding transcription factor 2                         | ---    | 201247_at   | 1.75E-02 | 0.61 | -1.64 |
| CCDC50    | coiled-coil domain containing 50                                                 | 152137 | 236831_at   | 1.13E-02 | 0.61 | -1.63 |
| PCBP2     | poly(rC) binding protein 2                                                       | 5094   | 213264_at   | 4.45E-03 | 0.61 | -1.63 |
| ---       | CDNA FLJ41633 fis, clone FCBBF3003435                                            | ---    | 238782_at   | 6.42E-03 | 0.61 | -1.63 |
| ELAVL1    | ELAV (embryonic lethal, abnormal vision, Drosophila)-like 1 (Hu antigen R)       | 1994   | 227746_at   | 6.11E-04 | 0.61 | -1.63 |
| HIST3H2A  | histone cluster 3, H2a                                                           | 92815  | 221582_at   | 6.42E-03 | 0.61 | -1.63 |
| RBM8A     | RNA binding motif protein 8A                                                     | 9939   | 217856_at   | 8.88E-03 | 0.61 | -1.63 |
| PKP4      | plakophilin 4                                                                    | 8502   | 214874_at   | 1.03E-04 | 0.61 | -1.63 |
| DCLK1     | doublecortin-like kinase 1                                                       | 9201   | 205399_at   | 1.50E-02 | 0.61 | -1.63 |
| MED19     | mediator complex subunit 19                                                      | 219541 | 226293_at   | 7.77E-04 | 0.61 | -1.63 |
| YIPF6     | Yip1 domain family, member 6                                                     | 286451 | 212342_at   | 2.19E-04 | 0.61 | -1.63 |
| ---       | CDNA FLJ13202 fis                                                                | ---    | 233068_at   | 1.24E-02 | 0.62 | -1.63 |
| STX4      | syntaxin 4                                                                       | 6810   | 229395_at   | 2.97E-04 | 0.62 | -1.63 |
| CNOT6     | CCR4-NOT transcription complex, subunit 6                                        | 57472  | 217970_s_at | 2.41E-04 | 0.62 | -1.62 |
| ---       | Transcribed locus                                                                | ---    | 228254_at   | 9.68E-03 | 0.62 | -1.62 |
| ---       | CDNA FLJ42287 fis, clone TLIVE2005866                                            | ---    | 235924_at   | 3.94E-03 | 0.62 | -1.62 |
| ---       | Transcribed locus                                                                | ---    | 230570_at   | 2.66E-03 | 0.62 | -1.62 |
| ---       | Transcribed locus                                                                | ---    | 242051_at   | 3.96E-02 | 0.62 | -1.62 |
| DAZAP2    | DAZ associated protein 2                                                         | 9802   | 200794_x_at | 7.14E-04 | 0.62 | -1.62 |
| FASTK     | Fas-activated serine/threonine kinase                                            | 10922  | 214114_x_at | 9.49E-04 | 0.62 | -1.62 |
| ---       | CDNA FLJ38461 fis, clone FEBRA2020977                                            | ---    | 243735_at   | 4.63E-02 | 0.62 | -1.62 |
| NNT       | nicotinamide nucleotide transhydrogenase                                         | 23530  | 202784_s_at | 1.03E-03 | 0.62 | -1.62 |
| LOC441453 | similar to olfactory receptor, family 7, subfamily A, member 17                  | 441453 | 217551_at   | 8.43E-03 | 0.62 | -1.62 |
| TAF11     | TAF11 RNA polymerase II, TATA box binding protein (TBP)-associated factor, 28kDa | 6882   | 209358_at   | 9.76E-04 | 0.62 | -1.62 |
| C8orf32   | chromosome 8 open reading frame 32                                               | 55093  | 219060_at   | 6.56E-03 | 0.62 | -1.62 |
| MIB2      | mindbomb homolog 2 (Drosophila)                                                  | 142678 | 226644_at   | 2.11E-03 | 0.62 | -1.62 |
| MEX3D     | mex-3 homolog D (C. elegans)                                                     | 399664 | 91816_f_at  | 8.20E-03 | 0.62 | -1.62 |
| TSPYL4    | TSPY-like 4                                                                      | 23270  | 212928_at   | 1.31E-02 | 0.62 | -1.62 |
| SOCS2     | suppressor of cytokine signaling 2                                               | 8835   | 203373_at   | 2.33E-03 | 0.62 | -1.62 |
| C18orf56  | chromosome 18 open reading frame 56                                              | 494514 | 228989_at   | 2.34E-02 | 0.62 | -1.62 |
| SRI       | sorcin                                                                           | 6717   | 208920_at   | 2.12E-03 | 0.62 | -1.62 |
| ---       | Transcribed locus                                                                | ---    | 241114_s_at | 4.75E-04 | 0.62 | -1.62 |
| TOB2      | transducer of ERBB2, 2                                                           | 10766  | 222243_s_at | 1.22E-02 | 0.62 | -1.62 |
| PFAS      | phosphoribosylformylglycinamide synthase (FGAR amidotransferase)                 | 5198   | 213302_at   | 7.66E-03 | 0.62 | -1.62 |
| LETM1     | Leucine zipper-EF-hand containing transmembrane protein 1                        | 3954   | 222006_at   | 4.71E-03 | 0.62 | -1.62 |
| TMCC1     | transmembrane and coiled-coil domain family 1                                    | 23023  | 213352_at   | 4.13E-02 | 0.62 | -1.62 |
| GJA1      | gap junction protein, alpha 1, 43kDa                                             | 2697   | 201667_at   | 4.27E-03 | 0.62 | -1.61 |
| KIAA1632  | KIAA1632                                                                         | 57724  | 228453_at   | 2.90E-02 | 0.62 | -1.61 |
| HINT3     | histidine triad nucleotide binding protein 3                                     | ---    | 228697_at   | 3.24E-02 | 0.62 | -1.61 |
| RAP2C     | RAP2C, member of RAS oncogene family                                             | 57826  | 218668_s_at | 1.42E-02 | 0.62 | -1.61 |
| LOC400027 | hypothetical gene supported by BC047417                                          | 400027 | 226413_at   | 2.53E-02 | 0.62 | -1.61 |
| EPPK1     | epiplakin 1                                                                      | 83481  | 208156_x_at | 4.43E-03 | 0.62 | -1.61 |
| BTBD2     | BTB (POZ) domain containing 2                                                    | 55643  | 207722_s_at | 3.59E-02 | 0.62 | -1.61 |
| ---       | Transcribed locus                                                                | ---    | 229029_at   | 2.46E-02 | 0.62 | -1.61 |
| TNFAIP8   | tumor necrosis factor, alpha-induced protein 8                                   | 25816  | 210260_s_at | 3.31E-04 | 0.62 | -1.61 |
| NNT       | nicotinamide nucleotide transhydrogenase                                         | 23530  | 202783_at   | 3.27E-04 | 0.62 | -1.61 |
| CROT      | carnitine O-octanoyltransferase                                                  | 54677  | 231102_at   | 5.00E-03 | 0.62 | -1.61 |
| PCSK6     | proprotein convertase subtilisin/kexin type 6                                    | 5046   | 207414_s_at | 7.68E-03 | 0.62 | -1.61 |
| C7orf41   | chromosome 7 open reading frame 41                                               | 222166 | 226018_at   | 3.89E-03 | 0.62 | -1.61 |
| KIAA0101  | KIAA0101                                                                         | 9768   | 202503_s_at | 4.89E-03 | 0.62 | -1.61 |
| MAPK14    | mitogen-activated protein kinase 14                                              | 1432   | 202530_at   | 5.15E-04 | 0.62 | -1.61 |
| C21orf51  | chromosome 21 open reading frame 51                                              | 54065  | 228239_at   | 3.63E-03 | 0.62 | -1.61 |
| TPR       | translocated promoter region (to activated MET oncogene)                         | 7175   | 228709_at   | 1.68E-03 | 0.62 | -1.61 |
| PIK3C2B   | phosphoinositide-3-kinase, class 2, beta polypeptide                             | 5287   | 204484_at   | 1.62E-04 | 0.62 | -1.60 |

|           |                                                                                   |        |              |          |      |       |
|-----------|-----------------------------------------------------------------------------------|--------|--------------|----------|------|-------|
| C16orf57  | chromosome 16 open reading frame 57                                               | 79650  | 1554016_a_at | 3.44E-03 | 0.62 | -1.60 |
| MED19     | mediator complex subunit 19                                                       | 219541 | 226300_at    | 5.36E-03 | 0.62 | -1.60 |
| FLJ11151  | hypothetical protein FLJ11151                                                     | 55313  | 218610_s_at  | 3.17E-02 | 0.63 | -1.60 |
| ---       | CDNA FLJ11723 fis, clone HEMBA1005314                                             | ---    | 227498_at    | 2.03E-02 | 0.63 | -1.60 |
| BUD13     | BUD13 homolog (S. cerevisiae)                                                     | 84811  | 224504_s_at  | 6.45E-04 | 0.63 | -1.60 |
| ---       | CDNA FLJ36977 fis, clone BRACE2006344                                             | ---    | 241808_at    | 5.79E-03 | 0.63 | -1.60 |
| PDCD6     | programmed cell death 6 /// aryl-hydrocarbon receptor repressor                   | 57491  | 229354_at    | 5.01E-03 | 0.63 | -1.60 |
| SH3KBP1   | SH3-domain kinase binding protein 1                                               | ---    | 235692_at    | 1.35E-02 | 0.63 | -1.60 |
| CRTAP     | cartilage associated protein                                                      | 10491  | 227138_at    | 7.76E-03 | 0.63 | -1.60 |
| MYADM     | myeloid-associated differentiation marker                                         | 91663  | 224920_x_at  | 1.25E-03 | 0.63 | -1.60 |
| PPP1R3E   | protein phosphatase 1, regulatory (inhibitor) subunit 3E                          | 90673  | 227412_at    | 1.75E-02 | 0.63 | -1.60 |
| SMAD6     | SMAD family member 6                                                              | 4091   | 207069_s_at  | 2.37E-02 | 0.63 | -1.60 |
| MALAT1    | metastasis associated lung adenocarcinoma transcript 1 (non-protein coding)       | 378938 | 224558_s_at  | 4.88E-02 | 0.63 | -1.59 |
| OSBPL3    | oxysterol binding protein-like 3                                                  | 26031  | 209627_s_at  | 1.25E-02 | 0.63 | -1.59 |
| EXT2      | exostosins (multiple) 2                                                           | 2132   | 202013_s_at  | 1.19E-03 | 0.63 | -1.59 |
| IFI44     | interferon-induced protein 44                                                     | 10561  | 214453_s_at  | 4.21E-02 | 0.63 | -1.59 |
| HAS2      | Hyaluronan synthase 2                                                             | ---    | 230372_at    | 1.60E-02 | 0.63 | -1.59 |
| NADSYN1   | NAD synthetase 1                                                                  | 55191  | 232946_s_at  | 1.64E-03 | 0.63 | -1.59 |
| METAP1    | methionyl aminopeptidase 1                                                        | 23173  | 212673_at    | 1.02E-03 | 0.63 | -1.59 |
| MAGED2    | melanoma antigen family D, 2                                                      | 10916  | 213627_at    | 4.42E-03 | 0.63 | -1.59 |
| USP49     | ubiquitin specific peptidase 49                                                   | ---    | 229351_at    | 4.17E-02 | 0.63 | -1.59 |
| TSEN34    | tRNA splicing endonuclease 34 homolog (S. cerevisiae)                             | 79042  | 218132_s_at  | 2.76E-03 | 0.63 | -1.59 |
| LNPEP     | leucyl/cystinyl aminopeptidase                                                    | 4012   | 236728_at    | 1.49E-02 | 0.63 | -1.59 |
| MAML1     | mastermind-like 1 (Drosophila)                                                    | 9794   | 202360_at    | 3.72E-04 | 0.63 | -1.59 |
| LOC284356 | hypothetical LOC284356                                                            | 284356 | 1555842_at   | 2.60E-03 | 0.63 | -1.59 |
| LOC285535 | hypothetical protein LOC285535                                                    | 285535 | 229130_at    | 2.89E-03 | 0.63 | -1.59 |
| WDR68     | WD repeat domain 68                                                               | 10238  | 221745_at    | 4.35E-02 | 0.63 | -1.58 |
| KLHL24    | kelch-like 24 (Drosophila)                                                        | 54800  | 226158_at    | 4.08E-02 | 0.63 | -1.58 |
| FERMT1    | fermitin family homolog 1 (Drosophila)                                            | 55612  | 218796_at    | 1.09E-02 | 0.63 | -1.58 |
| ---       | CDNA clone IMAGE:5301910                                                          | ---    | 239503_at    | 6.96E-03 | 0.63 | -1.58 |
| DUSP6     | dual specificity phosphatase 6                                                    | 1848   | 208891_at    | 2.36E-02 | 0.63 | -1.58 |
| ---       | Transcribed locus                                                                 | ---    | 239236_at    | 3.47E-02 | 0.63 | -1.58 |
| SPRYD4    | SPRY domain containing 4                                                          | 283377 | 225616_at    | 2.53E-03 | 0.63 | -1.58 |
| SOX9      | SRY (sex determining region Y)-box 9 (campomelic dysplasia, autosomal sex-revers) | 6662   | 202936_s_at  | 3.47E-04 | 0.63 | -1.58 |
| TCEA2     | transcription elongation factor A (SII), 2                                        | 6919   | 203919_at    | 4.03E-02 | 0.63 | -1.58 |
| SETD8     | SET domain containing (lysine methyltransferase) 8                                | 387893 | 225118_at    | 2.33E-04 | 0.63 | -1.58 |
| UNQ1887   | signal peptide peptidase 3                                                        | 121665 | 224639_at    | 3.72E-03 | 0.63 | -1.58 |
| LIMK1     | LIM domain kinase 1                                                               | 3984   | 204357_s_at  | 9.96E-03 | 0.63 | -1.58 |
| FAM126B   | family with sequence similarity 126, member B                                     | 285172 | 1554178_a_at | 1.92E-02 | 0.63 | -1.58 |
| ---       | MRNA full length insert cDNA clone EUROIMAGE 1674211                              | ---    | 225543_at    | 7.96E-04 | 0.63 | -1.58 |
| ---       | CDNA: FLJ22542 fis, clone HSI00196                                                | ---    | 233820_at    | 9.62E-03 | 0.63 | -1.58 |
| PSME3     | proteasome (prosome, macropain) activator subunit 3 (PA28 gamma; Ki)              | 10197  | 200988_s_at  | 2.28E-02 | 0.63 | -1.58 |
| BACE1     | beta-site APP-cleaving enzyme 1                                                   | 23621  | 217904_s_at  | 1.61E-03 | 0.64 | -1.57 |
| NADSYN1   | NAD synthetase 1                                                                  | 55191  | 218840_s_at  | 7.44E-03 | 0.64 | -1.57 |
| TPK1      | thiamin pyrophosphokinase 1                                                       | 27010  | 223686_at    | 8.47E-03 | 0.64 | -1.57 |
| TIMM17B   | translocase of inner mitochondrial membrane 17 homolog B (yeast)                  | 10245  | 203342_at    | 2.48E-03 | 0.64 | -1.57 |
| FAM101B   | family with sequence similarity 101, member B                                     | 359845 | 226905_at    | 7.72E-03 | 0.64 | -1.57 |
| OPN3      | opsin 3                                                                           | 23596  | 224392_s_at  | 1.77E-02 | 0.64 | -1.57 |
| SRD5A1    | steroid-5-alpha-reductase, alpha polypeptide 1 (3-oxo-5 alpha-steroid delta 4-de  | 6715   | 211056_s_at  | 2.48E-03 | 0.64 | -1.57 |
| ACTR8     | ARP8 actin-related protein 8 homolog (yeast)                                      | 93973  | 218658_s_at  | 3.03E-03 | 0.64 | -1.57 |
| DOCK5     | Dedicator of cytokinesis 5                                                        | 80005  | 230207_s_at  | 3.28E-02 | 0.64 | -1.57 |
| NKX2-2    | NK2 homeobox 2                                                                    | 4821   | 206915_at    | 4.69E-03 | 0.64 | -1.57 |
| MGC5566   | Hypothetical protein LOC100128040                                                 | 79015  | 241759_at    | 4.57E-03 | 0.64 | -1.57 |
| DPY19L1   | dpy-19-like 1 (C. elegans)                                                        | 23333  | 212792_at    | 3.65E-03 | 0.64 | -1.57 |
| FOXA1     | forkhead box A1                                                                   | 3169   | 204667_at    | 2.39E-02 | 0.64 | -1.57 |
| NPTX1     | neuronal pentraxin 1                                                              | 4884   | 204684_at    | 2.88E-02 | 0.64 | -1.57 |
| PER2      | period homolog 2 (Drosophila)                                                     | 8864   | 205251_at    | 7.51E-03 | 0.64 | -1.57 |
| CDCA4     | cell division cycle associated 4                                                  | 55038  | 218399_s_at  | 1.82E-03 | 0.64 | -1.57 |
| ---       | CDNA FLJ30340 fis, clone BRACE2007411                                             | ---    | 226458_at    | 3.16E-03 | 0.64 | -1.57 |
| TFAP2A    | transcription factor AP-2 alpha (activating enhancer binding protein 2 alpha)     | 7020   | 204654_s_at  | 5.95E-03 | 0.64 | -1.57 |

|           |                                                                                  |        |              |          |      |       |
|-----------|----------------------------------------------------------------------------------|--------|--------------|----------|------|-------|
| C9orf116  | chromosome 9 open reading frame 116                                              | 138162 | 221946_at    | 1.28E-02 | 0.64 | -1.56 |
| CPSF4     | cleavage and polyadenylation specific factor 4, 30kDa                            | 10898  | 206688_s_at  | 3.80E-03 | 0.64 | -1.56 |
| ZNF512    | zinc finger protein 512                                                          | 84450  | 1553218_a_at | 1.56E-03 | 0.64 | -1.56 |
| BID       | BH3 interacting domain death agonist                                             | 637    | 204493_at    | 3.86E-02 | 0.64 | -1.56 |
| HIST1H2BG | histone cluster 1, H2bg                                                          | 8344   | 208527_x_at  | 5.87E-03 | 0.64 | -1.56 |
| HIST1H2BG | histone cluster 1, H2bg                                                          | 8343   | 208490_x_at  | 4.93E-03 | 0.64 | -1.56 |
| SAR1A     | SAR1 gene homolog A                                                              | 56681  | 210790_s_at  | 9.95E-03 | 0.64 | -1.56 |
| ---       | ---                                                                              | ---    | 227943_at    | 2.57E-02 | 0.64 | -1.56 |
| FLJ37453  | hypothetical protein LOC729614                                                   | 729614 | 227593_at    | 2.25E-02 | 0.64 | -1.56 |
| GALNT4    | UDP-N-acetyl-alpha-D-galactosamine:polypeptide N-acetylgalactosaminyltransferase | 8693   | 231832_at    | 1.37E-02 | 0.64 | -1.56 |
| CAMK2D    | calcium/calmodulin-dependent protein kinase (CaM kinase) II delta                | 817    | 231793_s_at  | 2.04E-03 | 0.64 | -1.56 |
| ---       | CDNA clone IMAGE:6576427                                                         | ---    | 238109_at    | 2.03E-03 | 0.64 | -1.56 |
| ALDH7A1   | aldehyde dehydrogenase 7 family, member A1                                       | 501    | 213591_at    | 1.29E-04 | 0.64 | -1.56 |
| SOCS2     | suppressor of cytokine signaling 2                                               | 8835   | 203372_s_at  | 2.89E-02 | 0.64 | -1.56 |
| MGC4172   | short-chain dehydrogenase/reductase                                              | 79154  | 218756_s_at  | 2.86E-02 | 0.64 | -1.56 |
| FLJ44896  | FLJ44896 protein                                                                 | 401166 | 236046_at    | 3.05E-02 | 0.64 | -1.56 |
| HOXA3     | homeobox A3                                                                      | 3200   | 235521_at    | 1.53E-03 | 0.64 | -1.56 |
| CNOT6     | CCR4-NOT transcription complex, subunit 6                                        | 57472  | 222476_at    | 3.83E-04 | 0.64 | -1.56 |
| ---       | Clone 24583 mRNA sequence                                                        | ---    | 213686_at    | 1.29E-02 | 0.64 | -1.56 |
| DAZAP2    | DAZ associated protein 2                                                         | 9802   | 214334_x_at  | 1.55E-03 | 0.64 | -1.56 |
| TFAP2A    | transcription factor AP-2 alpha (activating enhancer binding protein 2 alpha)    | 7020   | 204653_at    | 6.79E-05 | 0.64 | -1.56 |
| SETD8     | SET domain containing (lysine methyltransferase) 8                               | 387893 | 220200_s_at  | 6.53E-04 | 0.64 | -1.56 |
| TOR1AIP1  | torsin A interacting protein 1                                                   | 26092  | 212408_at    | 3.80E-03 | 0.64 | -1.56 |
| HGSNAT    | heparan-alpha-glucosaminide N-acetyltransferase                                  | 138050 | 227564_at    | 7.30E-03 | 0.64 | -1.55 |
| CYB5B     | cytochrome b5 type B (outer mitochondrial membrane)                              | 80777  | 238554_at    | 1.64E-04 | 0.64 | -1.55 |
| ---       | Transcribed locus                                                                | ---    | 241950_at    | 2.84E-02 | 0.64 | -1.55 |
| FAM134A   | family with sequence similarity 134, member A                                    | 79137  | 218037_at    | 3.09E-03 | 0.64 | -1.55 |
| RNFT2     | ring finger protein, transmembrane 2                                             | 84900  | 221908_at    | 6.05E-03 | 0.64 | -1.55 |
| NBPF1     | neuroblastoma breakpoint family, member 1                                        | 55672  | 236273_at    | 2.19E-03 | 0.64 | -1.55 |
| TUB       | tubby homolog (mouse)                                                            | 7275   | 228882_at    | 2.29E-02 | 0.64 | -1.55 |
| FLJ14213  | protor-2                                                                         | 79899  | 219383_at    | 1.28E-03 | 0.64 | -1.55 |
| HPS3      | Hermansky-Pudlak syndrome 3                                                      | 84343  | 231121_at    | 1.06E-02 | 0.64 | -1.55 |
| PHLPL     | PH domain and leucine rich repeat protein phosphatase-like                       | 23035  | 213407_at    | 3.13E-02 | 0.65 | -1.55 |
| ZFP36L1   | zinc finger protein 36, C3H type-like 1                                          | 677    | 211965_at    | 1.04E-02 | 0.65 | -1.55 |
| BID       | BH3 interacting domain death agonist                                             | 637    | 227143_s_at  | 1.20E-02 | 0.65 | -1.55 |
| PCGF2     | polycomb group ring finger 2                                                     | 7703   | 213551_x_at  | 1.86E-03 | 0.65 | -1.55 |
| C1orf151  | chromosome 1 open reading frame 151                                              | 440574 | 228096_at    | 7.42E-03 | 0.65 | -1.55 |
| GNG12     | guanine nucleotide binding protein (G protein), gamma 12                         | 55970  | 222834_s_at  | 3.38E-02 | 0.65 | -1.55 |
| C9orf125  | chromosome 9 open reading frame 125                                              | 84302  | 224458_at    | 2.27E-03 | 0.65 | -1.55 |
| PDLIM5    | PDZ and LIM domain 5                                                             | 10611  | 203243_s_at  | 1.07E-02 | 0.65 | -1.55 |
| CAMK2D    | calcium/calmodulin-dependent protein kinase (CaM kinase) II delta                | 817    | 228555_at    | 2.64E-02 | 0.65 | -1.55 |
| LOC728769 | hypothetical protein LOC728769                                                   | 728769 | 238039_at    | 4.70E-03 | 0.65 | -1.55 |
| PNPLA4    | patatin-like phospholipase domain containing 4                                   | 8228   | 209740_s_at  | 3.53E-03 | 0.65 | -1.55 |
| IFNAR2    | interferon (alpha, beta and omega) receptor 2                                    | 3455   | 204786_s_at  | 6.35E-03 | 0.65 | -1.55 |
| FAM64A    | family with sequence similarity 64, member A                                     | 54478  | 221591_s_at  | 1.35E-02 | 0.65 | -1.55 |
| ---       | MRNA full length insert cDNA clone EUROIMAGE 898037                              | 677778 | 228930_at    | 3.57E-02 | 0.65 | -1.54 |
| PHLDA1    | pleckstrin homology-like domain, family A, member 1                              | 22822  | 217996_at    | 4.78E-02 | 0.65 | -1.54 |
| SFRS14    | Splicing factor, arginine/serine-rich 14                                         | 10147  | 212001_at    | 3.33E-02 | 0.65 | -1.54 |
| BACH2     | BTB and CNC homology 1, basic leucine zipper transcription factor 2              | 60468  | 221234_s_at  | 1.02E-02 | 0.65 | -1.54 |
| RUNX3     | runt-related transcription factor 3                                              | 864    | 204198_s_at  | 2.26E-02 | 0.65 | -1.54 |
| MAD2L1BP  | MAD2L1 binding protein                                                           | 9587   | 203094_at    | 1.65E-04 | 0.65 | -1.54 |
| ---       | Transcribed locus                                                                | ---    | 225356_at    | 1.27E-03 | 0.65 | -1.54 |
| N4BP1     | NEDD4 binding protein 1                                                          | 9683   | 221867_at    | 1.50E-02 | 0.65 | -1.54 |
| ---       | Transcribed locus                                                                | ---    | 235888_at    | 9.48E-04 | 0.65 | -1.54 |
| HDLBP     | high density lipoprotein binding protein (vigilin)                               | 3069   | 222916_s_at  | 4.81E-03 | 0.65 | -1.54 |
| SLC36A1   | solute carrier family 36 (proton/amino acid symporter), member 1                 | 206358 | 213119_at    | 5.41E-03 | 0.65 | -1.54 |
| MOBKL1B   | MOB1, Mps One Binder kinase activator-like 1B (yeast)                            | 55233  | 214812_s_at  | 4.03E-03 | 0.65 | -1.54 |
| IKZF4     | IKAROS family zinc finger 4 (Eos)                                                | 64375  | 226759_at    | 3.36E-04 | 0.65 | -1.54 |
| BFSP1     | beaded filament structural protein 1, filensin                                   | 631    | 206746_at    | 1.23E-02 | 0.65 | -1.54 |
| LYPLA1    | lysophospholipase I                                                              | 10434  | 212449_s_at  | 5.33E-03 | 0.65 | -1.54 |

|              |                                                                                 |        |              |          |      |       |
|--------------|---------------------------------------------------------------------------------|--------|--------------|----------|------|-------|
| BCL7A        | B-cell CLL/lymphoma 7A                                                          | 605    | 203795_s_at  | 1.40E-03 | 0.65 | -1.54 |
| FERMT1       | fermitin family homolog 1 (Drosophila)                                          | 55612  | 60474_at     | 2.25E-03 | 0.65 | -1.54 |
| RAB40B       | RAB40B, member RAS oncogene family                                              | 10966  | 204547_at    | 9.09E-04 | 0.65 | -1.54 |
| RWDD4A       | RWD domain containing 4A                                                        | 201965 | 225574_at    | 9.42E-04 | 0.65 | -1.54 |
| ZNF185       | zinc finger protein 185 (LIM domain)                                            | 7739   | 203585_at    | 2.33E-02 | 0.65 | -1.54 |
| IQCG         | IQ motif containing G                                                           | 84223  | 221185_s_at  | 6.00E-03 | 0.65 | -1.54 |
| SLC16A9      | solute carrier family 16, member 9 (monocarboxylic acid transporter 9)          | 220963 | 227506_at    | 1.58E-03 | 0.65 | -1.54 |
| LOC388272    | similar to RIKEN cDNA 4921524J17                                                | 388272 | 226608_at    | 4.14E-03 | 0.65 | -1.53 |
| PPIA         | peptidylprolyl isomerase A (cyclophilin A)                                      | 5478   | 226336_at    | 2.68E-03 | 0.65 | -1.53 |
| IGF1R        | insulin-like growth factor 1 receptor                                           | 3480   | 225330_at    | 2.66E-02 | 0.65 | -1.53 |
| DUSP6        | dual specificity phosphatase 6                                                  | 1848   | 208893_s_at  | 2.42E-02 | 0.65 | -1.53 |
| ---          | Transcribed locus                                                               | ---    | 228955_at    | 2.30E-02 | 0.65 | -1.53 |
| NAV1         | neuron navigator 1                                                              | 89796  | 227584_at    | 4.76E-02 | 0.65 | -1.53 |
| TRIP13       | thyroid hormone receptor interactor 13                                          | 9319   | 204033_at    | 4.26E-03 | 0.65 | -1.53 |
| C20orf11     | chromosome 20 open reading frame 11                                             | 54994  | 225376_at    | 5.69E-03 | 0.65 | -1.53 |
| ATP5G2       | ATP synthase, H+ transporting, mitochondrial F0 complex, subunit C2 (subunit 9) | 517    | 208764_s_at  | 1.77E-03 | 0.65 | -1.53 |
| ETS2         | v-ets erythroblastosis virus E26 oncogene homolog 2 (avian)                     | 2114   | 201328_at    | 1.09E-03 | 0.65 | -1.53 |
| BBS1         | Bardet-Biedl syndrome 1                                                         | 10072  | 232510_s_at  | 2.65E-02 | 0.65 | -1.53 |
| ARHGEF9      | Cdc42 guanine nucleotide exchange factor (GEF) 9                                | 23229  | 203264_s_at  | 7.34E-03 | 0.65 | -1.53 |
| DOCK5        | Dedicator of cytokinesis 5                                                      | 80005  | 230263_s_at  | 3.70E-02 | 0.65 | -1.53 |
| LOC100131989 | hypothetical LOC100131989                                                       | ---    | 235360_at    | 3.88E-03 | 0.65 | -1.53 |
| FLOT2        | flotillin 2                                                                     | 2319   | 211299_s_at  | 9.55E-03 | 0.65 | -1.53 |
| JPH2         | junctophilin 2                                                                  | 57158  | 229578_at    | 3.13E-02 | 0.66 | -1.53 |
| ---          | Transcribed locus                                                               | ---    | 241726_at    | 2.13E-02 | 0.66 | -1.53 |
| DTX3L        | deltex 3-like (Drosophila)                                                      | 151636 | 225415_at    | 1.79E-03 | 0.66 | -1.53 |
| C14orf145    | chromosome 14 open reading frame 145                                            | 145508 | 1557756_a_at | 1.77E-02 | 0.66 | -1.53 |
| AACS         | acetoacetyl-CoA synthetase                                                      | 65985  | 218434_s_at  | 1.81E-04 | 0.66 | -1.53 |
| ---          | Transcribed locus                                                               | ---    | 241815_at    | 1.56E-03 | 0.66 | -1.53 |
| FRMD8        | FERM domain containing 8                                                        | 83786  | 227964_at    | 3.13E-03 | 0.66 | -1.52 |
| DAZAP2       | DAZ associated protein 2                                                        | 9802   | 212595_s_at  | 1.73E-02 | 0.66 | -1.52 |
| HNT          | neurotrimin                                                                     | 50863  | 227566_at    | 3.43E-02 | 0.66 | -1.52 |
| LOC25845     | hypothetical LOC25845                                                           | 25845  | 225458_at    | 3.80E-02 | 0.66 | -1.52 |
| LOC388272    | Similar to RIKEN cDNA 4921524J17                                                | 388272 | 242555_at    | 1.48E-02 | 0.66 | -1.52 |
| CARHSP1      | calcium regulated heat stable protein 1, 24kDa                                  | 23589  | 224910_at    | 9.59E-03 | 0.66 | -1.52 |
| CNPY3        | canopy 3 homolog (zebrafish)                                                    | 10695  | 1556389_at   | 3.22E-02 | 0.66 | -1.52 |
| ---          | Transcribed locus                                                               | ---    | 239058_at    | 6.43E-04 | 0.66 | -1.52 |
| UBP1         | upstream binding protein 1 (LBP-1a)                                             | 7342   | 218082_s_at  | 5.23E-03 | 0.66 | -1.52 |
| CANX         | calnexin                                                                        | 821    | 238034_at    | 1.21E-02 | 0.66 | -1.52 |
| ALS2CR2      | amyotrophic lateral sclerosis 2 (juvenile) chromosome region, candidate 2       | 55437  | 223266_at    | 6.40E-04 | 0.66 | -1.52 |
| LASS2        | LAG1 homolog, ceramide synthase 2                                               | 29956  | 222212_s_at  | 1.26E-03 | 0.66 | -1.52 |
| LMNB2        | lamin B2                                                                        | 84823  | 216952_s_at  | 3.83E-03 | 0.66 | -1.52 |
| C3orf64      | chromosome 3 open reading frame 64                                              | 285203 | 221935_s_at  | 1.70E-02 | 0.66 | -1.52 |
| IGSF3        | immunoglobulin superfamily, member 3                                            | 3321   | 202421_at    | 3.39E-02 | 0.66 | -1.52 |
| GBP1         | guanylate binding protein 1, interferon-inducible, 67kDa                        | 2633   | 231577_s_at  | 4.69E-03 | 0.66 | -1.52 |
| LOC729446    | hypothetical LOC729446                                                          | 729446 | 238043_at    | 4.63E-03 | 0.66 | -1.52 |
| TNFAIP8      | tumor necrosis factor, alpha-induced protein 8                                  | 25816  | 208296_x_at  | 1.18E-03 | 0.66 | -1.52 |
| FLOT2        | flotillin 2                                                                     | 2319   | 201350_at    | 6.75E-04 | 0.66 | -1.52 |
| EIF2AK4      | eukaryotic translation initiation factor 2 alpha kinase 4                       | 440275 | 237145_at    | 5.84E-03 | 0.66 | -1.52 |
| STAM2        | Signal transducing adaptor molecule (SH3 domain and ITAM motif) 2               | 10254  | 242569_at    | 3.69E-02 | 0.66 | -1.52 |
| ---          | Transcribed locus                                                               | ---    | 235015_at    | 4.42E-03 | 0.66 | -1.52 |
| IQCK         | IQ motif containing K                                                           | 124152 | 213392_at    | 6.97E-03 | 0.66 | -1.52 |
| CAMK2D       | calcium/calmodulin-dependent protein kinase (CaM kinase) II delta               | 817    | 224994_at    | 3.55E-02 | 0.66 | -1.52 |
| ZNF599       | zinc finger protein 599                                                         | 148103 | 243747_at    | 5.58E-04 | 0.66 | -1.52 |
| ---          | Transcribed locus                                                               | ---    | 235581_at    | 2.93E-02 | 0.66 | -1.52 |
| SDC1         | syndecan 1                                                                      | 6382   | 201286_at    | 4.09E-03 | 0.66 | -1.52 |
| POLI         | polymerase (DNA directed) iota                                                  | 11201  | 238992_at    | 4.59E-02 | 0.66 | -1.52 |
| KIAA0265     | KIAA0265 protein                                                                | 23008  | 209255_at    | 4.55E-03 | 0.66 | -1.52 |
| COL4A4       | collagen, type IV, alpha 4                                                      | 1286   | 214602_at    | 2.22E-02 | 0.66 | -1.52 |
| OSBPL6       | oxysterol binding protein-like 6                                                | ---    | 236261_at    | 2.59E-02 | 0.66 | -1.51 |

|              |                                                                                  |        |              |          |      |       |
|--------------|----------------------------------------------------------------------------------|--------|--------------|----------|------|-------|
| ---          | Transcribed locus                                                                | ---    | 230795_at    | 5.83E-05 | 0.66 | -1.51 |
| RAB38        | RAB38, member RAS oncogene family                                                | 23682  | 219412_at    | 1.11E-02 | 0.66 | -1.51 |
| RFC3         | replication factor C (activator 1) 3, 38kDa                                      | 5983   | 204127_at    | 5.15E-03 | 0.66 | -1.51 |
| HIST1H2BH    | histone cluster 1, H2bh                                                          | 8345   | 208546_x_at  | 3.56E-03 | 0.66 | -1.51 |
| ABT1         | activator of basal transcription 1                                               | 29777  | 218405_at    | 4.10E-03 | 0.66 | -1.51 |
| HIST1H2AE    | histone cluster 1, H2ab                                                          | 3012   | 214469_at    | 9.90E-03 | 0.66 | -1.51 |
| SLMAP        | sarcolemma associated protein                                                    | 7871   | 222924_at    | 1.80E-03 | 0.66 | -1.51 |
| ZNRF1        | zinc and ring finger 1                                                           | 84937  | 225962_at    | 1.84E-02 | 0.66 | -1.51 |
| PACS1        | phosphofurin acidic cluster sorting protein 1                                    | 55690  | 224658_x_at  | 1.55E-02 | 0.66 | -1.51 |
| PAPPA        | pregnancy-associated plasma protein A, pappalysin 1                              | 5069   | 228128_x_at  | 1.75E-02 | 0.66 | -1.51 |
| ISG15        | ISG15 ubiquitin-like modifier                                                    | 9636   | 205483_s_at  | 7.25E-03 | 0.66 | -1.51 |
| PYGL         | phosphorylase, glycogen; liver (Hers disease, glycogen storage disease type VI)  | 5836   | 202990_at    | 1.91E-03 | 0.66 | -1.51 |
| IGF1R        | insulin-like growth factor 1 receptor                                            | 3480   | 203628_at    | 2.67E-02 | 0.66 | -1.51 |
| FZD6         | frizzled homolog 6 (Drosophila)                                                  | 8323   | 203987_at    | 1.35E-02 | 0.66 | -1.51 |
| NETO2        | neuroligin (NRP) and tolloid (TLL)-like 2                                        | 81831  | 218888_s_at  | 8.16E-03 | 0.66 | -1.51 |
| LOC100130536 | hypothetical protein LOC100130536                                                | 80863  | 230054_at    | 4.21E-02 | 0.66 | -1.51 |
| TEF          | thyrotrophic embryonic factor                                                    | 7008   | 225840_at    | 2.79E-03 | 0.66 | -1.51 |
| TMEM173      | transmembrane protein 173                                                        | 340061 | 224929_at    | 1.12E-02 | 0.66 | -1.51 |
| ---          | CDNA: FLJ23454 fis, clone HSI06959                                               | ---    | 232331_at    | 1.66E-02 | 0.66 | -1.51 |
| ---          | Transcribed locus                                                                | ---    | 243023_at    | 3.43E-02 | 0.66 | -1.51 |
| WDR19        | WD repeat domain 19                                                              | 57728  | 232163_at    | 1.16E-02 | 0.66 | -1.51 |
| PPM1F        | protein phosphatase 1F (PP2C domain containing)                                  | 9647   | 37384_at     | 2.42E-06 | 0.66 | -1.51 |
| FAF1         | Fas (TNFRSF6) associated factor 1                                                | 11124  | 239749_at    | 2.16E-02 | 0.66 | -1.51 |
| NADK         | NAD kinase                                                                       | 65220  | 208919_s_at  | 7.92E-04 | 0.66 | -1.51 |
| PAICS        | phosphoribosylaminoimidazole carboxylase, phosphoribosylaminoimidazole succinoca | 10606  | 201013_s_at  | 4.72E-03 | 0.66 | -1.51 |
| GNA11        | guanine nucleotide binding protein (G protein), alpha 11 (Gq class)              | 2767   | 214679_x_at  | 1.35E-04 | 0.66 | -1.51 |
| Gcom1        | glutamate receptor, ionotropic, N-methyl D-aspartate-like 1A                     | 145781 | 228568_at    | 2.59E-02 | 0.66 | -1.51 |
| ---          | Transcribed locus                                                                | ---    | 238656_at    | 4.13E-02 | 0.66 | -1.51 |
| RGMB         | RGM domain family, member B                                                      | 285704 | 227340_s_at  | 1.89E-02 | 0.66 | -1.51 |
| ---          | CDNA clone IMAGE:4798227                                                         | ---    | 242086_at    | 3.26E-04 | 0.66 | -1.51 |
| FASTK        | Fas-activated serine/threonine kinase                                            | 10922  | 202676_x_at  | 2.52E-06 | 0.66 | -1.51 |
| ---          | CDNA FLJ33148 fis, clone UTERU2000238                                            | ---    | 238492_at    | 5.71E-04 | 0.66 | -1.51 |
| CALCOCO2     | calcium binding and coiled-coil domain 2                                         | 10241  | 235076_at    | 7.87E-03 | 0.66 | -1.51 |
| C3orf10      | chromosome 3 open reading frame 10                                               | 55845  | 224023_s_at  | 1.50E-03 | 0.66 | -1.51 |
| VPS36        | vacuolar protein sorting 36 homolog (S. cerevisiae)                              | 51028  | 222478_at    | 2.30E-03 | 0.66 | -1.50 |
| SMC1A        | structural maintenance of chromosomes 1A                                         | 8243   | 217555_at    | 9.54E-03 | 0.66 | -1.50 |
| ---          | CDNA FLJ34018 fis, clone FCBBF2002801                                            | ---    | 225896_at    | 2.32E-02 | 0.66 | -1.50 |
| ---          | CDNA clone IMAGE:5500261                                                         | ---    | 227665_at    | 1.35E-02 | 0.66 | -1.50 |
| LOC158402    | hypothetical protein LOC158402                                                   | 158402 | 236769_at    | 1.57E-03 | 0.66 | -1.50 |
| ---          | CDNA FLJ33355 fis, clone BRACE2005151                                            | ---    | 242389_at    | 3.27E-02 | 0.67 | -1.50 |
| STOX1        | storkhead box 1                                                                  | 219736 | 229378_at    | 9.22E-04 | 0.67 | -1.50 |
| ARIH2        | ariadne homolog 2 (Drosophila)                                                   | 10425  | 227932_at    | 9.60E-04 | 0.67 | -1.50 |
| PRDM16       | PR domain containing 16                                                          | 63976  | 232424_at    | 6.72E-03 | 0.67 | -1.50 |
| PSTPIP2      | proline-serine-threonine phosphatase interacting protein 2                       | 9050   | 219938_s_at  | 1.83E-03 | 0.67 | -1.50 |
| BCAN         | brevican                                                                         | 63827  | 223632_s_at  | 1.20E-02 | 0.67 | -1.50 |
| ---          | CDNA FLJ33407 fis, clone BRACE2010535                                            | ---    | 205316_at    | 5.87E-03 | 0.67 | -1.50 |
| COL21A1      | collagen, type XXI, alpha 1                                                      | 81578  | 208096_s_at  | 3.32E-03 | 1.50 | 1.50  |
| ---          | CDNA clone IMAGE:5298411                                                         | ---    | 232242_at    | 5.60E-02 | 1.50 | 1.50  |
| COPS8        | COP9 constitutive photomorphogenic homolog subunit 8 (Arabidopsis)               | 10920  | 214260_at    | 6.28E-02 | 1.51 | 1.51  |
| STK38L       | serine/threonine kinase 38 like                                                  | 23012  | 212572_at    | 7.16E-02 | 1.51 | 1.51  |
| MAP2K6       | mitogen-activated protein kinase kinase 6                                        | 5608   | 205699_at    | 3.36E-02 | 1.51 | 1.51  |
| AP1S3        | adaptor-related protein complex 1, sigma 3 subunit                               | 130340 | 1555731_a_at | 2.77E-01 | 1.51 | 1.51  |
| RBM47        | RNA binding motif protein 47                                                     | 54502  | 218035_s_at  | 3.76E-02 | 1.51 | 1.51  |
| CSNK1A1      | casein kinase 1, alpha 1                                                         | 1452   | 206562_s_at  | 1.86E-02 | 1.51 | 1.51  |
| MCAM         | melanoma cell adhesion molecule                                                  | 4162   | 209087_x_at  | 1.91E-03 | 1.51 | 1.51  |
| DCBLD1       | discoidin, CUB and LCCL domain containing 1                                      | 285761 | 226609_at    | 6.47E-02 | 1.51 | 1.51  |
| SPTLC1       | serine palmitoyltransferase, long chain base subunit 1                           | 10558  | 202277_at    | 2.31E-04 | 1.51 | 1.51  |
| ---          | Transcribed locus                                                                | ---    | 241404_at    | 1.24E-01 | 1.51 | 1.51  |
| RHEB         | Ras homolog enriched in brain                                                    | 6009   | 201453_x_at  | 3.10E-02 | 1.52 | 1.52  |



|           |                                                                      |        |              |          |      |      |
|-----------|----------------------------------------------------------------------|--------|--------------|----------|------|------|
| RCAN2     | regulator of calcineurin 2                                           | 10231  | 203498_at    | 1.94E-03 | 1.52 | 1.52 |
| TMEM65    | transmembrane protein 65                                             | 157378 | 241342_at    | 3.18E-03 | 1.52 | 1.52 |
| CLIP4     | CAP-GLY domain containing linker protein family, member 4            | 79745  | 226425_at    | 4.65E-02 | 1.52 | 1.52 |
| FAM18B    | family with sequence similarity 18, member B                         | 51030  | 218446_s_at  | 1.29E-05 | 1.52 | 1.52 |
| PCGF5     | polycomb group ring finger 5                                         | 84333  | 229194_at    | 2.48E-02 | 1.52 | 1.52 |
| ANKRD40   | ankyrin repeat domain 40                                             | 91369  | 227064_at    | 6.71E-03 | 1.52 | 1.52 |
| MANEA     | mannosidase, endo-alpha                                              | 79694  | 219003_s_at  | 1.11E-02 | 1.52 | 1.52 |
| TMTC2     | transmembrane and tetratricopeptide repeat containing 2              | 160335 | 235775_at    | 2.68E-02 | 1.52 | 1.52 |
| SPTLC1    | serine palmitoyltransferase, long chain base subunit 1               | 10558  | 202278_s_at  | 7.04E-03 | 1.52 | 1.52 |
| SCD       | stearoyl-CoA desaturase (delta-9-desaturase)                         | 6319   | 211708_s_at  | 1.63E-01 | 1.52 | 1.52 |
| FAM44A    | family with sequence similarity 44, member A                         | 259282 | 235009_at    | 4.39E-01 | 1.52 | 1.52 |
| CLASP2    | cytoplasmic linker associated protein 2                              | 23122  | 212308_at    | 1.89E-02 | 1.53 | 1.53 |
| FAM73A    | family with sequence similarity 73, member A                         | 374986 | 235125_x_at  | 5.08E-04 | 1.53 | 1.53 |
| LRP12     | low density lipoprotein-related protein 12                           | 29967  | 220254_at    | 3.32E-02 | 1.53 | 1.53 |
| KIAA0256  | KIAA0256 gene product                                                | 9728   | 212450_at    | 2.25E-03 | 1.53 | 1.53 |
| PPP2CB    | protein phosphatase 2 (formerly 2A), catalytic subunit, beta isoform | 5516   | 201375_s_at  | 2.21E-02 | 1.53 | 1.53 |
| ZNF529    | Zinc finger protein 529                                              | 57711  | 215307_at    | 4.58E-02 | 1.53 | 1.53 |
| RDH11     | retinol dehydrogenase 11 (all-trans/9-cis/11-cis)                    | 51109  | 217775_s_at  | 4.42E-03 | 1.53 | 1.53 |
| ---       | Transcribed locus                                                    | ---    | 228084_at    | 1.93E-02 | 1.53 | 1.53 |
| ---       | CDNA FLJ33091 fis, clone TRACH2000660                                | ---    | 232687_at    | 4.07E-02 | 1.53 | 1.53 |
| DICER1    | dicer 1, ribonuclease type III                                       | 23405  | 206061_s_at  | 8.17E-02 | 1.53 | 1.53 |
| GPM6B     | glycoprotein M6B                                                     | 2824   | 209167_at    | 2.69E-01 | 1.53 | 1.53 |
| SLC2A13   | solute carrier family 2 (facilitated glucose transporter), member 13 | 114134 | 1552695_a_at | 1.73E-01 | 1.53 | 1.53 |
| FAM152A   | family with sequence similarity 152, member A                        | 51029  | 222936_s_at  | 1.29E-02 | 1.54 | 1.54 |
| CYBRD1    | cytochrome b reductase 1                                             | 79901  | 222453_at    | 9.60E-03 | 1.54 | 1.54 |
| ---       | ---                                                                  | ---    | 237571_at    | 3.57E-03 | 1.54 | 1.54 |
| RHEB      | Ras homolog enriched in brain                                        | 6009   | 213404_s_at  | 3.66E-02 | 1.54 | 1.54 |
| NEU1      | sialidase 1 (lysosomal sialidase)                                    | 4758   | 208926_at    | 7.03E-03 | 1.54 | 1.54 |
| PNRC2     | proline-rich nuclear receptor coactivator 2                          | 55629  | 217779_s_at  | 4.55E-03 | 1.54 | 1.54 |
| HSPA5     | heat shock 70kDa protein 5 (glucose-regulated protein, 78kDa)        | 3309   | 230031_at    | 2.88E-03 | 1.54 | 1.54 |
| NMD3      | NMD3 homolog (S. cerevisiae)                                         | 51068  | 218036_x_at  | 8.52E-04 | 1.54 | 1.54 |
| MCAM      | melanoma cell adhesion molecule                                      | 4162   | 211340_s_at  | 1.20E-04 | 1.54 | 1.54 |
| IFRD1     | interferon-related developmental regulator 1                         | 3475   | 202147_s_at  | 4.40E-02 | 1.54 | 1.54 |
| KLHL2     | kelch-like 2, Mayven (Drosophila)                                    | 11275  | 219157_at    | 7.83E-04 | 1.55 | 1.55 |
| MAP2K6    | mitogen-activated protein kinase kinase 6                            | 5608   | 205698_s_at  | 3.91E-02 | 1.55 | 1.55 |
| TMTC2     | Transmembrane and tetratricopeptide repeat containing 2              | 160335 | 228574_at    | 5.95E-04 | 1.55 | 1.55 |
| RWDD2B    | RWD domain containing 2B                                             | 10069  | 222614_at    | 6.16E-03 | 1.55 | 1.55 |
| SEC24A    | SEC24 related gene family, member A (S. cerevisiae)                  | 10802  | 212900_at    | 9.92E-03 | 1.55 | 1.55 |
| LCP1      | lymphocyte cytosolic protein 1 (L-plastin)                           | 3936   | 208885_at    | 3.61E-02 | 1.55 | 1.55 |
| RC3H2     | ring finger and CCHH-type zinc finger domains 2                      | 54542  | 238421_at    | 3.13E-02 | 1.55 | 1.55 |
| FILIP1    | filamin A interacting protein 1                                      | 27145  | 231945_at    | 5.54E-04 | 1.56 | 1.56 |
| TMEM100   | transmembrane protein 100                                            | 55273  | 219230_at    | 8.07E-03 | 1.56 | 1.56 |
| SMPDL3A   | sphingomyelin phosphodiesterase, acid-like 3A                        | 10924  | 213624_at    | 7.84E-04 | 1.56 | 1.56 |
| CSNK1A1   | casein kinase 1, alpha 1                                             | 1452   | 213086_s_at  | 5.40E-03 | 1.56 | 1.56 |
| RPAP3     | RNA polymerase II associated protein 3                               | 79657  | 1557984_s_at | 3.23E-02 | 1.56 | 1.56 |
| ---       | Transcribed locus                                                    | ---    | 225950_at    | 4.13E-02 | 1.56 | 1.56 |
| DLAT      | dihydrolipoamide S-acetyltransferase                                 | 1737   | 213149_at    | 2.37E-02 | 1.56 | 1.56 |
| LOC387763 | hypothetical LOC387763                                               | 387763 | 227099_s_at  | 6.90E-02 | 1.56 | 1.56 |
| HK2       | hexokinase 2                                                         | 3099   | 202934_at    | 7.35E-02 | 1.56 | 1.56 |
| BMP2K     | BMP2 inducible kinase                                                | 55589  | 226853_at    | 3.88E-02 | 1.56 | 1.56 |
| TMED5     | Transmembrane emp24 protein transport domain containing 5            | 50999  | 242263_at    | 6.19E-03 | 1.56 | 1.56 |
| MBNL2     | muscleblind-like 2 (Drosophila)                                      | 10150  | 205018_s_at  | 5.48E-02 | 1.56 | 1.56 |
| FGD6      | FYVE, RhoGEF and PH domain containing 6                              | 55785  | 219901_at    | 3.83E-02 | 1.56 | 1.56 |
| EIF5A2    | eukaryotic translation initiation factor 5A2                         | 56648  | 235296_at    | 4.43E-02 | 1.57 | 1.57 |
| ZBTB41    | zinc finger and BTB domain containing 41                             | 360023 | 226962_at    | 5.28E-03 | 1.57 | 1.57 |
| KCNK1     | potassium channel, subfamily K, member 1                             | 3775   | 204679_at    | 2.54E-02 | 1.57 | 1.57 |
| MCAM      | melanoma cell adhesion molecule                                      | 4162   | 210869_s_at  | 5.37E-02 | 1.57 | 1.57 |
| ---       | CDNA FLJ39602 fis, clone SKNSH2005061                                | ---    | 226550_at    | 1.80E-03 | 1.57 | 1.57 |
| RC3H2     | ring finger and CCHH-type zinc finger domains 2                      | 54542  | 225813_at    | 2.58E-04 | 1.57 | 1.57 |
| CDH1      | cadherin 1, type 1, E-cadherin (epithelial)                          | 999    | 201131_s_at  | 3.91E-02 | 1.58 | 1.58 |

|           |                                                                                 |        |              |          |      |      |
|-----------|---------------------------------------------------------------------------------|--------|--------------|----------|------|------|
| CLNS1A    | chloride channel, nucleotide-sensitive, 1A                                      | 1207   | 209143_s_at  | 9.38E-02 | 1.58 | 1.58 |
| LRP12     | low density lipoprotein-related protein 12                                      | 29967  | 220253_s_at  | 4.79E-03 | 1.58 | 1.58 |
| PGGT1B    | Protein geranylgeranyltransferase type I, beta subunit                          | 5229   | 242844_at    | 1.02E-02 | 1.58 | 1.58 |
| TK1       | thymidine kinase 1, soluble                                                     | 7083   | 202338_at    | 1.71E-03 | 1.58 | 1.58 |
| PDK4      | pyruvate dehydrogenase kinase, isozyme 4                                        | 5166   | 225207_at    | 2.10E-01 | 1.58 | 1.58 |
| IL1RAP    | interleukin 1 receptor accessory protein                                        | 3556   | 205227_at    | 2.30E-02 | 1.58 | 1.58 |
| ERO1LB    | ERO1-like beta (S. cerevisiae)                                                  | 56605  | 231944_at    | 1.77E-02 | 1.58 | 1.58 |
| KLHL28    | kelch-like 28 (Drosophila)                                                      | 54813  | 235727_at    | 2.73E-03 | 1.58 | 1.58 |
| GABRB1    | gamma-aminobutyric acid (GABA) A receptor, beta 1                               | 2560   | 207010_at    | 4.22E-02 | 1.59 | 1.59 |
| GPD2      | glycerol-3-phosphate dehydrogenase 2 (mitochondrial)                            | 2820   | 225447_at    | 9.07E-02 | 1.59 | 1.59 |
| SGTB      | small glutamine-rich tetrapeptide repeat (TPR)-containing, beta                 | 54557  | 228745_at    | 9.11E-04 | 1.59 | 1.59 |
| SLC7A11   | solute carrier family 7, (cationic amino acid transporter, y+ system) member 11 | 23657  | 209921_at    | 1.32E-01 | 1.59 | 1.59 |
| UNKL      | unkempt homolog (Drosophila)-like                                               | 64718  | 229908_s_at  | 1.46E-02 | 1.59 | 1.59 |
| MAPK8     | mitogen-activated protein kinase 8                                              | 5599   | 226048_at    | 1.57E-02 | 1.59 | 1.59 |
| SCD       | stearoyl-CoA desaturase (delta-9-desaturase)                                    | 6319   | 211162_x_at  | 1.17E-01 | 1.59 | 1.59 |
| ---       | Transcribed locus                                                               | ---    | 241699_at    | 1.93E-02 | 1.59 | 1.59 |
| SLC40A1   | solute carrier family 40 (iron-regulated transporter), member 1                 | 30061  | 223044_at    | 6.89E-02 | 1.59 | 1.59 |
| EGF       | epidermal growth factor (beta-urogastrone)                                      | 1950   | 206254_at    | 8.48E-04 | 1.60 | 1.60 |
| SFTPH     | surfactant associated protein H                                                 | 253970 | 228979_at    | 8.24E-02 | 1.60 | 1.60 |
| ---       | CDNA FLJ39602 fis, clone SKNSH2005061                                           | ---    | 1558105_a_at | 8.79E-03 | 1.60 | 1.60 |
| SPPL2A    | signal peptide peptidase-like 2A                                                | 84888  | 226353_at    | 2.24E-04 | 1.60 | 1.60 |
| TK1       | thymidine kinase 1, soluble                                                     | 7083   | 1554408_a_at | 1.17E-02 | 1.61 | 1.61 |
| RNF13     | ring finger protein 13                                                          | 11342  | 201779_s_at  | 3.13E-04 | 1.61 | 1.61 |
| GCLM      | glutamate-cysteine ligase, modifier subunit                                     | 2730   | 236140_at    | 6.37E-03 | 1.61 | 1.61 |
| FGF7      | fibroblast growth factor 7                                                      | 2252   | 1554741_s_at | 2.66E-03 | 1.61 | 1.61 |
| STK38L    | serine/threonine kinase 38 like                                                 | 23012  | 212565_at    | 4.05E-02 | 1.61 | 1.61 |
| SEC24A    | SEC24 related gene family, member A (S. cerevisiae)                             | 10802  | 244841_at    | 1.15E-02 | 1.61 | 1.61 |
| RDH11     | retinol dehydrogenase 11 (all-trans/9-cis/11-cis)                               | 51109  | 217776_at    | 4.48E-03 | 1.61 | 1.61 |
| FGF2      | fibroblast growth factor 2 (basic)                                              | 2247   | 204422_s_at  | 2.46E-02 | 1.61 | 1.61 |
| KCNK1     | potassium channel, subfamily K, member 1                                        | 3775   | 204678_s_at  | 4.19E-02 | 1.61 | 1.61 |
| ---       | Transcribed locus                                                               | ---    | 228603_at    | 6.14E-03 | 1.62 | 1.62 |
| RHEB      | Ras homolog enriched in brain                                                   | 6009   | 201452_at    | 1.25E-01 | 1.62 | 1.62 |
| INHBE     | inhibin, beta E                                                                 | 83729  | 210587_at    | 2.41E-01 | 1.62 | 1.62 |
| SNAP91    | synaptosomal-associated protein, 91kDa homolog (mouse)                          | 9892   | 204953_at    | 7.02E-03 | 1.62 | 1.62 |
| MIPOL1    | mirror-image polydactyly 1                                                      | 145282 | 244246_at    | 4.67E-02 | 1.62 | 1.62 |
| SLC4A4    | solute carrier family 4, sodium bicarbonate cotransporter, member 4             | 8671   | 203908_at    | 1.16E-01 | 1.62 | 1.62 |
| ---       | CDNA FLJ30669 fis, clone FCBBF1000684                                           | ---    | 230764_at    | 2.23E-02 | 1.62 | 1.62 |
| RNF13     | ring finger protein 13                                                          | 11342  | 201780_s_at  | 1.10E-03 | 1.62 | 1.62 |
| MBNL2     | muscleblind-like 2 (Drosophila)                                                 | 10150  | 203640_at    | 1.64E-03 | 1.63 | 1.63 |
| ANKRD43   | ankyrin repeat domain 43                                                        | 134548 | 230238_at    | 1.03E-02 | 1.63 | 1.63 |
| SLC4A7    | solute carrier family 4, sodium bicarbonate cotransporter, member 7             | 9497   | 207604_s_at  | 3.40E-02 | 1.63 | 1.63 |
| ANXA1     | annexin A1                                                                      | 301    | 201012_at    | 1.54E-02 | 1.63 | 1.63 |
| ---       | Transcribed locus                                                               | ---    | 235585_at    | 3.31E-04 | 1.63 | 1.63 |
| SPTBN1    | spectrin, beta, non-erythrocytic 1                                              | 6711   | 226342_at    | 4.95E-03 | 1.64 | 1.64 |
| FAM3C     | family with sequence similarity 3, member C                                     | 10447  | 201889_at    | 2.42E-04 | 1.64 | 1.64 |
| ---       | Clone 25028 mRNA sequence                                                       | ---    | 227027_at    | 8.66E-03 | 1.64 | 1.64 |
| C6orf120  | chromosome 6 open reading frame 120                                             | 387263 | 221786_at    | 1.06E-02 | 1.64 | 1.64 |
| TDG       | thymine-DNA glycosylase                                                         | 6996   | 203743_s_at  | 2.12E-02 | 1.64 | 1.64 |
| CYP4X1    | cytochrome P450, family 4, subfamily X, polypeptide 1                           | 260293 | 227702_at    | 6.96E-03 | 1.65 | 1.65 |
| TFPI      | tissue factor pathway inhibitor (lipoprotein-associated coagulation inhibitor)  | 7035   | 210664_s_at  | 5.56E-02 | 1.65 | 1.65 |
| ELOVL4    | elongation of very long chain fatty acids (FEN1/Elo2, SUR4/Elo3, yeast)-like 4  | 6785   | 219532_at    | 6.89E-06 | 1.65 | 1.65 |
| ENOPH1    | enolase-phosphatase 1                                                           | 58478  | 217956_s_at  | 1.72E-03 | 1.66 | 1.66 |
| RABGAP1L  | RAB GTPase activating protein 1-like                                            | 9910   | 213982_s_at  | 7.51E-02 | 1.66 | 1.66 |
| PURA      | purine-rich element binding protein A                                           | 5813   | 204020_at    | 7.05E-03 | 1.66 | 1.66 |
| DICER1    | dicer 1, ribonuclease type III                                                  | 23405  | 212888_at    | 9.57E-03 | 1.67 | 1.67 |
| TFPI      | tissue factor pathway inhibitor (lipoprotein-associated coagulation inhibitor)  | 7035   | 210665_at    | 3.69E-02 | 1.67 | 1.67 |
| LONRF1    | LON peptidase N-terminal domain and ring finger 1                               | 91694  | 226038_at    | 2.06E-02 | 1.67 | 1.67 |
| LOC492311 | similar to bovine IgA regulatory protein                                        | 492311 | 226977_at    | 3.27E-02 | 1.67 | 1.67 |
| PPID      | Peptidylprolyl isomerase D (cyclophilin D)                                      | 5481   | 228469_at    | 9.44E-02 | 1.68 | 1.68 |
| ANK3      | ankyrin 3, node of Ranvier (ankyrin G)                                          | 288    | 206385_s_at  | 1.73E-03 | 1.68 | 1.68 |

|           |                                                                                  |        |              |          |      |      |
|-----------|----------------------------------------------------------------------------------|--------|--------------|----------|------|------|
| HSPB8     | heat shock 22kDa protein 8                                                       | 26353  | 221667_s_at  | 1.03E-02 | 1.68 | 1.68 |
| COPS8     | COP9 constitutive photomorphogenic homolog subunit 8 (Arabidopsis)               | 10920  | 202142_at    | 3.74E-02 | 1.68 | 1.68 |
| SLMO2     | slowmo homolog 2 (Drosophila)                                                    | 51012  | 217851_s_at  | 3.86E-02 | 1.68 | 1.68 |
| CRIM1     | cysteine rich transmembrane BMP regulator 1 (chordin-like)                       | 51232  | 202551_s_at  | 2.11E-03 | 1.69 | 1.69 |
| MOXD1     | monooxygenase, DBH-like 1                                                        | 26002  | 1554474_a_at | 6.48E-02 | 1.69 | 1.69 |
| SLC7A11   | solute carrier family 7, (cationic amino acid transporter, y+ system) member 11  | 23657  | 207528_s_at  | 2.37E-02 | 1.69 | 1.69 |
| MAGT1     | magnesium transporter 1                                                          | ---    | 210596_at    | 5.04E-02 | 1.69 | 1.69 |
| KLRC1     | killer cell lectin-like receptor subfamily C, member 1                           | 3821   | 206785_s_at  | 8.60E-04 | 1.69 | 1.69 |
| NCOA2     | nuclear receptor coactivator 2                                                   | 10499  | 205732_s_at  | 2.46E-04 | 1.69 | 1.69 |
| COPS8     | COP9 constitutive photomorphogenic homolog subunit 8 (Arabidopsis)               | 10920  | 202141_s_at  | 5.63E-02 | 1.69 | 1.69 |
| NAP1L1    | nucleosome assembly protein 1-like 1                                             | 4673   | 208753_s_at  | 1.66E-02 | 1.70 | 1.70 |
| PPP3CB    | protein phosphatase 3 (formerly 2B), catalytic subunit, beta isoform             | 5532   | 209817_at    | 1.05E-03 | 1.70 | 1.70 |
| CSNK1A1   | casein kinase 1, alpha 1                                                         | 1452   | 208866_at    | 3.36E-04 | 1.70 | 1.70 |
| TACC1     | transforming, acidic coiled-coil containing protein 1                            | 6867   | 1554690_a_at | 3.72E-03 | 1.70 | 1.70 |
| TCEAL7    | transcription elongation factor A (SII)-like 7                                   | 56849  | 227705_at    | 2.65E-02 | 1.71 | 1.71 |
| TMED5     | transmembrane emp24 protein transport domain containing 5                        | 50999  | 202194_at    | 8.93E-03 | 1.71 | 1.71 |
| UBA3      | ubiquitin-like modifier activating enzyme 3                                      | 9039   | 209115_at    | 8.52E-03 | 1.71 | 1.71 |
| KIAA0256  | KIAA0256 gene product                                                            | 9728   | 212451_at    | 3.70E-02 | 1.71 | 1.71 |
| C10orf46  | chromosome 10 open reading frame 46                                              | 143384 | 227257_s_at  | 6.82E-02 | 1.71 | 1.71 |
| MAGT1     | magnesium transporter 1                                                          | 728866 | 221553_at    | 4.14E-03 | 1.72 | 1.72 |
| CRIM1     | cysteine rich transmembrane BMP regulator 1 (chordin-like)                       | 51232  | 202552_s_at  | 6.82E-05 | 1.72 | 1.72 |
| RAB21     | RAB21, member RAS oncogene family                                                | 23011  | 203885_at    | 9.05E-03 | 1.72 | 1.72 |
| RHEB      | Ras homolog enriched in brain                                                    | 6009   | 1555780_a_at | 1.54E-02 | 1.72 | 1.72 |
| ATG2B     | ATG2 autophagy related 2 homolog B (S. cerevisiae)                               | 55102  | 226684_at    | 1.44E-02 | 1.72 | 1.72 |
| H2AFY     | H2A histone family, member Y                                                     | 9555   | 214500_at    | 2.43E-04 | 1.73 | 1.73 |
| ELL2      | elongation factor, RNA polymerase II, 2                                          | 22936  | 226982_at    | 1.73E-02 | 1.73 | 1.73 |
| BCAT1     | branched chain aminotransferase 1, cytosolic                                     | 586    | 214452_at    | 7.38E-02 | 1.73 | 1.73 |
| C10orf46  | chromosome 10 open reading frame 46                                              | 143384 | 225192_at    | 1.86E-02 | 1.73 | 1.73 |
| CSNK1A1   | casein kinase 1, alpha 1                                                         | 1452   | 208867_s_at  | 2.08E-03 | 1.73 | 1.73 |
| PHTF2     | putative homeodomain transcription factor 2                                      | 57157  | 217097_s_at  | 3.97E-02 | 1.74 | 1.74 |
| DEF8      | differentially expressed in FDCP 8 homolog (mouse)                               | 54849  | 219646_at    | 7.82E-03 | 1.74 | 1.74 |
| SYTL5     | synaptotagmin-like 5                                                             | ---    | 242093_at    | 3.43E-03 | 1.74 | 1.74 |
| CRIM1     | Cysteine rich transmembrane BMP regulator 1 (chordin-like)                       | 51232  | 228496_s_at  | 4.66E-04 | 1.75 | 1.75 |
| GNB4      | guanine nucleotide binding protein (G protein), beta polypeptide 4               | 59345  | 223487_x_at  | 9.92E-03 | 1.75 | 1.75 |
| CLDND1    | claudin domain containing 1                                                      | 56650  | 1554149_at   | 3.78E-03 | 1.75 | 1.75 |
| SLC39A10  | solute carrier family 39 (zinc transporter), member 10                           | 57181  | 225295_at    | 2.49E-03 | 1.75 | 1.75 |
| ASPH      | aspartate beta-hydroxylase                                                       | 444    | 209135_at    | 7.76E-03 | 1.76 | 1.76 |
| LOC221710 | Hypothetical protein LOC221710                                                   | 221710 | 227124_at    | 1.24E-03 | 1.77 | 1.77 |
| RHEB      | Ras homolog enriched in brain                                                    | 6009   | 213409_s_at  | 5.90E-03 | 1.78 | 1.78 |
| B4GALT4   | UDP-Gal:betaGlcNAc beta 1,4- galactosyltransferase, polypeptide 4                | 8702   | 210540_s_at  | 1.03E-03 | 1.78 | 1.78 |
| LOC493869 | similar to RIKEN cDNA 2310016C16                                                 | 493869 | 227628_at    | 8.65E-03 | 1.78 | 1.78 |
| C21orf91  | chromosome 21 open reading frame 91                                              | 54149  | 226109_at    | 3.63E-03 | 1.78 | 1.78 |
| CSNK1A1   | casein kinase 1, alpha 1                                                         | 1452   | 208865_at    | 9.02E-03 | 1.78 | 1.78 |
| SFXN4     | sideroflexin 4                                                                   | 119559 | 229236_s_at  | 8.14E-03 | 1.79 | 1.79 |
| SERPINF1  | serpin peptidase inhibitor, clade F (alpha-2 antiplasmin, pigment epithelium der | 5176   | 202283_at    | 1.76E-02 | 1.79 | 1.79 |
| ---       | CDNA clone IMAGE:5296106                                                         | ---    | 1556834_at   | 1.95E-02 | 1.79 | 1.79 |
| ZNF238    | zinc finger protein 238                                                          | 10472  | 212774_at    | 1.03E-02 | 1.80 | 1.80 |
| GNB4      | guanine nucleotide binding protein (G protein), beta polypeptide 4               | 59345  | 225710_at    | 3.98E-03 | 1.80 | 1.80 |
| ---       | Transcribed locus                                                                | ---    | 234986_at    | 2.41E-04 | 1.80 | 1.80 |
| MAPK8     | mitogen-activated protein kinase 8                                               | 5599   | 226046_at    | 2.20E-02 | 1.81 | 1.81 |
| KLHL28    | kelch-like 28 (Drosophila)                                                       | 54813  | 228328_at    | 1.68E-04 | 1.81 | 1.81 |
| MEGF10    | multiple EGF-like-domains 10                                                     | 84466  | 232523_at    | 1.26E-03 | 1.82 | 1.82 |
| ---       | CDNA: FLJ22522 fis, clone HRC12491                                               | ---    | 227095_at    | 3.36E-03 | 1.82 | 1.82 |
| ZMAT3     | zinc finger, matrin type 3                                                       | 64393  | 1555609_a_at | 6.54E-02 | 1.82 | 1.82 |
| LOC493869 | Similar to RIKEN cDNA 2310016C16                                                 | 493869 | 228141_at    | 4.46E-04 | 1.82 | 1.82 |
| CLDND1    | claudin domain containing 1                                                      | 56650  | 208925_at    | 1.02E-02 | 1.84 | 1.84 |
| CHRNA9    | cholinergic receptor, nicotinic, alpha 9                                         | 55584  | 221107_at    | 1.86E-03 | 1.85 | 1.85 |
| NTS       | neurotensin                                                                      | 4922   | 206291_at    | 3.33E-04 | 1.85 | 1.85 |
| SFXN4     | sideroflexin 4                                                                   | 119559 | 225143_at    | 1.45E-02 | 1.86 | 1.86 |

|         |                                                                                  |        |              |          |      |      |
|---------|----------------------------------------------------------------------------------|--------|--------------|----------|------|------|
| RAB8B   | RAB8B, member RAS oncogene family                                                | 51762  | 222846_at    | 8.11E-02 | 1.87 | 1.87 |
| RAB21   | RAB21, member RAS oncogene family                                                | 23011  | 226268_at    | 3.76E-02 | 1.88 | 1.88 |
| ---     | Transcribed locus, weakly similar to NP_608540.1 CG2839 CG2839-PA [Drosophila me | ---    | 239329_at    | 2.56E-02 | 1.89 | 1.89 |
| FAM49B  | family with sequence similarity 49, member B                                     | 51571  | 217916_s_at  | 1.24E-02 | 1.90 | 1.90 |
| KRAS    | v-Ki-ras2 Kirsten rat sarcoma viral oncogene homolog                             | 3845   | 214352_s_at  | 2.11E-02 | 1.92 | 1.92 |
| RAB8B   | RAB8B, member RAS oncogene family                                                | 51762  | 226633_at    | 2.15E-02 | 1.93 | 1.93 |
| F2RL2   | coagulation factor II (thrombin) receptor-like 2                                 | 2151   | 230147_at    | 7.60E-02 | 1.93 | 1.93 |
| RBM24   | RNA binding motif protein 24                                                     | 221662 | 235004_at    | 2.86E-03 | 1.95 | 1.95 |
| CLCN4   | chloride channel 4                                                               | 1183   | 214769_at    | 2.19E-03 | 1.96 | 1.96 |
| CCL20   | chemokine (C-C motif) ligand 20                                                  | 6364   | 205476_at    | 5.72E-02 | 1.98 | 1.98 |
| C8orf4  | chromosome 8 open reading frame 4                                                | 56892  | 218541_s_at  | 2.32E-03 | 1.98 | 1.98 |
| KRAS    | v-Ki-ras2 Kirsten rat sarcoma viral oncogene homolog                             | 3845   | 204009_s_at  | 5.43E-03 | 2.00 | 2.00 |
| ---     | Transcribed locus                                                                | ---    | 229167_at    | 3.34E-03 | 2.00 | 2.00 |
| TNFRSF9 | tumor necrosis factor receptor superfamily, member 9                             | 3604   | 207536_s_at  | 2.59E-02 | 2.01 | 2.01 |
| TACC1   | transforming, acidic coiled-coil containing protein 1                            | 6867   | 217437_s_at  | 1.51E-03 | 2.01 | 2.01 |
| KLHL15  | kelch-like 15 (Drosophila)                                                       | 80311  | 226370_at    | 1.99E-03 | 2.02 | 2.02 |
| SELT    | selenoprotein T                                                                  | 51714  | 217811_at    | 1.37E-04 | 2.03 | 2.03 |
| PHTF2   | putative homeodomain transcription factor 2                                      | 57157  | 209780_at    | 8.30E-03 | 2.03 | 2.03 |
| SLC4A7  | solute carrier family 4, sodium bicarbonate cotransporter, member 7              | 9497   | 210286_s_at  | 6.15E-02 | 2.03 | 2.03 |
| ADAM9   | ADAM metallopeptidase domain 9 (meltrin gamma)                                   | 8754   | 202381_at    | 1.59E-02 | 2.04 | 2.04 |
| GALNT7  | UDP-N-acetyl-alpha-D-galactosamine:polypeptide N-acetylgalactosaminyltransferase | 51809  | 218313_s_at  | 1.26E-02 | 2.05 | 2.05 |
| NHLRC3  | NHL repeat containing 3                                                          | 387921 | 227040_at    | 4.78E-04 | 2.05 | 2.05 |
| IMPACT  | Impact homolog (mouse)                                                           | 55364  | 218637_at    | 3.81E-02 | 2.11 | 2.11 |
| AMMECR1 | Alport syndrome, mental retardation, midface hypoplasia and elliptocytosis chrom | 9949   | 1553219_a_at | 2.07E-03 | 2.11 | 2.11 |
| TFPI    | tissue factor pathway inhibitor (lipoprotein-associated coagulation inhibitor)   | 7035   | 209676_at    | 1.26E-02 | 2.12 | 2.12 |
| AMMECR1 | Alport syndrome, mental retardation, midface hypoplasia and elliptocytosis chrom | 9949   | 204976_s_at  | 3.61E-03 | 2.12 | 2.12 |
| ASPH    | aspartate beta-hydroxylase                                                       | 444    | 210896_s_at  | 6.45E-03 | 2.16 | 2.16 |
| TACC1   | transforming, acidic coiled-coil containing protein 1                            | 6867   | 200911_s_at  | 1.89E-04 | 2.17 | 2.17 |
| SLC4A7  | solute carrier family 4, sodium bicarbonate cotransporter, member 7              | 9497   | 209884_s_at  | 2.99E-03 | 2.18 | 2.18 |
| GALNT7  | UDP-N-acetyl-alpha-D-galactosamine:polypeptide N-acetylgalactosaminyltransferase | 51809  | 222587_s_at  | 2.38E-02 | 2.20 | 2.20 |
| HMOX1   | heme oxygenase (decycling) 1                                                     | 3162   | 203665_at    | 3.73E-02 | 2.21 | 2.21 |
| ZMAT3   | zinc finger, matrix type 3                                                       | 64393  | 219628_at    | 2.37E-02 | 2.21 | 2.21 |
| ADAM9   | ADAM metallopeptidase domain 9 (meltrin gamma)                                   | 8754   | 1555326_a_at | 2.47E-02 | 2.22 | 2.22 |
| ---     | CDNA clone IMAGE:5261213                                                         | ---    | 225725_at    | 2.00E-02 | 2.22 | 2.22 |
| PTX3    | pentraxin-related gene, rapidly induced by IL-1 beta                             | 5806   | 206157_at    | 1.06E-01 | 2.22 | 2.22 |
| TFPI    | tissue factor pathway inhibitor (lipoprotein-associated coagulation inhibitor)   | 7035   | 213258_at    | 1.54E-03 | 2.28 | 2.28 |
| ---     | CDNA clone IMAGE:5261213                                                         | ---    | 227221_at    | 1.95E-02 | 2.34 | 2.34 |
| ARL6IP1 | ADP-ribosylation factor-like 6 interacting protein 1                             | 23204  | 211935_at    | 1.62E-02 | 2.47 | 2.47 |
| AMMECR1 | Alport syndrome, mental retardation, midface hypoplasia and elliptocytosis chrom | 9949   | 226421_at    | 1.86E-03 | 2.48 | 2.48 |
| LUM     | lumican                                                                          | 4060   | 201744_s_at  | 1.95E-05 | 2.57 | 2.57 |
| REEP3   | receptor accessory protein 3                                                     | 221035 | 225785_at    | 1.50E-04 | 2.68 | 2.68 |
| REEP3   | receptor accessory protein 3                                                     | 221035 | 235016_at    | 3.28E-03 | 2.73 | 2.73 |
| ---     | CDNA clone IMAGE:5261213                                                         | ---    | 228315_at    | 3.51E-02 | 2.75 | 2.75 |
| TAC1    | tachykinin, precursor 1                                                          | 6863   | 206552_s_at  | 2.33E-04 | 2.94 | 2.94 |

**Table 2** Results of the ANOVA calculation of Mouse  $Qk1^{fgt/gt}$  adult dorsal cortex vs. wildtype (p < 0.05; FC < -1.5 or > 1.5)

| Gene Symbol | Gene Title                                          | Entrez Gene | Probeset ID  | p-value  | FDR-adjusted p-value | Fold-Change |
|-------------|-----------------------------------------------------|-------------|--------------|----------|----------------------|-------------|
| ---         | ---                                                 | ---         | 1447258_at   | 3.52E-07 | 1.59E-03             | -5.82       |
| Myst4       | MYST histone acetyltransferase monocytic leukemia 4 | 54169       | 1423508_at   | 1.01E-08 | 1.14E-04             | -5.54       |
| D14Ertd725e | DNA segment, Chr 14, ERATO Doi 725, expressed       | 52524       | 1439980_at   | 2.94E-07 | 1.48E-03             | -4.91       |
| Ctxn3       | cortixin 3                                          | 629147      | 1438059_at   | 6.79E-09 | 1.02E-04             | -3.68       |
| Myl1        | myosin, light polypeptide 1                         | 17901       | 1452651_a_at | 2.12E-05 | 4.35E-02             | -2.66       |
| Alas2       | aminolevulinic acid synthase 2, erythroid           | 11656       | 1451675_a_at | 3.85E-02 | 1.00E+00             | -2.52       |

|               |                                                                                     |        |              |          |          |       |
|---------------|-------------------------------------------------------------------------------------|--------|--------------|----------|----------|-------|
| 6030427F01Rik | RIKEN cDNA 6030427F01 gene                                                          | 97411  | 1458931_at   | 3.63E-02 | 1.00E+00 | -2.38 |
| Ugt8a         | UDP galactosyltransferase 8A                                                        | 22239  | 1419064_a_at | 2.87E-03 | 9.66E-01 | -2.31 |
| Gpr103        | G protein-coupled receptor 103                                                      | 229214 | 1457048_at   | 1.27E-05 | 2.72E-02 | -2.31 |
| 9030218A15Rik | RIKEN cDNA 9030218A15 gene                                                          | 77662  | 1432790_at   | 2.89E-02 | 1.00E+00 | -2.28 |
| Rab40c        | Rab40c, member RAS oncogene family                                                  | 224624 | 1424332_at   | 1.58E-02 | 1.00E+00 | -2.22 |
| Lgi3          | leucine-rich repeat LGI family, member 3                                            | 213469 | 1436238_at   | 1.46E-03 | 6.84E-01 | -2.14 |
| Cd24a         | CD24a antigen                                                                       | 12484  | 1416034_at   | 2.62E-03 | 9.61E-01 | -2.08 |
| Rorb          | RAR-related orphan receptor beta                                                    | 225998 | 1425162_at   | 4.24E-02 | 1.00E+00 | -2.03 |
| 4931433A01Rik | RIKEN cDNA 4931433A01 gene                                                          | 78933  | 1438158_at   | 3.48E-04 | 2.75E-01 | -2.00 |
| 2900073C17Rik | RIKEN cDNA 2900073C17 gene                                                          | 73020  | 1454301_at   | 4.80E-03 | 1.00E+00 | -1.98 |
| Gabra3        | gamma-aminobutyric acid (GABA-A) receptor, subunit alpha 3                          | 14396  | 1421263_at   | 1.07E-03 | 5.62E-01 | -1.98 |
| 6430550H21Rik | RIKEN cDNA 6430550H21 gene                                                          | 245386 | 1437137_at   | 2.43E-02 | 1.00E+00 | -1.97 |
| Kcna2         | potassium voltage-gated channel, shaker-related subfamily, member 2                 | 16490  | 1422197_at   | 2.67E-04 | 2.33E-01 | -1.97 |
| Hrasls        | HRAS-like suppressor                                                                | 27281  | 1422919_at   | 2.36E-02 | 1.00E+00 | -1.95 |
| 4833410I11Rik | RIKEN cDNA 4833410I11 gene                                                          | 74612  | 1432836_at   | 9.32E-05 | 1.26E-01 | -1.92 |
| ---           | Transcribed locus, weakly similar to XP_001474741.1<br>PREDICTED: hypothetical prot | ---    | 1446809_at   | 8.38E-05 | 1.18E-01 | -1.91 |
| ---           | Transcribed locus                                                                   | ---    | 1447473_at   | 4.92E-02 | 1.00E+00 | -1.90 |
| Etv5          | ets variant gene 5                                                                  | 104156 | 1420998_at   | 8.42E-03 | 1.00E+00 | -1.89 |
| Edil3         | EGF-like repeats and discoidin I-like domains 3                                     | 13612  | 1425622_at   | 6.23E-03 | 1.00E+00 | -1.87 |
| Gfra2         | glial cell line derived neurotrophic factor family receptor alpha 2                 | 14586  | 1423007_a_at | 1.05E-04 | 1.32E-01 | -1.86 |
| lfih1         | interferon induced with helicase C domain 1                                         | 71586  | 1426276_at   | 4.55E-03 | 1.00E+00 | -1.86 |
| ---           | Transcribed locus                                                                   | ---    | 1457137_at   | 1.57E-06 | 5.43E-03 | -1.84 |
| Olfml1        | olfactomedin-like 1                                                                 | 244198 | 1455663_at   | 9.70E-03 | 1.00E+00 | -1.84 |
| Opa1          | optic atrophy 1 homolog (human)                                                     | 100046 | 1418768_at   | 1.18E-02 | 1.00E+00 | -1.83 |
| Zbtb43        | zinc finger and BTB domain containing 43                                            | 71834  | 1431127_at   | 6.90E-03 | 1.00E+00 | -1.81 |
| Foxn3         | forkhead box N3                                                                     | 71375  | 1453094_at   | 3.07E-03 | 9.87E-01 | -1.80 |
| Pde10a        | phosphodiesterase 10A                                                               | 23984  | 1419389_at   | 1.02E-02 | 1.00E+00 | -1.77 |
| ---           | Transcribed locus                                                                   | ---    | 1443268_at   | 1.25E-04 | 1.49E-01 | -1.77 |
| Tacc1         | transforming, acidic coiled-coil containing protein 1                               | 320165 | 1429591_at   | 4.91E-02 | 1.00E+00 | -1.77 |
| Kcnab1        | potassium voltage-gated channel, shaker-related subfamily, beta member 1            | 16497  | 1454043_a_at | 2.57E-02 | 1.00E+00 | -1.76 |
| Mtf2          | Metal response element binding transcription factor 2                               | 17765  | 1445151_at   | 2.20E-04 | 2.06E-01 | -1.76 |
| Rnf39         | Ring finger protein 39                                                              | 386454 | 1441793_at   | 1.19E-02 | 1.00E+00 | -1.76 |
| Coro1c        | coronin, actin binding protein 1C                                                   | 23790  | 1417752_at   | 1.72E-02 | 1.00E+00 | -1.75 |
| Pcnx          | pecanex homolog (Drosophila)                                                        | 54604  | 1419049_at   | 3.26E-03 | 1.00E+00 | -1.74 |
| Syt1          | synaptotagmin I                                                                     | 20979  | 1421990_at   | 4.94E-02 | 1.00E+00 | -1.74 |
| LOC665506     | similar to T-cell receptor beta-2 chain C region                                    | 665506 | 1425854_x_at | 1.25E-05 | 2.72E-02 | -1.74 |
| Mobp          | myelin-associated oligodendrocytic basic protein                                    | 17433  | 1450088_a_at | 4.13E-02 | 1.00E+00 | -1.73 |
| Col4a3bp      | collagen, type IV, alpha 3 (Goodpasture antigen) binding protein                    | 68018  | 1420383_a_at | 1.71E-02 | 1.00E+00 | -1.71 |
| Il12a         | interleukin 12a                                                                     | 16159  | 1425454_a_at | 1.15E-04 | 1.40E-01 | -1.70 |
| ---           | Transcribed locus, strongly similar to NP_080291.1 zinc finger, matrin type 5 [M]   | ---    | 1436141_at   | 5.61E-04 | 3.72E-01 | -1.69 |
| B930006L02Rik | RIKEN cDNA B930006L02 gene                                                          | 319604 | 1454950_at   | 4.19E-05 | 6.99E-02 | -1.68 |
| Prpf40a       | PRP40 pre-mRNA processing factor 40 homolog A (yeast)                               | 56194  | 1420917_at   | 1.34E-02 | 1.00E+00 | -1.68 |
| Prg4          | proteoglycan 4 (megakaryocyte stimulating factor, articular superficial zone pro    | 96875  | 1449824_at   | 3.17E-02 | 1.00E+00 | -1.67 |
| Tnnt2         | troponin T2, cardiac                                                                | 21956  | 1424967_x_at | 1.47E-02 | 1.00E+00 | -1.67 |
| E130009J12Rik | RIKEN cDNA E130009J12 gene                                                          | 381107 | 1439575_at   | 4.90E-04 | 3.40E-01 | -1.67 |
| Slc25a27      | solute carrier family 25, member 27                                                 | 74011  | 1454230_a_at | 1.39E-02 | 1.00E+00 | -1.65 |
| Ppp3r1        | protein phosphatase 3, regulatory subunit B, alpha isoform (calcineurin B, type     | 19058  | 1450368_a_at | 1.66E-02 | 1.00E+00 | -1.64 |
| Nfe2l3        | nuclear factor, erythroid derived 2, like 3                                         | 18025  | 1417520_at   | 9.46E-03 | 1.00E+00 | -1.64 |
| Ufsp1         | UFM1-specific peptidase 1                                                           | 70240  | 1447822_x_at | 3.74E-04 | 2.81E-01 | -1.63 |
| Immt          | inner membrane protein, mitochondrial                                               | 76614  | 1429533_at   | 1.42E-02 | 1.00E+00 | -1.63 |
| Tmtc4         | transmembrane and tetratricopeptide repeat containing 4                             | 70551  | 1432360_a_at | 1.90E-02 | 1.00E+00 | -1.63 |
| Pxmp4         | peroxisomal membrane protein 4                                                      | 59038  | 1422780_at   | 3.29E-02 | 1.00E+00 | -1.63 |
| Cd24a         | CD24a antigen                                                                       | 12484  | 1448182_a_at | 2.46E-02 | 1.00E+00 | -1.63 |
| Myh1          | myosin, heavy polypeptide 1, skeletal muscle, adult                                 | 17879  | 1427520_a_at | 3.55E-02 | 1.00E+00 | -1.63 |
| 5730414N17Rik | RIKEN cDNA 5730414N17 gene                                                          | 70524  | 1429899_at   | 2.03E-03 | 8.56E-01 | -1.62 |
| Pcdh9         | protocadherin 9                                                                     | 211712 | 1458269_at   | 1.07E-02 | 1.00E+00 | -1.62 |
| Ptger3        | prostaglandin E receptor 3 (subtype EP3)                                            | 19218  | 1450344_a_at | 9.32E-03 | 1.00E+00 | -1.62 |
| Carhsp1       | calcium regulated heat stable protein 1                                             | 100046 | 1415976_a_at | 1.01E-02 | 1.00E+00 | -1.62 |
| Klhdc8a       | kelch domain containing 8A                                                          | 213417 | 1441940_x_at | 6.96E-03 | 1.00E+00 | -1.61 |

|                    |                                                                   |        |              |          |          |       |
|--------------------|-------------------------------------------------------------------|--------|--------------|----------|----------|-------|
| Pibf1              | progesterone immunomodulatory binding factor 1                    | 52023  | 1430698_a_at | 2.75E-02 | 1.00E+00 | -1.61 |
| Pdxdc1             | pyridoxal-dependent decarboxylase domain containing 1             | 94184  | 1436372_a_at | 1.81E-02 | 1.00E+00 | -1.61 |
| Map2k5             | mitogen-activated protein kinase kinase 5                         | 23938  | 1453712_a_at | 3.79E-02 | 1.00E+00 | -1.60 |
| ---                | Transcribed locus                                                 | ---    | 1456781_at   | 4.77E-02 | 1.00E+00 | -1.60 |
| ---                | Transcribed locus                                                 | ---    | 1444238_at   | 1.36E-04 | 1.56E-01 | -1.60 |
| Ranbp3l            | RAN binding protein 3-like                                        | 223332 | 1455707_at   | 2.44E-02 | 1.00E+00 | -1.60 |
| Epb4.1l2           | erythrocyte protein band 4.1-like 2                               | 13822  | 1433492_at   | 5.39E-04 | 3.68E-01 | -1.60 |
| Sprn               | shadow of prion protein                                           | 212518 | 1459019_at   | 2.63E-02 | 1.00E+00 | -1.59 |
| Plekha7            | pleckstrin homology domain containing, family A member 7          | 233765 | 1455343_at   | 3.60E-02 | 1.00E+00 | -1.59 |
| Frmd4b             | FERM domain containing 4B                                         | 232288 | 1426594_at   | 2.95E-02 | 1.00E+00 | -1.59 |
| Tnfsf12            | tumor necrosis factor (ligand) superfamily, member 12             | 100048 | 1452440_at   | 1.82E-06 | 5.87E-03 | -1.59 |
| Zfp296             | zinc finger protein 296                                           | 63872  | 1449231_at   | 4.19E-07 | 1.72E-03 | -1.58 |
| lfngr2             | interferon gamma receptor 2                                       | 15980  | 1423557_at   | 2.97E-02 | 1.00E+00 | -1.58 |
| Ltb4dh             | leukotriene B4 12-hydroxydehydrogenase                            | 67103  | 1417777_at   | 4.90E-02 | 1.00E+00 | -1.58 |
| ---                | ---                                                               | ---    | 1459834_x_at | 1.40E-02 | 1.00E+00 | -1.58 |
| Mr1                | major histocompatibility complex, class I-related                 | 15064  | 1421899_a_at | 2.25E-02 | 1.00E+00 | -1.57 |
| ---                | ---                                                               | ---    | 1449781_at   | 2.14E-03 | 8.66E-01 | -1.57 |
| Serinc1            | serine incorporator 1                                             | 56442  | 1437513_a_at | 4.09E-02 | 1.00E+00 | -1.57 |
| Dtna               | dystrobrevin alpha                                                | 13527  | 1419223_a_at | 1.65E-02 | 1.00E+00 | -1.56 |
| Tle6               | transducin-like enhancer of split 6, homolog of Drosophila E(spl) | 114606 | 1448727_at   | 7.93E-03 | 1.00E+00 | -1.56 |
| ---                | ---                                                               | ---    | 1457847_at   | 3.60E-02 | 1.00E+00 | -1.55 |
| Gm967              | gene model 967, (NCBI)                                            | 381217 | 1447475_at   | 8.99E-03 | 1.00E+00 | -1.55 |
| Rab3c              | RAB3C, member RAS oncogene family                                 | 100044 | 1449494_at   | 1.14E-02 | 1.00E+00 | -1.55 |
| Kcnq3              | potassium voltage-gated channel, subfamily Q, member 3            | 110862 | 1458421_at   | 2.12E-03 | 8.66E-01 | -1.54 |
| 4930429B21Rik      | RIKEN cDNA 4930429B21 gene                                        | 67576  | 1420580_at   | 2.71E-03 | 9.65E-01 | -1.54 |
| 1110051M20Rik      | RIKEN cDNA 1110051M20 gene                                        | 228356 | 1447229_x_at | 1.12E-02 | 1.00E+00 | -1.54 |
| Chrna6             | cholinergic receptor, nicotinic, alpha polypeptide 6              | 11440  | 1450427_at   | 2.23E-04 | 2.06E-01 | -1.53 |
| ---                | ---                                                               | ---    | 1457483_at   | 1.05E-02 | 1.00E+00 | -1.52 |
| Cdc14a             | CDC14 cell division cycle 14 homolog A (S. cerevisiae)            | 229776 | 1436913_at   | 3.62E-02 | 1.00E+00 | -1.52 |
| Nkrf               | NF-kappaB repressing factor                                       | 77286  | 1441325_at   | 1.34E-02 | 1.00E+00 | -1.52 |
| ---                | Transcribed locus                                                 | ---    | 1440550_at   | 1.92E-03 | 8.25E-01 | -1.52 |
| Pibf1              | progesterone immunomodulatory binding factor 1                    | 52023  | 1431618_a_at | 9.99E-03 | 1.00E+00 | -1.52 |
| Rerg               | RAS-like, estrogen-regulated, growth-inhibitor                    | 232441 | 1451236_at   | 1.50E-02 | 1.00E+00 | -1.51 |
| EG331480           | predicted gene, EG331480                                          | 331480 | 1440060_at   | 4.27E-03 | 1.00E+00 | -1.51 |
| Apol11b            | apolipoprotein L 11b                                              | 328563 | 1457307_at   | 2.01E-02 | 1.00E+00 | -1.51 |
| Cenpa              | centromere protein A                                              | 12615  | 1450842_a_at | 1.03E-02 | 1.00E+00 | -1.51 |
| Slc39a6            | solute carrier family 39 (metal ion transporter), member 6        | 106957 | 1447893_x_at | 3.89E-02 | 1.00E+00 | -1.51 |
| Ppm1d              | protein phosphatase 1D magnesium-dependent, delta isoform         | 53892  | 1449092_at   | 4.34E-02 | 1.00E+00 | -1.51 |
| Tcea2              | transcription elongation factor A (SII), 2                        | 21400  | 1440791_x_at | 1.07E-02 | 1.00E+00 | -1.51 |
| Cln8               | ceroid-lipofuscinosis, neuronal 8                                 | 26889  | 1455745_at   | 9.16E-03 | 1.00E+00 | -1.50 |
| Ankrd10            | ankyrin repeat domain 10                                          | 102334 | 1429304_at   | 2.28E-02 | 1.00E+00 | -1.49 |
| 4930524O07Rik      | RIKEN cDNA 4930524O07 gene                                        | 406209 | 1439134_s_at | 1.72E-04 | 1.85E-01 | -1.49 |
| Numb1              | numb-like                                                         | 18223  | 1416491_at   | 3.52E-03 | 1.00E+00 | 1.50  |
| Bmpr1a             | bone morphogenetic protein receptor, type 1A                      | 12166  | 1425493_at   | 9.54E-02 | 1.00E+00 | 1.50  |
| Padi2              | peptidyl arginine deiminase, type II                              | 18600  | 1418252_at   | 4.54E-02 | 1.00E+00 | 1.50  |
| ---                | Transcribed locus                                                 | ---    | 1438880_at   | 3.91E-03 | 1.00E+00 | 1.50  |
| Wnt10a             | wingless related MMTV integration site 10a                        | 22409  | 1460657_at   | 1.69E-02 | 1.00E+00 | 1.50  |
| St5                | suppression of tumorigenicity 5                                   | 76954  | 1428372_at   | 4.76E-02 | 1.00E+00 | 1.50  |
| ---                | Transcribed locus                                                 | ---    | 1439678_at   | 2.78E-02 | 1.00E+00 | 1.50  |
| ---                | Transcribed locus                                                 | ---    | 1444069_at   | 1.81E-02 | 1.00E+00 | 1.50  |
| lfnar2             | interferon (alpha and beta) receptor 2                            | 15976  | 1440169_x_at | 9.00E-03 | 1.00E+00 | 1.50  |
| ---                | Transcribed locus                                                 | ---    | 1443075_at   | 2.36E-02 | 1.00E+00 | 1.50  |
| OTTMUSG00000010657 | predicted gene, OTTMUSG00000010657                                | 666532 | 1451477_at   | 1.69E-04 | 1.85E-01 | 1.50  |
| Gigyf2             | GRB10 interacting GYF protein 2                                   | 227331 | 1451397_at   | 4.64E-02 | 1.00E+00 | 1.50  |
| Ablim3             | actin binding LIM protein family, member 3                        | 319713 | 1434013_at   | 4.15E-02 | 1.00E+00 | 1.51  |
| ---                | ---                                                               | ---    | 1446504_at   | 4.27E-02 | 1.00E+00 | 1.51  |
| A230071A22Rik      | RIKEN cDNA A230071A22 gene                                        | 320380 | 1442168_at   | 2.43E-02 | 1.00E+00 | 1.51  |
| Gpc6               | glypican 6                                                        | 23888  | 1441438_at   | 2.13E-03 | 8.66E-01 | 1.51  |
| Arhgef1            | Rho guanine nucleotide exchange factor (GEF) 1                    | 16801  | 1421164_a_at | 7.32E-02 | 1.00E+00 | 1.51  |

|               |                                                                                                         |        |              |          |          |      |
|---------------|---------------------------------------------------------------------------------------------------------|--------|--------------|----------|----------|------|
| Smoc2         | SPARC related modular calcium binding 2                                                                 | 64074  | 1415935_at   | 6.52E-02 | 1.00E+00 | 1.51 |
| Cth           | cystathionase (cystathionine gamma-lyase)                                                               | 107869 | 1426243_at   | 3.34E-02 | 1.00E+00 | 1.51 |
| ---           | Transcribed locus                                                                                       | ---    | 1440563_at   | 1.03E-01 | 1.00E+00 | 1.51 |
| ---           | ---                                                                                                     | ---    | 1440650_at   | 5.84E-02 | 1.00E+00 | 1.51 |
| ---           | Transcribed locus                                                                                       | ---    | 1435858_at   | 3.63E-02 | 1.00E+00 | 1.51 |
| ---           | Transcribed locus, strongly similar to NP_002237.1 potassium channel, subfamily                         | ---    | 1456813_at   | 9.22E-03 | 1.00E+00 | 1.51 |
| Ptpn11        | protein tyrosine phosphatase, non-receptor type 11                                                      | 19247  | 1427699_a_at | 3.66E-02 | 1.00E+00 | 1.52 |
| Spag5         | sperm associated antigen 5                                                                              | 54141  | 1433892_at   | 1.06E-02 | 1.00E+00 | 1.52 |
| ---           | Transcribed locus                                                                                       | ---    | 1456979_at   | 1.01E-01 | 1.00E+00 | 1.52 |
| Hr            | hairless                                                                                                | 15460  | 1435950_at   | 2.92E-02 | 1.00E+00 | 1.52 |
| ---           | ---                                                                                                     | ---    | 1459388_at   | 1.17E-02 | 1.00E+00 | 1.52 |
| Grin2c        | glutamate receptor, ionotropic, NMDA2C (epsilon 3)                                                      | 14813  | 1449245_at   | 4.26E-02 | 1.00E+00 | 1.52 |
| Gmeb2         | glucocorticoid modulatory element binding protein 2                                                     | 229004 | 1454818_at   | 6.39E-02 | 1.00E+00 | 1.52 |
| Klhl20        | kelch-like 20 (Drosophila)                                                                              | 226541 | 1454994_at   | 1.50E-02 | 1.00E+00 | 1.52 |
| Plexb2        | plexin B2                                                                                               | 140570 | 1416683_at   | 3.34E-03 | 1.00E+00 | 1.52 |
| Smoc2         | SPARC related modular calcium binding 2                                                                 | 64074  | 1431362_a_at | 3.35E-02 | 1.00E+00 | 1.53 |
| Morn1         | MORN repeat containing 1                                                                                | 76866  | 1433180_at   | 6.42E-02 | 1.00E+00 | 1.53 |
| Trhr          | thyrotropin releasing hormone receptor                                                                  | 22045  | 1449571_at   | 7.41E-02 | 1.00E+00 | 1.53 |
| Jun           | Jun oncogene                                                                                            | 16476  | 1417409_at   | 3.84E-02 | 1.00E+00 | 1.53 |
| 2900076A13Rik | RIKEN cDNA 2900076A13 gene                                                                              | 73002  | 1458869_at   | 4.94E-02 | 1.00E+00 | 1.53 |
| ---           | Transcribed locus                                                                                       | ---    | 1445204_at   | 5.03E-02 | 1.00E+00 | 1.53 |
| Tekt1         | tektin 1                                                                                                | 21689  | 1432075_a_at | 1.97E-02 | 1.00E+00 | 1.53 |
| Kcna6         | potassium voltage-gated channel, shaker-related, subfamily, member 6                                    | 16494  | 1456954_at   | 6.39E-02 | 1.00E+00 | 1.53 |
| Daam2         | dishevelled associated activator of morphogenesis 2                                                     | 76441  | 1430247_at   | 2.21E-03 | 8.80E-01 | 1.53 |
| Ckap4         | cytoskeleton-associated protein 4                                                                       | 216197 | 1452181_at   | 2.47E-03 | 9.34E-01 | 1.53 |
| Cited2        | Cbp/p300-interacting transactivator, with Glu/Asp-rich carboxy-terminal domain, NEDD4 binding protein 2 | 17684  | 1421267_a_at | 2.51E-02 | 1.00E+00 | 1.53 |
| N4bp2         | NEDD4 binding protein 2                                                                                 | 333789 | 1434394_at   | 4.19E-02 | 1.00E+00 | 1.53 |
| Arpc2         | Actin related protein 2/3 complex, subunit 2                                                            | 76709  | 1442295_at   | 4.72E-02 | 1.00E+00 | 1.54 |
| Sh3rf1        | SH3 domain containing ring finger 1                                                                     | 59009  | 1421271_at   | 3.27E-02 | 1.00E+00 | 1.54 |
| Tuba8         | tubulin, alpha 8                                                                                        | 53857  | 1446771_at   | 7.64E-02 | 1.00E+00 | 1.54 |
| 1300012G16Rik | RIKEN cDNA 1300012G16 gene                                                                              | 71772  | 1423426_at   | 1.85E-02 | 1.00E+00 | 1.54 |
| ---           | Transcribed locus                                                                                       | ---    | 1440621_at   | 2.78E-02 | 1.00E+00 | 1.54 |
| Alcam         | activated leukocyte cell adhesion molecule                                                              | 11658  | 1443086_at   | 6.94E-02 | 1.00E+00 | 1.54 |
| Itch          | itchy, E3 ubiquitin protein ligase                                                                      | 16396  | 1431316_at   | 2.78E-02 | 1.00E+00 | 1.54 |
| Cgnl1         | cingulin-like 1                                                                                         | 68178  | 1452309_at   | 6.24E-02 | 1.00E+00 | 1.54 |
| Vps39         | vacuolar protein sorting 39 (yeast)                                                                     | 269338 | 1425474_a_at | 9.46E-05 | 1.26E-01 | 1.54 |
| Bat2          | HLA-B associated transcript 2                                                                           | 53761  | 1422799_at   | 7.02E-03 | 1.00E+00 | 1.55 |
| 6030400A10Rik | RIKEN cDNA 6030400A10 gene                                                                              | 77069  | 1433203_at   | 4.26E-02 | 1.00E+00 | 1.55 |
| ---           | ---                                                                                                     | ---    | 1456717_at   | 9.67E-02 | 1.00E+00 | 1.55 |
| Itgb5         | integrin beta 5                                                                                         | 16419  | 1417533_a_at | 6.56E-03 | 1.00E+00 | 1.55 |
| Flt1          | FMS-like tyrosine kinase 1                                                                              | 14254  | 1440926_at   | 7.39E-02 | 1.00E+00 | 1.55 |
| Dab2ip        | disabled homolog 2 (Drosophila) interacting protein                                                     | 69601  | 1441170_a_at | 7.04E-03 | 1.00E+00 | 1.55 |
| Asah3l        | N-acylsphingosine amidohydrolase 3-like                                                                 | 230379 | 1451355_at   | 2.32E-02 | 1.00E+00 | 1.55 |
| ---           | ---                                                                                                     | ---    | 1445338_at   | 5.63E-02 | 1.00E+00 | 1.56 |
| ---           | Transcribed locus                                                                                       | ---    | 1442622_at   | 4.83E-02 | 1.00E+00 | 1.56 |
| Pbx2          | pre B-cell leukemia transcription factor 2                                                              | 18515  | 1418894_s_at | 1.83E-02 | 1.00E+00 | 1.56 |
| Gpr153        | G protein-coupled receptor 153                                                                          | 100129 | 1426973_at   | 2.78E-03 | 9.65E-01 | 1.56 |
| ---           | Transcribed locus                                                                                       | ---    | 1443095_at   | 6.81E-02 | 1.00E+00 | 1.56 |
| 2610024B07Rik | RIKEN cDNA 2610024B07 gene                                                                              | 269987 | 1429556_at   | 4.87E-02 | 1.00E+00 | 1.56 |
| Zmym6         | zinc finger, MYM-type 6                                                                                 | 100177 | 1434193_at   | 3.48E-03 | 1.00E+00 | 1.57 |
| ---           | Transcribed locus                                                                                       | ---    | 1439236_at   | 4.40E-02 | 1.00E+00 | 1.57 |
| Crkrs         | Cdc2-related kinase, arginine/serine-rich                                                               | 69131  | 1438831_at   | 5.86E-03 | 1.00E+00 | 1.57 |
| Scel          | sciellin                                                                                                | 64929  | 1422837_at   | 1.42E-02 | 1.00E+00 | 1.57 |
| D930050J11    | hypothetical D930050J11                                                                                 | 414326 | 1457484_at   | 5.90E-04 | 3.85E-01 | 1.57 |
| ---           | Transcribed locus                                                                                       | ---    | 1455624_at   | 9.81E-02 | 1.00E+00 | 1.58 |
| Bcl2l11       | BCL2-like 11 (apoptosis facilitator)                                                                    | 12125  | 1456005_a_at | 5.28E-02 | 1.00E+00 | 1.58 |
| Unc5a         | unc-5 homolog A (C. elegans)                                                                            | 107448 | 1434095_at   | 3.20E-02 | 1.00E+00 | 1.58 |
| C79242        | expressed sequence C79242                                                                               | 98068  | 1442494_at   | 7.85E-02 | 1.00E+00 | 1.58 |
| Nav2          | neuron navigator 2                                                                                      | 78286  | 1441353_at   | 1.35E-02 | 1.00E+00 | 1.58 |
| ---           | ---                                                                                                     | ---    | 1442593_at   | 8.11E-03 | 1.00E+00 | 1.58 |
| Grid2         | glutamate receptor, ionotropic, delta 2                                                                 | 14804  | 1421436_at   | 6.82E-03 | 1.00E+00 | 1.59 |

|                   |                                                                                   |        |              |          |          |      |
|-------------------|-----------------------------------------------------------------------------------|--------|--------------|----------|----------|------|
| Flt1              | FMS-like tyrosine kinase 1                                                        | 14254  | 1454037_a_at | 3.19E-02 | 1.00E+00 | 1.59 |
| Zfhx4             | zinc finger homeodomain 4                                                         | 80892  | 1421433_at   | 1.00E-01 | 1.00E+00 | 1.59 |
| ---               | Transcribed locus, strongly similar to NP_009049.2 triple functional domain (PTP) | ---    | 1446593_at   | 4.74E-02 | 1.00E+00 | 1.59 |
| Pcdhb15           | protocadherin beta 15                                                             | 93886  | 1443421_s_at | 4.37E-03 | 1.00E+00 | 1.60 |
| ---               | ---                                                                               | ---    | 1447204_at   | ?        | 1.23E-07 | 1.60 |
| Mafg              | v-maf musculoaponeurotic fibrosarcoma oncogene family, protein G (avian)          | 17134  | 1448916_at   | 2.06E-04 | 2.06E-01 | 1.60 |
| Eef2k             | eukaryotic elongation factor-2 kinase                                             | 13631  | 1449013_at   | 1.58E-02 | 1.00E+00 | 1.60 |
| Pmaip1            | phorbol-12-myristate-13-acetate-induced protein 1                                 | 58801  | 1418203_at   | 6.64E-03 | 1.00E+00 | 1.60 |
| Cox6a2            | cytochrome c oxidase, subunit VI a, polypeptide 2                                 | 12862  | 1417607_at   | 9.88E-04 | 5.44E-01 | 1.60 |
| Col23a1           | collagen, type XXIII, alpha 1                                                     | 237759 | 1440911_at   | 1.60E-02 | 1.00E+00 | 1.60 |
| ---               | ---                                                                               | ---    | X00686_M_at  | 8.89E-02 | 1.00E+00 | 1.60 |
| March2            | membrane-associated ring finger (C3HC4) 2                                         | 224703 | 1439540_at   | 1.46E-02 | 1.00E+00 | 1.61 |
| 6430537K16Rik     | RIKEN cDNA 6430537K16 gene                                                        | 320480 | 1438878_at   | 7.66E-02 | 1.00E+00 | 1.61 |
| ENSMUSG0000074462 | predicted gene, ENSMUSG00000074462                                                | 100038 | 1444174_at   | 2.27E-02 | 1.00E+00 | 1.61 |
| Rad18             | RAD18 homolog (S. cerevisiae)                                                     | 58186  | 1443954_at   | 3.85E-02 | 1.00E+00 | 1.61 |
| Pik3r6            | phosphoinositide-3-kinase, regulatory subunit 6                                   | 104709 | 1437956_at   | 4.10E-03 | 1.00E+00 | 1.61 |
| Flna              | filamin, alpha                                                                    | 192176 | 1426677_at   | 1.65E-02 | 1.00E+00 | 1.61 |
| Neurl             | neuritized-like homolog (Drosophila)                                              | 18011  | 1456854_at   | 4.53E-02 | 1.00E+00 | 1.61 |
| Dpp6              | dipeptidylpeptidase 6                                                             | 13483  | 1439748_at   | 6.60E-02 | 1.00E+00 | 1.61 |
| Rhoc              | ras homolog gene family, member C                                                 | 11853  | 1448605_at   | 4.54E-02 | 1.00E+00 | 1.61 |
| Slc4a2            | solute carrier family 4 (anion exchanger), member 2                               | 20535  | 1416637_at   | 3.16E-02 | 1.00E+00 | 1.62 |
| AI853363          | expressed sequence AI853363                                                       | 98471  | 1442887_at   | 4.15E-03 | 1.00E+00 | 1.62 |
| Mapt              | microtubule-associated protein tau                                                | 17762  | 1455028_at   | 7.94E-02 | 1.00E+00 | 1.62 |
| Ap1s2             | adaptor-related protein complex 1, sigma 2 subunit                                | 108012 | 1460036_at   | 2.24E-02 | 1.00E+00 | 1.62 |
| Gnb4              | guanine nucleotide binding protein (G protein), beta 4                            | 14696  | 1419469_at   | 1.57E-02 | 1.00E+00 | 1.62 |
| ---               | ---                                                                               | ---    | 1443335_at   | 6.88E-06 | 1.83E-02 | 1.62 |
| ---               | ---                                                                               | ---    | 1440033_at   | 5.38E-02 | 1.00E+00 | 1.62 |
| Epb4.1            | erythrocyte protein band 4.1                                                      | 269587 | 1444150_at   | 1.99E-02 | 1.00E+00 | 1.62 |
| Htr7              | 5-hydroxytryptamine (serotonin) receptor 7                                        | 15566  | 1435332_at   | 2.01E-02 | 1.00E+00 | 1.62 |
| Coro1a            | coronin, actin binding protein 1A                                                 | 12721  | 1435288_at   | 1.46E-03 | 6.84E-01 | 1.63 |
| Doc2b             | double C2, beta                                                                   | 13447  | 1420667_at   | 4.68E-02 | 1.00E+00 | 1.63 |
| Wdr90             | WD repeat domain 90                                                               | 106618 | 1426767_at   | 3.13E-02 | 1.00E+00 | 1.63 |
| Rgs6              | regulator of G-protein signaling 6                                                | 50779  | 1452399_at   | 1.88E-02 | 1.00E+00 | 1.63 |
| Tuba8             | tubulin, alpha 8                                                                  | 53857  | 1419518_at   | 2.18E-02 | 1.00E+00 | 1.63 |
| Tbc1d1            | TBC1 domain family, member 1                                                      | 57915  | 1447016_at   | 8.31E-02 | 1.00E+00 | 1.63 |
| Inpp5a            | inositol polyphosphate-5-phosphatase A                                            | 212111 | 1433605_at   | 1.38E-03 | 6.78E-01 | 1.63 |
| Cacna2d1          | calcium channel, voltage-dependent, alpha2/delta subunit 1                        | 12293  | 1441608_at   | 8.16E-02 | 1.00E+00 | 1.64 |
| Plxna3            | plexin A3                                                                         | 18846  | 1420996_at   | 2.14E-02 | 1.00E+00 | 1.64 |
| A630057N01Rik     | RIKEN cDNA A630057N01 gene                                                        | 320057 | 1456345_at   | 9.40E-02 | 1.00E+00 | 1.65 |
| ---               | ---                                                                               | ---    | 1440052_at   | 2.40E-02 | 1.00E+00 | 1.65 |
| Grik5             | glutamate receptor, ionotropic, kainate 5 (gamma 2)                               | 14809  | 1418784_at   | 1.89E-02 | 1.00E+00 | 1.65 |
| ---               | Transcribed locus, moderately similar to NP_571986.1 acidic nuclear phosphoprote  | ---    | 1441666_at   | 7.31E-07 | 2.75E-03 | 1.65 |
| Zfp438            | zinc finger protein 438                                                           | 240186 | 1457059_at   | 4.38E-02 | 1.00E+00 | 1.65 |
| ---               | Transcribed locus                                                                 | ---    | 1446150_at   | 9.40E-02 | 1.00E+00 | 1.65 |
| ---               | ---                                                                               | ---    | 1447580_at   | 2.07E-02 | 1.00E+00 | 1.65 |
| Sfmbt2            | Scm-like with four mbt domains 2                                                  | 353282 | 1434353_at   | 1.17E-02 | 1.00E+00 | 1.66 |
| Pip5k1b           | phosphatidylinositol-4-phosphate 5-kinase, type 1 beta                            | 18719  | 1421834_at   | 5.59E-02 | 1.00E+00 | 1.66 |
| Antxr1            | anthrax toxin receptor 1                                                          | 69538  | 1431995_at   | 2.73E-04 | 2.33E-01 | 1.66 |
| Satb1             | special AT-rich sequence binding protein 1                                        | 20230  | 1439449_at   | 1.07E-02 | 1.00E+00 | 1.66 |
| Lmna              | lamin A                                                                           | 16905  | 1457670_s_at | 2.47E-02 | 1.00E+00 | 1.66 |
| D430042O09Rik     | RIKEN cDNA D430042O09 gene                                                        | 233865 | 1435366_at   | 5.31E-02 | 1.00E+00 | 1.67 |
| 4932441J04Rik     | RIKEN cDNA 4932441J04 gene                                                        | 319216 | 1436563_at   | 2.61E-02 | 1.00E+00 | 1.67 |
| Tln1              | talin 1                                                                           | 21894  | 1457782_at   | 5.00E-02 | 1.00E+00 | 1.67 |
| ---               | ---                                                                               | ---    | 1447706_at   | 5.63E-02 | 1.00E+00 | 1.67 |
| Rrm1              | ribonucleotide reductase M1                                                       | 20133  | 1415878_at   | 7.12E-04 | 4.34E-01 | 1.68 |
| Oplah             | 5-oxoprolinase (ATP-hydrolysing)                                                  | 75475  | 1424359_at   | 4.49E-02 | 1.00E+00 | 1.68 |
| Figf              | C-fos induced growth factor                                                       | 14205  | 1438954_x_at | 1.89E-02 | 1.00E+00 | 1.68 |
| ---               | ---                                                                               | ---    | 1457022_at   | 4.64E-02 | 1.00E+00 | 1.68 |
| Gpr56             | G protein-coupled receptor 56                                                     | 14766  | 1433485_x_at | 5.07E-03 | 1.00E+00 | 1.68 |
| ---               | Transcribed locus                                                                 | ---    | 1456864_at   | 4.69E-02 | 1.00E+00 | 1.69 |



|               |                                                                                  |        |              |          |          |      |
|---------------|----------------------------------------------------------------------------------|--------|--------------|----------|----------|------|
| ---           | Transcribed locus                                                                | ---    | 1443325_at   | 3.28E-02 | 1.00E+00 | 1.69 |
| Hrh1          | histamine receptor H1                                                            | 15465  | 1438494_at   | 3.54E-03 | 1.00E+00 | 1.70 |
| ---           | Transcribed locus                                                                | ---    | 1445032_at   | 9.28E-02 | 1.00E+00 | 1.70 |
| Ctr9          | Ctr9, Paf1/RNA polymerase II complex component, homolog (S. cerevisiae)          | 22083  | 1442240_at   | 3.90E-02 | 1.00E+00 | 1.70 |
| Oaf           | OAF homolog (Drosophila)                                                         | 102644 | 1424086_at   | 1.87E-04 | 1.94E-01 | 1.71 |
| ---           | Transcribed locus                                                                | ---    | 1442224_at   | 1.67E-02 | 1.00E+00 | 1.71 |
| Rgs16         | regulator of G-protein signaling 16                                              | 19734  | 1426037_a_at | 4.07E-02 | 1.00E+00 | 1.72 |
| RP23-143A14.5 | candidate tumor suppressor OVCA2                                                 | 246257 | 1437350_at   | 1.61E-03 | 7.23E-01 | 1.72 |
| Tcap          | titin-cap                                                                        | 21393  | 1423145_a_at | 8.95E-06 | 2.24E-02 | 1.72 |
| 5730411F24Rik | RIKEN cDNA 5730411F24 gene                                                       | 70507  | 1430470_at   | 2.20E-04 | 2.06E-01 | 1.73 |
| ---           | ---                                                                              | ---    | 1447454_at   | 3.38E-02 | 1.00E+00 | 1.73 |
| Rassf3        | Ras association (RalGDS/AF-6) domain family member 3                             | 192678 | 1448546_at   | 7.10E-02 | 1.00E+00 | 1.73 |
| ---           | Transcribed locus                                                                | ---    | 1457279_at   | 5.09E-03 | 1.00E+00 | 1.74 |
| Fbxl11        | F-box and leucine-rich repeat protein 11                                         | 225876 | 1435329_at   | 7.55E-02 | 1.00E+00 | 1.74 |
| ---           | ---                                                                              | ---    | 1441498_at   | 3.90E-02 | 1.00E+00 | 1.74 |
| Trio          | Triple functional domain (PTPRF interacting)                                     | 223435 | 1457492_at   | 8.55E-03 | 1.00E+00 | 1.74 |
| B930096F20Rik | RIKEN cDNA B930096F20 gene                                                       | 319332 | 1442418_at   | 7.93E-03 | 1.00E+00 | 1.74 |
| 2610018G03Rik | RIKEN cDNA 2610018G03 gene                                                       | 70415  | 1419033_at   | 2.16E-02 | 1.00E+00 | 1.74 |
| Lrfn1         | leucine rich repeat and fibronectin type III domain containing 1                 | 80749  | 1444669_at   | 5.08E-05 | 7.91E-02 | 1.75 |
| ---           | ---                                                                              | ---    | 1446641_at   | 4.18E-02 | 1.00E+00 | 1.75 |
| Trpm3         | transient receptor potential cation channel, subfamily M, member 3               | 226025 | 1456923_at   | 8.03E-02 | 1.00E+00 | 1.75 |
| Tenc1         | tensin like C1 domain-containing phosphatase                                     | 209039 | 1452264_at   | 9.61E-02 | 1.00E+00 | 1.75 |
| A330043J11Rik | RIKEN cDNA A330043J11 gene                                                       | 320261 | 1440018_at   | 8.11E-03 | 1.00E+00 | 1.75 |
| Pde4a         | phosphodiesterase 4A, cAMP specific                                              | 18577  | 1421535_a_at | 1.87E-02 | 1.00E+00 | 1.76 |
| Lgr5          | leucine rich repeat containing G protein coupled receptor 5                      | 14160  | 1450988_at   | 5.52E-04 | 3.71E-01 | 1.76 |
| Myo5c         | myosin VC                                                                        | 208943 | 1424933_at   | 1.15E-03 | 5.97E-01 | 1.76 |
| Fgf22         | fibroblast growth factor 22                                                      | 67112  | 1460296_a_at | 1.51E-02 | 1.00E+00 | 1.77 |
| Tifa          | TRAF-interacting protein with forkhead-associated domain                         | 637082 | 1426501_a_at | 8.53E-02 | 1.00E+00 | 1.77 |
| Pcdh21        | protocadherin 21                                                                 | 170677 | 1418304_at   | 1.07E-02 | 1.00E+00 | 1.77 |
| Macf1         | Microtubule-actin crosslinking factor 1                                          | 11426  | 1439582_at   | 4.02E-03 | 1.00E+00 | 1.78 |
| AU018740      | expressed sequence AU018740                                                      | 98528  | 1441354_at   | 3.90E-03 | 1.00E+00 | 1.79 |
| Fancd2        | Fanconi anemia, complementation group D2                                         | 211651 | 1438339_at   | 5.60E-06 | 1.69E-02 | 1.79 |
| ---           | ---                                                                              | ---    | 1441437_at   | 3.35E-03 | 1.00E+00 | 1.79 |
| Dtx1          | deltex 1 homolog (Drosophila)                                                    | 14357  | 1458643_at   | 6.23E-03 | 1.00E+00 | 1.79 |
| Cacna1b       | calcium channel, voltage-dependent, N type, alpha 1B subunit                     | 12287  | 1425812_a_at | 3.58E-04 | 2.78E-01 | 1.79 |
| ---           | ---                                                                              | ---    | 1445200_at   | 2.34E-02 | 1.00E+00 | 1.80 |
| Mxra7         | matrix-remodelling associated 7                                                  | 67622  | 1440975_at   | 1.58E-07 | 8.91E-04 | 1.80 |
| ---           | Transcribed locus                                                                | ---    | 1445689_at   | 5.92E-02 | 1.00E+00 | 1.80 |
| C130051F05Rik | RIKEN cDNA C130051F05 gene                                                       | 320348 | 1459433_at   | 1.84E-02 | 1.00E+00 | 1.80 |
| 6330406115Rik | RIKEN cDNA 6330406115 gene                                                       | 70717  | 1426937_at   | 1.36E-02 | 1.00E+00 | 1.80 |
| Cdt1          | chromatin licensing and DNA replication factor 1                                 | 67177  | 1424143_a_at | 1.91E-02 | 1.00E+00 | 1.81 |
| Slc14a1       | solute carrier family 14 (urea transporter), member 1                            | 108052 | 1428114_at   | 1.44E-03 | 6.84E-01 | 1.81 |
| Rapgef3       | Rap guanine nucleotide exchange factor (GEF) 3                                   | 223864 | 1438590_at   | 2.90E-03 | 9.68E-01 | 1.81 |
| LOC552902     | hypothetical LOC552902                                                           | 552902 | 1456659_at   | 6.70E-06 | 1.83E-02 | 1.81 |
| Hhatl         | hedgehog acyltransferase-like                                                    | 74770  | 1424553_at   | 7.00E-04 | 4.32E-01 | 1.82 |
| Wnt7a         | wingless-related MMTV integration site 7A                                        | 22421  | 1423367_at   | 8.49E-04 | 4.97E-01 | 1.84 |
| ---           | ---                                                                              | ---    | 1457317_at   | 2.42E-03 | 9.34E-01 | 1.84 |
| Bean          | brain expressed, associated with Nedd4                                           | 65115  | 1452451_at   | 7.84E-03 | 1.00E+00 | 1.85 |
| Hspa8         | heat shock protein 8                                                             | 666031 | 1431182_at   | 1.57E-02 | 1.00E+00 | 1.85 |
| Oprk1         | opioid receptor, kappa 1                                                         | 18387  | 1451813_at   | 6.60E-03 | 1.00E+00 | 1.86 |
| ---           | Transcribed locus                                                                | ---    | 1447612_x_at | 2.01E-02 | 1.00E+00 | 1.89 |
| ---           | ---                                                                              | ---    | 1446943_at   | 6.01E-03 | 1.00E+00 | 1.90 |
| Tor1b         | torsin family 1, member B                                                        | 30934  | 1417819_at   | 1.24E-03 | 6.30E-01 | 1.91 |
| Col11a1       | collagen, type XI, alpha 1                                                       | 12814  | 1449154_at   | 1.57E-02 | 1.00E+00 | 1.91 |
| Pth2r         | parathyroid hormone 2 receptor                                                   | 213527 | 1452129_at   | 6.14E-04 | 3.90E-01 | 1.92 |
| Cwf19l2       | CWF19-like 2, cell cycle control (S. pombe)                                      | 244672 | 1453688_at   | 2.36E-02 | 1.00E+00 | 1.93 |
| Zfx4          | zinc finger homeodomain 4                                                        | 80892  | 1437556_at   | 8.30E-03 | 1.00E+00 | 1.94 |
| Extl1         | exostoses (multiple)-like 1                                                      | 56219  | 1423305_at   | 1.02E-03 | 5.54E-01 | 1.95 |
| Myh7b         | myosin, heavy chain 7B, cardiac muscle, beta                                     | 668940 | 1444305_at   | 7.82E-04 | 4.70E-01 | 1.95 |
| Sema7a        | sema domain, immunoglobulin domain (Ig), and GPI membrane anchor, (semaphorin) 7 | 20361  | 1422040_at   | 1.82E-02 | 1.00E+00 | 1.97 |

|               |                                                                                  |        |              |          |          |      |
|---------------|----------------------------------------------------------------------------------|--------|--------------|----------|----------|------|
| 4930546H06Rik | RIKEN cDNA 4930546H06 gene                                                       | 75202  | 1453713_s_at | 5.74E-03 | 1.00E+00 | 1.99 |
| Adam33        | a disintegrin and metallopeptidase domain 33                                     | 110751 | 1451904_a_at | 8.38E-05 | 1.18E-01 | 2.01 |
| ---           | Transcribed locus                                                                | ---    | 1446514_at   | 6.83E-04 | 4.28E-01 | 2.02 |
| ---           | Transcribed locus                                                                | ---    | 1439632_at   | 3.21E-02 | 1.00E+00 | 2.03 |
| Spryd3        | SPRY domain containing 3                                                         | 223918 | 1452323_at   | 8.71E-02 | 1.00E+00 | 2.03 |
| Vps54         | vacuolar protein sorting 54 (yeast)                                              | 245944 | 1456810_at   | 2.74E-04 | 2.33E-01 | 2.05 |
| Sgce          | sarcoglycan, epsilon                                                             | 20392  | 1443518_at   | 4.41E-02 | 1.00E+00 | 2.07 |
| Npas1         | neuronal PAS domain protein 1                                                    | 18142  | 1420801_at   | 1.86E-02 | 1.00E+00 | 2.07 |
| Sema4f        | sema domain, immunoglobulin domain (Ig), TM domain, and short cytoplasmic domain | 20355  | 1419328_at   | 3.40E-05 | 6.39E-02 | 2.08 |
| Skiv2l2       | superkiller viralicidic activity 2-like 2 (S. cerevisiae)                        | 72198  | 1447517_at   | 9.55E-02 | 1.00E+00 | 2.09 |
| Pctk1         | PCTAIRE-motif protein kinase 1                                                   | 18555  | 1443296_at   | 2.46E-03 | 9.34E-01 | 2.10 |
| Gh            | growth hormone                                                                   | 14599  | 1437522_x_at | 4.90E-02 | 1.00E+00 | 2.20 |
| Col11a1       | collagen, type XI, alpha 1                                                       | 12814  | 1418599_at   | 5.17E-03 | 1.00E+00 | 2.33 |
| 2310047B19Rik | RIKEN cDNA 2310047B19 gene                                                       | 66962  | 1452201_at   | 7.49E-02 | 1.00E+00 | 2.35 |
| 6330514A18Rik | RIKEN cDNA 6330514A18 gene                                                       | 216166 | 1434984_at   | 7.23E-05 | 1.09E-01 | 2.41 |
| Gh            | growth hormone                                                                   | 14599  | 1460613_x_at | 9.66E-02 | 1.00E+00 | 2.46 |
| RP23-296G23.1 | novel protein similar to odorant binding protein lb Obp1b                        | 236874 | 1449597_at   | 1.02E-01 | 1.00E+00 | 2.49 |
| Igk-C         | immunoglobulin kappa chain, constant region                                      | 628498 | 1427660_x_at | 7.36E-02 | 1.00E+00 | 2.50 |
| Gh            | growth hormone                                                                   | 14599  | 1456595_x_at | 6.47E-02 | 1.00E+00 | 2.57 |
| Ngp           | neutrophilic granule protein                                                     | 18054  | 1418722_at   | 7.18E-02 | 1.00E+00 | 2.83 |
| Cartpt        | CART prepropeptide                                                               | 27220  | 1422825_at   | 4.66E-05 | 7.50E-02 | 3.10 |
| ---           | Transcribed locus                                                                | ---    | 1456053_at   | 3.44E-04 | 2.75E-01 | 3.60 |
| S100a8        | S100 calcium binding protein A8 (calgranulin A)                                  | 20201  | 1419394_s_at | 6.23E-02 | 1.00E+00 | 3.90 |
| S100a9        | S100 calcium binding protein A9 (calgranulin B)                                  | 20202  | 1448756_at   | 8.18E-02 | 1.00E+00 | 4.11 |

**Table 3** Results of the ANOVA calculation of Mouse  $Qk^{qt/gt}$  E12.5 dorsal telencephalon vs wildtype ( $p < 0.05$ ;  $FC < -1.5$  or  $> 1.5$ )

| Gene Symbol   | Gene Title                                                                       | Entrez Gene | ID           | p-value  | FDR-adjusted p-value | Fold-Change |
|---------------|----------------------------------------------------------------------------------|-------------|--------------|----------|----------------------|-------------|
| Myst4         | MYST histone acetyltransferase monocytic leukemia 4                              | 54169       | 1447758_x_at | 5.83E-09 | 3.76E-05             | -5.17       |
| Jakmip1       | janus kinase and microtubule interacting protein 1                               | 76071       | 1441317_x_at | 2.10E-07 | 4.12E-04             | -4.25       |
| ---           | Transcribed locus                                                                | ---         | 1455528_at   | 1.19E-08 | 5.53E-05             | -3.85       |
| ---           | Transcribed locus                                                                | ---         | 1436633_at   | 6.57E-08 | 1.74E-04             | -2.88       |
| ---           | Transcribed locus                                                                | ---         | 1441670_at   | 2.47E-02 | 8.91E-01             | -2.81       |
| Tmod3         | Tropomodulin 3                                                                   | 50875       | 1455708_at   | 4.90E-07 | 7.13E-04             | -2.55       |
| ---           | ---                                                                              | ---         | 1459322_at   | 3.65E-06 | 3.10E-03             | -2.46       |
| ---           | Transcribed locus, weakly similar to XP_851502.1 PREDICTED: similar to Retroviru | ---         | 1447014_at   | 6.16E-06 | 4.41E-03             | -2.42       |
| Nrk           | Nik related kinase                                                               | 27206       | 1450079_at   | 6.41E-06 | 4.52E-03             | -2.35       |
| Gria3         | glutamate receptor, ionotropic, AMPA3 (alpha 3)                                  | 53623       | 1434728_at   | 1.29E-05 | 7.99E-03             | -2.34       |
| Gpr123        | G protein-coupled receptor 123                                                   | 52389       | 1459750_s_at | 3.15E-03 | 3.24E-01             | -2.28       |
| ---           | Transcribed locus                                                                | ---         | 1444530_at   | 2.65E-03 | 2.90E-01             | -2.23       |
| Cacna1b       | calcium channel, voltage-dependent, N type, alpha 1B subunit                     | 12287       | 1439612_at   | 5.95E-04 | 1.16E-01             | -2.21       |
| 3110006E14Rik | RIKEN cDNA 3110006E14 gene                                                       | 76980       | 1452779_at   | 3.49E-08 | 1.12E-04             | -2.21       |
| Kif20b        | kinesin family member 20B                                                        | 240641      | 1449612_x_at | 7.75E-04 | 1.37E-01             | -2.20       |
| Ccdc80        | coiled-coil domain containing 80                                                 | 67896       | 1424186_at   | 5.00E-03 | 4.28E-01             | -2.19       |
| Ppbp          | pro-platelet basic protein                                                       | 57349       | 1418480_at   | 3.72E-02 | 1.00E+00             | -2.16       |
| Chl1          | cell adhesion molecule with homology to L1CAM                                    | 12661       | 1435190_at   | 2.81E-04 | 7.05E-02             | -2.15       |
| Tbx18         | T-box18                                                                          | 76365       | 1449871_at   | 1.23E-08 | 5.53E-05             | -2.14       |
| Otx2          | orthodenticle homolog 2 (Drosophila)                                             | 18424       | 1425926_a_at | 2.86E-02 | 9.32E-01             | -2.12       |
| Mgll          | monoglyceride lipase                                                             | 23945       | 1453836_a_at | 4.36E-08 | 1.31E-04             | -2.11       |
| ---           | Transcribed locus                                                                | ---         | 1420287_at   | 5.75E-05 | 2.18E-02             | -2.09       |
| Fbxo32        | F-box protein 32                                                                 | 67731       | 1448747_at   | 4.67E-02 | 1.00E+00             | -2.08       |
| 9130024F11Rik | RIKEN cDNA 9130024F11 gene                                                       | 78900       | 1453245_at   | 9.38E-03 | 5.94E-01             | -2.07       |
| ---           | ---                                                                              | ---         | 1457041_at   | 8.06E-03 | 5.47E-01             | -2.05       |
| 2900046L07Rik | RIKEN cDNA 2900046L07 gene                                                       | 73027       | 1432944_at   | 9.36E-03 | 5.94E-01             | -2.05       |

|               |                                                                                  |        |              |          |          |       |
|---------------|----------------------------------------------------------------------------------|--------|--------------|----------|----------|-------|
| Cyb5d2        | cytochrome b5 domain containing 2                                                | 192986 | 1444065_at   | 2.30E-04 | 6.12E-02 | -2.05 |
| ---           | Transcribed locus, moderately similar to NP_891550.1 ADAM metalloproteinase with | ---    | 1446346_at   | 1.49E-03 | 2.05E-01 | -2.03 |
| 4632404H22Rik | RIKEN cDNA 4632404H22 gene                                                       | 78755  | 1452682_at   | 2.51E-05 | 1.27E-02 | -2.02 |
| Uck2          | uridine-cytidine kinase 2                                                        | 80914  | 1439741_x_at | 3.29E-07 | 5.94E-04 | -2.02 |
| 2810442I21Rik | RIKEN cDNA 2810442I21 gene                                                       | 72735  | 1439112_at   | 5.37E-06 | 4.03E-03 | -1.99 |
| Thrsp         | thyroid hormone responsive SPOT14 homolog (Rattus)                               | 21835  | 1422973_a_at | 1.53E-03 | 2.07E-01 | -1.99 |
| Huwe1         | HECT, UBA and WWE domain containing 1                                            | 59026  | 1448056_at   | 1.18E-04 | 3.71E-02 | -1.98 |
| Cntnap2       | contactin associated protein-like 2                                              | 66797  | 1437782_at   | 1.36E-02 | 7.06E-01 | -1.98 |
| Lmo7          | LIM domain only 7                                                                | 380928 | 1455056_at   | 5.07E-06 | 3.95E-03 | -1.97 |
| Cacna1d       | calcium channel, voltage-dependent, L type, alpha 1D subunit                     | 12289  | 1427974_s_at | 3.43E-05 | 1.56E-02 | -1.96 |
| ---           | Transcribed locus                                                                | ---    | 1457743_at   | 1.73E-04 | 5.03E-02 | -1.96 |
| Fzd6          | frizzled homolog 6 (Drosophila)                                                  | 14368  | 1417301_at   | 1.04E-02 | 6.24E-01 | -1.95 |
| ---           | ---                                                                              | ---    | 1457533_at   | 1.39E-05 | 8.25E-03 | -1.95 |
| Rnasel        | ribonuclease L (2', 5'-oligoadenylate synthetase-dependent)                      | 24014  | 1426603_at   | 2.46E-02 | 8.90E-01 | -1.95 |
| ---           | Transcribed locus                                                                | ---    | 1458298_at   | 8.31E-03 | 5.58E-01 | -1.95 |
| Ugcg          | UDP-glucose ceramide glucosyltransferase                                         | 22234  | 1439863_at   | 2.72E-04 | 6.90E-02 | -1.94 |
| 5730410E15Rik | RIKEN cDNA 5730410E15 gene                                                       | 319613 | 1438667_at   | 3.71E-06 | 3.10E-03 | -1.93 |
| Prkce         | protein kinase C, epsilon                                                        | 18754  | 1449956_at   | 8.47E-03 | 5.66E-01 | -1.93 |
| Socs6         | suppressor of cytokine signaling 6                                               | 54607  | 1452764_at   | 1.44E-02 | 7.20E-01 | -1.93 |
| ---           | ---                                                                              | ---    | 1459017_at   | 2.18E-02 | 8.57E-01 | -1.92 |
| Prrg1         | proline rich Gla (G-carboxyglutamic acid) 1                                      | 546336 | 1441441_at   | 1.87E-04 | 5.25E-02 | -1.92 |
| Dnaja4        | DnaJ (Hsp40) homolog, subfamily A, member 4                                      | 58233  | 1418592_at   | 1.81E-04 | 5.18E-02 | -1.92 |
| Prkar1b       | protein kinase, cAMP dependent regulatory, type I beta                           | 19085  | 1434325_x_at | 1.88E-07 | 3.86E-04 | -1.92 |
| Rhobtb3       | Rho-related BTB domain containing 3                                              | 73296  | 1429661_at   | 7.02E-03 | 5.12E-01 | -1.92 |
| Plcb1         | phospholipase C, beta 1                                                          | 18795  | 1425781_a_at | 4.47E-02 | 1.00E+00 | -1.91 |
| Htra1         | HtrA serine peptidase 1                                                          | 56213  | 1416749_at   | 2.06E-02 | 8.32E-01 | -1.91 |
| ---           | ---                                                                              | ---    | 1446318_at   | 1.10E-02 | 6.40E-01 | -1.91 |
| Ndrg1         | N-myc downstream regulated gene 1                                                | 17988  | 1456174_x_at | 3.13E-02 | 9.71E-01 | -1.91 |
| Smtn          | smoothelin                                                                       | 29856  | 1452469_a_at | 6.70E-05 | 2.40E-02 | -1.91 |
| Hivep3        | human immunodeficiency virus type I enhancer binding protein 3                   | 16656  | 1458802_at   | 1.20E-02 | 6.66E-01 | -1.90 |
| Psd           | pleckstrin and Sec7 domain containing                                            | 73728  | 1435780_at   | 1.15E-02 | 6.55E-01 | -1.90 |
| ---           | ---                                                                              | ---    | 1445892_at   | 9.82E-07 | 1.30E-03 | -1.90 |
| ---           | Transcribed locus                                                                | ---    | 1458555_at   | 2.34E-02 | 8.77E-01 | -1.90 |
| A830039N20Rik | RIKEN cDNA A830039N20 gene                                                       | 268723 | 1455554_at   | 8.07E-04 | 1.39E-01 | -1.89 |
| ---           | Transcribed locus                                                                | ---    | 1434025_at   | 1.93E-02 | 8.05E-01 | -1.88 |
| 6720454L07Rik | RIKEN cDNA 6720454L07 gene                                                       | 77887  | 1454557_at   | 7.20E-05 | 2.50E-02 | -1.87 |
| Lpar2         | lysophosphatidic acid receptor 2                                                 | 53978  | 1420576_at   | 3.91E-02 | 1.00E+00 | -1.87 |
| ---           | Transcribed locus                                                                | ---    | 1442867_at   | 4.83E-02 | 1.00E+00 | -1.87 |
| Snrpn         | small nuclear ribonucleoprotein N                                                | 20646  | 1455890_x_at | 2.36E-04 | 6.19E-02 | -1.87 |
| Arpp21        | cyclic AMP-regulated phosphoprotein, 21                                          | 74100  | 1442121_at   | 5.54E-04 | 1.12E-01 | -1.86 |
| Kcnq2         | potassium voltage-gated channel, subfamily Q, member 2                           | 16536  | 1451595_a_at | 6.74E-06 | 4.60E-03 | -1.86 |
| 2810030E01Rik | RIKEN cDNA 2810030E01 gene                                                       | 72668  | 1430580_at   | 2.90E-04 | 7.17E-02 | -1.86 |
| ---           | Transcribed locus                                                                | ---    | 1444384_at   | 1.68E-02 | 7.66E-01 | -1.86 |
| Dsp           | desmoplakin                                                                      | 109620 | 1435494_s_at | 1.70E-04 | 5.02E-02 | -1.86 |
| ---           | Transcribed locus                                                                | ---    | 1457104_at   | 1.00E-05 | 6.54E-03 | -1.85 |
| ---           | Transcribed locus                                                                | ---    | 1437896_at   | 3.49E-07 | 6.05E-04 | -1.85 |
| ---           | ---                                                                              | ---    | 1456570_at   | 1.17E-02 | 6.58E-01 | -1.85 |
| Sox7          | SRY-box containing gene 7                                                        | 20680  | 1416564_at   | 6.43E-04 | 1.20E-01 | -1.85 |
| Six4          | sine oculis-related homeobox 4 homolog (Drosophila)                              | 20474  | 1425767_a_at | 2.35E-03 | 2.72E-01 | -1.85 |
| ---           | Transcribed locus                                                                | ---    | 1447609_at   | 4.29E-05 | 1.78E-02 | -1.85 |
| Rai14         | Retinoic acid induced 14                                                         | 75646  | 1444777_at   | 2.51E-02 | 8.97E-01 | -1.85 |
| Gpr155        | G protein-coupled receptor 155                                                   | 68526  | 1452353_at   | 1.48E-05 | 8.56E-03 | -1.84 |
| Ppnr          | per-pentamer repeat gene                                                         | 26930  | 1420747_at   | 6.75E-04 | 1.24E-01 | -1.84 |
| 2900083I11Rik | RIKEN cDNA 2900083I11 gene                                                       | 58212  | 1421472_at   | 9.91E-03 | 6.10E-01 | -1.84 |
| Slc25a24      | solute carrier family 25 (mitochondrial carrier, phosphate carrier), member 24   | 229731 | 1427483_at   | 1.17E-05 | 7.40E-03 | -1.83 |
| Aph1b         | anterior pharynx defective 1b homolog (C. elegans)                               | 208117 | 1435793_at   | 3.23E-03 | 3.27E-01 | -1.83 |
| Pif1          | PIF1 5'-to-3' DNA helicase homolog (S. cerevisiae)                               | 208084 | 1438149_at   | 1.13E-07 | 2.68E-04 | -1.83 |
| Kctd4         | potassium channel tetramerisation domain containing 4                            | 67516  | 1420537_at   | 2.46E-02 | 8.90E-01 | -1.83 |

|               |                                                                                 |        |              |          |          |       |
|---------------|---------------------------------------------------------------------------------|--------|--------------|----------|----------|-------|
| Syngn1        | synaptogyrin 1                                                                  | 20972  | 1434661_at   | 7.99E-03 | 5.44E-01 | -1.82 |
| Vstm2a        | V-set and transmembrane domain containing 2A                                    | 211739 | 1452065_at   | 1.57E-03 | 2.09E-01 | -1.82 |
| Gpc6          | glypican 6                                                                      | 23888  | 1419688_at   | 1.95E-04 | 5.43E-02 | -1.82 |
| 1110018F16Rik | RIKEN cDNA 1110018F16 gene                                                      | 68594  | 1429468_at   | 9.33E-03 | 5.94E-01 | -1.82 |
| Sgip1         | SH3-domain GRB2-like (endophilin) interacting protein 1                         | 73094  | 1425181_at   | 2.44E-03 | 2.78E-01 | -1.82 |
| Rtn4ip1       | reticulon 4 interacting protein 1                                               | 170728 | 1417668_at   | 7.88E-03 | 5.37E-01 | -1.81 |
| Maf           | avian musculoaponeurotic fibrosarcoma (v-maf) AS42 oncogene homolog             | 17132  | 1447849_s_at | 4.48E-03 | 3.95E-01 | -1.81 |
| Abcb7         | ATP-binding cassette, sub-family B (MDR/TAP), member 7                          | 11306  | 1419931_at   | 1.16E-02 | 6.56E-01 | -1.80 |
| ---           | ---                                                                             | ---    | 1440651_at   | 8.90E-05 | 3.00E-02 | -1.80 |
| Slc6a17       | solute carrier family 6 (neurotransmitter transporter), member 17               | 229706 | 1436137_at   | 2.18E-02 | 8.59E-01 | -1.80 |
| ---           | Transcribed locus                                                               | ---    | 1443364_at   | 9.61E-03 | 6.00E-01 | -1.80 |
| Pfcp          | Phosphofructokinase, platelet                                                   | 56421  | 1437759_at   | 1.03E-02 | 6.23E-01 | -1.79 |
| Elovl7        | ELOVL family member 7, elongation of long chain fatty acids (yeast)             | 74559  | 1441891_x_at | 2.92E-02 | 9.39E-01 | -1.79 |
| RP23-100C5.8  | ProSAPiP1 protein                                                               | 241638 | 1441963_at   | 1.18E-02 | 6.63E-01 | -1.79 |
| ---           | ---                                                                             | ---    | 1443312_at   | 1.06E-03 | 1.68E-01 | -1.78 |
| ---           | Transcribed locus                                                               | ---    | 1436844_at   | 1.25E-04 | 3.88E-02 | -1.78 |
| Kcnt1         | potassium channel, subfamily T, member 1                                        | 227632 | 1439486_at   | 9.65E-03 | 6.00E-01 | -1.78 |
| Zfp69         | zinc finger protein 69                                                          | 381549 | 1458274_at   | 2.30E-05 | 1.22E-02 | -1.78 |
| Gabbr2        | gamma-aminobutyric acid (GABA-A) receptor, subunit beta 2                       | 14401  | 1428205_x_at | 5.72E-04 | 1.13E-01 | -1.78 |
| 5530601H04Rik | RIKEN cDNA 5530601H04 gene                                                      | 71445  | 1438893_at   | 1.99E-04 | 5.49E-02 | -1.78 |
| ---           | Transcribed locus                                                               | ---    | 1445638_at   | 1.88E-02 | 7.94E-01 | -1.77 |
| ---           | ---                                                                             | ---    | 1456900_at   | 2.71E-04 | 6.90E-02 | -1.77 |
| ---           | ---                                                                             | ---    | 1459608_at   | 1.63E-05 | 8.88E-03 | -1.77 |
| Hivep2        | human immunodeficiency virus type I enhancer binding protein 2                  | 15273  | 1422018_at   | 1.03E-02 | 6.22E-01 | -1.77 |
| Thada         | thyroid adenoma associated                                                      | 240174 | 1443884_at   | 8.09E-07 | 1.11E-03 | -1.77 |
| ---           | Transcribed locus                                                               | ---    | 1444136_at   | 2.36E-04 | 6.19E-02 | -1.76 |
| Arg2          | arginase type II                                                                | 11847  | 1418847_at   | 4.70E-02 | 1.00E+00 | -1.76 |
| Itga5         | integrin alpha 5 (fibronectin receptor alpha)                                   | 16402  | 1423267_s_at | 8.51E-03 | 5.67E-01 | -1.76 |
| Aldh1l2       | aldehyde dehydrogenase 1 family, member L2                                      | 216188 | 1436119_at   | 7.39E-03 | 5.20E-01 | -1.76 |
| Ap3m2         | adaptor-related protein complex 3, mu 2 subunit                                 | 64933  | 1448751_at   | 7.14E-03 | 5.15E-01 | -1.76 |
| Gatad2a       | GATA zinc finger domain containing 2A                                           | 234366 | 1445239_at   | 2.26E-02 | 8.67E-01 | -1.75 |
| Ilf3          | interleukin enhancer binding factor 3                                           | 16201  | 1422546_at   | 1.81E-06 | 1.90E-03 | -1.75 |
| ---           | Transcribed locus                                                               | ---    | 1440655_at   | 1.36E-02 | 7.06E-01 | -1.75 |
| Crkl          | v-crk sarcoma virus CT10 oncogene homolog (avian)-like                          | 12929  | 1421954_at   | 2.07E-02 | 8.32E-01 | -1.75 |
| Arnt          | aryl hydrocarbon receptor nuclear translocator                                  | 11863  | 1437042_at   | 1.21E-02 | 6.66E-01 | -1.74 |
| Csnk2a1       | casein kinase 2, alpha 1 polypeptide                                            | 12995  | 1419035_s_at | 3.55E-02 | 1.00E+00 | -1.74 |
| ---           | ---                                                                             | ---    | 1441547_at   | 3.64E-02 | 1.00E+00 | -1.74 |
| ---           | Transcribed locus                                                               | ---    | 1457883_at   | 6.92E-03 | 5.09E-01 | -1.74 |
| Cdc7          | cell division cycle 7 (S. cerevisiae)                                           | 12545  | 1426021_a_at | 1.13E-03 | 1.73E-01 | -1.74 |
| Tanc2         | tetratricopeptide repeat, ankyrin repeat and coiled-coil containing 2           | 77097  | 1443123_at   | 3.64E-02 | 1.00E+00 | -1.73 |
| Ttll4         | tubulin tyrosine ligase-like family, member 4                                   | 67534  | 1436249_at   | 4.91E-04 | 1.04E-01 | -1.73 |
| Sult4a1       | sulfotransferase family 4A, member 1                                            | 29859  | 1433714_at   | 1.54E-03 | 2.07E-01 | -1.72 |
| Pik3ip1       | phosphoinositide-3-kinase interacting protein 1                                 | 216505 | 1428332_at   | 9.58E-03 | 6.00E-01 | -1.72 |
| Zfp804a       | zinc finger protein 804A                                                        | 241514 | 1443036_at   | 7.51E-04 | 1.34E-01 | -1.72 |
| Ric3          | resistance to inhibitors of cholinesterase 3 homolog (C. elegans)               | 320360 | 1445553_at   | 5.12E-03 | 4.34E-01 | -1.72 |
| C330019G07Rik | RIKEN cDNA C330019G07 gene                                                      | 215476 | 1434218_at   | 1.09E-02 | 6.38E-01 | -1.71 |
| ---           | Transcribed locus, strongly similar to XP_222254.4 PREDICTED: similar to autism | ---    | 1434029_at   | 1.93E-03 | 2.39E-01 | -1.71 |
| Pskh1         | protein serine kinase H1                                                        | 244631 | 1433522_at   | 3.15E-05 | 1.47E-02 | -1.71 |
| Cyr61         | cysteine rich protein 61                                                        | 16007  | 1416039_x_at | 2.20E-03 | 2.60E-01 | -1.71 |
| Slc29a2       | solute carrier family 29 (nucleoside transporters), member 2                    | 13340  | 1447748_x_at | 3.49E-02 | 1.00E+00 | -1.70 |
| Itga1         | integrin alpha 1                                                                | 109700 | 1455251_at   | 3.67E-05 | 1.61E-02 | -1.70 |
| Aph1b         | anterior pharynx defective 1b homolog (C. elegans)                              | 208117 | 1456500_at   | 3.69E-05 | 1.61E-02 | -1.70 |
| ---           | ---                                                                             | ---    | 1459485_at   | 4.27E-02 | 1.00E+00 | -1.70 |
| ---           | ---                                                                             | ---    | 1446897_at   | 3.75E-02 | 1.00E+00 | -1.69 |
| 2810043O03Rik | RIKEN cDNA 2810043O03 gene                                                      | 72697  | 1430195_at   | 6.42E-04 | 1.20E-01 | -1.69 |
| D430015B01Rik | RIKEN cDNA D430015B01 gene                                                      | 58909  | 1456611_at   | 1.17E-02 | 6.58E-01 | -1.69 |
| ---           | ---                                                                             | ---    | 1439412_at   | 9.66E-03 | 6.00E-01 | -1.69 |

|               |                                                                         |        |              |          |          |       |
|---------------|-------------------------------------------------------------------------|--------|--------------|----------|----------|-------|
| ---           | Transcribed locus                                                       | ---    | 1444143_at   | 3.82E-02 | 1.00E+00 | -1.69 |
| Dclk3         | doublecortin-like kinase 3                                              | 245038 | 1436532_at   | 2.95E-05 | 1.43E-02 | -1.69 |
| St3gal2       | ST3 beta-galactoside alpha-2,3-sialyltransferase 2                      | 20444  | 1421892_at   | 4.74E-02 | 1.00E+00 | -1.69 |
| Srprb         | signal recognition particle receptor, B subunit                         | 20818  | 1421012_at   | 2.91E-04 | 7.17E-02 | -1.69 |
| Smc2          | Structural maintenance of chromosomes 2                                 | 14211  | 1458479_at   | 1.96E-02 | 8.13E-01 | -1.69 |
| Nckip5d       | NCK interacting protein with SH3 domain                                 | 80987  | 1418975_at   | 2.40E-02 | 8.82E-01 | -1.69 |
| Sh2b2         | SH2B adaptor protein 2                                                  | 23921  | 1450718_at   | 1.46E-02 | 7.23E-01 | -1.69 |
| Edg5          | endothelial differentiation, sphingolipid G-protein-coupled receptor, 5 | 14739  | 1428176_at   | 9.27E-06 | 6.15E-03 | -1.68 |
| Ngfr          | nerve growth factor receptor (TNFR superfamily, member 16)              | 18053  | 1454903_at   | 4.53E-02 | 1.00E+00 | -1.68 |
| ---           | Transcribed locus                                                       | ---    | 1438310_at   | 6.12E-03 | 4.76E-01 | -1.68 |
| ---           | Transcribed locus                                                       | ---    | 1436463_at   | 1.83E-02 | 7.91E-01 | -1.68 |
| Creb1         | cAMP responsive element binding protein 1                               | 12912  | 1423402_at   | 4.33E-03 | 3.89E-01 | -1.68 |
| Tyms          | Thymidylate synthase                                                    | 22171  | 1438690_at   | 2.02E-03 | 2.46E-01 | -1.68 |
| ---           | Transcribed locus                                                       | ---    | 1440371_at   | 3.29E-06 | 2.97E-03 | -1.68 |
| Vwa1          | von Willebrand factor A domain containing 1                             | 246228 | 1426399_at   | 1.19E-02 | 6.64E-01 | -1.68 |
| Cdv3          | carnitine deficiency-associated gene expressed in ventricle 3           | 321022 | 1440332_at   | 2.73E-03 | 2.97E-01 | -1.68 |
| ---           | Transcribed locus                                                       | ---    | 1440946_at   | 5.87E-03 | 4.63E-01 | -1.68 |
| Prkar2a       | protein kinase, cAMP dependent regulatory, type II alpha                | 19087  | 1427414_at   | 2.31E-04 | 6.12E-02 | -1.68 |
| Kcnc1         | potassium voltage gated channel, Shaw-related subfamily, member 1       | 16502  | 1456944_at   | 3.88E-06 | 3.18E-03 | -1.68 |
| ---           | ---                                                                     | ---    | 1440570_at   | 4.72E-02 | 1.00E+00 | -1.68 |
| Arhgap6       | Rho GTPase activating protein 6                                         | 11856  | 1451867_x_at | 4.80E-02 | 1.00E+00 | -1.68 |
| Klhl5         | kelch-like 5 (Drosophila)                                               | 71778  | 1444486_at   | 5.34E-06 | 4.03E-03 | -1.68 |
| Klf15         | Kruppel-like factor 15                                                  | 66277  | 1448181_at   | 3.38E-02 | 9.94E-01 | -1.67 |
| Gria4         | Glutamate receptor, ionotropic, AMPA4 (alpha 4)                         | 14802  | 1436772_at   | 9.99E-03 | 6.11E-01 | -1.67 |
| ---           | ---                                                                     | ---    | 1430605_at   | 3.09E-03 | 3.20E-01 | -1.67 |
| Cntn1         | contactin 1                                                             | 12805  | 1449563_at   | 7.53E-04 | 1.34E-01 | -1.67 |
| Rgs7bp        | regulator of G-protein signalling 7 binding protein                     | 52882  | 1436876_at   | 3.63E-04 | 8.35E-02 | -1.66 |
| Letmd1        | LETM1 domain containing 1                                               | 68614  | 1437116_at   | 1.92E-03 | 2.39E-01 | -1.66 |
| Tmem25        | transmembrane protein 25                                                | 71687  | 1436644_x_at | 2.52E-02 | 8.98E-01 | -1.66 |
| 4930525F21Rik | RIKEN cDNA 4930525F21 gene                                              | 75823  | 1438642_at   | 1.53E-02 | 7.38E-01 | -1.66 |
| Mmp15         | matrix metalloproteinase 15                                             | 17388  | 1422597_at   | 3.56E-03 | 3.46E-01 | -1.66 |
| E030016H06Rik | RIKEN cDNA E030016H06 gene                                              | 402722 | 1440443_at   | 1.02E-02 | 6.17E-01 | -1.66 |
| Cplx2         | complexin 2                                                             | 12890  | 1421477_at   | 2.17E-04 | 5.96E-02 | -1.66 |
| Cplx1         | complexin 1                                                             | 12889  | 1448832_a_at | 3.09E-05 | 1.47E-02 | -1.65 |
| Mta3          | metastasis associated 3                                                 | 116871 | 1421402_at   | 1.64E-03 | 2.14E-01 | -1.65 |
| Fcho1         | FCH domain only 1                                                       | 74015  | 1428575_at   | 7.23E-03 | 5.17E-01 | -1.65 |
| Sdf4          | stromal cell derived factor 4                                           | 20318  | 1448367_at   | 1.05E-02 | 6.24E-01 | -1.65 |
| Clstn2        | calsynenin 2                                                            | 64085  | 1422158_at   | 3.34E-02 | 9.88E-01 | -1.65 |
| Btdb7         | BTB (POZ) domain containing 7                                           | 238386 | 1442061_at   | 1.40E-06 | 1.65E-03 | -1.64 |
| Arhgef17      | Rho guanine nucleotide exchange factor (GEF) 17                         | 207212 | 1433682_at   | 1.19E-02 | 6.64E-01 | -1.64 |
| Zcchc11       | zinc finger, CCHC domain containing 11                                  | 230594 | 1439631_at   | 8.07E-04 | 1.39E-01 | -1.64 |
| Slitrk4       | SLIT and NTRK-like family, member 4                                     | 245446 | 1437744_at   | 1.61E-02 | 7.56E-01 | -1.64 |
| Sh3gl2        | SH3-domain GRB2-like 2                                                  | 20404  | 1418792_at   | 3.46E-02 | 1.00E+00 | -1.64 |
| Stk36         | serine/threonine kinase 36 (fused homolog, Drosophila)                  | 269209 | 1434733_at   | 7.49E-03 | 5.24E-01 | -1.64 |
| C77370        | expressed sequence C77370                                               | 245555 | 1440910_at   | 1.63E-05 | 8.88E-03 | -1.64 |
| Abhd6         | abhydrolase domain containing 6                                         | 66082  | 1419104_at   | 2.57E-02 | 9.06E-01 | -1.64 |
| Tcf12         | Transcription factor 12                                                 | 21406  | 1446294_at   | 1.31E-03 | 1.90E-01 | -1.64 |
| ---           | Transcribed locus                                                       | ---    | 1436260_at   | 3.91E-03 | 3.64E-01 | -1.64 |
| ---           | ---                                                                     | ---    | 1444005_at   | 1.52E-03 | 2.07E-01 | -1.64 |
| Chrna7        | cholinergic receptor, nicotinic, alpha polypeptide 7                    | 11441  | 1440681_at   | 3.61E-02 | 1.00E+00 | -1.64 |
| Ezh1          | enhancer of zeste homolog 1 (Drosophila)                                | 14055  | 1449023_a_at | 7.51E-04 | 1.34E-01 | -1.63 |
| Slc35a2       | solute carrier family 35 (UDP-galactose transporter), member A2         | 22232  | 1457024_x_at | 4.61E-07 | 6.92E-04 | -1.63 |
| Kcnp4         | Kv channel interacting protein 4                                        | 80334  | 1437631_at   | 2.98E-04 | 7.26E-02 | -1.63 |
| Pitpna        | phosphatidylinositol transfer protein, alpha                            | 18738  | 1423282_at   | 2.34E-05 | 1.22E-02 | -1.63 |
| 2610204M08Rik | RIKEN cDNA 2610204M08 gene                                              | 70435  | 1436216_s_at | 2.12E-02 | 8.43E-01 | -1.63 |
| Nr3c1         | nuclear receptor subfamily 3, group C, member 1                         | 14815  | 1457635_s_at | 1.64E-02 | 7.63E-01 | -1.63 |
| Ptprj         | protein tyrosine phosphatase, receptor type, J                          | 19271  | 1425452_s_at | 5.58E-03 | 4.53E-01 | -1.63 |
| ---           | Transcribed locus                                                       | ---    | 1445575_at   | 1.49E-02 | 7.30E-01 | -1.62 |

|               |                                                                                  |        |              |          |          |       |
|---------------|----------------------------------------------------------------------------------|--------|--------------|----------|----------|-------|
| Psma1         | proteasome (prosome, macropain) subunit, alpha type 1                            | 26440  | 1436769_at   | 1.46E-03 | 2.02E-01 | -1.62 |
| Cadm2         | cell adhesion molecule 2                                                         | 239857 | 1435146_s_at | 2.14E-02 | 8.45E-01 | -1.62 |
| Ttc9c         | tetratricopeptide repeat domain 9C                                               | 70387  | 1432245_s_at | 1.31E-02 | 6.89E-01 | -1.61 |
| Camk1d        | calcium/calmodulin-dependent protein kinase ID                                   | 227541 | 1452050_at   | 4.96E-04 | 1.04E-01 | -1.61 |
| Itgb3bp       | integrin beta 3 binding protein (beta3-endonexin)                                | 67733  | 1449953_at   | 3.60E-03 | 3.46E-01 | -1.61 |
| Ppp1r14b      | Protein phosphatase 1, regulatory (inhibitor) subunit 14B                        | 18938  | 1436716_at   | 4.01E-06 | 3.23E-03 | -1.61 |
| Alkbh2        | alkB, alkylation repair homolog 2 (E. coli)                                      | 231642 | 1455673_at   | 2.24E-02 | 8.65E-01 | -1.60 |
| Josd3         | Josephin domain containing 3                                                     | 75316  | 1442289_at   | 1.56E-02 | 7.44E-01 | -1.60 |
| ---           | Transcribed locus                                                                | ---    | 1439596_at   | 1.14E-02 | 6.51E-01 | -1.60 |
| B4galnt1      | beta-1,4-N-acetyl-galactosaminyl transferase 1                                   | 14421  | 1418655_at   | 3.82E-02 | 1.00E+00 | -1.60 |
| Scn2b         | sodium channel, voltage-gated, type II, beta                                     | 72821  | 1436134_at   | 8.20E-03 | 5.53E-01 | -1.60 |
| Guf1          | GUF1 GTPase homolog (S. cerevisiae)                                              | 231279 | 1455163_at   | 8.46E-03 | 5.66E-01 | -1.60 |
| Fgf1          | fibroblast growth factor 1                                                       | 14164  | 1423136_at   | 1.20E-03 | 1.79E-01 | -1.60 |
| Epha10        | Eph receptor A10                                                                 | 230735 | 1436093_at   | 5.53E-03 | 4.50E-01 | -1.60 |
| Grb14         | growth factor receptor bound protein 14                                          | 50915  | 1417673_at   | 4.83E-05 | 1.96E-02 | -1.60 |
| Ppp1r1b       | protein phosphatase 1, regulatory (inhibitor) subunit 1B                         | 19049  | 1451331_at   | 4.49E-03 | 3.95E-01 | -1.60 |
| Aldh16a1      | aldehyde dehydrogenase 16 family, member A1                                      | 69748  | 1447372_at   | 2.84E-02 | 9.30E-01 | -1.60 |
| Gfm1          | G elongation factor, mitochondrial 1                                             | 28030  | 1448381_at   | 9.73E-04 | 1.58E-01 | -1.59 |
| D230040A04Rik | RIKEN cDNA D230040A04 gene                                                       | 414113 | 1442151_at   | 6.87E-03 | 5.09E-01 | -1.59 |
| ---           | ---                                                                              | ---    | 1440123_at   | 7.73E-08 | 1.94E-04 | -1.59 |
| C77805        | expressed sequence C77805                                                        | 97592  | 1445490_at   | 3.12E-02 | 9.70E-01 | -1.59 |
| ---           | ---                                                                              | ---    | 1440701_at   | 4.38E-04 | 9.59E-02 | -1.59 |
| Zswim4        | zinc finger, SWIM domain containing 4                                            | 212168 | 1436710_at   | 3.99E-02 | 1.00E+00 | -1.59 |
| Usp32         | ubiquitin specific peptidase 32                                                  | 237898 | 1459857_at   | 1.24E-02 | 6.69E-01 | -1.59 |
| Kcnb1         | potassium voltage gated channel, Shab-related subfamily, member 1                | 16500  | 1423180_at   | 4.04E-03 | 3.72E-01 | -1.59 |
| Ank3          | ankyrin 3, epithelial                                                            | 11735  | 1425202_a_at | 1.54E-03 | 2.07E-01 | -1.59 |
| ---           | Transcribed locus                                                                | ---    | 1447279_at   | 3.61E-04 | 8.35E-02 | -1.59 |
| Ifnar2        | interferon (alpha and beta) receptor 2                                           | 15976  | 1440169_x_at | 2.52E-03 | 2.82E-01 | -1.59 |
| Abi1          | abl-interactor 1                                                                 | 11308  | 1438506_s_at | 4.52E-03 | 3.95E-01 | -1.59 |
| Usp14         | Ubiquitin specific peptidase 14                                                  | 59025  | 1437714_x_at | 2.10E-02 | 8.39E-01 | -1.59 |
| Pcdh8         | protocadherin 8                                                                  | 18530  | 1447825_x_at | 7.23E-03 | 5.17E-01 | -1.59 |
| ---           | Transcribed locus, strongly similar to NP_081035.1 mitochondrial ribosomal prote | ---    | 1459856_at   | 1.72E-02 | 7.73E-01 | -1.59 |
| Bcor          | Bcl6 interacting corepressor                                                     | 71458  | 1452910_at   | 6.22E-05 | 2.31E-02 | -1.59 |
| Adamts3       | a disintegrin-like and metallopeptidase (reprolysin type) with thrombospondin ty | 330119 | 1441693_at   | 9.70E-03 | 6.01E-01 | -1.58 |
| Rab32         | RAB32, member RAS oncogene family                                                | 67844  | 1416527_at   | 6.84E-03 | 5.08E-01 | -1.58 |
| Malt1         | mucosa associated lymphoid tissue lymphoma translocation gene 1                  | 240354 | 1456429_at   | 3.80E-02 | 1.00E+00 | -1.58 |
| Gpr85         | G protein-coupled receptor 85                                                    | 64450  | 1424897_at   | 1.37E-04 | 4.21E-02 | -1.58 |
| Rtn4rl2       | reticulon 4 receptor-like 2                                                      | 269295 | 1439573_at   | 3.26E-02 | 9.84E-01 | -1.58 |
| ---           | ---                                                                              | ---    | 1447136_at   | 2.61E-02 | 9.09E-01 | -1.58 |
| Slco3a1       | solute carrier organic anion transporter family, member 3a1                      | 108116 | 1418030_at   | 1.96E-02 | 8.13E-01 | -1.58 |
| Cnot6l        | CCR4-NOT transcription complex, subunit 6-like                                   | 231464 | 1451723_at   | 3.88E-04 | 8.75E-02 | -1.58 |
| Chst11        | carbohydrate sulfotransferase 11                                                 | 218194 | 1456606_a_at | 6.96E-03 | 5.09E-01 | -1.58 |
| Baiap2        | brain-specific angiogenesis inhibitor 1-associated protein 2                     | 108100 | 1435128_at   | 3.25E-03 | 3.28E-01 | -1.58 |
| Dtl           | denticleless homolog (Drosophila)                                                | 76843  | 1443864_at   | 1.20E-02 | 6.66E-01 | -1.58 |
| Pla2g4c       | phospholipase A2, group IVC (cytosolic, calcium-independent)                     | 232889 | 1436712_at   | 3.24E-03 | 3.27E-01 | -1.58 |
| Pold3         | Polymerase (DNA-directed), delta 3, accessory subunit                            | 67967  | 1459647_at   | 1.54E-02 | 7.38E-01 | -1.57 |
| Pole2         | polymerase (DNA directed), epsilon 2 (p59 subunit)                               | 18974  | 1431440_at   | 2.76E-02 | 9.21E-01 | -1.57 |
| Tie2          | transducin-like enhancer of split 2, homolog of Drosophila E(spl)                | 21886  | 1436244_a_at | 3.50E-02 | 1.00E+00 | -1.57 |
| Lpgat1        | Lysophosphatidylglycerol acyltransferase 1                                       | 226856 | 1457961_at   | 1.06E-03 | 1.68E-01 | -1.57 |
| ---           | Transcribed locus, strongly similar to XP_001480950.1 PREDICTED: similar to ribo | ---    | 1458629_at   | 7.82E-03 | 5.34E-01 | -1.57 |
| Wdr33         | WD repeat domain 33                                                              | 74320  | 1453322_at   | 3.30E-02 | 9.84E-01 | -1.57 |
| 5830474E16Rik | RIKEN cDNA 5830474E16 gene                                                       | 76094  | 1433110_at   | 1.13E-02 | 6.49E-01 | -1.57 |
| Gria4         | glutamate receptor, ionotropic, AMPA4 (alpha 4)                                  | 14802  | 1440891_at   | 2.89E-02 | 9.38E-01 | -1.57 |
| AU021128      | expressed sequence AU021128                                                      | 99209  | 1457575_at   | 3.39E-04 | 7.97E-02 | -1.57 |
| Napb          | N-ethylmaleimide sensitive fusion protein attachment protein beta                | 17957  | 1423173_at   | 1.52E-05 | 8.67E-03 | -1.56 |
| Slc9a3r2      | solute carrier family 9 (sodium/hydrogen exchanger), member 3 regulator 2        | 65962  | 1428954_at   | 3.28E-02 | 9.84E-01 | -1.56 |
| March7        | membrane-associated ring finger (C3HC4) 7                                        | 57438  | 1458690_at   | 1.25E-02 | 6.71E-01 | -1.56 |

|               |                                                                                  |        |              |          |          |       |
|---------------|----------------------------------------------------------------------------------|--------|--------------|----------|----------|-------|
| ---           | ---                                                                              | ---    | 1446107_at   | 1.95E-03 | 2.41E-01 | -1.56 |
| Clec14a       | C-type lectin domain family 14, member a                                         | 66864  | 1419468_at   | 1.50E-02 | 7.30E-01 | -1.56 |
| 3110001A13Rik | RIKEN cDNA 3110001A13 gene                                                       | 66540  | 1416893_at   | 2.29E-03 | 2.67E-01 | -1.56 |
| Cplx1         | complexin 1                                                                      | 12889  | 1417746_at   | 8.04E-03 | 5.46E-01 | -1.56 |
| ---           | ---                                                                              | ---    | 1442375_at   | 1.42E-02 | 7.13E-01 | -1.56 |
| Agbl5         | ATP/GTP binding protein-like 5                                                   | 231093 | 1439465_x_at | 1.93E-02 | 8.06E-01 | -1.56 |
| Kcnt2         | Potassium channel, subfamily T, member 2                                         | 240776 | 1459971_at   | 1.18E-02 | 6.63E-01 | -1.56 |
| Kpnb1         | karyopherin (importin) beta 1                                                    | 16211  | 1451967_x_at | 6.21E-03 | 4.80E-01 | -1.56 |
| BC062127      | cDNA sequence BC062127                                                           | 331188 | 1445274_at   | 2.44E-02 | 8.89E-01 | -1.56 |
| Tll11         | tubulin tyrosine ligase-like family, member 11                                   | 74410  | 1430064_at   | 6.19E-03 | 4.80E-01 | -1.55 |
| ---           | ---                                                                              | ---    | 1446461_at   | 2.98E-03 | 3.16E-01 | -1.55 |
| Rnf11         | ring finger protein 11                                                           | 29864  | 1426405_at   | 2.67E-02 | 9.18E-01 | -1.55 |
| Gcnt2         | glucosaminyl (N-acetyl) transferase 2, l-branching enzyme                        | 14538  | 1425503_at   | 2.11E-02 | 8.40E-01 | -1.55 |
| 4933417O08Rik | RIKEN cDNA 4933417O08 gene                                                       | 71146  | 1439546_at   | 4.37E-02 | 1.00E+00 | -1.55 |
| 2610020C07Rik | RIKEN cDNA 2610020C07 gene                                                       | 69918  | 1430618_at   | 2.23E-04 | 5.98E-02 | -1.55 |
| Vldlr         | very low density lipoprotein receptor                                            | 22359  | 1438258_at   | 1.22E-02 | 6.66E-01 | -1.55 |
| Aak1          | AP2 associated kinase 1                                                          | 269774 | 1435038_s_at | 1.10E-03 | 1.72E-01 | -1.55 |
| ---           | Transcribed locus                                                                | ---    | 1448037_at   | 1.35E-03 | 1.94E-01 | -1.55 |
| Zfp57         | zinc finger protein 57                                                           | 22715  | 1450929_at   | 2.61E-02 | 9.09E-01 | -1.55 |
| Cntnap2       | contactin associated protein-like 2                                              | 66797  | 1450758_at   | 2.45E-02 | 8.89E-01 | -1.55 |
| Rai14         | retinoic acid induced 14                                                         | 75646  | 1417401_at   | 2.80E-02 | 9.24E-01 | -1.55 |
| ---           | ---                                                                              | ---    | 1446094_at   | 2.38E-02 | 8.81E-01 | -1.55 |
| ---           | Transcribed locus                                                                | ---    | 1439621_at   | 2.00E-02 | 8.19E-01 | -1.55 |
| Ets2          | E26 avian leukemia oncogene 2, 3' domain                                         | 23872  | 1416268_at   | 1.79E-02 | 7.89E-01 | -1.55 |
| ---           | Transcribed locus, weakly similar to NP_001041402.1 hypothetical protein LOC4991 | ---    | 1440628_at   | 1.61E-03 | 2.12E-01 | -1.55 |
| 3110039C02Rik | RIKEN cDNA 3110039C02 gene                                                       | 73127  | 1430952_at   | 1.78E-02 | 7.87E-01 | -1.54 |
| ---           | Transcribed locus                                                                | ---    | 1446200_at   | 3.92E-03 | 3.64E-01 | -1.54 |
| Wdr22         | WD repeat domain 22                                                              | 320808 | 1455702_at   | 4.95E-02 | 1.00E+00 | -1.54 |
| Slc7a11       | solute carrier family 7 (cationic amino acid transporter, y+ system), member 11  | 26570  | 1443536_at   | 2.77E-02 | 9.22E-01 | -1.54 |
| Wapal         | wings apart-like homolog (Drosophila)                                            | 218914 | 1442426_at   | 3.91E-03 | 3.64E-01 | -1.54 |
| 2610012C04Rik | RIKEN cDNA 2610012C04 gene                                                       | 70299  | 1432606_at   | 1.52E-02 | 7.35E-01 | -1.54 |
| Akap13        | A kinase (PRKA) anchor protein 13                                                | 75547  | 1430185_at   | 3.47E-02 | 1.00E+00 | -1.54 |
| Mybl2         | myeloblastosis oncogene-like 2                                                   | 17865  | 1454946_at   | 1.54E-03 | 2.07E-01 | -1.54 |
| Ccdc18        | coiled-coil domain containing 18                                                 | 73254  | 1453600_at   | 1.22E-02 | 6.66E-01 | -1.54 |
| ---           | Transcribed locus, moderately similar to XP_001234258.1 PREDICTED: similar to ba | ---    | 1445679_at   | 5.93E-03 | 4.67E-01 | -1.54 |
| Rai14         | retinoic acid induced 14                                                         | 75646  | 1441030_at   | 1.84E-02 | 7.92E-01 | -1.54 |
| Slc40a1       | solute carrier family 40 (iron-regulated transporter), member 1                  | 53945  | 1417061_at   | 1.42E-02 | 7.13E-01 | -1.53 |
| C730026J16    | hypothetical protein C730026J16                                                  | 331006 | 1434687_at   | 1.05E-02 | 6.24E-01 | -1.53 |
| Ccnjl         | cyclin J-like                                                                    | 380694 | 1456168_at   | 1.54E-02 | 7.38E-01 | -1.53 |
| BC010304      | cDNA sequence BC010304                                                           | 218236 | 1439120_at   | 1.57E-03 | 2.09E-01 | -1.53 |
| Tyw1          | tRNA-yW synthesizing protein 1 homolog (S. cerevisiae)                           | 100929 | 1426781_at   | 2.71E-02 | 9.18E-01 | -1.53 |
| BC032203      | cDNA sequence BC032203                                                           | 210982 | 1435545_at   | 1.44E-02 | 7.18E-01 | -1.53 |
| ---           | Transcribed locus, moderately similar to XP_001479965.1 PREDICTED: hypothetical  | ---    | 1442605_at   | 1.18E-02 | 6.63E-01 | -1.53 |
| Foxd1         | forkhead box D1                                                                  | 15229  | 1418876_at   | 3.09E-02 | 9.65E-01 | -1.53 |
| Prkca         | protein kinase C, alpha                                                          | 18750  | 1450945_at   | 3.23E-02 | 9.79E-01 | -1.53 |
| ---           | Transcribed locus                                                                | ---    | 1441334_at   | 5.60E-03 | 4.54E-01 | -1.53 |
| Hspbap1       | Hspb associated protein 1                                                        | 66667  | 1441900_x_at | 6.53E-03 | 4.94E-01 | -1.53 |
| 38231         | septin 4                                                                         | 18952  | 1455422_x_at | 1.08E-02 | 6.34E-01 | -1.53 |
| Hnrph1        | Heterogeneous nuclear ribonucleoprotein H1                                       | 59013  | 1437267_x_at | 1.54E-03 | 2.07E-01 | -1.53 |
| 8430436O14Rik | RIKEN cDNA 8430436O14 gene                                                       | 71506  | 1452761_a_at | 2.07E-02 | 8.32E-01 | -1.53 |
| Sox21         | SRY-box containing gene 21                                                       | 223227 | 1451835_at   | 3.01E-05 | 1.44E-02 | -1.53 |
| C78704        | expressed sequence C78704                                                        | 97868  | 1458862_at   | 4.96E-02 | 1.00E+00 | -1.53 |
| AW413774      | expressed sequence AW413774                                                      | 106046 | 1435576_at   | 6.10E-04 | 1.17E-01 | -1.53 |
| ---           | ---                                                                              | ---    | 1458382_a_at | 3.32E-02 | 9.84E-01 | -1.52 |
| Wnt5b         | wingless-related MMTV integration site 5B                                        | 22419  | 1439373_x_at | 1.71E-03 | 2.18E-01 | -1.52 |
| Hivep3        | human immunodeficiency virus type I enhancer binding protein 3                   | 16656  | 1439660_at   | 6.41E-03 | 4.87E-01 | -1.52 |
| Slc12a9       | solute carrier family 12 (potassium/chloride transporters), member 9             | 83704  | 1442599_at   | 2.62E-02 | 9.09E-01 | -1.52 |
| 0610037D15Rik | RIKEN cDNA 0610037D15 gene                                                       | 68394  | 1453639_s_at | 1.27E-02 | 6.76E-01 | -1.52 |

|               |                                                                                |        |              |          |          |       |
|---------------|--------------------------------------------------------------------------------|--------|--------------|----------|----------|-------|
| Timm22        | translocase of inner mitochondrial membrane 22 homolog (yeast)                 | 56322  | 1448518_at   | 4.09E-02 | 1.00E+00 | -1.52 |
| Efs           | Embryonal Fyn-associated substrate                                             | 13644  | 1438114_x_at | 3.77E-02 | 1.00E+00 | -1.52 |
| Rimbp2        | RIMS binding protein 2                                                         | 231760 | 1441625_at   | 1.28E-02 | 6.80E-01 | -1.52 |
| Mipol1        | mirror-image polydactyly gene 1 homolog (human)                                | 73490  | 1435671_at   | 5.54E-04 | 1.12E-01 | -1.52 |
| 6430514L14Rik | RIKEN cDNA 6430514L14 gene                                                     | 76886  | 1425213_at   | 3.83E-02 | 1.00E+00 | -1.52 |
| Coro1c        | Coronin, actin binding protein 1C                                              | 23790  | 1419911_at   | 1.32E-02 | 6.90E-01 | -1.51 |
| ---           | Transcribed locus                                                              | ---    | 1442996_x_at | 3.38E-03 | 3.34E-01 | -1.51 |
| Arhgef3       | Rho guanine nucleotide exchange factor (GEF) 3                                 | 71704  | 1424250_a_at | 4.11E-02 | 1.00E+00 | -1.51 |
| Kap           | kidney androgen regulated protein                                              | 16483  | 1415968_a_at | 1.40E-02 | 7.10E-01 | -1.51 |
| ---           | ---                                                                            | ---    | 1454454_at   | 4.68E-02 | 1.00E+00 | -1.51 |
| Neurl         | neuralized-like homolog (Drosophila)                                           | 18011  | 1460343_at   | 3.31E-02 | 9.84E-01 | -1.51 |
| 4930506M07Rik | RIKEN cDNA 4930506M07 gene                                                     | 71653  | 1429055_at   | 4.41E-02 | 1.00E+00 | -1.51 |
| Pif1          | PIF1 5'-to-3' DNA helicase homolog (S. cerevisiae)                             | 208084 | 1436738_at   | 4.28E-03 | 3.85E-01 | -1.51 |
| 2010317E24Rik | RIKEN cDNA 2010317E24 gene                                                     | 72080  | 1438615_x_at | 2.73E-02 | 9.18E-01 | -1.51 |
| Tmem209       | Transmembrane protein 209                                                      | 72649  | 1445660_at   | 1.75E-02 | 7.78E-01 | -1.51 |
| Dleu2         | deleted in lymphocytic leukemia, 2                                             | 328425 | 1427411_s_at | 1.06E-02 | 6.30E-01 | -1.51 |
| Raly1         | RALY RNA binding protein-like                                                  | 76897  | 1454715_at   | 1.82E-02 | 7.91E-01 | -1.51 |
| Sfmbt1        | Scm-like with four mbt domains 1                                               | 54650  | 1455412_at   | 1.34E-05 | 8.08E-03 | -1.51 |
| Myrip         | myosin VIIA and Rab interacting protein                                        | 245049 | 1460601_at   | 1.12E-02 | 6.47E-01 | -1.50 |
| Arpp21        | cyclic AMP-regulated phosphoprotein, 21                                        | 74100  | 1424248_at   | 1.78E-03 | 2.25E-01 | -1.50 |
| ---           | ---                                                                            | ---    | 1446732_at   | 1.72E-02 | 7.73E-01 | -1.50 |
| Unkl          | unkempt-like (Drosophila)                                                      | 74154  | 1428565_at   | 5.47E-05 | 2.13E-02 | -1.50 |
| D3ErtD751e    | DNA segment, Chr 3, ERATO Doi 751, expressed                                   | 73852  | 1454225_s_at | 2.10E-02 | 8.39E-01 | -1.50 |
| Tinf2         | Terf1 (TRF1)-interacting nuclear factor 2                                      | 28113  | 1437166_at   | 9.35E-04 | 1.53E-01 | -1.50 |
| Gabbr3        | gamma-aminobutyric acid (GABA-A) receptor, subunit beta 3                      | 14402  | 1435021_at   | 3.52E-06 | 3.05E-03 | -1.50 |
| ---           | ---                                                                            | ---    | 1447257_at   | 3.28E-02 | 9.84E-01 | -1.50 |
| Nono          | non-POU-domain-containing, octamer binding protein                             | 53610  | 1447160_at   | 4.53E-02 | 1.00E+00 | -1.50 |
| Lyst          | lysosomal trafficking regulator                                                | 17101  | 1421384_at   | 4.83E-02 | 1.00E+00 | 1.50  |
| Inha          | inhibin alpha                                                                  | 16322  | 1422728_at   | 1.67E-02 | 7.66E-01 | 1.50  |
| 2310061C15Rik | RIKEN cDNA 2310061C15 gene                                                     | 66531  | 1427922_at   | 5.24E-04 | 1.07E-01 | 1.50  |
| Tep1          | telomerase associated protein 1                                                | 21745  | 1418196_at   | 1.26E-03 | 1.85E-01 | 1.50  |
| ---           | ---                                                                            | ---    | 1446570_at   | 2.11E-02 | 8.40E-01 | 1.50  |
| Mknk1         | MAP kinase-interacting serine/threonine kinase 1                               | 17346  | 1417631_at   | 7.03E-03 | 5.12E-01 | 1.51  |
| Gm2a          | GM2 ganglioside activator protein                                              | 14667  | 1416188_at   | 3.69E-02 | 1.00E+00 | 1.51  |
| Nfya          | nuclear transcription factor-Y alpha                                           | 18044  | 1422082_a_at | 3.08E-02 | 9.63E-01 | 1.51  |
| Eif4ebp1      | eukaryotic translation initiation factor 4E binding protein 1                  | 13685  | 1417562_at   | 1.15E-02 | 6.55E-01 | 1.51  |
| ---           | ---                                                                            | ---    | 1460144_at   | 3.85E-02 | 1.00E+00 | 1.51  |
| Adam17        | a disintegrin and metallopeptidase domain 17                                   | 11491  | 1421857_at   | 1.19E-02 | 6.64E-01 | 1.51  |
| ---           | ---                                                                            | ---    | 1440650_at   | 4.72E-02 | 1.00E+00 | 1.52  |
| Dusp26        | dual specificity phosphatase 26 (putative)                                     | 66959  | 1425848_a_at | 3.64E-03 | 3.48E-01 | 1.52  |
| ---           | ---                                                                            | ---    | 1441177_at   | 2.71E-02 | 9.18E-01 | 1.52  |
| Nid2          | nidogen 2                                                                      | 18074  | 1423516_a_at | 4.07E-03 | 3.73E-01 | 1.52  |
| Prdm5         | PR domain containing 5                                                         | 70779  | 1442740_at   | 1.88E-02 | 7.94E-01 | 1.52  |
| Kif2c         | kinesin family member 2C                                                       | 73804  | 1454221_a_at | 2.61E-03 | 2.87E-01 | 1.52  |
| Rad18         | RAD18 homolog (S. cerevisiae)                                                  | 58186  | 1423318_at   | 2.36E-02 | 8.78E-01 | 1.52  |
| Ccdc24        | coiled-coil domain containing 24                                               | 381546 | 1456905_at   | 3.71E-04 | 8.50E-02 | 1.53  |
| Tmpo          | thymopoietin                                                                   | 21917  | 1421237_at   | 4.02E-05 | 1.68E-02 | 1.53  |
| Samd8         | sterile alpha motif domain containing 8                                        | 67630  | 1434402_at   | 2.53E-06 | 2.48E-03 | 1.53  |
| Pml           | promyelocytic leukemia                                                         | 18854  | 1448757_at   | 4.13E-02 | 1.00E+00 | 1.53  |
| 2810004I08Rik | RIKEN cDNA 2810004I08 gene                                                     | 69932  | 1453534_at   | 3.16E-05 | 1.47E-02 | 1.53  |
| Sorcs2        | sortilin-related VPS10 domain containing receptor 2                            | 81840  | 1419358_at   | 2.41E-02 | 8.85E-01 | 1.54  |
| Serf1         | small EDRK-rich factor 1                                                       | 20365  | 1449509_at   | 5.19E-04 | 1.07E-01 | 1.54  |
| 2310068G24Rik | RIKEN cDNA 2310068G24 gene                                                     | 70185  | 1433023_at   | 5.82E-03 | 4.62E-01 | 1.54  |
| Hspg2         | perlecan (heparan sulfate proteoglycan 2)                                      | 15530  | 1418670_s_at | 2.24E-02 | 8.65E-01 | 1.54  |
| Mmp11         | matrix metallopeptidase 11                                                     | 17385  | 1417234_at   | 1.22E-02 | 6.66E-01 | 1.54  |
| ---           | Transcribed locus                                                              | ---    | 1445612_at   | 3.78E-02 | 1.00E+00 | 1.54  |
| Efemp1        | epidermal growth factor-containing fibulin-like extracellular matrix protein 1 | 216616 | 1427183_at   | 3.51E-03 | 3.44E-01 | 1.54  |
| Tpbp          | trophoblast glycoprotein                                                       | 21983  | 1423312_at   | 2.97E-02 | 9.48E-01 | 1.54  |



|               |                                                                    |        |              |          |          |      |
|---------------|--------------------------------------------------------------------|--------|--------------|----------|----------|------|
| Gstm1         | glutathione S-transferase, mu 1                                    | 14862  | 1425627_x_at | 6.85E-03 | 5.08E-01 | 1.54 |
| Igf1r         | insulin-like growth factor I receptor                              | 16001  | 1452108_at   | 5.80E-03 | 4.61E-01 | 1.54 |
| Ctsh          | cathepsin H                                                        | 13036  | 1418365_at   | 6.63E-03 | 4.98E-01 | 1.54 |
| Tgm2          | transglutaminase 2, C polypeptide                                  | 21817  | 1417500_a_at | 8.95E-03 | 5.84E-01 | 1.55 |
| Mamdc4        | MAM domain containing 4                                            | 381352 | 1440333_at   | 1.20E-06 | 1.51E-03 | 1.55 |
| Rims1         | regulating synaptic membrane exocytosis 1                          | 116837 | 1438305_at   | 1.86E-02 | 7.94E-01 | 1.55 |
| Adora1        | adenosine A1 receptor                                              | 11539  | 1435495_at   | 1.38E-02 | 7.07E-01 | 1.55 |
| Tnfrsf19      | tumor necrosis factor receptor superfamily, member 19              | 29820  | 1425212_a_at | 1.04E-02 | 6.24E-01 | 1.55 |
| C79407        | expressed sequence C79407                                          | 217653 | 1443668_x_at | 6.87E-05 | 2.43E-02 | 1.55 |
| ---           | Transcribed locus                                                  | ---    | 1444761_at   | 1.14E-03 | 1.73E-01 | 1.55 |
| Rybp          | RING1 and YY1 binding protein                                      | 56353  | 1421111_at   | 4.29E-02 | 1.00E+00 | 1.55 |
| Anxa6         | annexin A6                                                         | 11749  | 1415818_at   | 1.92E-02 | 8.03E-01 | 1.55 |
| ---           | Transcribed locus                                                  | ---    | 1440675_at   | 3.84E-02 | 1.00E+00 | 1.55 |
| Klf9          | Kruppel-like factor 9                                              | 16601  | 1422264_s_at | 3.39E-02 | 9.94E-01 | 1.55 |
| ---           | Transcribed locus                                                  | ---    | 1446121_at   | 9.10E-05 | 3.03E-02 | 1.56 |
| Lym1          | LYR motif containing 1                                             | 73919  | 1431774_a_at | 2.72E-02 | 9.18E-01 | 1.56 |
| Rps17         | Ribosomal protein S17                                              | 20068  | 1438501_at   | 7.29E-05 | 2.51E-02 | 1.56 |
| C330023M02Rik | RIKEN cDNA C330023M02 gene                                         | 231713 | 1433766_at   | 3.26E-02 | 9.84E-01 | 1.56 |
| Atad2b        | ATPase family, AAA domain containing 2B                            | 320817 | 1446719_at   | 7.45E-04 | 1.34E-01 | 1.56 |
| Lepre1        | leprecan 1                                                         | 56401  | 1452752_at   | 6.94E-09 | 3.91E-05 | 1.56 |
| Tnfsf12       | tumor necrosis factor (ligand) superfamily, member 12              | 619441 | 1452440_at   | 1.44E-06 | 1.65E-03 | 1.56 |
| Abhd6         | abhydrolase domain containing 6                                    | 66082  | 1419103_a_at | 3.18E-04 | 7.63E-02 | 1.56 |
| Zfp64         | zinc finger protein 64                                             | 22722  | 1430117_a_at | 3.90E-02 | 1.00E+00 | 1.56 |
| Reep4         | receptor accessory protein 4                                       | 72549  | 1428478_at   | 1.07E-03 | 1.69E-01 | 1.56 |
| Nup160        | nucleoporin 160                                                    | 59015  | 1444892_at   | 3.57E-03 | 3.46E-01 | 1.57 |
| Slc35b2       | solute carrier family 35, member B2                                | 73836  | 1423927_at   | 4.83E-02 | 1.00E+00 | 1.57 |
| D3Wsu106e     | DNA segment, Chr 3, Wayne State University 106, expressed          | 28011  | 1457626_at   | 2.17E-02 | 8.56E-01 | 1.57 |
| Rdh18         | retinol dehydrogenase 18                                           | 380674 | 1445728_at   | 1.88E-02 | 7.94E-01 | 1.57 |
| Exosc5        | exosome component 5                                                | 27998  | 1417167_at   | 2.22E-04 | 5.98E-02 | 1.57 |
| Serpinf1      | serine (or cysteine) peptidase inhibitor, clade F, member 1        | 20317  | 1416168_at   | 8.84E-03 | 5.80E-01 | 1.58 |
| Endod1        | endonuclease domain containing 1                                   | 71946  | 1426540_at   | 4.49E-02 | 1.00E+00 | 1.58 |
| ---           | Transcribed locus                                                  | ---    | 1443307_at   | 2.89E-03 | 3.11E-01 | 1.58 |
| ---           | Transcribed locus                                                  | ---    | 1441628_at   | 3.08E-03 | 3.19E-01 | 1.58 |
| Bdh2          | 3-hydroxybutyrate dehydrogenase, type 2                            | 69772  | 1453011_at   | 1.24E-02 | 6.69E-01 | 1.58 |
| Fa2h          | fatty acid 2-hydroxylase                                           | 338521 | 1426960_a_at | 3.10E-04 | 7.47E-02 | 1.58 |
| Samd8         | sterile alpha motif domain containing 8                            | 67630  | 1458408_at   | 2.29E-02 | 8.67E-01 | 1.59 |
| Psrc1         | proline/serine-rich coiled-coil 1                                  | 56742  | 1425416_s_at | 3.31E-02 | 9.84E-01 | 1.59 |
| ---           | ---                                                                | ---    | 1440958_at   | 8.40E-04 | 1.41E-01 | 1.59 |
| ---           | ---                                                                | ---    | 1459563_x_at | 2.49E-04 | 6.49E-02 | 1.59 |
| Clcn6         | chloride channel 6                                                 | 26372  | 1422314_at   | 3.77E-02 | 1.00E+00 | 1.59 |
| Stk3          | serine/threonine kinase 3 (Ste20, yeast homolog)                   | 56274  | 1418513_at   | 1.37E-02 | 7.06E-01 | 1.59 |
| Camk1         | calcium/calmodulin-dependent protein kinase I                      | 52163  | 1417605_s_at | 3.21E-02 | 9.78E-01 | 1.59 |
| ---           | ---                                                                | ---    | 1447119_at   | 3.78E-03 | 3.58E-01 | 1.59 |
| Ttc9          | tetratricopeptide repeat domain 9                                  | 69480  | 1455649_at   | 1.88E-02 | 7.94E-01 | 1.59 |
| Pitpmn2       | phosphatidylinositol transfer protein, membrane-associated 2       | 19679  | 1419757_at   | 4.64E-03 | 4.03E-01 | 1.59 |
| Ripk1         | receptor (TNFRSF)-interacting serine-threonine kinase 1            | 19766  | 1439273_at   | 3.56E-03 | 3.46E-01 | 1.59 |
| 6330500D04Rik | RIKEN cDNA 6330500D04 gene                                         | 193385 | 1458202_at   | 2.70E-02 | 9.18E-01 | 1.59 |
| Ccdc49        | coiled-coil domain containing 49                                   | 67480  | 1428759_s_at | 1.08E-02 | 6.34E-01 | 1.59 |
| Ptprd         | protein tyrosine phosphatase, receptor type, D                     | 19266  | 1444492_at   | 3.12E-02 | 9.70E-01 | 1.60 |
| Apccd1        | Adenomatosis polyposis coli down-regulated 1                       | 494504 | 1443639_at   | 1.64E-02 | 7.63E-01 | 1.60 |
| Snhg7         | Small nucleolar RNA host gene (non-protein coding) 7               | 72091  | 1447484_x_at | 7.17E-03 | 5.15E-01 | 1.60 |
| Zkscan1       | zinc finger with KRAB and SCAN domains 1                           | 74570  | 1447944_at   | 1.52E-06 | 1.67E-03 | 1.60 |
| Creb3l4       | cAMP responsive element binding protein 3-like 4                   | 78284  | 1424218_a_at | 3.11E-02 | 9.69E-01 | 1.60 |
| 9030624J02Rik | RIKEN cDNA 9030624J02 gene                                         | 71517  | 1432304_a_at | 1.77E-02 | 7.86E-01 | 1.60 |
| Fhl2          | four and a half LIM domains 2                                      | 14200  | 1419184_a_at | 2.99E-02 | 9.52E-01 | 1.60 |
| Cpne8         | copine VIII                                                        | 66871  | 1430520_at   | 1.63E-03 | 2.13E-01 | 1.61 |
| Odz2          | odd Oz/ten-m homolog 2 (Drosophila)                                | 23964  | 1420718_at   | 1.31E-02 | 6.89E-01 | 1.61 |
| Gatm          | glycine amidinotransferase (L-arginine:glycine amidinotransferase) | 67092  | 1423569_at   | 3.73E-02 | 1.00E+00 | 1.61 |

|               |                                                                                  |         |              |          |          |      |
|---------------|----------------------------------------------------------------------------------|---------|--------------|----------|----------|------|
| Qars          | glutaminyl-tRNA synthetase                                                       | 97541   | 1456213_x_at | 2.05E-02 | 8.31E-01 | 1.61 |
| Ifi35         | interferon-induced protein 35                                                    | 70110   | 1459151_x_at | 3.20E-03 | 3.26E-01 | 1.62 |
| Nkain1        | Na <sup>+</sup> /K <sup>+</sup> transporting ATPase interacting 1                | 67149   | 1419651_at   | 1.12E-03 | 1.73E-01 | 1.62 |
| Nfkbil2       | nuclear factor of kappa light polypeptide gene enhancer in B-cells inhibitor-lik | 72749   | 1428661_at   | 1.60E-05 | 8.88E-03 | 1.62 |
| EG328825      | ribosomal protein L11                                                            | 1000405 | 1448773_at   | 3.52E-02 | 1.00E+00 | 1.62 |
| Slc2a4        | solute carrier family 2 (facilitated glucose transporter), member 4              | 20528   | 1415958_at   | 3.88E-02 | 1.00E+00 | 1.62 |
| Gimap4        | GTPase, IMAP family member 4                                                     | 107526  | 1424375_s_at | 4.77E-02 | 1.00E+00 | 1.62 |
| 1700027J05Rik | RIKEN cDNA 1700027J05 gene                                                       | 69440   | 1436140_at   | 4.17E-02 | 1.00E+00 | 1.63 |
| ---           | ---                                                                              | ---     | 1443191_at   | 7.89E-03 | 5.37E-01 | 1.63 |
| Papss2        | 3'-phosphoadenosine 5'-phosphosulfate synthase 2                                 | 23972   | 1434510_at   | 2.83E-03 | 3.06E-01 | 1.63 |
| Foxj1         | forkhead box J1                                                                  | 15223   | 1425291_at   | 2.56E-02 | 9.04E-01 | 1.63 |
| Cblb          | Casitas B-lineage lymphoma b                                                     | 208650  | 1437304_at   | 8.52E-03 | 5.67E-01 | 1.64 |
| ---           | Transcribed locus                                                                | ---     | 1435409_at   | 4.24E-02 | 1.00E+00 | 1.64 |
| Zbed3         | zinc finger, BED domain containing 3                                             | 72114   | 1452088_at   | 3.16E-02 | 9.71E-01 | 1.64 |
| Nhedc2        | Na <sup>+</sup> /H <sup>+</sup> exchanger domain containing 2                    | 97086   | 1439995_at   | 2.49E-02 | 8.95E-01 | 1.65 |
| 5830405M20Rik | RIKEN cDNA 5830405M20 gene                                                       | 74749   | 1431221_at   | 1.04E-04 | 3.39E-02 | 1.65 |
| Troap         | trophinin associated protein                                                     | 78733   | 1453370_at   | 5.34E-05 | 2.11E-02 | 1.65 |
| 0610037L13Rik | RIKEN cDNA 0610037L13 gene                                                       | 74098   | 1429879_at   | 3.02E-03 | 3.16E-01 | 1.65 |
| Slc39a6       | solute carrier family 39 (metal ion transporter), member 6                       | 106957  | 1424675_at   | 2.01E-02 | 8.24E-01 | 1.65 |
| ---           | Transcribed locus                                                                | ---     | 1458640_at   | 4.60E-04 | 1.00E-01 | 1.65 |
| Olfml1        | olfactomedin-like 1                                                              | 244198  | 1455663_at   | 2.24E-02 | 8.65E-01 | 1.65 |
| LOC674761     | myosin, heavy polypeptide 7, cardiac muscle, beta                                | 140781  | 1448553_at   | 3.19E-02 | 9.75E-01 | 1.66 |
| Myh7          | myosin, heavy polypeptide 7, cardiac muscle, beta                                | 674761  |              |          |          |      |
| Cep250        | centrosomal protein 250                                                          | 16328   | 1421512_at   | 1.92E-02 | 8.03E-01 | 1.66 |
| Atp13a4       | ATPase type 13A4                                                                 | 224079  | 1438707_at   | 2.10E-02 | 8.38E-01 | 1.67 |
| Jmjd4         | jumonji domain containing 4                                                      | 194952  | 1435915_at   | 1.38E-02 | 7.07E-01 | 1.67 |
| 1700012H17Rik | RIKEN cDNA 1700012H17 gene                                                       | 242297  | 1440359_at   | 1.44E-02 | 7.19E-01 | 1.67 |
| Heatr6        | HEAT repeat containing 6                                                         | 217026  | 1424687_at   | 3.24E-04 | 7.74E-02 | 1.67 |
| Nalcn         | sodium leak channel, non-selective                                               | 675405  | 1448083_at   | 3.78E-05 | 1.64E-02 | 1.67 |
| Zdhhc14       | zinc finger, DHHC domain containing 14                                           | 224454  | 1438151_x_at | 1.45E-03 | 2.02E-01 | 1.67 |
| Thap2         | THAP domain containing, apoptosis associated protein 2                           | 66816   | 1421177_at   | 1.24E-03 | 1.84E-01 | 1.68 |
| Frzb          | frizzled-related protein                                                         | 20378   | 1448424_at   | 2.73E-02 | 9.18E-01 | 1.68 |
| Csdc2         | cold shock domain containing C2, RNA binding                                     | 105859  | 1437841_x_at | 1.39E-03 | 1.97E-01 | 1.68 |
| Cyp20a1       | cytochrome P450, family 20, subfamily A, polypeptide 1                           | 77951   | 1430452_at   | 3.93E-03 | 3.64E-01 | 1.68 |
| Unc13c        | unc-13 homolog C (C. elegans)                                                    | 208898  | 1455304_at   | 4.90E-04 | 1.04E-01 | 1.68 |
| Rad18         | RAD18 homolog (S. cerevisiae)                                                    | 58186   | 1451928_a_at | 6.62E-05 | 2.40E-02 | 1.68 |
| Etnk1         | ethanolamine kinase 1                                                            | 75320   | 1433515_s_at | 1.17E-02 | 6.58E-01 | 1.68 |
| Agpat3        | 1-acylglycerol-3-phosphate O-acyltransferase 3                                   | 28169   | 1433818_at   | 5.35E-03 | 4.43E-01 | 1.68 |
| Apba1         | amyloid beta (A4) precursor protein binding, family A, member 1                  | 319924  | 1455369_at   | 8.56E-03 | 5.68E-01 | 1.68 |
| Scn2a1        | sodium channel, voltage-gated, type II, alpha 1                                  | 110876  | 1445259_at   | 2.26E-03 | 2.65E-01 | 1.69 |
| Zfp64         | zinc finger protein 64                                                           | 22722   | 1438140_a_at | 3.73E-03 | 3.55E-01 | 1.69 |
| Atp1a2        | ATPase, Na <sup>+</sup> /K <sup>+</sup> transporting, alpha 2 polypeptide        | 98660   | 1452308_a_at | 5.08E-04 | 1.06E-01 | 1.69 |
| Atf6          | activating transcription factor 6                                                | 226641  | 1456021_at   | 1.71E-03 | 2.18E-01 | 1.69 |
| Plp1          | proteolipid protein (myelin) 1                                                   | 18823   | 1425467_a_at | 3.76E-02 | 1.00E+00 | 1.69 |
| Ephb4         | Eph receptor B4                                                                  | 13846   | 1449845_a_at | 2.54E-02 | 9.01E-01 | 1.69 |
| Sae1          | SUMO1 activating enzyme subunit 1                                                | 56459   | 1430022_at   | 6.35E-07 | 8.95E-04 | 1.70 |
| Hic1          | hypermethylated in cancer 1                                                      | 15248   | 1449226_at   | 2.82E-02 | 9.26E-01 | 1.70 |
| Cpne8         | copine VIII                                                                      | 66871   | 1430521_s_at | 3.54E-04 | 8.28E-02 | 1.70 |
| ---           | ---                                                                              | ---     | 1440425_at   | 1.68E-02 | 7.66E-01 | 1.70 |
| Spata6        | spermatogenesis associated 6                                                     | 67946   | 1418650_at   | 1.39E-04 | 4.23E-02 | 1.70 |
| ---           | Transcribed locus                                                                | ---     | 1443626_at   | 1.06E-03 | 1.68E-01 | 1.70 |
| Col6a2        | collagen, type VI, alpha 2                                                       | 12834   | 1426947_x_at | 4.40E-03 | 3.91E-01 | 1.70 |
| Dlg7          | discs, large homolog 7 (Drosophila)                                              | 218977  | 1438811_at   | 7.67E-04 | 1.36E-01 | 1.70 |
| Clec1b        | C-type lectin domain family 1, member b                                          | 56760   | 1421182_at   | 2.29E-02 | 8.67E-01 | 1.71 |
| 4833424O15Rik | RIKEN cDNA 4833424O15 gene                                                       | 75769   | 1429249_at   | 6.94E-03 | 5.09E-01 | 1.71 |
| Klhl25        | kelch-like 25 (Drosophila)                                                       | 207952  | 1425192_at   | 9.19E-03 | 5.91E-01 | 1.71 |
| Rad51l1       | RAD51-like 1 (S. cerevisiae)                                                     | 19363   | 1421430_at   | 1.48E-03 | 2.04E-01 | 1.71 |
| EG544888      | predicted gene, EG544888                                                         | 544888  | 1436685_at   | 5.11E-04 | 1.06E-01 | 1.72 |
| ---           | Transcribed locus                                                                | ---     | 1456952_at   | 6.77E-04 | 1.24E-01 | 1.72 |

|               |                                                                           |        |              |          |          |      |
|---------------|---------------------------------------------------------------------------|--------|--------------|----------|----------|------|
| Abcc4         | ATP-binding cassette, sub-family C (CFTR/MRP), member 4                   | 239273 | 1443870_at   | 5.46E-03 | 4.47E-01 | 1.72 |
| 6330416G13Rik | RIKEN cDNA 6330416G13 gene                                                | 230279 | 1426315_a_at | 7.48E-03 | 5.24E-01 | 1.72 |
| Osbpl3        | oxysterol binding protein-like 3                                          | 71720  | 1438724_at   | 9.33E-03 | 5.94E-01 | 1.72 |
| Rnf20         | ring finger protein 20                                                    | 109331 | 1452361_at   | 1.95E-08 | 8.00E-05 | 1.72 |
| ---           | Transcribed locus                                                         | ---    | 1440374_at   | 1.49E-02 | 7.30E-01 | 1.72 |
| S100a1        | S100 calcium binding protein A1                                           | 20193  | 1419814_s_at | 6.21E-04 | 1.18E-01 | 1.72 |
| A230106D06Rik | RIKEN cDNA A230106D06 gene                                                | 232785 | 1434857_at   | 5.45E-03 | 4.47E-01 | 1.73 |
| Ankrd13d      | ankyrin repeat domain 13 family, member D                                 | 68423  | 1452965_at   | 3.25E-02 | 9.83E-01 | 1.73 |
| Nfasc         | neurofascin                                                               | 269116 | 1456068_at   | 1.24E-02 | 6.69E-01 | 1.73 |
| Man1c1        | mannosidase, alpha, class 1C, member 1                                    | 230815 | 1436193_at   | 1.42E-04 | 4.28E-02 | 1.73 |
| ---           | Transcribed locus                                                         | ---    | 1458669_at   | 2.92E-02 | 9.39E-01 | 1.73 |
| 9130005N14Rik | RIKEN cDNA 9130005N14 gene                                                | 68303  | 1448648_at   | 1.13E-03 | 1.73E-01 | 1.74 |
| D4Wsu114e     | DNA segment, Chr 4, Wayne State University 114, expressed                 | 28010  | 1417120_at   | 6.24E-03 | 4.81E-01 | 1.74 |
| ---           | Transcribed locus                                                         | ---    | 1459747_at   | 4.50E-02 | 1.00E+00 | 1.74 |
| ---           | CDNA clone IMAGE:5029795                                                  | ---    | 1427600_at   | 1.66E-03 | 2.16E-01 | 1.74 |
| Trp53rk       | transformation related protein 53 regulating kinase                       | 381406 | 1419682_a_at | 2.92E-02 | 9.39E-01 | 1.74 |
| BB187676      | expressed sequence BB187676                                               | 103517 | 1455716_at   | 5.17E-03 | 4.37E-01 | 1.74 |
| Gfpt2         | glutamine fructose-6-phosphate transaminase 2                             | 14584  | 1418753_at   | 7.73E-03 | 5.30E-01 | 1.74 |
| 2810003C17Rik | RIKEN cDNA 2810003C17 gene                                                | 108897 | 1424263_at   | 2.60E-03 | 2.87E-01 | 1.74 |
| Sipa1l1       | signal-induced proliferation-associated 1 like 1                          | 217692 | 1440647_at   | 3.29E-03 | 3.29E-01 | 1.75 |
| Emp2          | epithelial membrane protein 2                                             | 13731  | 1433670_at   | 1.49E-02 | 7.30E-01 | 1.75 |
| Cd59a         | CD59a antigen                                                             | 12509  | 1429830_a_at | 2.23E-02 | 8.65E-01 | 1.75 |
| Cryl1         | crystallin, lambda 1                                                      | 68631  | 1447112_s_at | 1.21E-02 | 6.66E-01 | 1.75 |
| Rai1          | retinoic acid induced 1                                                   | 19377  | 1420454_at   | 4.30E-04 | 9.50E-02 | 1.75 |
| Atp1a2        | ATPase, Na <sup>+</sup> /K <sup>+</sup> transporting, alpha 2 polypeptide | 98660  | 1427465_at   | 1.58E-02 | 7.47E-01 | 1.75 |
| D11Bwg0517e   | DNA segment, Chr 11, Brigham & Women's Genetics 0517 expressed            | 52897  | 1456149_at   | 5.46E-03 | 4.47E-01 | 1.75 |
| 2310061F22Rik | RIKEN cDNA 2310061F22 gene                                                | 234839 | 1428350_at   | 7.73E-03 | 5.30E-01 | 1.75 |
| Kcna4         | potassium voltage-gated channel, shaker-related subfamily, member 4       | 16492  | 1438613_at   | 6.60E-06 | 4.58E-03 | 1.76 |
| ---           | Transcribed locus                                                         | ---    | 1419836_at   | 4.67E-02 | 1.00E+00 | 1.76 |
| Ascl1         | achaete-scute complex homolog 1 (Drosophila)                              | 17172  | 1450164_at   | 2.18E-03 | 2.59E-01 | 1.76 |
| Rhcg          | Rhesus blood group-associated C glycoprotein                              | 56315  | 1417362_at   | 3.03E-03 | 3.16E-01 | 1.76 |
| Kif20b        | kinesin family member 20B                                                 | 240641 | 1440924_at   | 8.07E-04 | 1.39E-01 | 1.76 |
| Etv5          | ets variant gene 5                                                        | 104156 | 1428142_at   | 2.45E-02 | 8.90E-01 | 1.77 |
| 4931406H21Rik | RIKEN cDNA 4931406H21 gene                                                | 77592  | 1432572_at   | 4.89E-04 | 1.04E-01 | 1.77 |
| Wif1          | Wnt inhibitory factor 1                                                   | 24117  | 1425425_a_at | 2.96E-03 | 3.15E-01 | 1.77 |
| Etv1          | ets variant gene 1                                                        | 14009  | 1450684_at   | 1.77E-02 | 7.84E-01 | 1.78 |
| Coro7         | coronin 7                                                                 | 78885  | 1428150_at   | 1.32E-02 | 6.92E-01 | 1.78 |
| Lpar4         | lysophosphatidic acid receptor 4                                          | 78134  | 1452424_at   | 2.51E-03 | 2.82E-01 | 1.78 |
| Apex2         | apurinic/apyrimidinic endonuclease 2                                      | 77622  | 1425954_a_at | 1.45E-02 | 7.22E-01 | 1.78 |
| Gm1060        | gene model 1060, (NCBI)                                                   | 381738 | 1455279_at   | 1.84E-04 | 5.21E-02 | 1.78 |
| Cotl1         | coactosin-like 1 (Dictyostelium)                                          | 72042  | 1416001_a_at | 4.91E-03 | 4.22E-01 | 1.79 |
| Dach2         | dachshund 2 (Drosophila)                                                  | 93837  | 1449823_at   | 5.62E-03 | 4.55E-01 | 1.79 |
| Trf           | transferrin                                                               | 22041  | 1425546_a_at | 1.48E-02 | 7.28E-01 | 1.79 |
| Rasgrp1       | RAS guanyl releasing protein 1                                            | 19419  | 1434295_at   | 4.59E-02 | 1.00E+00 | 1.79 |
| 1190002F15Rik | RIKEN cDNA 1190002F15 gene                                                | 381822 | 1441757_at   | 2.13E-08 | 8.00E-05 | 1.80 |
| Dnajc1        | DnaJ (Hsp40) homolog, subfamily C, member 1                               | 13418  | 1420501_at   | 1.14E-03 | 1.73E-01 | 1.80 |
| Syt5          | synaptotagmin V                                                           | 53420  | 1422531_at   | 1.20E-03 | 1.79E-01 | 1.80 |
| Stat4         | signal transducer and activator of transcription 4                        | 20849  | 1448713_at   | 2.03E-03 | 2.47E-01 | 1.80 |
| Lgi4          | leucine-rich repeat LGI family, member 4                                  | 243914 | 1434121_at   | 7.31E-03 | 5.18E-01 | 1.81 |
| Bnc2          | basonuclin 2                                                              | 242509 | 1438861_at   | 3.08E-02 | 9.63E-01 | 1.81 |
| Cd248         | CD248 antigen, endosialin                                                 | 70445  | 1417439_at   | 4.02E-04 | 8.97E-02 | 1.82 |
| Gna12         | guanine nucleotide binding protein, alpha 12                              | 14673  | 1421026_at   | 2.08E-02 | 8.33E-01 | 1.83 |
| Nfia          | Nuclear factor I/A                                                        | 18027  | 1446742_at   | 7.16E-04 | 1.30E-01 | 1.83 |
| Ankle1        | ankyrin repeat and LEM domain containing 1                                | 234396 | 1443978_at   | 1.46E-03 | 2.02E-01 | 1.83 |
| Ankrd34a      | ankyrin repeat domain 34A                                                 | 545554 | 1435809_at   | 2.35E-05 | 1.22E-02 | 1.84 |
| Ftl2          | ferritin light chain 2                                                    | 14325  | 1422301_at   | 5.88E-04 | 1.15E-01 | 1.85 |
| Adk           | adenosine kinase                                                          | 11534  | 1449641_at   | 5.64E-05 | 2.16E-02 | 1.86 |
| Clec14a       | C-type lectin domain family 14, member a                                  | 66864  | 1419467_at   | 7.98E-04 | 1.39E-01 | 1.86 |

|               |                                                                                         |        |              |          |          |      |
|---------------|-----------------------------------------------------------------------------------------|--------|--------------|----------|----------|------|
| Mcm5          | minichromosome maintenance deficient 5, cell division cycle 46 ( <i>S. cerevisiae</i> ) | 17218  | 1459658_at   | 1.61E-03 | 2.12E-01 | 1.87 |
| Slc13a3       | solute carrier family 13 (sodium-dependent dicarboxylate transporter), member 3         | 114644 | 1438377_x_at | 1.32E-04 | 4.07E-02 | 1.87 |
| AA407175      | expressed sequence AA407175                                                             | 105070 | 1459578_at   | 3.65E-02 | 1.00E+00 | 1.88 |
| Plekha8       | pleckstrin homology domain containing, family A (phosphoinositide binding specif        | 231999 | 1436128_at   | 2.80E-06 | 2.58E-03 | 1.88 |
| Cyp2j9        | cytochrome P450, family 2, subfamily j, polypeptide 9                                   | 74519  | 1424677_at   | 1.54E-03 | 2.07E-01 | 1.88 |
| Xaf1          | XIAP associated factor 1                                                                | 327959 | 1443621_at   | 7.36E-03 | 5.20E-01 | 1.89 |
| Omg           | oligodendrocyte myelin glycoprotein                                                     | 18377  | 1418212_at   | 6.50E-08 | 1.74E-04 | 1.89 |
| ---           | Transcribed locus                                                                       | ---    | 1444052_at   | 1.62E-03 | 2.12E-01 | 1.89 |
| Nptx2         | neuronal pentraxin 2                                                                    | 53324  | 1420720_at   | 5.04E-04 | 1.06E-01 | 1.90 |
| Lmcd1         | LIM and cysteine-rich domains 1                                                         | 30937  | 1424596_s_at | 4.61E-03 | 4.02E-01 | 1.90 |
| Nfatc4        | nuclear factor of activated T-cells, cytoplasmic, calcineurin-dependent 4               | 73181  | 1454369_a_at | 3.50E-02 | 1.00E+00 | 1.91 |
| 2810039B14Rik | RIKEN cDNA 2810039B14 gene                                                              | 72665  | 1453248_at   | 6.70E-05 | 2.40E-02 | 1.91 |
| 1110065P19Rik | RIKEN cDNA 1110065P19 gene                                                              | 68919  | 1452893_s_at | 4.68E-03 | 4.06E-01 | 1.91 |
| E2f4          | E2F transcription factor 4                                                              | 104394 | 1451480_at   | 3.47E-02 | 1.00E+00 | 1.92 |
| Ccnjl         | cyclin J-like                                                                           | 380694 | 1459978_x_at | 2.15E-03 | 2.58E-01 | 1.92 |
| Atp1a2        | ATPase, Na+/K+ transporting, alpha 2 polypeptide                                        | 98660  | 1434893_at   | 6.00E-03 | 4.71E-01 | 1.93 |
| Ears2         | glutamyl-tRNA synthetase 2 (mitochondrial)(putative)                                    | 67417  | 1451471_at   | 4.29E-04 | 9.50E-02 | 1.94 |
| Hif3a         | hypoxia inducible factor 3, alpha subunit                                               | 53417  | 1425428_at   | 2.52E-06 | 2.48E-03 | 1.94 |
| Rab3a         | RAB3A, member RAS oncogene family                                                       | 19339  | 1459980_x_at | 1.01E-03 | 1.64E-01 | 1.94 |
| 6330406I15Rik | RIKEN cDNA 6330406I15 gene                                                              | 70717  | 1452244_at   | 5.52E-05 | 2.13E-02 | 1.95 |
| Epb4.1        | erythrocyte protein band 4.1                                                            | 269587 | 1430369_at   | 5.55E-06 | 4.10E-03 | 1.96 |
| Sncaip        | synuclein, alpha interacting protein (synphilin)                                        | 67847  | 1430463_a_at | 1.26E-06 | 1.54E-03 | 1.96 |
| Sox3          | SRY-box containing gene 3                                                               | 20675  | 1450485_at   | 3.49E-03 | 3.43E-01 | 1.97 |
| 2610016C23Rik | RIKEN cDNA 2610016C23 gene                                                              | 71804  | 1432013_a_at | 3.03E-03 | 3.16E-01 | 1.98 |
| Rps6k1        | ribosomal protein S6 kinase-like 1                                                      | 238323 | 1426466_s_at | 1.16E-02 | 6.56E-01 | 2.00 |
| Rps17         | ribosomal protein S17                                                                   | 665772 | 1438502_x_at | 2.77E-06 | 2.58E-03 | 2.00 |
| 2900075N08Rik | RIKEN cDNA 2900075N08 gene                                                              | 72991  | 1453756_at   | 1.93E-03 | 2.39E-01 | 2.00 |
| Pitpmn1       | phosphatidylinositol membrane-associated 1                                              | 18739  | 1438854_x_at | 8.55E-04 | 1.43E-01 | 2.01 |
| EG666892      | predicted gene, EG666892                                                                | 666892 | 1447550_at   | 4.23E-03 | 3.83E-01 | 2.02 |
| Inhba         | inhibin beta-A                                                                          | 16323  | 1422053_at   | 3.38E-04 | 7.97E-02 | 2.04 |
| Uty           | ubiquitously transcribed tetratricopeptide repeat gene, Y chromosome                    | 22290  | 1422247_a_at | 3.17E-02 | 9.73E-01 | 2.04 |
| A930037G23Rik | RIKEN cDNA A930037G23 gene                                                              | 320678 | 1454628_at   | 1.20E-03 | 1.79E-01 | 2.05 |
| Marcks        | Myristoylated alanine rich protein kinase C substrate                                   | 17118  | 1430311_at   | 1.07E-04 | 3.49E-02 | 2.05 |
| Rapgef3       | Rap guanine nucleotide exchange factor (GEF) 3                                          | 223864 | 1424471_at   | 2.67E-05 | 1.33E-02 | 2.05 |
| Msrb3         | methionine sulfoxide reductase B3                                                       | 320183 | 1439151_at   | 1.72E-04 | 5.02E-02 | 2.05 |
| Gria4         | glutamate receptor, ionotropic, AMPA4 (alpha 4)                                         | 14802  | 1435722_at   | 4.02E-05 | 1.68E-02 | 2.07 |
| Hdlbp         | high density lipoprotein (HDL) binding protein                                          | 110611 | 1415988_at   | 1.86E-02 | 7.94E-01 | 2.08 |
| Bmp7          | bone morphogenetic protein 7                                                            | 12162  | 1432410_a_at | 1.81E-04 | 5.18E-02 | 2.10 |
| Etv5          | ets variant gene 5                                                                      | 104156 | 1450082_s_at | 4.50E-03 | 3.95E-01 | 2.11 |
| Tmem179b      | transmembrane protein 179B                                                              | 67706  | 1455874_at   | 6.14E-04 | 1.17E-01 | 2.11 |
| Ppil5         | peptidylprolyl isomerase (cyclophilin) like 5                                           | 69706  | 1427506_at   | 1.12E-04 | 3.57E-02 | 2.14 |
| 3300002P09Rik | RIKEN cDNA 3300002P09 gene                                                              | 70246  | 1453863_at   | 8.72E-05 | 2.96E-02 | 2.16 |
| Rpsud2        | RNA pseudouridylyl synthase domain containing 2                                         | 271842 | 1453138_at   | 1.06E-05 | 6.84E-03 | 2.16 |
| ---           | ---                                                                                     | ---    | 1459817_at   | 1.04E-06 | 1.34E-03 | 2.19 |
| Fgf17         | fibroblast growth factor 17                                                             | 14171  | 1421523_at   | 2.59E-02 | 9.09E-01 | 2.20 |
| ---           | ---                                                                                     | ---    | 1458823_at   | 1.09E-04 | 3.50E-02 | 2.20 |
| Fkrp          | fukutin related protein                                                                 | 243853 | 1437536_at   | 1.98E-02 | 8.15E-01 | 2.22 |
| ---           | Transcribed locus                                                                       | ---    | 1459072_at   | 1.42E-02 | 7.13E-01 | 2.22 |
| Arsg          | arylsulfatase G                                                                         | 74008  | 1452277_at   | 6.13E-03 | 4.76E-01 | 2.24 |
| Mapk8ip3      | mitogen-activated protein kinase 8 interacting protein 3                                | 30957  | 1416437_a_at | 8.24E-04 | 1.40E-01 | 2.24 |
| Comtd1        | catechol-O-methyltransferase domain containing 1                                        | 69156  | 1428635_at   | 4.00E-07 | 6.44E-04 | 2.25 |
| Gem           | GTP binding protein (gene overexpressed in skeletal muscle)                             | 14579  | 1426063_a_at | 1.79E-06 | 1.90E-03 | 2.27 |
| ---           | Transcribed locus                                                                       | ---    | 1446982_at   | 5.99E-04 | 1.16E-01 | 2.28 |
| Grm1          | glutamate receptor, metabotropic 1                                                      | 14816  | 1425700_at   | 5.85E-06 | 4.26E-03 | 2.31 |
| Tekt2         | tektin 2                                                                                | 24084  | 1418484_at   | 2.95E-04 | 7.24E-02 | 2.31 |
| Ccnb1         | Cyclin B1                                                                               | 268697 | 1419944_at   | 6.07E-04 | 1.17E-01 | 2.40 |
| ---           | Transcribed locus                                                                       | ---    | 1456820_at   | 4.66E-04 | 1.01E-01 | 2.48 |
| Zadh1         | zinc binding alcohol dehydrogenase, domain containing 1                                 | 77219  | 1429474_at   | 4.58E-05 | 1.88E-02 | 2.48 |

|               |                                                                                    |        |              |          |          |      |
|---------------|------------------------------------------------------------------------------------|--------|--------------|----------|----------|------|
| Zfp618        | zinc fingerprotein 618                                                             | 72701  | 1453247_at   | 1.43E-05 | 8.37E-03 | 2.52 |
| Troap         | trophinin associated protein                                                       | 78733  | 1433790_at   | 1.31E-03 | 1.90E-01 | 2.56 |
| Hsd3b2        | hydroxy-delta-5-steroid dehydrogenase, 3 beta- and steroid delta-isomerase 2       | 15497  | 1460232_s_at | 2.31E-06 | 2.37E-03 | 2.57 |
| ---           | Transcribed locus, weakly similar to NP_001034645.1 RAD54 homolog B [Mus musculus] | ---    | 1447488_at   | 3.49E-05 | 1.57E-02 | 2.62 |
| Ptk7          | PTK7 protein tyrosine kinase 7                                                     | 71461  | 1452589_at   | 5.95E-04 | 1.16E-01 | 2.62 |
| Grb10         | growth factor receptor bound protein 10                                            | 14783  | 1425457_a_at | 5.26E-05 | 2.11E-02 | 2.78 |
| Ipo7          | importin 7                                                                         | 233726 | 1458165_at   | 3.02E-08 | 1.05E-04 | 2.85 |
| Slc16a3       | solute carrier family 16 (monocarboxylic acid transporters), member 3              | 80879  | 1449005_at   | 2.81E-05 | 1.38E-02 | 2.91 |
| Nelf          | nasal embryonic LHRH factor                                                        | 56876  | 1439398_x_at | 3.63E-07 | 6.07E-04 | 3.06 |
| 2610021K21Rik | RIKEN cDNA 2610021K21 gene                                                         | 78767  | 1431667_s_at | 4.41E-07 | 6.85E-04 | 3.06 |
| Gfap          | glial fibrillary acidic protein                                                    | 14580  | 1426508_at   | 3.40E-06 | 3.01E-03 | 3.62 |
| Ptchd1        | patched domain containing 1                                                        | 211612 | 1457649_x_at | 1.51E-07 | 3.25E-04 | 5.86 |

**Table 4** Tissue expression pattern of significantly enriched genes (HEK 293 *MYST4*

siRNA and HeLa *MYST4* siRNA vs HEK 293 ctrl and HeLa ctrl

[ $p < 0.05$ ;  $FC < -1.5$  or  $> 1.5$ ])

| Uniprot-Term       | Observed genes | %    | p-value* | Benjamini* |
|--------------------|----------------|------|----------|------------|
| Brain              | 227            | 29.7 | 6.20E-08 | 4.60E-05   |
| Placenta           | 108            | 14.1 | 8.70E-06 | 3.30E-03   |
| Epithelium         | 79             | 10.3 | 5.30E-05 | 1.30E-02   |
| Liver              | 58             | 7.6  | 1.50E-02 | 7.10E-01   |
| Skin               | 57             | 7.5  | 3.00E-03 | 3.60E-01   |
| Kidney             | 48             | 6.3  | 6.50E-03 | 5.00E-01   |
| Bone marrow        | 34             | 4.5  | 5.80E-05 | 1.10E-02   |
| Pancreas           | 33             | 4.3  | 1.40E-02 | 7.20E-01   |
| Muscle             | 27             | 3.5  | 4.10E-02 | 8.30E-01   |
| Skeletal muscle    | 21             | 2.7  | 1.50E-02 | 6.40E-01   |
| Other:             |                |      |          |            |
| T-cell             | 14             | 1.8  | 2.70E-02 | 7.50E-01   |
| Platelet           | 14             | 1.8  | 3.70E-02 | 8.30E-01   |
| Fetal kidney       | 10             | 1.3  | 6.20E-03 | 5.40E-01   |
| Fibroblast         | 8              | 1.0  | 2.40E-02 | 7.60E-01   |
| Urinary bladder    | 8              | 1.0  | 4.60E-02 | 8.50E-01   |
| Foreskin           | 6              | 0.8  | 1.50E-02 | 6.70E-01   |
| Aortic endothelium | 4              | 0.5  | 2.00E-02 | 7.20E-01   |
| Endometrial tumor  | 4              | 0.5  | 2.50E-02 | 7.50E-01   |
| Uterus endothel    | 4              | 0.5  | 3.90E-02 | 8.30E-01   |

\*p-values and Benjamini-Hochberg p-values were calculated using the DAVID functional annotation of Uniprot tissue expression

**Table 5** GO intracellular component categories of significantly enriched genes (HEK 293 *MYST4* siRNA and HeLa *MYST4* siRNA vs HEK 293 ctrl and HeLa ctrl [p < 0.05; FC < -1.5 or > 1.5])

| GO-Term               | Observed genes | %    | p-value* | Benjamini* |
|-----------------------|----------------|------|----------|------------|
| Cytoplasm             | 238            | 43.0 | 2,0E-7   | 5,7E-5     |
| Nucleus               | 160            | 28.9 | 1,6E-2   | 4,3E-1     |
| Endoplasmic reticulum | 47             | 8.5  | 2,6E-5   | 2,5E-3     |
| Golgi apparatus       | 31             | 5.6  | 9,9E-3   | 3,1E-1     |
| Chromosome            | 23             | 4.2  | 2,4E-3   | 9,9E-2     |
| Chromatin             | 16             | 2.9  | 6,4E-4   | 3,6E-2     |
| Nucleosome            | 14             | 2.5  | 1,5E-7   | 6,7E-5     |
| Actin cytoskeleton    | 12             | 2.2  | 1,6E-2   | 9,5E-2     |
| Endosome              | 12             | 2.2  | 3,1E-2   | 6,3E-1     |

\*p-values and Benjamini-Hochberg p-values were calculated using the DAVID functional annotation of GO Molecular Function Categories

**Table 6** GO molecular function categories of significantly enriched genes (HEK 293 *MYST4* siRNA and HeLa *MYST4* siRNA vs HEK 293 ctrl and HeLa ctrl [p < 0.05; FC < -1.5 or > 1.5])

| GO-Term                          | Observed genes | %    | p-value* | Benjamini* |
|----------------------------------|----------------|------|----------|------------|
| Binding                          | 403            | 40.8 | 1.00E-06 | 1.50E-03   |
| Protein binding                  | 256            | 25.9 | 1.10E-07 | 3.00E-04   |
| Catalytic activity               | 184            | 18.6 | 4.50E-02 | 1.00E+00   |
| Phosphotransferase activity      | 32             | 3.2  | 4.30E-02 | 1.00E+00   |
| Transcription factor binding     | 32             | 3.2  | 4.60E-02 | 1.00E+00   |
| Protein kinase activity          | 28             | 2.8  | 4.30E-02 | 1.00E+00   |
| Serine/threonine kinase activity | 21             | 2.1  | 2.60E-02 | 1.00E+00   |
| GTPase activity                  | 13             | 1.3  | 1.50E-02 | 1.00E+00   |
| Ligase activity                  | 12             | 1.2  | 4.60E-02 | 1.00E+00   |
| Protein binding, bridging        | 7              | 0.7  | 3.50E-02 | 1.00E+00   |

\*p-values and Benjamini-Hochberg p-values were calculated using the DAVID functional annotation of GO Molecular Function Categories

**Table 7** GO intracellular component categories of differentially expressed genes(Mouse  $Qkf^{gt/gt}$  adult dorsal cortex vs. wildtype [FC < -1.5 or > 1.5])

| GO-Term               | Observed genes | %    | p-value* | Benjamini* |
|-----------------------|----------------|------|----------|------------|
| Cytoplasm             | 104            | 43.7 | 1.05E-06 | 2.06E-04   |
| Nucleus               | 63             | 26.5 | 6.37E-02 | 8.73E-01   |
| Endoplasmic reticulum | 47             | 19.7 | 2,6E-5   | 2,5E-3     |
| Golgi apparatus       | 13             | 5.5  | 6.90E-02 | 8.74E-01   |
| Actin cytoskeleton    | 5              | 2.1  | 2.90E-01 | 9.99E-01   |
| Chromosome            | 2              | 0.8  | 9.89E-01 | 1.00       |
| Chromatin             | 2              | 0.8  | 8.88E-01 | 1.00       |
| Endosome              | 2              | 0.8  | 8.88E-01 | 1.00       |

\*p-values and Benjamini-Hochberg p-values were calculated using the DAVID functional annotation of GO Molecular Function Categories

**Table 8** GO molecular function categories of significantly enriched genes(Mouse  $Qkf^{gt/gt}$  adult dorsal cortex vs. wildtype [ $p < 0.05$ ; FC < -1.5 or > 1.5])

| GO-Term           | Observed genes | %    | p-value* | Benjamini* |
|-------------------|----------------|------|----------|------------|
| Binding           | 39             | 40.2 | 1.9E-6   | 5,0E-3     |
| Protein binding   | 26             | 26.8 | 1.3E-4   | 1,6E-1     |
| Metal ion binding | 16             | 16.5 | 1.9E-2   | 1,0E0      |
| Ion binding       | 16             | 16.5 | 2.3E-2   | 1,0E0      |

\*p-values and Benjamini-Hochberg p-values were calculated using the DAVID functional annotation of GO Molecular Function Categories

**Table 9** GO intracellular component categories of differentially expressed genes(Mouse  $Qkfgt/gt$  E12.5 dorsal telencephalon vs wildtype [FC < -1.5 or > 1.5])

| GO-Term               | Observed genes | %    | p-value* | Benjamini* |
|-----------------------|----------------|------|----------|------------|
| Cytoplasm             | 114            | 43.7 | 2.76E-02 | 9.13E-01   |
| Nucleus               | 96             | 26.5 | 1.30E-03 | 6.41E-01   |
| Golgi apparatus       | 15             | 19.7 | 1.51E-01 | 9.96E-01   |
| Endoplasmic reticulum | 14             | 5.5  | 5.06E-01 | 1.00E+00   |
| Extracellular matrix  | 11             | 2.1  | 3.67E-02 | 9.13E-01   |
| Chromosome            | 10             | 0.8  | 1.64E-01 | 1.00       |
| Endosome              | 5              | 0.8  | 3.54E-01 | 1.00       |
| Actin cytoskeleton    | 4              |      | 7.32E-01 | 1.00       |
| Chromatin             | 4              | 0.8  | 5.81E-01 | 1.00       |

\*p-values and Benjamini-Hochberg p-values were calculated using the DAVID functional annotation of GO Molecular Function Categories

**Table 10** GO molecular funktion catagories of significantly enriched genes  
 (Mouse Qkfgt/gt E12.5 dorsal telencephalon vs wildtype [FC < -1.5 or > 1.5])

| <b>GO-Term</b>                   | <b>Observed genes</b> | <b>%</b> | <b>p-value*</b> | <b>Benjamini*</b> |
|----------------------------------|-----------------------|----------|-----------------|-------------------|
| Binding                          | 337                   | 56.1     | 3.45E-07        | 6.21E-06          |
| Catalytic activity               | 161                   | 26.8     | 3.51E-02        | 1.49E-01          |
| Transporter activity             | 53                    | 8.8      | 2.00E-03        | 1.78E-02          |
| Transcription regulator activity | 50                    | 8.3      | 2.54E-03        | 1.51E-02          |

\*p-values and Benjamini-Hochberg p-values were caclulated using the DAVID funtional annotation of GO Molecular Function Catagories



**Table 11** KEGG pathways of significantly enriched genes (HEK 293 *MYST4* siRNA and HeLa *MYST4* siRNA vs HEK 293 ctrl and HeLa ctrl [p < 0.05; FC < -1.5 or > 1.5]) (\* significant corrected gamma p-value < 0.05, Pathway Express calculation)

| KEGG pathway name                      | Rank | Impact factor | No. genes in pathway | No. input genes in pathway | % Pathwaygenes in input | p-value     |           |          |                 |
|----------------------------------------|------|---------------|----------------------|----------------------------|-------------------------|-------------|-----------|----------|-----------------|
|                                        |      |               |                      |                            |                         | uncorrected | corrected | gamma    | corrected gamma |
| Phosphatidylinositol signaling system* | 1    | 48.9          | 77                   | 2                          | 2.6                     | 4.63E-02    | 4.63E-02  | 2.81E-20 | 2.81E-20        |
| Circadian rhythm*                      | 2    | 22.8          | 13                   | 1                          | 7.7                     | 5.64E-02    | 5.64E-02  | 2.95E-09 | 2.95E-09        |
| Insulin signaling pathway*             | 3    | 20.3          | 138                  | 9                          | 6.5                     | 9.71E-09    | 9.71E-09  | 3.20E-08 | 3.20E-08        |
| MAPK signaling pathway*                | 4    | 19.9          | 265                  | 11                         | 4.2                     | 2.49E-08    | 2.49E-08  | 4.94E-08 | 4.94E-08        |
| Wnt signaling pathway*                 | 5    | 19.4          | 148                  | 9                          | 6.1                     | 1.81E-08    | 1.81E-08  | 7.56E-08 | 7.56E-08        |
| Melanoma*                              | 6    | 19.3          | 71                   | 7                          | 9.9                     | 2.90E-08    | 2.90E-08  | 8.82E-08 | 8.82E-08        |
| Apoptosis*                             | 7    | 18.0          | 84                   | 7                          | 8.3                     | 9.43E-08    | 9.43E-08  | 2.93E-07 | 2.93E-07        |
| Regulation of actin cytoskeleton*      | 8    | 17.1          | 211                  | 9                          | 4.3                     | 3.47E-07    | 3.47E-07  | 6.94E-07 | 6.94E-07        |
| GnRH signaling pathway*                | 9    | 16.8          | 97                   | 7                          | 7.2                     | 2.55E-07    | 2.55E-07  | 9.11E-07 | 9.11E-07        |
| Glioma*                                | 10   | 16.1          | 64                   | 6                          | 9.4                     | 4.03E-07    | 4.03E-07  | 1.71E-06 | 1.71E-06        |
| Glycan structures - biosynthesis 1*    | 11   | 14.6          | 122                  | 7                          | 5.7                     | 1.22E-06    | 1.22E-06  | 6.90E-06 | 6.90E-06        |
| Colorectal cancer*                     | 12   | 14.4          | 84                   | 6                          | 7.1                     | 2.03E-06    | 2.03E-06  | 8.74E-06 | 8.74E-06        |
| Gap junction*                          | 13   | 14.2          | 96                   | 5                          | 5.2                     | 6.30E-05    | 6.30E-05  | 1.06E-05 | 1.06E-05        |
| Cell Communication*                    | 14   | 14.2          | 138                  | 7                          | 5.1                     | 1.96E-06    | 1.96E-06  | 1.08E-05 | 1.08E-05        |
| Adherens junction*                     | 15   | 13.8          | 75                   | 2                          | 2.7                     | 4.41E-02    | 4.41E-02  | 1.51E-05 | 1.51E-05        |
| Pancreatic cancer*                     | 16   | 12.5          | 73                   | 5                          | 6.8                     | 1.86E-05    | 1.86E-05  | 5.17E-05 | 5.17E-05        |
| Focal adhesion*                        | 17   | 12.5          | 199                  | 7                          | 3.5                     | 2.85E-05    | 2.85E-05  | 5.22E-05 | 5.22E-05        |
| Fc epsilon RI signaling pathway*       | 18   | 12.4          | 77                   | 5                          | 6.5                     | 2.26E-05    | 2.26E-05  | 5.31E-05 | 5.31E-05        |
| ErbB signaling pathway*                | 19   | 12.1          | 87                   | 5                          | 5.7                     | 4.35E-05    | 4.35E-05  | 7.11E-05 | 7.11E-05        |
| Endometrial cancer*                    | 20   | 11.8          | 52                   | 4                          | 7.7                     | 8.47E-05    | 8.47E-05  | 9.89E-05 | 9.89E-05        |
| Prostate cancer*                       | 21   | 11.6          | 89                   | 5                          | 5.6                     | 4.59E-05    | 4.59E-05  | 1.11E-04 | 1.11E-04        |
| Long-term potentiation*                | 22   | 11.6          | 69                   | 4                          | 5.8                     | 2.55E-04    | 2.55E-04  | 1.17E-04 | 1.17E-04        |
| Non-small cell lung cancer*            | 23   | 11.5          | 54                   | 4                          | 7.4                     | 9.82E-05    | 9.82E-05  | 1.24E-04 | 1.24E-04        |
| Melanogenesis*                         | 24   | 11.4          | 101                  | 5                          | 5.0                     | 8.47E-05    | 8.47E-05  | 1.33E-04 | 1.33E-04        |
| Toll-like receptor signaling pathway*  | 25   | 10.8          | 102                  | 5                          | 4.9                     | 9.30E-05    | 9.30E-05  | 2.41E-04 | 2.41E-04        |

|                                            |    |      |     |   |       |          |          |          |          |
|--------------------------------------------|----|------|-----|---|-------|----------|----------|----------|----------|
| Calcium signaling pathway*                 | 26 | 10.7 | 175 | 6 | 3.4   | 1.28E-04 | 1.28E-04 | 2.53E-04 | 2.53E-04 |
| Long-term depression*                      | 27 | 10.7 | 76  | 4 | 5.3   | 3.70E-04 | 3.70E-04 | 2.74E-04 | 2.74E-04 |
| Natural killer cell mediated cytotoxicity* | 28 | 10.6 | 131 | 5 | 3.8   | 2.24E-04 | 2.24E-04 | 2.80E-04 | 2.80E-04 |
| VEGF signaling pathway*                    | 29 | 10.3 | 71  | 4 | 5.6   | 2.70E-04 | 2.70E-04 | 3.87E-04 | 3.87E-04 |
| Thyroid cancer*                            | 30 | 9.4  | 29  | 3 | 10.3  | 2.87E-04 | 2.87E-04 | 8.71E-04 | 8.71E-04 |
| Neurodegenerative Diseases*                | 31 | 9.2  | 30  | 3 | 10.0  | 3.18E-04 | 3.18E-04 | 1.02E-03 | 1.02E-03 |
| Bladder cancer*                            | 32 | 9.0  | 42  | 3 | 7.1   | 8.65E-04 | 8.65E-04 | 1.28E-03 | 1.28E-03 |
| ECM-receptor interaction*                  | 33 | 8.9  | 87  | 4 | 4.6   | 5.92E-04 | 5.92E-04 | 1.33E-03 | 1.33E-03 |
| Small cell lung cancer*                    | 34 | 8.8  | 87  | 4 | 4.6   | 6.18E-04 | 6.18E-04 | 1.46E-03 | 1.46E-03 |
| Notch signaling pathway*                   | 35 | 8.4  | 46  | 3 | 6.5   | 1.13E-03 | 1.13E-03 | 2.19E-03 | 2.19E-03 |
| Cytokine-cytokine receptor interaction*    | 36 | 8.2  | 259 | 6 | 2.3   | 1.00E-03 | 1.00E-03 | 2.43E-03 | 2.43E-03 |
| Renal cell carcinoma*                      | 37 | 8.0  | 69  | 3 | 4.3   | 3.62E-03 | 3.62E-03 | 2.98E-03 | 2.98E-03 |
| Basal cell carcinoma*                      | 38 | 7.9  | 55  | 2 | 3.6   | 2.42E-02 | 2.42E-02 | 3.44E-03 | 3.44E-03 |
| p53 signaling pathway*                     | 39 | 7.8  | 68  | 3 | 4.4   | 3.48E-03 | 3.48E-03 | 3.64E-03 | 3.64E-03 |
| B cell receptor signaling pathway*         | 40 | 7.7  | 64  | 3 | 4.7   | 2.93E-03 | 2.93E-03 | 3.82E-03 | 3.82E-03 |
| Dorso-ventral axis formation*              | 41 | 7.6  | 28  | 2 | 7.1   | 6.41E-03 | 6.41E-03 | 4.28E-03 | 4.28E-03 |
| Hedgehog signaling pathway*                | 42 | 7.6  | 57  | 3 | 5.3   | 1.90E-03 | 1.90E-03 | 4.49E-03 | 4.49E-03 |
| Alzheimer"s disease*                       | 43 | 7.5  | 22  | 2 | 9.1   | 4.28E-03 | 4.28E-03 | 4.60E-03 | 4.60E-03 |
| Chronic myeloid leukemia*                  | 44 | 7.5  | 76  | 3 | 3.9   | 4.75E-03 | 4.75E-03 | 4.65E-03 | 4.65E-03 |
| Jak-STAT signaling pathway*                | 45 | 7.2  | 153 | 4 | 2.6   | 4.88E-03 | 4.88E-03 | 6.04E-03 | 6.04E-03 |
| T cell receptor signaling pathway*         | 46 | 7.2  | 93  | 3 | 3.2   | 8.31E-03 | 8.31E-03 | 6.29E-03 | 6.29E-03 |
| TGF-beta signaling pathway*                | 47 | 7.2  | 89  | 3 | 3.4   | 6.92E-03 | 6.92E-03 | 6.38E-03 | 6.38E-03 |
| Prion diseases*                            | 48 | 6.3  | 1   | 1 | 100.0 | 4.45E-03 | 4.45E-03 | 1.34E-02 | 1.34E-02 |
| Antigen processing and presentation*       | 49 | 6.2  | 88  | 3 | 3.4   | 5.11E-03 | 5.11E-03 | 1.50E-02 | 1.50E-02 |
| Type II diabetes mellitus*                 | 50 | 5.8  | 44  | 2 | 4.5   | 1.51E-02 | 1.51E-02 | 2.03E-02 | 2.03E-02 |
| Glycan structures - degradation*           | 51 | 5.7  | 30  | 2 | 6.7   | 7.87E-03 | 7.87E-03 | 2.17E-02 | 2.17E-02 |
| Tight junction*                            | 52 | 5.7  | 135 | 3 | 2.2   | 2.21E-02 | 2.21E-02 | 2.28E-02 | 2.28E-02 |
| Axon guidance*                             | 53 | 5.6  | 128 | 3 | 2.3   | 1.96E-02 | 1.96E-02 | 2.34E-02 | 2.34E-02 |
| Acute myeloid leukemia*                    | 54 | 5.6  | 57  | 2 | 3.5   | 2.67E-02 | 2.67E-02 | 2.52E-02 | 2.52E-02 |

|                                                            |    |     |     |   |     |          |          |          |          |
|------------------------------------------------------------|----|-----|-----|---|-----|----------|----------|----------|----------|
| SNARE interactions in vesicular transport*                 | 55 | 5.5 | 38  | 2 | 5.3 | 1.18E-02 | 1.18E-02 | 2.73E-02 | 2.73E-02 |
| Nucleotide excision repair*                                | 56 | 5.3 | 43  | 2 | 4.7 | 1.51E-02 | 1.51E-02 | 3.17E-02 | 3.17E-02 |
| Cell adhesion molecules (CAMs)*                            | 57 | 5.2 | 133 | 3 | 2.3 | 1.92E-02 | 1.92E-02 | 3.40E-02 | 3.40E-02 |
| mTOR signaling pathway*                                    | 58 | 5.1 | 51  | 2 | 3.9 | 2.01E-02 | 2.01E-02 | 3.74E-02 | 3.74E-02 |
| Vibrio cholerae infection*                                 | 59 | 5.0 | 59  | 2 | 3.4 | 2.85E-02 | 2.85E-02 | 4.15E-02 | 4.15E-02 |
| Epithelial cell signaling in Helicobacter pylori infection | 60 | 4.7 | 69  | 2 | 2.9 | 3.80E-02 | 3.80E-02 | 5.32E-02 | 5.32E-02 |
| Adipocytokine signaling pathway                            | 61 | 4.4 | 72  | 2 | 2.8 | 4.10E-02 | 4.10E-02 | 6.85E-02 | 6.85E-02 |
| Dentatorubropallidolusian atrophy (DRPLA)                  | 62 | 4.2 | 15  | 1 | 6.7 | 6.06E-02 | 6.06E-02 | 7.67E-02 | 7.67E-02 |
| Maturity onset diabetes of the young                       | 63 | 4.2 | 25  | 1 | 4.0 | 9.36E-02 | 9.36E-02 | 7.92E-02 | 7.92E-02 |
| Olfactory transduction                                     | 64 | 4.0 | 383 | 2 | 0.5 | 9.18E-02 | 9.18E-02 | 9.32E-02 | 9.32E-02 |
| Taste transduction                                         | 65 | 3.6 | 53  | 1 | 1.9 | 1.86E-01 | 1.86E-01 | 1.21E-01 | 1.21E-01 |
| Cell cycle                                                 | 66 | 3.6 | 112 | 2 | 1.8 | 8.91E-02 | 8.91E-02 | 1.24E-01 | 1.24E-01 |
| Renin-angiotensin system                                   | 67 | 3.5 | 17  | 1 | 5.9 | 7.31E-02 | 7.31E-02 | 1.33E-01 | 1.33E-01 |
| Neuroactive ligand-receptor interaction                    | 69 | 3.4 | 254 | 3 | 1.2 | 1.02E-01 | 1.02E-01 | 1.52E-01 | 1.52E-01 |
| Proteasome                                                 | 70 | 3.3 | 22  | 1 | 4.5 | 9.36E-02 | 9.36E-02 | 1.56E-01 | 1.56E-01 |
| Biosynthesis of unsaturated fatty acids                    | 71 | 3.2 | 23  | 1 | 4.3 | 9.76E-02 | 9.76E-02 | 1.66E-01 | 1.66E-01 |
| Mismatch repair                                            | 72 | 3.2 | 22  | 1 | 4.5 | 9.36E-02 | 9.36E-02 | 1.66E-01 | 1.66E-01 |
| Huntington"s disease                                       | 73 | 3.2 | 30  | 1 | 3.3 | 1.25E-01 | 1.25E-01 | 1.66E-01 | 1.66E-01 |
| Base excision repair                                       | 74 | 2.9 | 33  | 1 | 3.0 | 1.37E-01 | 1.37E-01 | 2.09E-01 | 2.09E-01 |
| DNA replication                                            | 75 | 2.8 | 35  | 1 | 2.9 | 1.45E-01 | 1.45E-01 | 2.30E-01 | 2.30E-01 |
| Complement and coagulation cascades                        | 76 | 2.6 | 69  | 1 | 1.4 | 2.65E-01 | 2.65E-01 | 2.60E-01 | 2.60E-01 |
| Pathogenic Escherichia coli infection                      | 77 | 2.5 | 51  | 1 | 2.0 | 1.97E-01 | 1.97E-01 | 2.80E-01 | 2.80E-01 |
| Glycan structures - biosynthesis 2                         | 78 | 2.4 | 63  | 1 | 1.6 | 2.45E-01 | 2.45E-01 | 3.02E-01 | 3.02E-01 |
| Ribosome                                                   | 79 | 2.4 | 91  | 1 | 1.1 | 2.65E-01 | 2.65E-01 | 3.13E-01 | 3.13E-01 |
| PPAR signaling pathway                                     | 80 | 2.3 | 69  | 1 | 1.4 | 2.62E-01 | 2.62E-01 | 3.41E-01 | 3.41E-01 |
| Leukocyte transendothelial migration                       | 81 | 1.8 | 116 | 1 | 0.9 | 4.02E-01 | 4.02E-01 | 4.52E-01 | 4.52E-01 |
| Ubiquitin mediated proteolysis                             | 82 | 1.8 | 130 | 1 | 0.8 | 4.36E-01 | 4.36E-01 | 4.58E-01 | 4.58E-01 |

**Table 12** KEGG pathways of significantly enriched genes

(HEK 293 *MYST4* siRNA and HeLa *MYST4* siRNA vs HEK 293 ctrl and HeLa ctrl [ $p < 0.05$ ; FC  $< -1.5$  or  $> 1.5$ ])

(\* significant corrected gamma p-value  $< 0.05$ , DAVID functional annotation)

| <b>KEGG pathway name</b>             | <b>p-value</b> | <b>Fold enrichment</b> |
|--------------------------------------|----------------|------------------------|
| Melanoma*                            | 2.75E-03       | 4.86                   |
| Insulin signaling pathway*           | 5.98E-03       | 3.22                   |
| Apoptosis*                           | 7.30E-03       | 3.99                   |
| Glioma*                              | 7.48E-03       | 4.79                   |
| Wnt signaling pathway*               | 1.20E-02       | 2.85                   |
| GnRH signaling pathway*              | 1.24E-02       | 3.57                   |
| Colorectal cancer*                   | 3.01E-02       | 3.38                   |
| Regulation of actin cytoskeleton*    | 3.11E-02       | 2.24                   |
| Glycan structures - biosynthesis 1*  | 3.65E-02       | 2.79                   |
| MAPK signaling pathway*              | 3.92E-02       | 2.03                   |
| Cell Communication                   | 6.07E-02       | 2.46                   |
| Pancreatic cancer                    | 6.29E-02       | 3.28                   |
| Fc epsilon RI signaling pathway      | 6.55E-02       | 3.24                   |
| Endometrial cancer                   | 8.33E-02       | 3.83                   |
| Non-small cell lung cancer           | 9.12E-02       | 3.68                   |
| ErbB signaling pathway               | 9.75E-02       | 2.82                   |
| Prostate cancer                      | 1.04E-01       | 2.75                   |
| Thyroid cancer                       | 1.06E-01       | 5.32                   |
| Focal adhesion                       | 1.15E-01       | 1.93                   |
| Gap junction                         | 1.32E-01       | 2.52                   |
| O-Glycan biosynthesis                | 1.41E-01       | 4.49                   |
| Melanogenesis                        | 1.43E-01       | 2.44                   |
| Long-term potentiation               | 1.50E-01       | 2.95                   |
| Toll-like receptor signaling pathway | 1.59E-01       | 2.35                   |

|                                           |          |      |
|-------------------------------------------|----------|------|
| VEGF signaling pathway                    | 1.80E-01 | 2.70 |
| Neurodegenerative Diseases                | 1.92E-01 | 3.68 |
| Bladder cancer                            | 1.99E-01 | 3.59 |
| Long-term depression                      | 2.01E-01 | 2.55 |
| Notch signaling pathway                   | 2.53E-01 | 3.06 |
| Small cell lung cancer                    | 2.67E-01 | 2.20 |
| ECM-receptor interaction                  | 2.73E-01 | 2.18 |
| Natural killer cell mediated cytotoxicity | 2.76E-01 | 1.86 |
| Calcium signaling pathway                 | 2.89E-01 | 1.65 |
| Hedgehog signaling pathway                | 3.30E-01 | 2.52 |
| B cell receptor signaling pathway         | 3.90E-01 | 2.21 |
| Renal cell carcinoma                      | 4.05E-01 | 2.14 |
| p53 signaling pathway                     | 4.12E-01 | 2.11 |
| Alzheimer's disease                       | 4.43E-01 | 3.42 |
| Dorso-ventral axis formation              | 4.43E-01 | 3.42 |
| Chronic myeloid leukemia                  | 4.55E-01 | 1.94 |
| Olfactory transduction                    | 4.55E-01 | 3.30 |
| Glycan structures - degradation           | 4.77E-01 | 3.09 |
| Antigen processing and presentation       | 4.96E-01 | 1.80 |
| TGF-beta signaling pathway                | 5.59E-01 | 1.60 |
| SNARE interactions in vesicular transport | 5.68E-01 | 2.39 |
| T cell receptor signaling pathway         | 5.83E-01 | 1.53 |
| Type II diabetes mellitus                 | 6.11E-01 | 2.13 |
| Jak-STAT signaling pathway                | 6.14E-01 | 1.26 |
| Cytokine-cytokine receptor interaction    | 6.17E-01 | 1.12 |
| mTOR signaling pathway                    | 6.57E-01 | 1.88 |
| Acute myeloid leukemia                    | 6.85E-01 | 1.74 |
| Basal cell carcinoma                      | 6.91E-01 | 1.71 |

---

**Table 13** KEGG pathways of significantly enriched genes (Mouse Qki<sup>fgt/gt</sup> adult dorsal cortex vs. wildtype [ $p < 0.05$ ; FC  $< -1.5$  or  $> 1.5$ ])

(\* significant corrected gamma p-value  $< 0.05$ , Pathway Express calculation)

| KEGG pathway name                          | Rank | Impact factor | No. genes in pathway | No. input genes in pathway | % Pathwaygenes in input | p-value     |           |          |                 |
|--------------------------------------------|------|---------------|----------------------|----------------------------|-------------------------|-------------|-----------|----------|-----------------|
|                                            |      |               |                      |                            |                         | uncorrected | corrected | gamma    | corrected gamma |
| Neuroactive ligand-receptor interaction*   | 1    | 27.1          | 256                  | 11                         | 4.3                     | 5.80E-12    | 5.80E-12  | 4.93E-11 | 4.93E-11        |
| MAPK signaling pathway*                    | 2    | 21.5          | 258                  | 9                          | 3.5                     | 9.84E-09    | 9.84E-09  | 1.08E-08 | 1.08E-08        |
| Calcium signaling pathway*                 | 3    | 17.9          | 185                  | 7                          | 3.8                     | 1.71E-07    | 1.71E-07  | 3.10E-07 | 3.10E-07        |
| Axon guidance*                             | 4    | 17.0          | 128                  | 6                          | 4.7                     | 6.12E-07    | 6.12E-07  | 7.58E-07 | 7.58E-07        |
| Focal adhesion*                            | 5    | 15.8          | 192                  | 6                          | 3.1                     | 5.72E-06    | 5.72E-06  | 2.34E-06 | 2.34E-06        |
| Cytokine-cytokine receptor interaction*    | 6    | 12.1          | 242                  | 6                          | 2.5                     | 1.66E-05    | 1.66E-05  | 7.29E-05 | 7.29E-05        |
| Jak-STAT signaling pathway*                | 7    | 11.9          | 151                  | 5                          | 3.3                     | 2.06E-05    | 2.06E-05  | 9.04E-05 | 9.04E-05        |
| Long-term potentiation*                    | 8    | 11.2          | 66                   | 3                          | 4.5                     | 5.35E-04    | 5.35E-04  | 1.65E-04 | 1.65E-04        |
| Natural killer cell mediated cytotoxicity* | 9    | 10.4          | 127                  | 4                          | 3.2                     | 1.66E-04    | 1.66E-04  | 3.40E-04 | 3.40E-04        |
| Wnt signaling pathway*                     | 10   | 10.3          | 145                  | 4                          | 2.8                     | 4.18E-04    | 4.18E-04  | 3.71E-04 | 3.71E-04        |
| Renal cell carcinoma*                      | 11   | 8.7           | 69                   | 3                          | 4.3                     | 6.10E-04    | 6.10E-04  | 1.60E-03 | 1.60E-03        |
| Basal cell carcinoma*                      | 12   | 8.6           | 55                   | 1                          | 1.8                     | 1.26E-01    | 1.26E-01  | 1.74E-03 | 1.74E-03        |
| Type II diabetes mellitus*                 | 13   | 8.3           | 46                   | 1                          | 2.2                     | 1.04E-01    | 1.04E-01  | 2.32E-03 | 2.32E-03        |
| Toll-like receptor signaling pathway*      | 14   | 7.9           | 101                  | 3                          | 3.0                     | 1.61E-03    | 1.61E-03  | 3.33E-03 | 3.33E-03        |
| Melanoma*                                  | 15   | 7.8           | 71                   | 1                          | 1.4                     | 1.57E-01    | 1.57E-01  | 3.46E-03 | 3.46E-03        |
| Tight junction*                            | 16   | 7.7           | 135                  | 3                          | 2.2                     | 3.75E-03    | 3.75E-03  | 4.03E-03 | 4.03E-03        |
| Notch signaling pathway*                   | 17   | 7.2           | 47                   | 2                          | 4.3                     | 4.93E-03    | 4.93E-03  | 6.24E-03 | 6.24E-03        |
| Regulation of actin cytoskeleton*          | 18   | 6.7           | 206                  | 3                          | 1.5                     | 1.23E-02    | 1.23E-02  | 9.36E-03 | 9.36E-03        |
| ECM-receptor interaction*                  | 19   | 6.0           | 84                   | 2                          | 2.4                     | 1.63E-02    | 1.63E-02  | 1.79E-02 | 1.79E-02        |
| B cell receptor signaling pathway*         | 20   | 5.9           | 66                   | 2                          | 3.0                     | 1.13E-02    | 1.13E-02  | 1.88E-02 | 1.88E-02        |
| p53 signaling pathway*                     | 21   | 5.5           | 65                   | 2                          | 3.1                     | 1.03E-02    | 1.03E-02  | 2.67E-02 | 2.67E-02        |
| Gap junction*                              | 22   | 5.4           | 92                   | 2                          | 2.2                     | 1.87E-02    | 1.87E-02  | 2.85E-02 | 2.85E-02        |
| T cell receptor signaling pathway*         | 23   | 5.3           | 105                  | 2                          | 1.9                     | 2.16E-02    | 2.16E-02  | 3.25E-02 | 3.25E-02        |

|                                            |    |     |     |   |     |          |          |          |          |
|--------------------------------------------|----|-----|-----|---|-----|----------|----------|----------|----------|
| Cell Communication                         | 24 | 4.6 | 130 | 2 | 1.5 | 3.25E-02 | 3.25E-02 | 5.57E-02 | 5.57E-02 |
| Leukocyte transendothelial migration       | 25 | 4.5 | 115 | 2 | 1.7 | 2.90E-02 | 2.90E-02 | 5.97E-02 | 5.97E-02 |
| TGF-beta signaling pathway                 | 26 | 4.3 | 89  | 1 | 1.1 | 1.87E-01 | 1.87E-01 | 6.93E-02 | 6.93E-02 |
| Dentatorubropallidoluysian atrophy (DRPLA) | 27 | 4.2 | 15  | 1 | 6.7 | 3.59E-02 | 3.59E-02 | 7.54E-02 | 7.54E-02 |
| Melanogenesis                              | 28 | 4.1 | 98  | 1 | 1.0 | 2.13E-01 | 2.13E-01 | 8.77E-02 | 8.77E-02 |
| Alzheimer"s disease                        | 29 | 3.9 | 23  | 1 | 4.3 | 5.22E-02 | 5.22E-02 | 9.82E-02 | 9.82E-02 |
| VEGF signaling pathway                     | 30 | 3.8 | 72  | 1 | 1.4 | 1.61E-01 | 1.61E-01 | 1.10E-01 | 1.10E-01 |
| Taste transduction                         | 31 | 3.7 | 60  | 1 | 1.7 | 6.83E-02 | 6.83E-02 | 1.12E-01 | 1.12E-01 |
| Neurodegenerative Diseases                 | 32 | 3.6 | 29  | 1 | 3.4 | 6.83E-02 | 6.83E-02 | 1.21E-01 | 1.21E-01 |
| Colorectal cancer                          | 33 | 3.5 | 84  | 1 | 1.2 | 1.85E-01 | 1.85E-01 | 1.36E-01 | 1.36E-01 |
| Allograft rejection                        | 34 | 3.4 | 65  | 1 | 1.5 | 9.07E-02 | 9.07E-02 | 1.46E-01 | 1.46E-01 |
| Bladder cancer                             | 35 | 3.3 | 42  | 1 | 2.4 | 9.52E-02 | 9.52E-02 | 1.53E-01 | 1.53E-01 |
| Type I diabetes mellitus                   | 36 | 3.3 | 70  | 1 | 1.4 | 1.02E-01 | 1.02E-01 | 1.60E-01 | 1.60E-01 |
| Hedgehog signaling pathway                 | 37 | 3.2 | 53  | 1 | 1.9 | 1.19E-01 | 1.19E-01 | 1.69E-01 | 1.69E-01 |
| Apoptosis                                  | 38 | 3.2 | 81  | 1 | 1.2 | 1.79E-01 | 1.79E-01 | 1.75E-01 | 1.75E-01 |
| mTOR signaling pathway                     | 39 | 3.2 | 52  | 1 | 1.9 | 1.15E-01 | 1.15E-01 | 1.76E-01 | 1.76E-01 |
| Cell adhesion molecules (CAMs)             | 40 | 3.1 | 157 | 1 | 0.6 | 2.69E-01 | 2.69E-01 | 1.79E-01 | 1.79E-01 |
| Antigen processing and presentation        | 41 | 3.0 | 99  | 1 | 1.0 | 1.53E-01 | 1.53E-01 | 2.03E-01 | 2.03E-01 |
| Pancreatic cancer                          | 42 | 2.8 | 73  | 1 | 1.4 | 1.61E-01 | 1.61E-01 | 2.27E-01 | 2.27E-01 |
| Adipocytokine signaling pathway            | 43 | 2.8 | 71  | 1 | 1.4 | 1.57E-01 | 1.57E-01 | 2.40E-01 | 2.40E-01 |
| Long-term depression                       | 44 | 2.7 | 76  | 1 | 1.3 | 1.67E-01 | 1.67E-01 | 2.43E-01 | 2.43E-01 |
| Chronic myeloid leukemia                   | 45 | 2.7 | 77  | 1 | 1.3 | 1.67E-01 | 1.67E-01 | 2.51E-01 | 2.51E-01 |
| Hematopoietic cell lineage                 | 46 | 2.7 | 85  | 1 | 1.2 | 1.83E-01 | 1.83E-01 | 2.55E-01 | 2.55E-01 |
| ErbB signaling pathway                     | 47 | 2.6 | 87  | 1 | 1.1 | 1.87E-01 | 1.87E-01 | 2.71E-01 | 2.71E-01 |
| Glycan structures - biosynthesis 1         | 48 | 2.6 | 117 | 1 | 0.9 | 2.43E-01 | 2.43E-01 | 2.73E-01 | 2.73E-01 |
| GnRH signaling pathway                     | 49 | 2.5 | 95  | 1 | 1.1 | 2.05E-01 | 2.05E-01 | 2.89E-01 | 2.89E-01 |
| Cell cycle                                 | 50 | 2.4 | 109 | 1 | 0.9 | 2.32E-01 | 2.32E-01 | 3.16E-01 | 3.16E-01 |
| Ubiquitin mediated proteolysis             | 51 | 2.2 | 132 | 1 | 0.8 | 2.70E-01 | 2.70E-01 | 3.49E-01 | 3.49E-01 |

**Table 14** KEGG pathways of significantly enriched genes (Mouse  $Qkr^{fg/fg}$  adult dorsal cortex vs. wildtype [ $p < 0.05$ ; FC  $< -1.5$  or  $> 1.5$ ])

(\* significant corrected gamma p-value  $< 0.05$ , DAVID functional annotation)

| <b>KEGG pathway name</b>                  | <b>p-value</b> | <b>Fold enrichment</b> |
|-------------------------------------------|----------------|------------------------|
| Neuroactive ligand-receptor interaction*  | 4.45E-03       | 3.01                   |
| Axon guidance*                            | 2.12E-02       | 3.66                   |
| Calcium signaling pathway*                | 2.21E-02       | 3.10                   |
| MAPK signaling pathway*                   | 3.90E-02       | 2.44                   |
| Focal adhesion                            | 9.57E-02       | 2.41                   |
| Jak-STAT signaling pathway                | 1.27E-01       | 2.53                   |
| Long-term potentiation                    | 1.91E-01       | 3.66                   |
| Cytokine-cytokine receptor interaction    | 1.93E-01       | 1.91                   |
| Natural killer cell mediated cytotoxicity | 2.06E-01       | 2.50                   |
| Renal cell carcinoma                      | 2.15E-01       | 3.40                   |
| Wnt signaling pathway                     | 2.81E-01       | 2.12                   |
| Toll-like receptor signaling pathway      | 3.75E-01       | 2.26                   |
| Notch signaling pathway                   | 4.48E-01       | 3.35                   |
| Tight junction                            | 5.02E-01       | 1.76                   |
| B cell receptor signaling pathway         | 5.57E-01       | 2.44                   |
| p53 signaling pathway                     | 5.69E-01       | 2.37                   |
| ECM-receptor interaction                  | 6.63E-01       | 1.83                   |
| Gap junction                              | 6.89E-01       | 1.71                   |
| T cell receptor signaling pathway         | 7.05E-01       | 1.64                   |
| Regulation of actin cytoskeleton          | 7.50E-01       | 1.12                   |
| Leukocyte transendothelial migration      | 7.76E-01       | 1.34                   |
| Cell Communication                        | 8.19E-01       | 1.17                   |



**Table 15** KEGG pathways of significantly enriched genes (Mouse  $Qki^{fg/tgt}$  E12.5 dorsal telencephalon vs wildtype

[p &lt; 0.05; FC &lt; -1.5 or &gt;1.5] (\* significant corrected gamma p-value &lt; 0.05, Pathway Express calculation)

| KEGG pathway name                       | Rank | Impact factor | No. genes in pathway | No. input genes in pathway | % Pathwaygenes in input | p-value     |           |          |                 |
|-----------------------------------------|------|---------------|----------------------|----------------------------|-------------------------|-------------|-----------|----------|-----------------|
|                                         |      |               |                      |                            |                         | uncorrected | corrected | gamma    | corrected gamma |
| Phosphatidylinositol signaling system*  | 1    | 21.9          | 70                   | 2                          | 2.9                     | 3.06E-02    | 3.06E-02  | 6.92E-09 | 6.92E-09        |
| MAPK signaling pathway*                 | 2    | 21.7          | 258                  | 11                         | 4.3                     | 4.37E-09    | 4.37E-09  | 8.70E-09 | 8.70E-09        |
| Insulin signaling pathway*              | 3    | 21.0          | 137                  | 9                          | 6.6                     | 2.68E-09    | 2.68E-09  | 1.60E-08 | 1.60E-08        |
| Adherens junction*                      | 4    | 17.1          | 74                   | 4                          | 5.4                     | 1.92E-04    | 1.92E-04  | 6.77E-07 | 6.77E-07        |
| Melanogenesis*                          | 5    | 14.9          | 98                   | 6                          | 6.1                     | 2.34E-06    | 2.34E-06  | 5.35E-06 | 5.35E-06        |
| Type II diabetes mellitus*              | 6    | 13.7          | 46                   | 4                          | 8.7                     | 2.85E-05    | 2.85E-05  | 1.62E-05 | 1.62E-05        |
| Wnt signaling pathway*                  | 7    | 13.6          | 145                  | 6                          | 4.1                     | 2.15E-05    | 2.15E-05  | 1.77E-05 | 1.77E-05        |
| Focal adhesion*                         | 8    | 11.3          | 192                  | 6                          | 3.1                     | 8.70E-05    | 8.70E-05  | 1.59E-04 | 1.59E-04        |
| Long-term depression*                   | 9    | 11.1          | 76                   | 4                          | 5.3                     | 2.13E-04    | 2.13E-04  | 1.83E-04 | 1.83E-04        |
| Regulation of actin cytoskeleton*       | 10   | 10.6          | 206                  | 6                          | 2.9                     | 1.23E-04    | 1.23E-04  | 2.83E-04 | 2.83E-04        |
| Basal cell carcinoma*                   | 11   | 10.5          | 55                   | 3                          | 5.5                     | 1.30E-03    | 1.30E-03  | 3.13E-04 | 3.13E-04        |
| Long-term potentiation*                 | 12   | 10.0          | 66                   | 3                          | 4.5                     | 2.11E-03    | 2.11E-03  | 5.11E-04 | 5.11E-04        |
| Neurodegenerative Diseases*             | 13   | 9.9           | 29                   | 3                          | 10.3                    | 1.95E-04    | 1.95E-04  | 5.69E-04 | 5.69E-04        |
| Cytokine-cytokine receptor interaction* | 14   | 9.6           | 242                  | 6                          | 2.5                     | 2.41E-04    | 2.41E-04  | 7.30E-04 | 7.30E-04        |
| Calcium signaling pathway*              | 15   | 9.5           | 185                  | 5                          | 2.7                     | 5.28E-04    | 5.28E-04  | 8.12E-04 | 8.12E-04        |
| T cell receptor signaling pathway*      | 16   | 9.4           | 105                  | 4                          | 3.8                     | 4.85E-04    | 4.85E-04  | 8.57E-04 | 8.57E-04        |
| Tight junction*                         | 17   | 9.3           | 135                  | 4                          | 3.0                     | 1.60E-03    | 1.60E-03  | 9.28E-04 | 9.28E-04        |
| Base excision repair*                   | 18   | 9.2           | 36                   | 3                          | 8.3                     | 2.62E-04    | 2.62E-04  | 1.06E-03 | 1.06E-03        |
| ErbB signaling pathway*                 | 19   | 9.1           | 87                   | 4                          | 4.6                     | 3.44E-04    | 3.44E-04  | 1.10E-03 | 1.10E-03        |
| DNA replication*                        | 20   | 9.0           | 34                   | 3                          | 8.8                     | 3.15E-04    | 3.15E-04  | 1.23E-03 | 1.23E-03        |
| Melanoma*                               | 21   | 8.6           | 71                   | 3                          | 4.2                     | 2.60E-03    | 2.60E-03  | 1.82E-03 | 1.82E-03        |
| Cell cycle*                             | 22   | 8.2           | 109                  | 4                          | 3.7                     | 8.51E-04    | 8.51E-04  | 2.56E-03 | 2.56E-03        |
| Hedgehog signaling pathway*             | 23   | 7.8           | 53                   | 3                          | 5.7                     | 1.11E-03    | 1.11E-03  | 3.62E-03 | 3.62E-03        |

|                                             |    |     |     |   |     |          |          |          |          |
|---------------------------------------------|----|-----|-----|---|-----|----------|----------|----------|----------|
| TGF-beta signaling pathway*                 | 24 | 7.5 | 89  | 3 | 3.4 | 4.50E-03 | 4.50E-03 | 4.65E-03 | 4.65E-03 |
| GnRH signaling pathway*                     | 25 | 7.5 | 95  | 3 | 3.2 | 5.96E-03 | 5.96E-03 | 4.78E-03 | 4.78E-03 |
| Glycan structures - biosynthesis 2*         | 26 | 7.5 | 58  | 3 | 5.2 | 1.44E-03 | 1.44E-03 | 4.90E-03 | 4.90E-03 |
| Gap junction*                               | 27 | 7.4 | 92  | 2 | 2.2 | 4.46E-02 | 4.46E-02 | 4.99E-03 | 4.99E-03 |
| Apoptosis*                                  | 28 | 7.4 | 81  | 3 | 3.7 | 3.93E-03 | 3.93E-03 | 5.24E-03 | 5.24E-03 |
| Ubiquitin mediated proteolysis*             | 29 | 7.4 | 132 | 4 | 3.0 | 1.64E-03 | 1.64E-03 | 5.24E-03 | 5.24E-03 |
| Neuroactive ligand-receptor interaction*    | 30 | 7.2 | 256 | 5 | 2.0 | 1.93E-03 | 1.93E-03 | 5.88E-03 | 5.88E-03 |
| Prostate cancer*                            | 31 | 7.1 | 88  | 3 | 3.4 | 4.96E-03 | 4.96E-03 | 6.87E-03 | 6.87E-03 |
| ECM-receptor interaction*                   | 32 | 6.9 | 84  | 3 | 3.6 | 3.80E-03 | 3.80E-03 | 8.22E-03 | 8.22E-03 |
| Jak-STAT signaling pathway*                 | 33 | 6.5 | 151 | 3 | 2.0 | 1.65E-02 | 1.65E-02 | 1.12E-02 | 1.12E-02 |
| Hematopoietic cell lineage*                 | 34 | 6.5 | 85  | 3 | 3.5 | 4.21E-03 | 4.21E-03 | 1.18E-02 | 1.18E-02 |
| Natural killer cell mediated cytotoxicity*  | 35 | 6.3 | 127 | 3 | 2.4 | 9.88E-03 | 9.88E-03 | 1.29E-02 | 1.29E-02 |
| Homologous recombination*                   | 36 | 6.3 | 26  | 2 | 7.7 | 4.61E-03 | 4.61E-03 | 1.33E-02 | 1.33E-02 |
| Taste transduction*                         | 37 | 6.2 | 60  | 2 | 3.3 | 5.71E-03 | 5.71E-03 | 1.41E-02 | 1.41E-02 |
| Huntington"s disease*                       | 38 | 6.2 | 28  | 2 | 7.1 | 5.33E-03 | 5.33E-03 | 1.46E-02 | 1.46E-02 |
| Renal cell carcinoma*                       | 39 | 6.0 | 69  | 2 | 2.9 | 2.91E-02 | 2.91E-02 | 1.74E-02 | 1.74E-02 |
| VEGF signaling pathway*                     | 40 | 5.7 | 72  | 2 | 2.8 | 3.23E-02 | 3.23E-02 | 2.20E-02 | 2.20E-02 |
| Glioma*                                     | 41 | 5.7 | 65  | 2 | 3.1 | 2.52E-02 | 2.52E-02 | 2.32E-02 | 2.32E-02 |
| Cell adhesion molecules (CAMs)*             | 42 | 5.6 | 157 | 3 | 1.9 | 1.38E-02 | 1.38E-02 | 2.42E-02 | 2.42E-02 |
| Dentatorubropallidoluysian atrophy (DRPLA)* | 43 | 5.5 | 15  | 1 | 6.7 | 5.70E-02 | 5.70E-02 | 2.58E-02 | 2.58E-02 |
| Nucleotide excision repair*                 | 44 | 5.4 | 41  | 2 | 4.9 | 1.12E-02 | 1.12E-02 | 2.94E-02 | 2.94E-02 |
| Acute myeloid leukemia*                     | 45 | 5.3 | 58  | 2 | 3.4 | 2.09E-02 | 2.09E-02 | 3.14E-02 | 3.14E-02 |
| Notch signaling pathway                     | 46 | 4.7 | 47  | 1 | 2.1 | 1.55E-01 | 1.55E-01 | 5.30E-02 | 5.30E-02 |
| Axon guidance                               | 47 | 4.7 | 128 | 2 | 1.6 | 8.70E-02 | 8.70E-02 | 5.39E-02 | 5.39E-02 |
| B cell receptor signaling pathway           | 48 | 4.6 | 66  | 2 | 3.0 | 2.75E-02 | 2.75E-02 | 5.72E-02 | 5.72E-02 |
| Antigen processing and presentation         | 49 | 4.4 | 99  | 2 | 2.0 | 2.91E-02 | 2.91E-02 | 6.42E-02 | 6.42E-02 |
| Chronic myeloid leukemia                    | 50 | 4.3 | 77  | 2 | 2.6 | 3.48E-02 | 3.48E-02 | 7.12E-02 | 7.12E-02 |
| Toll-like receptor signaling pathway        | 51 | 4.3 | 101 | 2 | 2.0 | 5.32E-02 | 5.32E-02 | 7.31E-02 | 7.31E-02 |

|                                      |    |     |     |   |     |          |          |          |          |
|--------------------------------------|----|-----|-----|---|-----|----------|----------|----------|----------|
| Fc epsilon RI signaling pathway      | 52 | 4.3 | 78  | 2 | 2.6 | 3.74E-02 | 3.74E-02 | 7.42E-02 | 7.42E-02 |
| Colorectal cancer                    | 53 | 4.1 | 84  | 2 | 2.4 | 4.27E-02 | 4.27E-02 | 8.19E-02 | 8.19E-02 |
| Leukocyte transendothelial migration | 54 | 4.1 | 115 | 2 | 1.7 | 6.78E-02 | 6.78E-02 | 8.23E-02 | 8.23E-02 |
| Complement and coagulation cascades  | 55 | 4.1 | 71  | 1 | 1.4 | 2.28E-01 | 2.28E-01 | 8.36E-02 | 8.36E-02 |
| Non-small cell lung cancer           | 56 | 4.0 | 54  | 1 | 1.9 | 1.87E-01 | 1.87E-01 | 8.81E-02 | 8.81E-02 |
| Ribosome                             | 57 | 4.0 | 92  | 2 | 2.2 | 4.46E-02 | 4.46E-02 | 9.10E-02 | 9.10E-02 |
| Parkinson's disease                  | 58 | 3.7 | 21  | 1 | 4.8 | 7.53E-02 | 7.53E-02 | 1.17E-01 | 1.17E-01 |
| Glycan structures - biosynthesis 1   | 59 | 3.6 | 117 | 2 | 1.7 | 7.33E-02 | 7.33E-02 | 1.28E-01 | 1.28E-01 |
| Mismatch repair                      | 60 | 3.5 | 20  | 1 | 5.0 | 7.53E-02 | 7.53E-02 | 1.39E-01 | 1.39E-01 |
| mTOR signaling pathway               | 61 | 3.4 | 52  | 1 | 1.9 | 1.78E-01 | 1.78E-01 | 1.43E-01 | 1.43E-01 |
| Dorso-ventral axis formation         | 62 | 3.2 | 26  | 1 | 3.8 | 9.68E-02 | 9.68E-02 | 1.70E-01 | 1.70E-01 |
| Proteasome                           | 63 | 3.1 | 31  | 1 | 3.2 | 1.14E-01 | 1.14E-01 | 1.87E-01 | 1.87E-01 |
| ABC transporters                     | 64 | 2.9 | 41  | 1 | 2.4 | 1.48E-01 | 1.48E-01 | 2.11E-01 | 2.11E-01 |
| p53 signaling pathway                | 65 | 2.9 | 65  | 1 | 1.5 | 2.19E-01 | 2.19E-01 | 2.19E-01 | 2.19E-01 |
| Adipocytokine signaling pathway      | 66 | 2.3 | 71  | 1 | 1.4 | 2.40E-01 | 2.40E-01 | 3.21E-01 | 3.21E-01 |
| Cell Communication                   | 67 | 2.0 | 130 | 1 | 0.8 | 3.66E-01 | 3.66E-01 | 4.15E-01 | 4.15E-01 |

**Table 16** KEGG pathways of significantly enriched genes (Mouse  $Qk1^{fg/gt}$  E12.5 dorsal telencephalon vs wildtype

[ $p < 0.05$ ; FC  $< -1.5$  or  $> 1.5$ ] (\* significant corrected gamma p-value  $< 0.05$ , DAVID functional annotation)

| <b>KEGG pathway name</b>      | <b>p-value</b> | <b>Fold enrichment</b> |
|-------------------------------|----------------|------------------------|
| MAPK signaling pathway*       | 3.15E-04       | 1.77                   |
| Insulin signaling pathway*    | 2.18E-03       | 1.94                   |
| Type II diabetes mellitus*    | 7.64E-03       | 2.59                   |
| Pancreatic cancer*            | 1.43E-02       | 2.08                   |
| Glycolysis / Gluconeogenesis* | 1.81E-02       | 2.29                   |
| Colorectal cancer*            | 1.96E-02       | 1.94                   |

|                                      |          |      |
|--------------------------------------|----------|------|
| Wnt signaling pathway*               | 2.28E-02 | 1.65 |
| Acute myeloid leukemia*              | 3.27E-02 | 2.09 |
| Fc epsilon RI signaling pathway*     | 3.91E-02 | 1.88 |
| Cell cycle*                          | 3.91E-02 | 1.69 |
| GnRH signaling pathway*              | 3.97E-02 | 1.77 |
| Glutamate metabolism                 | 5.18E-02 | 2.53 |
| Carbon fixation                      | 5.39E-02 | 2.83 |
| Pentose phosphate pathway            | 7.32E-02 | 2.60 |
| Toll-like receptor signaling pathway | 8.15E-02 | 1.60 |
| Chronic myeloid leukemia             | 8.53E-02 | 1.71 |
| Endometrial cancer                   | 9.14E-02 | 1.91 |
| Cyanoamino acid metabolism           | 9.86E-02 | 5.42 |
| Prostate cancer                      | 9.90E-02 | 1.62 |

**Table 17** Chromatin immunoprecipitation statistics

| MAT score<br>p-value cutoff | No. of<br>regions | MAT score<br>range | Average region |              | No. of genes<br>in regions | No. of Genes with ANOVA expression p-value <.05 |               |             |                         |
|-----------------------------|-------------------|--------------------|----------------|--------------|----------------------------|-------------------------------------------------|---------------|-------------|-------------------------|
|                             |                   |                    | p-value        | length (bps) |                            | total                                           | downregulated | upregulated | Ratio down/up-regulated |
| 0.1                         | 8222              | 8.6 - 98.6         | 2.64E-02       | 1008         | 4257                       | 466                                             | 386           | 80          | 4.8                     |
| 0.05                        | 9003              | 8.6 - 98.6         | 2.80E-02       | 783          | 4540                       | 467                                             | 378           | 89          | 4.3                     |
| 0.01                        | 1366              | 13.1 - 98.6        | 4.59E-03       | 863          | 689                        | 67                                              | 56            | 11          | 5.1                     |
| 0.0001                      | 169               | 27.0 - 98.6        | 2.26E-05       | 1230         | 58                         | 5                                               | 4             | 1           | 4.0                     |

**Table 18** KEGG pathways of enriched genes with CHIP-on-CHIP bindings sites

(\* significant corrected gamma p-value &lt; 0.05, Pathway Express calculation)

| KEGG pathway name                      | Rank | Impact factor | No. genes in pathway | % Pathwaygenes in input | p-value     |           |          |                 |
|----------------------------------------|------|---------------|----------------------|-------------------------|-------------|-----------|----------|-----------------|
|                                        |      |               |                      |                         | uncorrected | corrected | gamma    | corrected gamma |
| Phosphatidylinositol signaling system* | 1    | 37.6          | 77                   | 2.6                     | 4.16E-01    | 4.16E-01  | 1.75E-15 | 1.75E-15        |
| Circadian rhythm*                      | 2    | 27.2          | 13                   | 7.7                     | 2.15E-01    | 2.15E-01  | 4.18E-11 | 4.18E-11        |
| Gap junction*                          | 3    | 6.6           | 96                   | 2.1                     | 5.19E-01    | 5.19E-01  | 1.00E-02 | 1.00E-02        |
| Basal cell carcinoma*                  | 4    | 6.4           | 55                   | 5.5                     | 7.72E-02    | 7.72E-02  | 1.23E-02 | 1.23E-02        |
| Thyroid cancer*                        | 5    | 6.1           | 29                   | 6.9                     | 9.91E-02    | 9.91E-02  | 1.62E-02 | 1.62E-02        |
| mTOR signaling pathway*                | 6    | 5.6           | 51                   | 7.8                     | 1.25E-02    | 1.25E-02  | 2.46E-02 | 2.46E-02        |
| MAPK signaling pathway*                | 7    | 5.5           | 265                  | 3.0                     | 1.14E-01    | 1.14E-01  | 2.69E-02 | 2.69E-02        |
| Regulation of actin cytoskeleton*      | 8    | 5.1           | 211                  | 1.9                     | 5.27E-01    | 5.27E-01  | 3.80E-02 | 3.80E-02        |
| Long-term depression*                  | 9    | 5.1           | 76                   | 1.3                     | 7.57E-01    | 7.57E-01  | 3.85E-02 | 3.85E-02        |
| Focal adhesion*                        | 10   | 5.0           | 199                  | 3.0                     | 1.57E-01    | 1.57E-01  | 4.13E-02 | 4.13E-02        |
| Small cell lung cancer                 | 11   | 4.4           | 87                   | 4.6                     | 7.68E-02    | 7.68E-02  | 6.38E-02 | 6.38E-02        |
| Long-term potentiation                 | 12   | 4.3           | 69                   | 1.4                     | 7.23E-01    | 7.23E-01  | 6.93E-02 | 6.93E-02        |
| Apoptosis                              | 13   | 4.3           | 84                   | 3.6                     | 2.01E-01    | 2.01E-01  | 7.42E-02 | 7.42E-02        |
| GnRH signaling pathway                 | 14   | 4.1           | 97                   | 4.1                     | 1.04E-01    | 1.04E-01  | 8.26E-02 | 8.26E-02        |
| Wnt signaling pathway                  | 15   | 4.1           | 148                  | 2.7                     | 2.82E-01    | 2.82E-01  | 8.65E-02 | 8.65E-02        |
| Pancreatic cancer                      | 16   | 3.8           | 73                   | 4.1                     | 1.51E-01    | 1.51E-01  | 1.05E-01 | 1.05E-01        |
| T cell receptor signaling pathway      | 17   | 3.8           | 93                   | 1.1                     | 8.23E-01    | 8.23E-01  | 1.06E-01 | 1.06E-01        |
| Complement and coagulation cascades    | 18   | 3.7           | 69                   | 1.4                     | 7.23E-01    | 7.23E-01  | 1.13E-01 | 1.13E-01        |
| Hedgehog signaling pathway             | 19   | 3.7           | 57                   | 5.3                     | 8.06E-02    | 8.06E-02  | 1.19E-01 | 1.19E-01        |
| Maturity onset diabetes of the young   | 20   | 3.4           | 25                   | 4.0                     | 3.36E-01    | 3.36E-01  | 1.49E-01 | 1.49E-01        |
| Homologous recombination               | 21   | 3.4           | 27                   | 7.4                     | 8.77E-02    | 8.77E-02  | 1.51E-01 | 1.51E-01        |
| Dentatorubropallidolusian atrophy      | 22   | 3.3           | 15                   | 6.7                     | 2.29E-01    | 2.29E-01  | 1.63E-01 | 1.63E-01        |

(DRPLA)

|                                                            |    |     |     |     |          |          |          |          |
|------------------------------------------------------------|----|-----|-----|-----|----------|----------|----------|----------|
| Calcium signaling pathway                                  | 23 | 3.2 | 175 | 1.1 | 8.33E-01 | 8.33E-01 | 1.67E-01 | 1.67E-01 |
| Axon guidance                                              | 24 | 3.2 | 128 | 1.6 | 6.86E-01 | 6.86E-01 | 1.71E-01 | 1.71E-01 |
| Toll-like receptor signaling pathway                       | 25 | 3.2 | 102 | 2.0 | 5.63E-01 | 5.63E-01 | 1.76E-01 | 1.76E-01 |
| Antigen processing and presentation                        | 26 | 3.0 | 88  | 2.3 | 4.22E-01 | 4.22E-01 | 2.01E-01 | 2.01E-01 |
| Base excision repair                                       | 27 | 3.0 | 33  | 6.1 | 1.23E-01 | 1.23E-01 | 2.05E-01 | 2.05E-01 |
| Chronic myeloid leukemia                                   | 28 | 2.9 | 76  | 2.6 | 4.09E-01 | 4.09E-01 | 2.11E-01 | 2.11E-01 |
| Alzheimer"s disease                                        | 29 | 2.9 | 22  | 4.5 | 3.36E-01 | 3.36E-01 | 2.18E-01 | 2.18E-01 |
| Insulin signaling pathway                                  | 30 | 2.8 | 138 | 2.9 | 2.42E-01 | 2.42E-01 | 2.27E-01 | 2.27E-01 |
| Endometrial cancer                                         | 31 | 2.7 | 52  | 3.8 | 2.48E-01 | 2.48E-01 | 2.40E-01 | 2.40E-01 |
| Melanoma                                                   | 32 | 2.7 | 71  | 1.4 | 7.33E-01 | 7.33E-01 | 2.44E-01 | 2.44E-01 |
| Acute myeloid leukemia                                     | 33 | 2.7 | 57  | 1.8 | 6.54E-01 | 6.54E-01 | 2.45E-01 | 2.45E-01 |
| Neurodegenerative Diseases                                 | 34 | 2.6 | 30  | 3.3 | 4.27E-01 | 4.27E-01 | 2.60E-01 | 2.60E-01 |
| Colorectal cancer                                          | 35 | 2.6 | 84  | 3.6 | 2.01E-01 | 2.01E-01 | 2.62E-01 | 2.62E-01 |
| Taste transduction                                         | 36 | 2.6 | 53  | 1.9 | 5.75E-01 | 5.75E-01 | 2.76E-01 | 2.76E-01 |
| Fc epsilon RI signaling pathway                            | 37 | 2.5 | 77  | 2.6 | 4.09E-01 | 4.09E-01 | 2.80E-01 | 2.80E-01 |
| ECM-receptor interaction                                   | 38 | 2.4 | 87  | 2.3 | 4.72E-01 | 4.72E-01 | 2.99E-01 | 2.99E-01 |
| p53 signaling pathway                                      | 39 | 2.4 | 68  | 2.9 | 3.57E-01 | 3.57E-01 | 3.02E-01 | 3.02E-01 |
| Melanogenesis                                              | 40 | 2.4 | 101 | 2.0 | 5.52E-01 | 5.52E-01 | 3.17E-01 | 3.17E-01 |
| Tight junction                                             | 41 | 2.3 | 135 | 2.2 | 4.49E-01 | 4.49E-01 | 3.22E-01 | 3.22E-01 |
| Non-small cell lung cancer                                 | 42 | 2.3 | 54  | 1.9 | 6.34E-01 | 6.34E-01 | 3.39E-01 | 3.39E-01 |
| Prostate cancer                                            | 43 | 2.2 | 89  | 1.1 | 8.06E-01 | 8.06E-01 | 3.50E-01 | 3.50E-01 |
| Epithelial cell signaling in Helicobacter pylori infection | 44 | 2.2 | 69  | 1.4 | 7.23E-01 | 7.23E-01 | 3.60E-01 | 3.60E-01 |
| B cell receptor signaling pathway                          | 45 | 2.2 | 64  | 1.6 | 6.96E-01 | 6.96E-01 | 3.61E-01 | 3.61E-01 |
| Glioma                                                     | 46 | 2.2 | 64  | 1.6 | 6.96E-01 | 6.96E-01 | 3.61E-01 | 3.61E-01 |
| Vibrio cholerae infection                                  | 47 | 2.2 | 59  | 1.7 | 6.66E-01 | 6.66E-01 | 3.65E-01 | 3.65E-01 |
| VEGF signaling pathway                                     | 48 | 2.1 | 71  | 1.4 | 7.28E-01 | 7.28E-01 | 3.72E-01 | 3.72E-01 |
| ErbB signaling pathway                                     | 49 | 2.1 | 87  | 2.3 | 4.78E-01 | 4.78E-01 | 3.73E-01 | 3.73E-01 |
| TGF-beta signaling pathway                                 | 50 | 2.1 | 89  | 2.2 | 4.78E-01 | 4.78E-01 | 3.78E-01 | 3.78E-01 |
| Renal cell carcinoma                                       | 51 | 2.1 | 69  | 2.9 | 3.64E-01 | 3.64E-01 | 3.86E-01 | 3.86E-01 |

|                                         |    |     |     |     |          |          |          |          |
|-----------------------------------------|----|-----|-----|-----|----------|----------|----------|----------|
| Cell Communication                      | 52 | 2.0 | 138 | 2.2 | 4.34E-01 | 4.34E-01 | 3.95E-01 | 3.95E-01 |
| Glycan structures - biosynthesis 1      | 53 | 2.0 | 122 | 2.5 | 3.90E-01 | 3.90E-01 | 3.96E-01 | 3.96E-01 |
| Cell cycle                              | 54 | 2.0 | 112 | 2.7 | 3.40E-01 | 3.40E-01 | 4.00E-01 | 4.00E-01 |
| Mismatch repair                         | 55 | 2.0 | 22  | 4.5 | 3.36E-01 | 3.36E-01 | 4.08E-01 | 4.08E-01 |
| Ubiquitin mediated proteolysis          | 56 | 1.9 | 130 | 2.3 | 4.20E-01 | 4.20E-01 | 4.33E-01 | 4.33E-01 |
| Regulation of autophagy                 | 57 | 1.8 | 30  | 3.3 | 4.06E-01 | 4.06E-01 | 4.50E-01 | 4.50E-01 |
| Huntington"s disease                    | 58 | 1.8 | 30  | 3.3 | 4.27E-01 | 4.27E-01 | 4.69E-01 | 4.69E-01 |
| Cell adhesion molecules (CAMs)          | 59 | 1.7 | 133 | 0.8 | 9.06E-01 | 9.06E-01 | 4.83E-01 | 4.83E-01 |
| Notch signaling pathway                 | 60 | 1.7 | 46  | 2.2 | 5.75E-01 | 5.75E-01 | 4.90E-01 | 4.90E-01 |
| Glycan structures - degradation         | 61 | 1.7 | 30  | 3.3 | 4.27E-01 | 4.27E-01 | 4.96E-01 | 4.96E-01 |
| ABC transporters                        | 62 | 1.7 | 44  | 2.3 | 5.50E-01 | 5.50E-01 | 5.04E-01 | 5.04E-01 |
| Basal transcription factors             | 63 | 1.7 | 34  | 2.9 | 4.38E-01 | 4.38E-01 | 5.04E-01 | 5.04E-01 |
| DNA replication                         | 64 | 1.6 | 35  | 2.9 | 4.78E-01 | 4.78E-01 | 5.12E-01 | 5.12E-01 |
| Olfactory transduction                  | 65 | 1.6 | 383 | 0.3 | 8.80E-01 | 8.80E-01 | 5.15E-01 | 5.15E-01 |
| Bladder cancer                          | 66 | 1.5 | 42  | 2.4 | 5.42E-01 | 5.42E-01 | 5.47E-01 | 5.47E-01 |
| Nucleotide excision repair              | 67 | 1.5 | 43  | 2.3 | 5.42E-01 | 5.42E-01 | 5.53E-01 | 5.53E-01 |
| Adipocytokine signaling pathway         | 68 | 1.5 | 72  | 1.4 | 7.38E-01 | 7.38E-01 | 5.54E-01 | 5.54E-01 |
| Cytokine-cytokine receptor interaction  | 69 | 1.4 | 259 | 0.8 | 9.51E-01 | 9.51E-01 | 5.82E-01 | 5.82E-01 |
| Jak-STAT signaling pathway              | 70 | 1.3 | 153 | 0.7 | 9.42E-01 | 9.42E-01 | 6.39E-01 | 6.39E-01 |
| Adherens junction                       | 71 | 1.2 | 75  | 1.3 | 7.52E-01 | 7.52E-01 | 6.70E-01 | 6.70E-01 |
| Neuroactive ligand-receptor interaction | 72 | 0.9 | 254 | 0.4 | 9.91E-01 | 9.91E-01 | 7.84E-01 | 7.84E-01 |

**Table 19** KEGG pathways of enriched genes with CHIP-on-CHIP bindings sites

(\* significant corrected gamma p-value &lt; 0.05, DAVID functional annotation)

| <b>KEGG pathway name</b>              | <b>p-value</b> | <b>Fold enrichment</b> |
|---------------------------------------|----------------|------------------------|
| Thyroid cancer*                       | 4.21E-03       | 11.78                  |
| MAPK signaling pathway*               | 3.81E-02       | 2.46                   |
| GnRH signaling pathway                | 1.09E-01       | 3.38                   |
| mTOR signaling pathway                | 1.30E-01       | 4.68                   |
| Basal cell carcinoma                  | 1.51E-01       | 4.26                   |
| Hedgehog signaling pathway            | 1.56E-01       | 4.18                   |
| Focal adhesion                        | 2.29E-01       | 2.00                   |
| Apoptosis                             | 2.78E-01       | 2.84                   |
| Wnt signaling pathway                 | 2.85E-01       | 2.11                   |
| Small cell lung cancer                | 2.92E-01       | 2.74                   |
| Cell cycle                            | 4.13E-01       | 2.09                   |
| Ubiquitin mediated proteolysis        | 4.85E-01       | 1.82                   |
| Insulin signaling pathway             | 4.97E-01       | 1.78                   |
| Regulation of actin cytoskeleton      | 4.97E-01       | 1.49                   |
| Cell Communication                    | 5.05E-01       | 1.75                   |
| p53 signaling pathway                 | 5.73E-01       | 2.34                   |
| Pancreatic cancer                     | 5.99E-01       | 2.18                   |
| Phosphatidylinositol signaling system | 6.14E-01       | 2.09                   |
| Antigen processing and presentation   | 6.33E-01       | 1.99                   |
| Colorectal cancer                     | 6.56E-01       | 1.87                   |
| ECM-receptor interaction              | 6.69E-01       | 1.81                   |
| TGF-beta signaling pathway            | 6.77E-01       | 1.77                   |
| Gap junction                          | 6.97E-01       | 1.67                   |
| Melanogenesis                         | 7.08E-01       | 1.62                   |
| Glycan structures - biosynthesis 1    | 7.79E-01       | 1.33                   |
| Tight junction                        | 8.11E-01       | 1.20                   |



|                                        |          |      |
|----------------------------------------|----------|------|
| Axon guidance                          | 8.11E-01 | 1.20 |
| Calcium signaling pathway              | 8.90E-01 | 0.91 |
| Cytokine-cytokine receptor interaction | 9.62E-01 | 0.62 |

**Table 20** Genes with significant ChIP-on-CHIP bindings sites (MAT score p-value < 0.05) and significant siRNA expression values (p-value < 0.05)

| Gene symbol | Gene Name                                               | ChIP-on-CHIP enriched region |             |                  |          | Expression |             |          |
|-------------|---------------------------------------------------------|------------------------------|-------------|------------------|----------|------------|-------------|----------|
|             |                                                         | Chromosome region            | Length(bps) | Probes in region | p-value  | MAT-score  | Fold change | p-value  |
| ---         | ---                                                     | chr19:63521299-63522196      | 898         | 20               | 2.72E-02 | 10.24      | -1.43       | 5.48E-04 |
| ---         | Transcribed locus                                       | chr9:3479548-3480181         | 634         | 18               | 4.59E-02 | 8.82       | 1.33        | 2.29E-03 |
| ---         | Transcribed locus                                       | chr16:28864493-28864984      | 492         | 15               | 1.17E-02 | 12.60      | -2.21       | 1.05E-02 |
| ---         | Homo sapiens, clone IMAGE:5479947, mRNA                 | chr8:145085116-145085724     | 609         | 17               | 2.58E-02 | 10.38      | -1.11       | 1.43E-02 |
| ---         | CDNA clone IMAGE:4332981                                | chr12:47603351-47604092      | 742         | 21               | 2.60E-02 | 10.37      | -1.23       | 3.96E-02 |
| ---         | Transcribed locus                                       | chr2:112529429-112530022     | 594         | 17               | 4.91E-02 | 8.65       | 1.42        | 4.06E-02 |
| ABCB8       | ATP-binding cassette, sub-family B (MDR/TAP), member 8  | chr7:150376929-150377531     | 603         | 18               | 4.00E-02 | 9.21       | -1.38       | 4.88E-02 |
| ABCC5       | ATP-binding cassette, sub-family C (CFTR/MRP), member 5 | chr3:185212808-185213413     | 606         | 13               | 4.75E-02 | 8.74       | -1.47       | 8.75E-03 |
| ABCF1       | ATP-binding cassette, sub-family F (GCN20), member 1    | chr6:30647281-30647924       | 644         | 18               | 4.24E-02 | 9.04       | -1.20       | 1.73E-02 |
| ACTR3       | ARP3 actin-related protein 3 homolog (yeast)            | chr2:114362478-114362934     | 457         | 14               | 2.61E-02 | 10.35      | 1.14        | 3.68E-03 |
| AES         | amino-terminal enhancer of split                        | chr19:3009424-3010085        | 662         | 14               | 1.41E-02 | 12.10      | -1.20       | 2.11E-02 |
| AKAP10      | A kinase (PRKA) anchor protein 10                       | chr17:19821926-19822573      | 648         | 18               | 2.79E-02 | 10.18      | 1.12        | 4.73E-02 |
| AKT2        | v-akt murine thymoma viral oncogene homolog 2           | chr19:45477316-45477991      | 676         | 17               | 3.55E-02 | 9.50       | -1.66       | 6.57E-03 |
| ALAS1       | aminolevulinatase, delta-, synthase 1                   | chr3:52204906-52205313       | 408         | 12               | 4.10E-02 | 9.13       | 1.20        | 6.60E-03 |
| ALDH3B1     | aldehyde dehydrogenase 3 family, member B1              | chr11:67530404-67531257      | 854         | 22               | 1.78E-02 | 11.47      | -1.71       | 1.61E-02 |
| ALDH9A1     | aldehyde dehydrogenase 9 family, member A1              | chr1:163936862-163937734     | 873         | 21               | 9.00E-03 | 13.44      | -1.27       | 2.18E-03 |
| ALOX12B     | arachidonate 12-lipoxygenase, 12R type                  | chr17:7933112-7933835        | 724         | 21               | 2.54E-02 | 10.44      | -1.18       | 3.26E-02 |

|           |                                                              |                           |      |    |          |       |       |          |
|-----------|--------------------------------------------------------------|---------------------------|------|----|----------|-------|-------|----------|
| ALPK1     | alpha-kinase 1                                               | chr4:113513483-113514005  | 523  | 15 | 1.61E-02 | 11.73 | 1.13  | 1.72E-02 |
| AMACR     | alpha-methylacyl-CoA racemase                                | chr5:34020360-34022353    | 1994 | 56 | 5.27E-05 | 29.56 | -1.36 | 1.84E-02 |
| AMH       | anti-Mullerian hormone                                       | chr19:2192702-2193213     | 512  | 14 | 3.98E-02 | 9.21  | -1.26 | 2.78E-02 |
| ANG       | angiogenin, ribonuclease, RNase A family, 5                  | chr14:20228545-20229508   | 964  | 24 | 3.06E-03 | 16.68 | 1.28  | 3.44E-02 |
| ANK1      | ankyrin 1, erythrocytic                                      | chr8:41647698-41649099    | 1402 | 40 | 8.79E-06 | 41.12 | -1.16 | 2.94E-02 |
| AP2A2     | adaptor-related protein complex 2, alpha 2 subunit           | chr11:915038-915635       | 598  | 17 | 4.96E-02 | 8.62  | -1.21 | 4.18E-02 |
| AP2B1     | adaptor-related protein complex 2, beta 1 subunit            | chr17:31085753-31086520   | 768  | 21 | 3.38E-02 | 9.64  | -1.20 | 4.32E-02 |
| APOL6     | apolipoprotein L, 6                                          | chr22:34371577-34371986   | 410  | 12 | 4.18E-02 | 9.07  | -1.14 | 3.78E-02 |
| ARMCX3    | armadillo repeat containing, X-linked 3                      | chrX:100763565-100764333  | 769  | 20 | 2.07E-02 | 11.03 | 1.24  | 1.18E-02 |
| ARMCX5    | armadillo repeat containing, X-linked 5                      | chrX:101742631-101743333  | 703  | 20 | 3.78E-02 | 9.35  | -1.29 | 1.63E-02 |
| ARMCX6    | armadillo repeat containing, X-linked 6                      | chrX:100763565-100764333  | 769  | 20 | 2.07E-02 | 11.03 | 1.16  | 4.26E-02 |
| ARS2      | arsenate resistance protein 2                                | chr7:100321185-100321782  | 598  | 16 | 4.88E-02 | 8.66  | -1.17 | 4.46E-02 |
| ASPH      | aspartate beta-hydroxylase                                   | chr8:62768744-62769635    | 892  | 25 | 4.25E-02 | 9.03  | 1.76  | 7.76E-03 |
| ATP5SL    | ATP5S-like                                                   | chr19:46640298-46640900   | 603  | 17 | 4.42E-02 | 8.93  | -1.19 | 1.24E-02 |
| ATXN3     | ataxin 3                                                     | chr14:91046325-91046944   | 620  | 14 | 3.80E-02 | 9.33  | 1.30  | 1.21E-02 |
| BATF2     | basic leucine zipper transcription factor, ATF-like 2        | chr11:64526945-64527591   | 647  | 14 | 3.62E-02 | 9.45  | -1.17 | 2.15E-03 |
| BBS1      | Bardet-Biedl syndrome 1                                      | chr11:66001170-66002216   | 1047 | 23 | 3.67E-02 | 9.42  | -1.65 | 1.32E-02 |
| BCL7B     | B-cell CLL/lymphoma 7B                                       | chr7:72609968-72610430    | 463  | 13 | 2.57E-02 | 10.40 | -1.23 | 3.96E-02 |
| BCR       | breakpoint cluster region                                    | chr22:21314999-21316082   | 1084 | 30 | 5.68E-03 | 14.82 | -1.89 | 7.89E-03 |
| BIRC2     | baculoviral IAP repeat-containing 2                          | chr11:101713286-101714107 | 822  | 21 | 2.61E-02 | 10.35 | -1.39 | 9.73E-03 |
| BOLA2     | PI-3-kinase-related kinase SMG-1 pseudogene                  | chr16:30010897-30011606   | 710  | 21 | 2.57E-02 | 10.40 | -1.39 | 1.97E-03 |
| BRWD1     | bromodomain and WD repeat domain containing 1                | chr21:39476423-39477062   | 640  | 19 | 4.02E-02 | 9.19  | 1.42  | 5.20E-03 |
| BUB3      | BUB3 budding uninhibited by benzimidazoles 3 homolog (yeast) | chr10:124890732-124891580 | 849  | 24 | 1.55E-02 | 11.83 | -1.20 | 4.74E-02 |
| C11orf59  | chromosome 11 open reading frame 59                          | chr11:71496038-71496774   | 737  | 20 | 3.31E-02 | 9.71  | -1.97 | 2.20E-04 |
| C12orf44  | chromosome 12 open reading frame 44                          | chr12:50746915-50747244   | 330  | 10 | 4.08E-02 | 9.14  | -1.80 | 8.84E-05 |
| C14orf179 | chromosome 14 open reading frame 179                         | chr14:75517201-75517968   | 768  | 21 | 3.47E-02 | 9.56  | -1.26 | 6.76E-03 |
| C14orf45  | chromosome 14 open reading frame 45                          | chr14:73620058-73620795   | 738  | 20 | 2.40E-02 | 10.59 | -1.48 | 1.88E-03 |

|          |                                                             |                          |      |    |          |       |       |          |
|----------|-------------------------------------------------------------|--------------------------|------|----|----------|-------|-------|----------|
| C16orf13 | chromosome 16 open reading frame 13                         | chr16:630613-631244      | 632  | 19 | 3.97E-02 | 9.22  | -1.10 | 3.01E-02 |
| C16orf14 | chromosome 16 open reading frame 14                         | chr16:630613-631244      | 632  | 19 | 3.97E-02 | 9.22  | -1.26 | 3.37E-02 |
| C17orf49 | chromosome 17 open reading frame 49                         | chr17:6866071-6866773    | 703  | 20 | 2.15E-02 | 10.91 | -1.24 | 1.82E-02 |
| C17orf56 | chromosome 17 open reading frame 56                         | chr17:76816170-76816794  | 625  | 11 | 6.38E-03 | 14.52 | -1.26 | 1.80E-02 |
| C17orf62 | chromosome 17 open reading frame 62                         | chr17:77995382-77996060  | 679  | 19 | 2.65E-02 | 10.30 | -1.21 | 6.66E-03 |
| C19orf29 | chromosome 19 open reading frame 29                         | chr19:3564582-3565297    | 716  | 21 | 1.80E-02 | 11.45 | -1.35 | 1.18E-02 |
| C19orf56 | chromosome 19 open reading frame 56                         | chr19:12636672-12637411  | 740  | 21 | 3.62E-02 | 9.46  | -1.90 | 6.93E-04 |
| C1orf128 | chromosome 1 open reading frame 128                         | chr1:23990487-23992341   | 1855 | 52 | 1.42E-02 | 12.07 | -1.43 | 2.08E-03 |
| C1orf151 | chromosome 1 open reading frame 151                         | chr1:19795551-19796133   | 583  | 17 | 4.40E-02 | 8.95  | -1.55 | 7.42E-03 |
| C1orf41  | chromosome 1 open reading frame 41                          | chr1:54187151-54188076   | 926  | 26 | 3.52E-02 | 9.52  | -1.34 | 2.99E-02 |
| C1orf85  | chromosome 1 open reading frame 85                          | chr1:154575759-154576395 | 637  | 18 | 4.80E-02 | 8.71  | 1.26  | 4.66E-02 |
| C1orf93  | chromosome 1 open reading frame 93                          | chr1:2507581-2508229     | 649  | 13 | 4.55E-02 | 8.84  | -1.35 | 6.49E-03 |
| C20orf11 | chromosome 20 open reading frame 11                         | chr20:61040111-61041023  | 913  | 19 | 1.03E-02 | 13.01 | -1.53 | 5.69E-03 |
| C20orf27 | chromosome 20 open reading frame 27                         | chr20:3709279-3710018    | 740  | 21 | 2.52E-02 | 10.46 | -1.24 | 4.75E-02 |
| C21orf34 | chromosome 21 open reading frame 34                         | chr21:16366745-16367817  | 1073 | 27 | 2.27E-02 | 10.74 | -1.14 | 1.54E-02 |
| C22orf29 | chromosome 22 open reading frame 29                         | chr22:18219907-18221515  | 1609 | 43 | 1.89E-02 | 11.32 | -1.24 | 4.64E-02 |
| C2orf46  | chromosome 2 open reading frame 46                          | chr2:8390478-8391324     | 847  | 23 | 4.01E-03 | 15.86 | -1.15 | 4.34E-02 |
| C3orf64  | chromosome 3 open reading frame 64                          | chr3:69106575-69107162   | 588  | 17 | 2.42E-02 | 10.57 | -1.52 | 1.70E-02 |
| C7orf20  | chromosome 7 open reading frame 20                          | chr7:884201-884700       | 500  | 14 | 3.63E-02 | 9.45  | -1.19 | 4.38E-02 |
| C8orf55  | chromosome 8 open reading frame 55                          | chr8:143804973-143805700 | 728  | 21 | 2.91E-02 | 10.05 | -1.19 | 4.76E-02 |
| C9orf105 | chromosome 9 open reading                                   | chr9:37772786-37773562   | 777  | 22 | 2.07E-02 | 11.03 | -1.48 | 7.90E-03 |
| C9orf116 | chromosome 9 open reading frame 116                         | chr9:137538759-137539616 | 858  | 19 | 1.75E-02 | 11.51 | -1.56 | 1.28E-02 |
| C9orf3   | chromosome 9 open reading frame 3                           | chr9:96525359-96525942   | 584  | 15 | 3.71E-02 | 9.39  | 1.15  | 4.66E-02 |
| CA5B     | carbonic anhydrase VB, mitochondrial                        | chrX:15676938-15677753   | 816  | 21 | 1.22E-02 | 12.48 | -1.19 | 1.51E-02 |
| CACNA2D2 | calcium channel, voltage-dependent, alpha 2/delta subunit 2 | chr3:50349280-50350005   | 726  | 20 | 2.37E-02 | 10.62 | -1.30 | 3.65E-02 |
| CALML4   | Calmodulin-like 4                                           | chr15:66288414-66289018  | 605  | 15 | 5.00E-02 | 8.60  | 1.17  | 4.56E-02 |
| CAMK2N1  | calcium/calmodulin-dependent protein kinase II inhibitor 1  | chr1:20688719-20689657   | 939  | 24 | 3.95E-02 | 9.23  | -1.72 | 1.08E-02 |
| CAMSAP1  | calmodulin regulated spectrin-associated protein 1          | chr9:137921384-137922022 | 639  | 19 | 2.08E-02 | 11.02 | -1.86 | 5.58E-04 |

|          |                                                                                   |                           |      |    |          |       |       |          |
|----------|-----------------------------------------------------------------------------------|---------------------------|------|----|----------|-------|-------|----------|
| CARD8    | caspase recruitment domain family, member 8                                       | chr19:53236277-53236755   | 479  | 14 | 9.09E-03 | 13.41 | -1.41 | 1.34E-02 |
| CARHSP1  | calcium regulated heat stable protein 1, 24kDa                                    | chr16:8859452-8860167     | 716  | 15 | 2.06E-02 | 11.05 | -1.52 | 9.59E-03 |
| CASP7    | caspase 7, apoptosis-related cysteine peptidase                                   | chr10:115496691-115497319 | 629  | 12 | 3.37E-02 | 9.66  | -2.45 | 6.37E-04 |
| CBX5     | chromobox homolog 5 (HP1 alpha homolog, Drosophila)                               | chr12:52964079-52965329   | 1251 | 34 | 5.14E-03 | 15.06 | -1.28 | 3.06E-02 |
| CCDC144A | coiled-coil domain containing 144A                                                | chr17:18469524-18469960   | 437  | 10 | 4.48E-02 | 8.90  | 1.15  | 6.32E-03 |
| CCDC151  | coiled-coil domain containing 151                                                 | chr19:11388319-11388799   | 481  | 14 | 3.56E-02 | 9.49  | -1.22 | 3.04E-02 |
| CCDC21   | coiled-coil domain containing 21                                                  | chr1:26387639-26388361    | 723  | 21 | 1.20E-02 | 12.51 | -1.41 | 7.17E-03 |
| CCDC92   | coiled-coil domain containing 92                                                  | chr12:122993965-122994738 | 774  | 18 | 4.18E-02 | 9.07  | -1.35 | 2.22E-02 |
| CCPG1    | cell cycle progression 1                                                          | chr15:53579153-53579773   | 621  | 13 | 2.54E-02 | 10.44 | 1.30  | 5.36E-03 |
| CIRBP    | cold inducible RNA binding protein                                                | chr19:1213533-1214142     | 610  | 13 | 4.72E-02 | 8.75  | -1.30 | 8.86E-03 |
| CKS1B    | CDC28 protein kinase regulatory subunit 1B                                        | chr1:153235172-153235507  | 336  | 10 | 3.84E-02 | 9.30  | -1.33 | 1.88E-02 |
| CLCN4    | chloride channel 4                                                                | chrX:10082570-10083296    | 727  | 14 | 3.88E-02 | 9.28  | 1.96  | 2.19E-03 |
| CLN6     | ceroid-lipofuscinosis, neuronal 6, late infantile, variant                        | chr15:66288414-66289018   | 605  | 15 | 5.00E-02 | 8.60  | -1.48 | 1.91E-02 |
| CLN8     | ceroid-lipofuscinosis, neuronal 8 (epilepsy, progressive with mental retardation) | chr8:1720507-1721887      | 1381 | 39 | 2.64E-05 | 31.95 | 1.42  | 3.23E-02 |
| COL5A1   | collagen, type V, alpha 1                                                         | chr9:136667457-136668266  | 810  | 20 | 1.69E-02 | 11.61 | -1.42 | 4.23E-03 |
| COL7A1   | collagen, type VII, alpha 1 (epidermolysis bullosa, dystrophic, dominant and rec) | chr3:48575558-48576147    | 590  | 10 | 1.11E-02 | 12.75 | -1.30 | 5.31E-03 |
| CPEB4    | cytoplasmic polyadenylation element binding protein 4                             | chr5:173242841-173243553  | 713  | 20 | 2.25E-02 | 10.77 | 1.32  | 4.16E-02 |
| CPNE2    | copine II                                                                         | chr16:55682495-55683490   | 996  | 28 | 1.71E-02 | 11.56 | -1.35 | 1.83E-02 |
| CPSF1    | cleavage and polyadenylation specific factor 1, 160kDa                            | chr8:145618685-145619351  | 667  | 18 | 3.31E-02 | 9.71  | -1.29 | 2.07E-02 |
| CRIM1    | cysteine rich transmembrane BMP regulator 1 (chordin-like)                        | chr2:36437937-36438570    | 634  | 18 | 2.74E-02 | 10.22 | 1.72  | 6.82E-05 |
| CRISPLD2 | cysteine-rich secretory protein LCCL domain containing 2                          | chr16:83407036-83407630   | 595  | 10 | 4.34E-02 | 8.98  | -1.28 | 2.70E-02 |
| CSK      | c-src tyrosine kinase                                                             | chr15:72852306-72853347   | 1042 | 29 | 4.34E-02 | 8.98  | -1.27 | 3.28E-02 |
| CTDSP1   | CTD (carboxy-terminal domain, RNA polymerase II, polypeptide A) small phosphatas  | chr2:218912808-218913629  | 822  | 18 | 2.27E-02 | 10.74 | -1.25 | 1.99E-02 |
| CTDSP2   | CTD (carboxy-terminal domain, RNA polymerase II, polypeptide A) small phosphatas  | chr12:56533895-56534239   | 345  | 10 | 4.40E-02 | 8.95  | -1.35 | 1.33E-02 |

|              |                                                                     |                           |      |    |          |       |       |          |
|--------------|---------------------------------------------------------------------|---------------------------|------|----|----------|-------|-------|----------|
| CUGBP1       | CUG triplet repeat, RNA binding protein 1                           | chr11:47477131-47477758   | 628  | 18 | 3.11E-02 | 9.87  | -1.45 | 2.87E-03 |
| CYB561D1     | cytochrome b-561 domain containing 1                                | chr1:109832219-109832915  | 697  | 20 | 3.98E-02 | 9.21  | -1.30 | 2.37E-02 |
| CYFIP2       | cytoplasmic FMR1 interacting protein 2                              | chr5:156667251-156667956  | 706  | 19 | 1.41E-02 | 12.08 | -2.01 | 2.59E-02 |
| DAZAP1       | DAZ associated protein 1                                            | chr19:1350720-1351402     | 683  | 19 | 2.88E-02 | 10.08 | -1.45 | 8.31E-03 |
| DBNDD1       | dysbindin (dystrobrevin binding protein 1) domain containing 1      | chr16:88625558-88627275   | 1718 | 40 | 1.93E-04 | 25.48 | -1.41 | 1.81E-02 |
| DGKZ         | diacylglycerol kinase, zeta 104kDa                                  | chr11:46312509-46312965   | 457  | 14 | 1.16E-02 | 12.62 | -1.42 | 1.54E-03 |
| DHRS4        | dehydrogenase/reductase (SDR family) member 4                       | chr14:23607994-23608887   | 894  | 25 | 2.36E-02 | 10.64 | -1.33 | 2.76E-02 |
| DHRS9        | dehydrogenase/reductase (SDR family) member 9                       | chr2:169633720-169634333  | 614  | 18 | 4.32E-02 | 8.99  | 1.10  | 2.80E-02 |
| DHRSX        | dehydrogenase/reductase (SDR family) X-linked                       | chrX:2429121-2429928      | 808  | 23 | 5.96E-03 | 14.69 | 1.17  | 4.27E-02 |
| DIDO1        | death inducer-obliterator 1                                         | chr20:61040111-61041023   | 913  | 19 | 1.03E-02 | 13.01 | -2.00 | 1.32E-03 |
| DKFZp434K191 | POM121-like protein                                                 | chr22:22970633-22971548   | 916  | 19 | 3.41E-03 | 16.35 | 1.10  | 8.32E-03 |
| DLG3         | discs, large homolog 3 (neuroendocrine-dlg, Drosophila)             | chrX:69560127-69560719    | 593  | 15 | 4.03E-02 | 9.18  | -1.38 | 2.68E-02 |
| DLGAP3       | discs, large (Drosophila) homolog-associated protein 3              | chr1:35221821-35222627    | 807  | 22 | 6.82E-03 | 14.30 | -1.11 | 4.77E-02 |
| DSC1         | desmocollin 1                                                       | chr18:27001111-27001506   | 396  | 11 | 4.88E-02 | 8.66  | 1.44  | 4.78E-03 |
| DYNLRB1      | dynein, light chain, roadblock-type 1                               | chr20:32597202-32597568   | 367  | 11 | 3.16E-02 | 9.82  | -1.15 | 4.15E-02 |
| DYX1C1       | dyslexia susceptibility 1 candidate 1                               | chr15:53579153-53579773   | 621  | 13 | 2.54E-02 | 10.44 | -1.65 | 2.75E-02 |
| EIF2C2       | Eukaryotic translation initiation factor 2C, 2                      | chr8:141640667-141641604  | 938  | 26 | 2.26E-02 | 10.76 | -1.73 | 4.11E-02 |
| EIF3F        | eukaryotic translation initiation factor 3, subunit F               | chr2:58324176-58325154    | 979  | 25 | 7.06E-03 | 14.20 | -1.25 | 2.97E-02 |
| ELK1         | ELK1, member of ETS oncogene family                                 | chrX:47379659-47380243    | 585  | 14 | 4.84E-02 | 8.68  | -1.23 | 3.72E-02 |
| ELL2         | elongation factor, RNA polymerase II, 2                             | chr5:95322519-95323146    | 628  | 18 | 4.06E-02 | 9.16  | 1.73  | 1.73E-02 |
| EME2         | essential meiotic endonuclease 1 homolog 2 (S. pombe)               | chr16:1771029-1771916     | 888  | 24 | 1.21E-02 | 12.51 | -1.20 | 4.54E-02 |
| EP400NL      | EP400 N-terminal like                                               | chr12:131130788-131131922 | 1135 | 31 | 4.80E-03 | 15.30 | -1.36 | 1.80E-02 |
| EPB41        | erythrocyte membrane protein band 4.1 (elliptocytosis 1, RH-linked) | chr1:29083808-29084958    | 1151 | 24 | 1.63E-02 | 11.70 | -1.20 | 3.61E-02 |
| EPHA4        | EPH receptor A4                                                     | chr2:222142938-222144085  | 1148 | 25 | 1.27E-03 | 19.45 | -1.29 | 1.99E-02 |
| EPOR         | erythropoietin receptor                                             | chr19:11388319-11388799   | 481  | 14 | 3.56E-02 | 9.49  | 1.31  | 3.18E-02 |

|          |                                                                     |                           |      |    |          |       |       |          |
|----------|---------------------------------------------------------------------|---------------------------|------|----|----------|-------|-------|----------|
| EPPK1    | epiplakin 1                                                         | chr8:145023818-145024397  | 580  | 16 | 4.72E-02 | 8.75  | -1.61 | 4.43E-03 |
| EPS8L1   | EPS8-like 1                                                         | chr19:60282965-60283865   | 901  | 18 | 1.99E-02 | 11.16 | -1.30 | 5.17E-03 |
| ETHE1    | ethylmalonic encephalopathy 1                                       | chr19:48728591-48729301   | 711  | 20 | 2.89E-02 | 10.07 | -1.33 | 1.36E-02 |
| EXT2     | exostoses (multiple) 2                                              | chr11:44085944-44086674   | 731  | 20 | 3.70E-02 | 9.40  | -1.59 | 1.19E-03 |
| FABP5    | fatty acid binding protein 5                                        | chr7:151770436-151771145  | 710  | 20 | 2.06E-02 | 11.05 | -1.39 | 4.29E-02 |
| FAM111A  | family with sequence similarity 111, member A                       | chr11:58668736-58669545   | 810  | 19 | 2.90E-02 | 10.06 | -1.44 | 2.10E-02 |
| FAM120C  | family with sequence similarity 120C                                | chrX:54225005-54226319    | 1315 | 35 | 6.97E-03 | 14.24 | -1.69 | 1.11E-03 |
| FAM130A1 | family with sequence similarity 130, member A1                      | chr12:49761995-49763016   | 1022 | 29 | 3.79E-02 | 9.34  | -1.72 | 1.53E-03 |
| FAM135A  | family with sequence similarity 135, member A                       | chr6:71333497-71334072    | 576  | 17 | 1.52E-02 | 11.87 | 1.38  | 1.82E-02 |
| FAM26B   | family with sequence similarity 26, member B                        | chr10:105197126-105197847 | 722  | 21 | 2.18E-02 | 10.87 | -1.22 | 9.35E-03 |
| FAM41C   | ribosomal protein L23a pseudogene 7                                 | chr2:114107786-114108391  | 606  | 18 | 1.18E-02 | 12.56 | -1.36 | 5.00E-02 |
| FAM49B   | family with sequence similarity 49, member B                        | chr8:130951421-130952038  | 618  | 10 | 1.09E-02 | 12.80 | 1.90  | 1.24E-02 |
| FAM54B   | family with sequence similarity 54, member B                        | chr1:25998481-25999536    | 1056 | 23 | 2.08E-02 | 11.01 | -1.26 | 1.64E-02 |
| FAM83H   | family with sequence similarity 83, member H                        | chr8:144889408-144890269  | 862  | 24 | 6.22E-03 | 14.60 | -1.37 | 4.13E-03 |
| FAM96B   | family with sequence similarity 96, member B                        | chr16:65511887-65512495   | 609  | 13 | 4.84E-02 | 8.69  | -1.18 | 3.38E-02 |
| FBXO4    | F-box protein 4                                                     | chr5:41958702-41959391    | 690  | 17 | 2.87E-02 | 10.09 | -1.41 | 3.39E-03 |
| FBXO44   | F-box protein 44                                                    | chr1:11646630-11647267    | 638  | 17 | 3.05E-02 | 9.93  | -1.28 | 6.94E-03 |
| FBXO9    | F-box protein 9                                                     | chr6:53033483-53034247    | 765  | 22 | 2.68E-02 | 10.27 | -1.97 | 1.13E-02 |
| FHL3     | four and a half LIM domains 3                                       | chr1:38237132-38238176    | 1045 | 30 | 2.47E-02 | 10.52 | -1.25 | 3.38E-02 |
| FKBP7    | FK506 binding protein 7                                             | chr2:179058343-179059053  | 711  | 20 | 2.69E-02 | 10.27 | 1.47  | 2.28E-02 |
| FLAD1    | FAD1 flavin adenine dinucleotide synthetase homolog (S. cerevisiae) | chr1:153235172-153235507  | 336  | 10 | 3.84E-02 | 9.30  | -1.36 | 7.92E-03 |
| FLJ14213 | protor-2                                                            | chr11:36427468-36428084   | 617  | 14 | 4.20E-02 | 9.06  | -1.55 | 1.28E-03 |
| FLJ20323 | hypothetical protein FLJ20323                                       | chr7:7570844-7571752      | 909  | 24 | 1.04E-02 | 12.94 | -1.45 | 3.16E-02 |
| FLJ22795 | hypothetical protein FLJ22795                                       | chr15:80590524-80592178   | 1655 | 45 | 1.63E-02 | 11.71 | -1.21 | 5.21E-03 |
| FLJ40296 | FLJ40296 protein                                                    | chr13:56632612-56633637   | 1026 | 28 | 1.75E-02 | 11.52 | 1.22  | 1.40E-03 |
| FLJ45224 | FLJ45224 protein                                                    | chr9:138999924-139000612  | 689  | 19 | 2.85E-02 | 10.11 | -1.10 | 5.90E-03 |
| FMNL3    | formin-like 3                                                       | chr12:48387328-48388141   | 814  | 20 | 4.20E-02 | 9.06  | -1.35 | 2.17E-03 |
| FNDC3B   | fibronectin type III domain containing 3B                           | chr3:173307762-173308394  | 633  | 18 | 1.21E-02 | 12.49 | 1.44  | 6.07E-03 |
| FOXP1    | forkhead box P1                                                     | chr3:71627633-71628246    | 614  | 10 | 4.79E-02 | 8.71  | -1.15 | 2.68E-02 |
| FRAG1    | FGF receptor activating protein 1                                   | chr11:3786962-3787655     | 694  | 16 | 3.37E-02 | 9.66  | -1.20 | 3.66E-03 |

|         |                                                                                  |                          |      |    |          |       |       |          |
|---------|----------------------------------------------------------------------------------|--------------------------|------|----|----------|-------|-------|----------|
| FRMPD2  | FERM and PDZ domain containing 2                                                 | chr10:48481913-48482546  | 634  | 16 | 2.79E-02 | 10.17 | 1.09  | 1.43E-02 |
| FUT10   | fucosyltransferase 10 (alpha (1,3) fucosyltransferase)                           | chr8:33449492-33450285   | 794  | 23 | 1.49E-02 | 11.93 | -1.38 | 4.43E-03 |
| FXYD5   | FXYD domain containing ion transport regulator 5                                 | chr19:40316142-40316876  | 735  | 21 | 3.14E-02 | 9.83  | -1.34 | 4.00E-02 |
| FZD8    | frizzled homolog 8 (Drosophila)                                                  | chr10:35970414-35971005  | 592  | 16 | 4.11E-02 | 9.12  | -1.34 | 4.40E-02 |
| FZR1    | fizzy/cell division cycle 20 related 1 (Drosophila)                              | chr19:3473887-3475032    | 1146 | 32 | 1.01E-02 | 13.05 | -1.45 | 1.76E-02 |
| GALNT4  | UDP-N-acetyl-alpha-D-galactosamine:polypeptide N-acetylgalactosaminyltransferase | chr12:88441911-88442499  | 589  | 17 | 3.67E-02 | 9.42  | -1.56 | 1.37E-02 |
| GCHFR   | GTP cyclohydrolase I feedback regulator                                          | chr15:38847179-38848158  | 980  | 27 | 4.16E-02 | 9.09  | -1.23 | 1.67E-03 |
| GGT1    | gamma-glutamyltransferase 1                                                      | chr22:22970633-22971548  | 916  | 19 | 3.41E-03 | 16.35 | -1.10 | 1.75E-02 |
| GLCE    | glucuronic acid epimerase                                                        | chr15:67240878-67241760  | 883  | 25 | 3.04E-02 | 9.94  | -1.73 | 2.43E-03 |
| GLI2    | GLI-Kruppel family member GLI2                                                   | chr2:121263980-121265182 | 1203 | 30 | 7.83E-03 | 13.89 | -1.29 | 4.14E-03 |
| GLOD4   | glyoxalase domain containing 4                                                   | chr17:598746-599975      | 1230 | 35 | 1.93E-04 | 25.44 | -1.19 | 4.32E-02 |
| GLTPD1  | glycolipid transfer protein domain containing 1                                  | chr1:1255119-1255802     | 684  | 15 | 1.61E-02 | 11.73 | -1.25 | 1.84E-02 |
| GLTSCR2 | glioma tumor suppressor candidate region gene 2                                  | chr19:52937741-52938468  | 728  | 21 | 3.72E-02 | 9.38  | -1.27 | 3.61E-02 |
| GNA11   | guanine nucleotide binding protein (G protein), alpha 11 (Gq class)              | chr19:3073208-3073852    | 645  | 18 | 4.44E-02 | 8.92  | -1.87 | 4.17E-04 |
| GOLGA6  | golgi autoantigen, golgin subfamily a, 6                                         | chr15:73410005-73410589  | 585  | 17 | 1.90E-02 | 11.29 | -1.09 | 3.80E-02 |
| GPHN    | gephyrin                                                                         | chr14:66043488-66044135  | 648  | 18 | 2.44E-02 | 10.53 | -1.47 | 7.34E-03 |
| GRHL1   | grainyhead-like 1 (Drosophila)                                                   | chr2:10006148-10006679   | 532  | 16 | 2.41E-02 | 10.57 | -1.93 | 2.10E-05 |
| GRIK2   | glutamate receptor, ionotropic, kainate 2                                        | chr6:101945922-101946827 | 906  | 24 | 1.85E-02 | 11.36 | 1.40  | 3.44E-02 |
| GSTZ1   | glutathione transferase zeta 1 (maleylacetoacetate isomerase)                    | chr14:76858171-76858810  | 640  | 18 | 3.42E-02 | 9.60  | -1.37 | 2.32E-02 |
| GTF2F1  | general transcription factor IIF, polypeptide 1, 74kDa                           | chr19:6331296-6331922    | 627  | 18 | 4.29E-02 | 9.01  | -1.15 | 4.59E-02 |
| H2BFS   | H2B histone family, member S                                                     | chr6:26308019-26308606   | 588  | 17 | 4.56E-02 | 8.84  | -1.75 | 5.41E-03 |
| HBA1    | hemoglobin, alpha 1                                                              | chr16:149514-150672      | 1159 | 33 | 3.73E-03 | 16.05 | -1.33 | 4.43E-02 |
| HCCA2   | HCCA2 protein                                                                    | chr11:1463024-1464509    | 1486 | 38 | 1.09E-02 | 12.82 | -1.24 | 3.46E-02 |
| HCRTR2  | hypocretin (orexin) receptor 2                                                   | chr6:55146553-55147261   | 709  | 20 | 4.30E-02 | 9.00  | -1.18 | 4.10E-02 |
| HDAC3   | histone deacetylase 3                                                            | chr5:140978477-140979173 | 697  | 19 | 4.03E-02 | 9.18  | -1.32 | 6.63E-03 |

|           |                                                      |                           |      |    |          |       |       |          |
|-----------|------------------------------------------------------|---------------------------|------|----|----------|-------|-------|----------|
| HES2      | hairy and enhancer of split 2 (Drosophila)           | chr1:6401463-6402361      | 899  | 23 | 2.93E-02 | 10.04 | -1.20 | 4.91E-02 |
| HIPK1     | homeodomain interacting protein kinase 1             | chr1:114318915-114319679  | 765  | 22 | 2.35E-02 | 10.65 | -1.21 | 2.45E-02 |
| HIST1H2BC | histone cluster 1, H2bg                              | chr6:26308019-26308606    | 588  | 17 | 4.56E-02 | 8.84  | -1.56 | 5.87E-03 |
| HIST1H2BH | histone cluster 1, H2bh                              | chr6:26308019-26308606    | 588  | 17 | 4.56E-02 | 8.84  | -1.51 | 3.56E-03 |
| HLA-DOA   | major histocompatibility complex, class II, DO alpha | chr6:33085180-33085968    | 789  | 21 | 6.64E-03 | 14.36 | 1.27  | 4.85E-02 |
| HLF       | hepatic leukemia factor                              | chr17:50752704-50753707   | 1004 | 27 | 1.30E-02 | 12.33 | -1.27 | 1.97E-02 |
| HN1       | hematological and neurological expressed 1           | chr17:70637652-70638321   | 670  | 19 | 1.92E-02 | 11.26 | -1.41 | 4.78E-03 |
| HN1L      | hematological and neurological expressed 1-like      | chr16:1771029-1771916     | 888  | 24 | 1.21E-02 | 12.51 | -1.22 | 4.77E-02 |
| HNRNPA3P2 | NDRG family member 3                                 | chr20:34840873-34841680   | 808  | 22 | 1.58E-02 | 11.79 | -1.29 | 3.85E-02 |
| HNRNPF    | heterogeneous nuclear ribonucleoprotein F            | chr10:43223774-43224383   | 610  | 16 | 3.88E-02 | 9.27  | -1.38 | 1.26E-02 |
| HOXA3     | homeobox A3                                          | chr7:27128586-27129257    | 672  | 18 | 3.46E-02 | 9.57  | -1.56 | 1.53E-03 |
| HSD17B1   | hydroxysteroid (17-beta) dehydrogenase 1             | chr17:37953731-37954366   | 636  | 17 | 3.31E-02 | 9.70  | -1.16 | 4.46E-02 |
| HSF1      | heat shock transcription factor 1                    | chr8:145480690-145481506  | 817  | 23 | 1.10E-02 | 12.78 | -1.26 | 7.93E-03 |
| HSPA1A    | heat shock 70kDa protein 1A                          | chr6:31904789-31905394    | 606  | 17 | 4.72E-02 | 8.75  | 1.23  | 3.92E-02 |
| HSPA4     | Heat shock 70kDa protein 4                           | chr5:132414615-132415282  | 668  | 17 | 4.95E-02 | 8.62  | -1.35 | 2.99E-02 |
| HYOU1     | hypoxia up-regulated 1                               | chr11:118287230-118288100 | 871  | 21 | 2.36E-02 | 10.64 | -1.31 | 4.65E-02 |
| HYPK      | Huntingtin interacting protein K                     | chr15:41875012-41875624   | 613  | 12 | 4.69E-02 | 8.77  | -1.75 | 3.24E-03 |
| ICK       | intestinal cell (MAK-like) kinase                    | chr6:52967559-52968234    | 676  | 16 | 2.47E-02 | 10.51 | -1.71 | 5.18E-03 |
| IDS       | iduronate 2-sulfatase (Hunter syndrome)              | chrX:148426001-148427098  | 1098 | 27 | 3.75E-02 | 9.36  | -1.15 | 3.88E-02 |
| IFNA16    | interferon, alpha 16                                 | chr9:21328142-21328734    | 593  | 17 | 4.50E-02 | 8.88  | 1.10  | 4.73E-02 |
| IFRD2     | interferon-related developmental regulator 2         | chr3:50349280-50350005    | 726  | 20 | 2.37E-02 | 10.62 | -1.84 | 2.26E-04 |
| IGF2      | insulin-like growth factor 2 (somatomedin A)         | chr11:2123693-2124397     | 705  | 19 | 1.30E-02 | 12.31 | -1.37 | 4.92E-03 |
| IGHA1     | immunoglobulin heavy constant alpha 1                | chr14:106190798-106191390 | 593  | 17 | 1.58E-04 | 26.37 | -1.20 | 1.97E-02 |
| IGSF3     | immunoglobulin superfamily, member 3                 | chr1:117012160-117013103  | 944  | 21 | 7.25E-03 | 14.12 | -1.52 | 3.39E-02 |
| IHPK1     | inositol hexaphosphate kinase 1                      | chr3:49740434-49740865    | 432  | 13 | 4.73E-02 | 8.74  | -1.27 | 2.23E-02 |
| IMAA      | solute carrier family 7                              | chr16:21443421-21444257   | 837  | 24 | 1.21E-02 | 12.50 | -1.26 | 2.06E-02 |
| INOC1     | INO80 complex homolog 1 (S. cerevisiae)              | chr15:38834427-38835394   | 968  | 24 | 2.08E-02 | 11.01 | -1.16 | 4.70E-02 |
| IRX5      | iroquois homeobox 5                                  | chr16:53521889-53522936   | 1048 | 24 | 2.73E-02 | 10.23 | -1.17 | 4.81E-02 |
| ITGB4     | integrin, beta 4                                     | chr17:71228920-71229583   | 664  | 19 | 8.70E-03 | 13.56 | -1.81 | 5.95E-03 |



|                |                                                                          |                           |      |    |          |       |       |          |
|----------------|--------------------------------------------------------------------------|---------------------------|------|----|----------|-------|-------|----------|
| JPH2           | junctophilin 2                                                           | chr20:42248774-42249377   | 604  | 16 | 4.80E-02 | 8.71  | -1.53 | 3.13E-02 |
| KAP2.1B        | keratin associated protein 2.1B                                          | chr17:36469261-36469990   | 730  | 21 | 3.38E-02 | 9.64  | 1.15  | 1.26E-03 |
| KCNAB2         | potassium voltage-gated channel, shaker-related subfamily, beta member 2 | chr1:6017649-6018326      | 678  | 19 | 3.83E-02 | 9.31  | -1.30 | 1.09E-03 |
| KCNJ12         | potassium inwardly-rectifying channel, subfamily J, member 12            | chr17:21215558-21216694   | 1137 | 31 | 3.92E-02 | 9.25  | -1.80 | 1.59E-03 |
| KIAA0226       | KIAA0226                                                                 | chr3:198954376-198954954  | 579  | 16 | 2.85E-02 | 10.12 | -1.17 | 1.04E-02 |
| KIAA0323       | KIAA0323                                                                 | chr14:23970284-23971023   | 740  | 20 | 2.95E-02 | 10.02 | -1.20 | 4.19E-02 |
| KIAA0515       | KIAA0515                                                                 | chr9:133343651-133344404  | 754  | 21 | 2.31E-02 | 10.71 | -1.39 | 1.77E-02 |
| KIAA1545       | KIAA1545 protein                                                         | chr12:131649613-131650431 | 819  | 23 | 1.85E-03 | 18.41 | -1.18 | 4.23E-02 |
| KIAA1920       | KIAA1920 protein                                                         | chr15:81906637-81907723   | 1087 | 30 | 1.35E-02 | 12.21 | -1.12 | 3.79E-03 |
| KLK8           | kallikrein-related peptidase 8                                           | chr19:56195229-56195833   | 605  | 14 | 3.22E-02 | 9.77  | 1.19  | 3.27E-02 |
| KRT17          | keratin 17                                                               | chr17:37035091-37036189   | 1099 | 31 | 7.18E-03 | 14.15 | -1.74 | 2.80E-02 |
| LASS3          | LAG1 homolog, ceramide synthase 3                                        | chr15:98914126-98916197   | 2072 | 54 | 2.06E-02 | 11.05 | -1.25 | 5.57E-03 |
| LASS6          | LAG1 homolog, ceramide synthase 6                                        | chr2:169018286-169019171  | 886  | 25 | 2.95E-02 | 10.02 | 1.44  | 2.53E-02 |
| LETM1          | Leucine zipper-EF-hand containing transmembrane protein 1                | chr4:1833808-1834462      | 655  | 19 | 2.48E-02 | 10.50 | -1.62 | 4.71E-03 |
| LIN37          | lin-37 homolog (C. elegans)                                              | chr19:40914258-40915100   | 843  | 23 | 2.95E-02 | 10.02 | 1.15  | 8.68E-03 |
| LIN52          | lin-52 homolog (C. elegans)                                              | chr14:73620058-73620795   | 738  | 20 | 2.40E-02 | 10.59 | -1.50 | 7.20E-03 |
| LL22NC03-5H6.5 | hypothetical protein FLJ20699                                            | chr22:45070226-45070868   | 643  | 17 | 4.93E-02 | 8.63  | -1.25 | 1.87E-02 |
| LOC100130536   | hypothetical protein LOC100130536                                        | chr6:32231013-32231625    | 613  | 12 | 2.95E-02 | 10.02 | -1.51 | 4.21E-02 |
| LOC100134082   | hypothetical protein LOC100134082                                        | chr7:150439809-150440608  | 800  | 23 | 1.32E-02 | 12.27 | 1.15  | 2.14E-02 |
| LOC100134365   | hypothetical protein LOC100134365                                        | chr2:96350334-96351010    | 677  | 14 | 3.33E-02 | 9.68  | -1.35 | 3.37E-02 |
| LOC116236      | hypothetical protein LOC116236                                           | chr17:24923347-24924293   | 947  | 26 | 4.30E-02 | 9.01  | -1.28 | 4.43E-02 |
| LOC149478      | Hypothetical protein LOC149478                                           | chr1:45037848-45038818    | 971  | 23 | 1.32E-02 | 12.28 | -1.29 | 1.58E-02 |
| LOC165186      | similar to RIKEN cDNA 4632412N22 gene                                    | chr2:29102890-29103516    | 627  | 17 | 2.58E-02 | 10.38 | -1.24 | 3.98E-02 |
| LOC257407      | hypothetical protein LOC257407                                           | chr2:231625240-231625927  | 688  | 19 | 3.29E-02 | 9.73  | -1.26 | 5.20E-03 |
| LOC645722      | hypothetical LOC645722                                                   | chr16:21443421-21444257   | 837  | 24 | 1.21E-02 | 12.50 | -1.67 | 3.17E-03 |
| LOC90835       | hypothetical protein LOC90835                                            | chr16:30680003-30681320   | 1318 | 38 | 1.99E-02 | 11.16 | -1.32 | 5.50E-03 |

|          |                                                                                          |                           |      |    |          |       |       |          |
|----------|------------------------------------------------------------------------------------------|---------------------------|------|----|----------|-------|-------|----------|
| LOC96610 | hypothetical gene LOC96610                                                               | chr22:21314999-21316082   | 1084 | 30 | 5.68E-03 | 14.82 | -1.14 | 3.59E-02 |
| LPHN1    | latrophilin 1                                                                            | chr19:14177197-14177822   | 626  | 17 | 2.77E-02 | 10.19 | -1.34 | 1.24E-03 |
| LRRC42   | leucine rich repeat containing 42                                                        | chr1:54187151-54188076    | 926  | 26 | 3.52E-02 | 9.52  | -1.26 | 1.68E-02 |
| LSM2     | LSM2 homolog, U6 small nuclear RNA associated ( <i>S. cerevisiae</i> )                   | chr6:31873223-31873813    | 591  | 15 | 1.39E-02 | 12.13 | -1.30 | 4.45E-03 |
| LSM7     | LSM7 homolog, U6 small nuclear RNA associated ( <i>S. cerevisiae</i> )                   | chr19:2284096-2284801     | 706  | 20 | 3.59E-02 | 9.47  | -1.29 | 1.45E-02 |
| LSS      | lanosterol synthase (2,3-oxidosqualene-lanosterol cyclase)                               | chr21:46427939-46428777   | 839  | 24 | 1.85E-02 | 11.36 | -1.27 | 2.52E-02 |
| LYRM4    | LYR motif containing 4                                                                   | chr6:5058191-5058805      | 615  | 11 | 1.09E-02 | 12.81 | -1.25 | 4.54E-02 |
| MAF1     | MAF1 homolog ( <i>S. cerevisiae</i> )                                                    | chr8:145236676-145237756  | 1081 | 31 | 1.06E-02 | 12.91 | -1.26 | 4.99E-02 |
| MAML1    | mastermind-like 1 ( <i>Drosophila</i> )                                                  | chr5:179151418-179152044  | 627  | 18 | 2.55E-02 | 10.42 | -1.59 | 3.72E-04 |
| MAN1A2   | mannosidase, alpha, class 1A, member 2                                                   | chr1:117708311-117709028  | 718  | 18 | 3.70E-02 | 9.40  | 1.44  | 1.33E-02 |
| MAP2K3   | mitogen-activated protein kinase kinase 3                                                | chr17:21125336-21126121   | 786  | 22 | 1.29E-02 | 12.35 | -1.43 | 1.41E-02 |
| MARK2    | MAP/microtubule affinity-regulating kinase 2                                             | chr11:63361188-63361777   | 590  | 17 | 4.19E-02 | 9.06  | -1.44 | 2.08E-02 |
| MARVELD1 | MARVEL domain containing 1                                                               | chr10:99457283-99458063   | 781  | 16 | 4.96E-02 | 8.62  | -1.16 | 2.67E-02 |
| MAX      | MYC associated factor X                                                                  | chr14:64638099-64638744   | 646  | 17 | 2.66E-02 | 10.29 | -1.22 | 4.23E-02 |
| MBD4     | methyl-CpG binding domain protein 4                                                      | chr3:130605571-130606335  | 765  | 19 | 1.49E-02 | 11.93 | -1.13 | 2.19E-02 |
| MDFIC    | MyoD family inhibitor domain containing                                                  | chr7:114350422-114351021  | 600  | 16 | 3.22E-02 | 9.77  | -1.42 | 1.73E-02 |
| MED8     | mediator complex subunit 8                                                               | chr1:43624511-43625205    | 695  | 19 | 2.45E-02 | 10.53 | -1.94 | 3.51E-05 |
| MEF2A    | myocyte enhancer factor 2A                                                               | chr15:97984549-97985224   | 676  | 13 | 4.70E-02 | 8.76  | 1.40  | 6.67E-03 |
| MGC26718 | Similar to ankyrin repeat domain 20A                                                     | chr9:43127294-43127905    | 612  | 18 | 7.43E-03 | 14.00 | -1.37 | 3.37E-02 |
| MGEA5    | meningioma expressed antigen 5 (hyaluronidase)                                           | chr10:103527007-103527730 | 724  | 20 | 3.01E-02 | 9.96  | -1.37 | 2.11E-02 |
| MIER2    | mesoderm induction early response 1, family member 2                                     | chr19:285785-286849       | 1065 | 30 | 1.81E-02 | 11.43 | -1.16 | 2.28E-02 |
| MIPEP    | mitochondrial intermediate peptidase                                                     | chr13:23374949-23375551   | 603  | 17 | 3.64E-02 | 9.44  | -1.26 | 2.71E-02 |
| MLL5     | myeloid/lymphoid or mixed-lineage leukemia 5 (trithorax homolog, <i>Drosophila</i> )     | chr7:104491675-104492274  | 600  | 17 | 4.97E-02 | 8.62  | -1.28 | 4.50E-02 |
| MLLT6    | myeloid/lymphoid or mixed-lineage leukemia (trithorax homolog, <i>Drosophila</i> ); tran | chr17:34112617-34113218   | 602  | 12 | 3.91E-02 | 9.26  | -1.42 | 2.09E-02 |
| MMS19    | MMS19 nucleotide excision repair homolog ( <i>S. cerevisiae</i> )                        | chr10:99248522-99249142   | 621  | 18 | 3.92E-02 | 9.25  | -1.30 | 4.51E-03 |

|          |                                                                                  |                          |      |    |          |       |       |          |
|----------|----------------------------------------------------------------------------------|--------------------------|------|----|----------|-------|-------|----------|
| MRAS     | muscle RAS oncogene homolog                                                      | chr3:139568666-139569273 | 608  | 12 | 3.98E-02 | 9.22  | -1.13 | 4.60E-02 |
| MT1P2    | metallothionein 1 pseudogene 2                                                   | chr16:55208329-55209139  | 811  | 23 | 9.55E-03 | 13.25 | -1.48 | 4.65E-02 |
| MTCH1    | mitochondrial carrier homolog 1 (C. elegans)                                     | chr6:37056152-37057270   | 1119 | 31 | 6.52E-03 | 14.44 | -1.29 | 4.73E-02 |
| MTF1     | metal-regulatory transcription factor 1                                          | chr1:38043540-38044329   | 790  | 21 | 2.95E-02 | 10.02 | -1.74 | 1.16E-02 |
| MTIF3    | mitochondrial translational initiation factor 3                                  | chr13:26922013-26922774  | 762  | 22 | 2.70E-02 | 10.26 | -1.27 | 4.22E-02 |
| MTMR14   | myotubularin related protein 14                                                  | chr3:9713473-9714562     | 1090 | 30 | 1.35E-02 | 12.21 | -1.42 | 2.35E-03 |
| NADK     | NAD kinase                                                                       | chr1:1672800-1673524     | 725  | 20 | 3.81E-02 | 9.32  | -1.51 | 7.92E-04 |
| NADSYN1  | NAD synthetase 1                                                                 | chr11:70842164-70842873  | 710  | 16 | 1.50E-02 | 11.92 | -1.59 | 1.64E-03 |
| NAE1     | NEDD8 activating enzyme E1 subunit 1                                             | chr16:65396396-65397082  | 687  | 14 | 3.15E-02 | 9.83  | -1.25 | 1.85E-02 |
| NBEAL2   | neurobeachin-like 2                                                              | chr3:47019876-47020869   | 994  | 28 | 1.96E-02 | 11.21 | -1.30 | 1.15E-02 |
| NBL1     | neuroblastoma, suppression of tumorigenicity 1                                   | chr1:19854128-19854805   | 678  | 19 | 4.08E-02 | 9.14  | -1.18 | 3.94E-02 |
| NDUFB6   | NADH dehydrogenase (ubiquinone) 1 beta subcomplex, 6, 17kDa                      | chr9:32544740-32545447   | 708  | 16 | 2.75E-02 | 10.21 | 1.20  | 1.46E-02 |
| NEU1     | sialidase 1 (lysosomal sialidase)                                                | chr6:31957923-31958571   | 649  | 14 | 2.43E-02 | 10.55 | 1.54  | 7.03E-03 |
| NF2      | neurofibromin 2 (merlin)                                                         | chr22:28416029-28416944  | 916  | 26 | 1.03E-02 | 13.01 | 1.18  | 4.46E-02 |
| NFATC2IP | nuclear factor of activated T-cells, cytoplasmic, calcineurin-dependent 2 intera | chr16:28864493-28864984  | 492  | 15 | 1.17E-02 | 12.60 | -2.04 | 4.87E-03 |
| NHP2L1   | NHP2 non-histone chromosome protein 2-like 1 (S. cerevisiae)                     | chr22:40420241-40421025  | 785  | 21 | 1.17E-02 | 12.60 | -1.27 | 1.14E-02 |
| NICN1    | nicolin 1                                                                        | chr3:49431748-49432626   | 879  | 24 | 7.19E-03 | 14.14 | -1.43 | 8.61E-03 |
| NKAPL    | NFKB activating protein-like                                                     | chr6:28343442-28344021   | 580  | 11 | 4.98E-02 | 8.61  | 1.15  | 1.15E-02 |
| NKX2-2   | NK2 homeobox 2                                                                   | chr20:21448581-21449168  | 588  | 17 | 4.53E-02 | 8.86  | -1.57 | 4.69E-03 |
| NLGN1    | neuroligin 1                                                                     | chr3:174596786-174597597 | 812  | 22 | 4.19E-02 | 9.07  | -2.24 | 1.94E-04 |
| NOLA3    | nucleolar protein family A, member 3 (H/ACA small nucleolar RNPs)                | chr15:32428549-32429144  | 596  | 11 | 4.03E-02 | 9.18  | -1.29 | 1.39E-02 |
| NPTX1    | neuronal pentraxin I                                                             | chr17:76063261-76063975  | 715  | 21 | 3.16E-02 | 9.81  | -1.57 | 2.88E-02 |
| NRBP2    | nuclear receptor binding protein 2                                               | chr8:144975741-144976440 | 700  | 20 | 4.28E-02 | 9.01  | -1.36 | 4.13E-02 |
| NTAN1    | N-terminal asparagine amidase                                                    | chr16:15057646-15058360  | 715  | 13 | 2.96E-02 | 10.00 | -1.33 | 6.84E-03 |
| NTS      | neurotensin                                                                      | chr12:84785307-84785959  | 653  | 15 | 4.84E-02 | 8.68  | 1.85  | 3.33E-04 |
| NUBPL    | nucleotide binding protein-like                                                  | chr14:31100312-31100984  | 673  | 20 | 3.68E-02 | 9.41  | 1.37  | 2.14E-03 |
| NUP62    | nucleoporin 62kDa                                                                | chr19:55104196-55105310  | 1115 | 31 | 3.80E-03 | 16.01 | -1.22 | 4.24E-02 |
| NUPL1    | nucleoporin like 1                                                               | chr13:24772560-24773277  | 718  | 21 | 2.68E-02 | 10.28 | -2.14 | 2.10E-02 |

|           |                                                                                      |                           |      |    |          |       |       |          |
|-----------|--------------------------------------------------------------------------------------|---------------------------|------|----|----------|-------|-------|----------|
| NY-SAR-48 | sarcoma antigen NY-SAR-48                                                            | chr19:17051260-17052031   | 772  | 23 | 1.41E-02 | 12.07 | -1.28 | 3.40E-02 |
| P53AIP1   | p53-regulated apoptosis-inducing protein 1                                           | chr11:128313396-128314982 | 1587 | 39 | 2.55E-02 | 10.42 | -1.26 | 3.88E-02 |
| PACS2     | phosphofurin acidic cluster sorting protein 2                                        | chr14:104955252-104956344 | 1093 | 31 | 4.22E-02 | 9.05  | -1.25 | 1.99E-02 |
| PAIP1     | poly(A) binding protein interacting protein 1                                        | chr5:43593177-43593578    | 402  | 11 | 2.98E-02 | 9.98  | -1.39 | 6.95E-03 |
| PALLD     | palladin, cytoskeletal associated protein                                            | chr4:169652048-169652657  | 610  | 18 | 3.55E-02 | 9.50  | 1.27  | 3.75E-02 |
| PAN3      | PAN3 polyA specific ribonuclease subunit homolog (S. cerevisiae)                     | chr13:27759284-27759992   | 709  | 20 | 1.44E-02 | 12.03 | -1.47 | 2.65E-03 |
| PAQR6     | progesterone and adiponectin receptor family member VI                               | chr1:154487009-154487782  | 774  | 21 | 2.04E-02 | 11.09 | -1.18 | 3.29E-02 |
| PARC      | p53-associated parkin-like cytoplasmic protein                                       | chr6:43254307-43254904    | 598  | 17 | 4.91E-02 | 8.65  | -1.44 | 4.41E-02 |
| PARG      | poly (ADP-ribose) glycohydrolase                                                     | chr10:51040679-51041426   | 748  | 20 | 2.96E-02 | 10.00 | -1.19 | 3.93E-02 |
| PARN      | poly(A)-specific ribonuclease (deadenylation nuclease)                               | chr16:14634061-14634823   | 763  | 20 | 2.66E-02 | 10.30 | -1.41 | 2.28E-03 |
| PASK      | PAS domain containing serine/threonine kinase                                        | chr2:241696676-241697459  | 784  | 19 | 2.84E-02 | 10.13 | -1.46 | 2.98E-03 |
| PBX2      | pre-B-cell leukemia homeobox 2                                                       | chr6:32267659-32268304    | 646  | 18 | 4.34E-02 | 8.98  | -1.34 | 3.79E-02 |
| PBXIP1    | pre-B-cell leukemia homeobox interacting protein 1                                   | chr1:153180437-153181227  | 791  | 23 | 2.00E-02 | 11.13 | 1.37  | 4.43E-04 |
| PCDHGA4   | protocadherin gamma subfamily A, 4                                                   | chr5:140836142-140836762  | 621  | 18 | 2.60E-02 | 10.36 | -1.21 | 1.40E-02 |
| PCGF2     | polycomb group ring finger 2                                                         | chr17:34149858-34150241   | 384  | 11 | 3.79E-02 | 9.34  | -1.64 | 2.26E-03 |
| PDCD6     | programmed cell death 6                                                              | chr5:496137-497075        | 939  | 23 | 3.82E-02 | 9.32  | -1.60 | 5.01E-03 |
| PDE4A     | phosphodiesterase 4A, cAMP-specific (phosphodiesterase E2 dunce homolog, Drosophila) | chr19:10422186-10423026   | 841  | 24 | 2.82E-02 | 10.15 | -1.45 | 2.49E-02 |
| PDLIM7    | PDZ and LIM domain 7 (enigma)                                                        | chr5:176856106-176856845  | 740  | 20 | 2.58E-02 | 10.39 | -1.42 | 4.21E-02 |
| PDXK      | pyridoxal (pyridoxine, vitamin B6) kinase                                            | chr21:43975767-43976452   | 686  | 19 | 1.93E-02 | 11.24 | -1.48 | 2.46E-03 |
| PER2      | period homolog 2 (Drosophila)                                                        | chr2:238805772-238806708  | 937  | 27 | 1.61E-02 | 11.73 | -1.57 | 7.51E-03 |
| PGPEP1    | pyroglutamyl-peptidase I                                                             | chr19:18335500-18336115   | 616  | 15 | 1.80E-02 | 11.44 | -1.34 | 9.50E-03 |
| PHB2      | prohibitin 2                                                                         | chr12:6955515-6955847     | 333  | 10 | 4.72E-02 | 8.75  | -1.39 | 2.73E-03 |
| PHF15     | PHD finger protein 15                                                                | chr5:133886247-133886960  | 714  | 17 | 4.19E-02 | 9.06  | -1.34 | 4.57E-02 |
| PHF19     | PHD finger protein 19                                                                | chr9:122679739-122680405  | 667  | 19 | 4.16E-02 | 9.08  | -1.32 | 2.00E-02 |
| PI4KA     | phosphatidylinositol 4-kinase, catalytic, alpha                                      | chr22:19420189-19421470   | 1282 | 36 | 1.99E-02 | 11.15 | -1.24 | 4.83E-02 |
| PITPNB    | phosphatidylinositol transfer protein, beta                                          | chr22:26530651-26531809   | 1159 | 29 | 1.19E-02 | 12.54 | -1.14 | 3.90E-02 |
| PKIB      | protein kinase (cAMP-dependent, catalytic) inhibitor beta                            | chr6:122968010-122968655  | 646  | 18 | 2.83E-02 | 10.14 | -1.24 | 4.96E-02 |

|          |                                                                                  |                          |      |    |          |       |       |          |
|----------|----------------------------------------------------------------------------------|--------------------------|------|----|----------|-------|-------|----------|
| PKLR     | pyruvate kinase, liver and RBC                                                   | chr1:153544954-153545760 | 807  | 24 | 8.72E-03 | 13.55 | 1.27  | 1.76E-02 |
| PKN2     | protein kinase N2                                                                | chr1:88921921-88922569   | 649  | 17 | 1.87E-02 | 11.34 | 1.37  | 1.88E-03 |
| PLEKHA8  | pleckstrin homology domain containing, family A (phosphoinositide binding specif | chr7:30029353-30029697   | 345  | 10 | 3.56E-02 | 9.50  | -1.28 | 3.89E-02 |
| PLEKHJ1  | pleckstrin homology domain containing, family J member 1                         | chr19:2192702-2193213    | 512  | 14 | 3.98E-02 | 9.21  | -1.25 | 2.16E-02 |
| PLEKHM1  | pleckstrin homology domain containing, family M (with RUN domain) member 1       | chr17:40863963-40864831  | 869  | 24 | 9.97E-03 | 13.10 | -1.42 | 1.33E-03 |
| PLXNA2   | plexin A2                                                                        | chr1:206269955-206270571 | 617  | 18 | 4.67E-02 | 8.77  | -1.34 | 2.69E-02 |
| PMEPA1   | prostate transmembrane protein, androgen induced 1                               | chr20:55632837-55633711  | 875  | 18 | 2.46E-02 | 10.52 | 1.20  | 4.89E-02 |
| PMF1     | polyamine-modulated factor 1                                                     | chr1:154480125-154480743 | 619  | 17 | 4.51E-02 | 8.87  | -1.23 | 4.99E-02 |
| PMP22    | peripheral myelin protein 22                                                     | chr17:15106972-15107576  | 605  | 16 | 4.18E-02 | 9.07  | 1.32  | 6.97E-03 |
| PMS1     | PMS1 postmeiotic segregation increased 1 (S. cerevisiae)                         | chr2:190352357-190352799 | 443  | 13 | 2.59E-02 | 10.37 | -1.21 | 8.21E-03 |
| POLD1    | polymerase (DNA directed), delta 1, catalytic subunit 125kDa                     | chr19:55612791-55613421  | 631  | 17 | 1.25E-02 | 12.42 | -1.24 | 1.66E-02 |
| POMT2    | protein-O-mannosyltransferase 2                                                  | chr14:76858171-76858810  | 640  | 18 | 3.42E-02 | 9.60  | -1.35 | 1.80E-03 |
| PPM1G    | protein phosphatase 1G (formerly 2C), magnesium-dependent, gamma isoform         | chr2:27454708-27455594   | 887  | 25 | 1.40E-02 | 12.11 | -1.23 | 4.46E-02 |
| PPP1R16A | protein phosphatase 1, regulatory (inhibitor) subunit 16A                        | chr8:145689073-145690100 | 1028 | 29 | 9.03E-03 | 13.43 | -1.38 | 4.41E-02 |
| PPP1R1A  | protein phosphatase 1, regulatory (inhibitor) subunit 1A                         | chr12:53267161-53267937  | 777  | 22 | 2.80E-02 | 10.17 | 1.38  | 2.00E-02 |
| PPP1R7   | protein phosphatase 1, regulatory (inhibitor) subunit 7                          | chr2:241773955-241774416 | 462  | 13 | 1.89E-02 | 11.31 | -1.30 | 3.54E-03 |
| PPP3CB   | protein phosphatase 3 (formerly 2B), catalytic subunit, beta isoform             | chr10:74861293-74861781  | 489  | 14 | 4.98E-02 | 8.61  | -1.15 | 1.05E-03 |
| PRB4     | proline-rich protein BstNI subfamily 4                                           | chr12:11315987-11316653  | 667  | 17 | 1.70E-02 | 11.59 | -1.23 | 8.86E-03 |
| PRKX     | protein kinase, X-linked                                                         | chrX:3643072-3643939     | 868  | 25 | 2.88E-02 | 10.09 | -1.37 | 3.83E-02 |
| PRR3     | proline rich 3                                                                   | chr6:30647281-30647924   | 644  | 18 | 4.24E-02 | 9.04  | -1.25 | 2.58E-02 |
| PSD4     | pleckstrin and Sec7 domain containing 4                                          | chr2:113656853-113657470 | 618  | 17 | 4.58E-02 | 8.82  | -1.27 | 3.15E-02 |
| PSG6     | pregnancy specific beta-1-glycoprotein 6                                         | chr19:47936219-47936932  | 714  | 19 | 1.12E-02 | 12.74 | -1.24 | 4.19E-02 |
| PSMF1    | proteasome (prosome, macropain) inhibitor subunit 1 (PI31)                       | chr20:1042710-1043933    | 1224 | 26 | 7.34E-03 | 14.06 | -1.34 | 3.34E-03 |

|           |                                                                                    |                           |      |    |          |       |       |          |
|-----------|------------------------------------------------------------------------------------|---------------------------|------|----|----------|-------|-------|----------|
| PTPN9     | protein tyrosine phosphatase, non-receptor type 9                                  | chr15:73658034-73658643   | 610  | 17 | 4.35E-02 | 8.97  | -1.34 | 1.07E-02 |
| PUS1      | pseudouridylate synthase 1                                                         | chr12:130972616-130973331 | 716  | 19 | 2.09E-02 | 10.99 | -1.43 | 3.90E-03 |
| RAB11FIP1 | RAB11 family interacting protein 1 (class I)                                       | chr8:37880028-37880658    | 631  | 18 | 2.34E-02 | 10.67 | -1.33 | 3.44E-02 |
| RABL2A    | RAB, member of RAS oncogene family-like 2B                                         | chr2:114067514-114068154  | 641  | 18 | 6.79E-03 | 14.32 | -1.76 | 2.71E-03 |
| RBM34     | RNA binding motif protein 34                                                       | chr1:233561217-233561978  | 762  | 22 | 2.33E-02 | 10.68 | -1.30 | 6.19E-03 |
| RBMX      | RNA binding motif protein, X-linked                                                | chr1:89231135-89231729    | 595  | 17 | 8.77E-03 | 13.52 | -1.43 | 2.54E-03 |
| RET       | ret proto-oncogene                                                                 | chr10:42882970-42883618   | 649  | 19 | 4.02E-02 | 9.19  | -1.32 | 2.08E-02 |
| RIC8B     | resistance to inhibitors of cholinesterase 8 homolog B ( <i>C. elegans</i> )       | chr12:105690731-105691825 | 1095 | 21 | 2.48E-02 | 10.50 | -1.23 | 1.30E-02 |
| RIMS3     | regulating synaptic membrane exocytosis 3                                          | chr1:40906955-40907620    | 666  | 13 | 4.22E-02 | 9.05  | 1.28  | 2.11E-02 |
| RNF130    | ring finger protein 130                                                            | chr5:179429330-179430298  | 969  | 28 | 1.45E-02 | 12.01 | -1.24 | 1.03E-02 |
| RNF4      | ring finger protein 4                                                              | chr4:2434247-2434858      | 612  | 11 | 4.18E-02 | 9.08  | -1.22 | 4.53E-02 |
| ROGDI     | rogdi homolog ( <i>Drosophila</i> )                                                | chr16:4791708-4792452     | 745  | 16 | 2.06E-02 | 11.05 | -1.34 | 5.73E-03 |
| RPH3AL    | rabphilin 3A-like (without C2 domains)                                             | chr17:205518-206383       | 866  | 24 | 2.35E-02 | 10.65 | -1.37 | 2.19E-02 |
| RPL23AP7  | ribosomal protein L23a pseudogene 7                                                | chr2:114107786-114108391  | 606  | 18 | 1.18E-02 | 12.56 | 1.14  | 3.74E-02 |
| RRAD      | Ras-related associated with diabetes                                               | chr16:65511887-65512495   | 609  | 13 | 4.84E-02 | 8.69  | 1.09  | 3.57E-02 |
| RTKN2     | rhotekin 2                                                                         | chr10:63700883-63701519   | 637  | 15 | 3.33E-02 | 9.69  | -1.25 | 2.96E-02 |
| RUSC1     | RUN and SH3 domain containing 1                                                    | chr1:153544954-153545760  | 807  | 24 | 8.72E-03 | 13.55 | -1.22 | 2.29E-02 |
| S100A2    | S100 calcium binding protein A2                                                    | chr1:151805027-151805620  | 594  | 17 | 4.36E-02 | 8.97  | -1.28 | 1.31E-02 |
| S100A6    | S100 calcium binding protein A6                                                    | chr1:151780267-151780901  | 635  | 18 | 3.67E-02 | 9.42  | -1.24 | 2.54E-02 |
| SC5DL     | sterol-C5-desaturase (ERG3 delta-5-desaturase homolog, <i>S. cerevisiae</i> )-like | chr11:120671784-120672676 | 893  | 22 | 1.19E-02 | 12.54 | 1.23  | 8.51E-03 |
| SCAMP2    | secretory carrier membrane protein 2                                               | chr15:72927060-72927436   | 377  | 11 | 4.54E-02 | 8.85  | -1.40 | 3.79E-03 |
| SCUBE3    | signal peptide, CUB domain, EGF-like 3                                             | chr6:35283668-35284284    | 617  | 13 | 4.87E-02 | 8.66  | 1.15  | 3.36E-02 |
| SEP6      | septin 6                                                                           | chrX:118710317-118711084  | 768  | 21 | 3.70E-02 | 9.39  | -1.20 | 3.96E-02 |
| SEC24C    | SEC24 related gene family, member C ( <i>S. cerevisiae</i> )                       | chr10:75211361-75211997   | 637  | 18 | 4.27E-02 | 9.02  | -1.36 | 8.40E-03 |
| SEC31A    | SEC31 homolog A ( <i>S. cerevisiae</i> )                                           | chr4:84038500-84038897    | 398  | 12 | 4.16E-02 | 9.09  | -1.49 | 1.78E-02 |
| SEPN1     | selenoprotein N, 1                                                                 | chr1:25998481-25999536    | 1056 | 23 | 2.08E-02 | 11.01 | -1.65 | 2.62E-02 |
| SERPINC1  | serpin peptidase inhibitor, clade C (antithrombin), member 1                       | chr1:172150579-172151126  | 548  | 16 | 1.15E-02 | 12.64 | -1.09 | 4.97E-02 |

|          |                                                                                  |                           |      |    |          |       |       |          |
|----------|----------------------------------------------------------------------------------|---------------------------|------|----|----------|-------|-------|----------|
| SERPINF1 | serpin peptidase inhibitor, clade F (alpha-2 antiplasmin, pigment epithelium der | chr17:1617045-1617673     | 629  | 13 | 2.43E-02 | 10.55 | 1.79  | 1.76E-02 |
| SFXN5    | sideroflexin 5                                                                   | chr2:73155884-73156529    | 646  | 17 | 4.11E-02 | 9.12  | -1.27 | 7.84E-03 |
| SH3GL3   | SH3-domain GRB2-like 3                                                           | chr15:81906637-81907723   | 1087 | 30 | 1.35E-02 | 12.21 | -1.26 | 1.96E-02 |
| SHKBP1   | SH3KBP1 binding protein 1                                                        | chr19:45775297-45776450   | 1154 | 25 | 2.63E-02 | 10.33 | -1.37 | 1.26E-02 |
| SLC11A1  | solute carrier family 11 (proton-coupled divalent metal ion transporters), membe | chr2:218912808-218913629  | 822  | 18 | 2.27E-02 | 10.74 | -1.11 | 1.50E-02 |
| SLC18A2  | solute carrier family 18 (vesicular monoamine), member 2                         | chr10:118990614-118991611 | 998  | 28 | 1.95E-02 | 11.21 | 1.47  | 4.31E-02 |
| SLC25A29 | solute carrier family 25, member 29                                              | chr14:99840206-99840823   | 618  | 14 | 4.26E-02 | 9.03  | -1.38 | 3.23E-02 |
| SLC35C2  | solute carrier family 35, member C2                                              | chr20:44418389-44419073   | 685  | 19 | 2.36E-02 | 10.65 | -1.18 | 3.34E-02 |
| SLC39A7  | solute carrier family 39 (zinc transporter), member 7                            | chr6:33282072-33283030    | 959  | 27 | 1.25E-02 | 12.42 | 1.16  | 4.88E-02 |
| SLC47A1  | solute carrier family 47, member 1                                               | chr17:19378654-19379036   | 383  | 11 | 3.87E-02 | 9.29  | -1.74 | 1.92E-02 |
| SLC47A2  | solute carrier family 47, member 2                                               | chr17:19586597-19587223   | 627  | 18 | 1.78E-02 | 11.47 | -1.17 | 3.39E-02 |
| SMAD4    | SMAD family member 4                                                             | chr18:46825439-46825879   | 441  | 13 | 2.25E-02 | 10.77 | -1.23 | 4.19E-02 |
| SMARCB1  | SWI/SNF related, matrix associated, actin dependent regulator of chromatin, subf | chr22:22454226-22455278   | 1053 | 22 | 2.61E-02 | 10.36 | -1.38 | 1.37E-02 |
| SMG5     | Smg-5 homolog, nonsense mediated mRNA decay factor (C. elegans)                  | chr1:154487009-154487782  | 774  | 21 | 2.04E-02 | 11.09 | -1.25 | 3.50E-02 |
| SNAP29   | synaptosomal-associated protein, 29kDa                                           | chr22:19536882-19538018   | 1137 | 28 | 3.04E-02 | 9.94  | 1.14  | 3.60E-02 |
| SNAPC4   | small nuclear RNA activating complex, polypeptide 4, 190kDa                      | chr9:138390303-138391225  | 923  | 25 | 2.05E-02 | 11.07 | -1.23 | 4.39E-02 |
| SOLH     | small optic lobes homolog (Drosophila)                                           | chr16:513148-513704       | 557  | 16 | 1.75E-02 | 11.52 | -1.19 | 5.34E-03 |
| SPAG9    | sperm associated antigen 9                                                       | chr17:46554359-46554974   | 616  | 17 | 2.99E-02 | 9.97  | 1.28  | 8.87E-06 |
| SPPL2A   | signal peptide peptidase-like 2A                                                 | chr15:48847262-48847740   | 479  | 14 | 4.67E-02 | 8.77  | 1.60  | 2.24E-04 |
| SPRR2B   | small proline-rich protein 2B                                                    | chr1:151283148-151283966  | 819  | 20 | 6.85E-03 | 14.29 | -1.21 | 2.90E-02 |
| SPTLC2   | serine palmitoyltransferase, long chain base subunit 2                           | chr14:77151995-77152873   | 879  | 24 | 3.71E-02 | 9.38  | 1.32  | 3.46E-02 |
| SRF      | serum response factor (c-fos serum response element-binding transcription factor | chr6:43254307-43254904    | 598  | 17 | 4.91E-02 | 8.65  | -1.35 | 1.22E-02 |
| SS18L1   | synovial sarcoma translocation gene on chromosome 18-like 1                      | chr20:60199335-60200021   | 687  | 14 | 3.40E-02 | 9.62  | -1.30 | 2.54E-02 |
| SSH2     | slingshot homolog 2 (Drosophila)                                                 | chr17:24971940-24972524   | 585  | 16 | 3.41E-02 | 9.61  | 1.37  | 2.47E-02 |

|         |                                                                                  |                           |      |    |          |       |       |          |
|---------|----------------------------------------------------------------------------------|---------------------------|------|----|----------|-------|-------|----------|
| SSNA1   | Sjogren syndrome nuclear autoantigen 1                                           | chr9:139198410-139199135  | 726  | 16 | 3.27E-03 | 16.48 | -1.25 | 4.62E-02 |
| ST13    | suppression of tumorigenicity 13 (colon carcinoma) (Hsp70 interacting protein)   | chr7:132416760-132417375  | 616  | 17 | 4.76E-02 | 8.73  | -1.21 | 3.74E-03 |
| STAU1   | staufen, RNA binding protein, homolog 1 (Drosophila)                             | chr19:15431622-15432188   | 567  | 17 | 2.30E-02 | 10.71 | -1.24 | 2.39E-02 |
| STK38L  | serine/threonine kinase 38 like                                                  | chr12:27287796-27288488   | 693  | 15 | 2.91E-02 | 10.06 | 1.61  | 4.05E-02 |
| STK39   | serine threonine kinase 39 (STE20/SPS1 homolog, yeast)                           | chr2:168705880-168706465  | 586  | 10 | 4.00E-02 | 9.20  | -1.25 | 2.01E-02 |
| STRA6   | stimulated by retinoic acid gene 6 homolog (mouse)                               | chr15:72282238-72282918   | 681  | 21 | 1.59E-02 | 11.77 | -1.29 | 3.97E-02 |
| SUFU    | suppressor of fused homolog (Drosophila)                                         | chr10:104253614-104254402 | 789  | 20 | 8.47E-03 | 13.65 | -1.24 | 3.82E-02 |
| SWAP70  | SWAP-70 protein                                                                  | chr11:9642678-9643364     | 687  | 19 | 4.04E-02 | 9.17  | -2.52 | 1.17E-03 |
| TACC1   | transforming, acidic coiled-coil containing protein 1                            | chr8:38764731-38765396    | 666  | 18 | 4.16E-02 | 9.08  | 2.17  | 1.89E-04 |
| TAF11   | TAF11 RNA polymerase II, TATA box binding protein (TBP)-associated factor, 28kDa | chr6:34966439-34967042    | 604  | 17 | 4.66E-02 | 8.78  | -1.76 | 2.61E-04 |
| TAPBP   | TAP binding protein (tapasin)                                                    | chr6:33364418-33365021    | 604  | 17 | 3.91E-02 | 9.25  | -1.45 | 2.19E-02 |
| TAPT1   | transmembrane anterior posterior transformation 1                                | chr4:15836795-15837381    | 587  | 11 | 4.86E-02 | 8.67  | 1.19  | 1.51E-02 |
| TBC1D9B | TBC1 domain family, member 9B (with GRAM domain)                                 | chr5:179230943-179231655  | 713  | 19 | 2.74E-02 | 10.22 | -1.15 | 3.64E-02 |
| TGFB111 | transforming growth factor beta 1 induced transcript 1                           | chr16:31399465-31400083   | 619  | 18 | 3.59E-02 | 9.47  | -1.24 | 1.26E-02 |
| TIMM22  | translocase of inner mitochondrial membrane 22 homolog (yeast)                   | chr17:842885-843759       | 875  | 25 | 9.67E-05 | 26.97 | -1.37 | 3.06E-03 |
| TINF2   | TERF1 (TRF1)-interacting nuclear factor 2                                        | chr14:23770763-23771413   | 651  | 18 | 3.38E-02 | 9.65  | -1.25 | 2.06E-02 |
| TK1     | thymidine kinase 1, soluble                                                      | chr17:73698536-73699085   | 550  | 16 | 4.05E-02 | 9.16  | 1.61  | 1.17E-02 |
| TLN1    | talin 1                                                                          | chr9:35717827-35718943    | 1117 | 32 | 2.04E-02 | 11.08 | -1.37 | 1.08E-03 |
| TMBIM1  | transmembrane BAX inhibitor motif containing 1                                   | chr2:218848629-218849264  | 636  | 18 | 2.69E-02 | 10.27 | 1.28  | 3.84E-02 |
| TMCO3   | transmembrane and coiled-coil domains 3                                          | chr13:113186325-113186964 | 640  | 18 | 3.67E-02 | 9.42  | 1.24  | 1.93E-02 |
| TMED9   | transmembrane emp24 protein transport domain containing 9                        | chr5:176951293-176951960  | 668  | 15 | 4.26E-02 | 9.03  | 1.26  | 2.47E-02 |
| TMEM173 | transmembrane protein 173                                                        | chr5:138841211-138842141  | 931  | 25 | 1.87E-02 | 11.34 | -1.51 | 1.12E-02 |
| TMEM65  | transmembrane protein 65                                                         | chr8:125457617-125458344  | 728  | 21 | 2.41E-02 | 10.58 | 1.52  | 3.18E-03 |
| TMEM97  | transmembrane protein 97                                                         | chr17:23667778-23668371   | 594  | 16 | 2.74E-02 | 10.22 | -1.24 | 2.63E-02 |



|         |                                                                    |                           |      |    |          |       |       |          |
|---------|--------------------------------------------------------------------|---------------------------|------|----|----------|-------|-------|----------|
| TNFAIP1 | tumor necrosis factor, alpha-induced protein 1 (endothelial)       | chr17:23682629-23683276   | 648  | 19 | 3.82E-02 | 9.31  | -1.24 | 2.26E-02 |
| TNIK    | TRAF2 and NCK interacting kinase                                   | chr3:172660066-172661004  | 939  | 26 | 1.09E-02 | 12.81 | -1.30 | 2.32E-02 |
| TOM1L2  | target of myb1-like 2 (chicken)                                    | chr17:17686351-17686891   | 541  | 10 | 4.16E-02 | 9.09  | -1.35 | 3.38E-03 |
| TOP1MT  | topoisomerase (DNA) I, mitochondrial                               | chr8:144493117-144494071  | 955  | 28 | 3.87E-04 | 23.17 | -1.35 | 3.92E-02 |
| TOP3A   | topoisomerase (DNA) III alpha                                      | chr17:18161093-18161866   | 774  | 22 | 2.31E-02 | 10.70 | -1.31 | 3.81E-02 |
| TPM3    | tropomyosin 3                                                      | chr1:152437989-152438670  | 682  | 20 | 2.87E-02 | 10.09 | -1.43 | 1.24E-02 |
| TRAF7   | TNF receptor-associated factor 7                                   | chr16:2153924-2155961     | 2038 | 41 | 1.35E-02 | 12.22 | -1.34 | 2.18E-02 |
| TRIP13  | thyroid hormone receptor interactor 13                             | chr5:935878-936321        | 444  | 13 | 2.03E-02 | 11.09 | -1.53 | 4.26E-03 |
| TRPV2   | transient receptor potential cation channel, subfamily V, member 2 | chr17:16225806-16226766   | 961  | 27 | 2.91E-03 | 16.86 | 1.22  | 5.83E-03 |
| TSC2    | tuberous sclerosis 2                                               | chr16:2033822-2034521     | 700  | 19 | 4.06E-02 | 9.16  | -1.31 | 1.19E-02 |
| TSPAN9  | tetraspanin 9                                                      | chr12:3061426-3062099     | 674  | 19 | 1.74E-02 | 11.53 | 1.12  | 3.51E-02 |
| TST     | thiosulfate sulfurtransferase (rhodanese)                          | chr22:35751118-35751864   | 747  | 19 | 1.86E-02 | 11.35 | -1.50 | 1.22E-02 |
| TTLL4   | tubulin tyrosine ligase-like family, member 4                      | chr2:219276437-219277053  | 617  | 18 | 4.83E-02 | 8.69  | -1.16 | 1.35E-02 |
| TYSND1  | trypsin domain containing 1                                        | chr10:71555676-71556508   | 833  | 21 | 4.13E-03 | 15.76 | -1.47 | 5.31E-03 |
| UBTF    | upstream binding transcription factor, RNA polymerase I            | chr17:39653911-39654711   | 801  | 21 | 4.30E-02 | 9.01  | -1.44 | 2.49E-03 |
| ULK1    | unc-51-like kinase 1 (C. elegans)                                  | chr12:130972616-130973331 | 716  | 19 | 2.09E-02 | 10.99 | -1.29 | 3.39E-02 |
| UNKL    | unkempt homolog (Drosophila)-like                                  | chr16:1423178-1424111     | 934  | 26 | 2.01E-02 | 11.12 | 1.59  | 1.46E-02 |
| USP22   | ubiquitin specific peptidase 22                                    | chr17:19586597-19587223   | 627  | 18 | 1.78E-02 | 11.47 | -1.21 | 2.56E-02 |
| USP32   | ubiquitin specific peptidase 32                                    | chr17:4972856-4974634     | 1779 | 43 | 5.06E-03 | 15.13 | 1.32  | 3.15E-02 |
| USP36   | Ubiquitin specific peptidase 36                                    | chr17:74347504-74348321   | 818  | 22 | 9.10E-03 | 13.41 | -1.45 | 2.41E-03 |
| USP6    | ubiquitin specific peptidase 6 (Tre-2 oncogene)                    | chr17:4972856-4974634     | 1779 | 43 | 5.06E-03 | 15.13 | 1.30  | 6.05E-03 |
| UXT     | ubiquitously-expressed transcript                                  | chrX:47379659-47380243    | 585  | 14 | 4.84E-02 | 8.68  | -1.27 | 8.27E-03 |
| VAC14   | Vac14                                                              | chr16:69391591-69392483   | 893  | 19 | 2.50E-02 | 10.49 | -1.22 | 5.17E-03 |
| VANGL1  | vang-like 1 (van gogh, Drosophila)                                 | chr1:115992088-115992703  | 616  | 17 | 2.06E-02 | 11.05 | -1.81 | 2.75E-03 |
| VEGFB   | vascular endothelial growth factor B                               | chr11:63766169-63766785   | 617  | 14 | 4.52E-02 | 8.86  | -1.26 | 5.04E-03 |
| VIL1    | villin 1                                                           | chr2:218912808-218913629  | 822  | 18 | 2.27E-02 | 10.74 | 1.07  | 2.47E-02 |
| VPS36   | vacuolar protein sorting 36 homolog (S. cerevisiae)                | chr13:51877880-51878511   | 632  | 16 | 3.59E-02 | 9.47  | -1.50 | 2.30E-03 |
| VPS39   | vacuolar protein sorting 39 homolog (S.                            | chr15:40238358-40239008   | 651  | 18 | 2.52E-02 | 10.46 | -1.46 | 1.96E-03 |

|         |                                                     |                          |      |    |          |       |       |          |  |
|---------|-----------------------------------------------------|--------------------------|------|----|----------|-------|-------|----------|--|
|         | cerevisiae)                                         |                          |      |    |          |       |       |          |  |
| VPS53   | vacuolar protein sorting 53 homolog (S. cerevisiae) | chr17:570253-571431      | 1179 | 31 | 4.32E-03 | 15.62 | -1.16 | 3.03E-03 |  |
| VWA3B   | von Willebrand factor A domain containing 3B        | chr2:98223803-98224721   | 919  | 26 | 2.89E-02 | 10.07 | -1.12 | 2.94E-02 |  |
| WDFY3   | WD repeat and FYVE domain containing 3              | chr4:85824461-85825032   | 572  | 16 | 4.54E-02 | 8.85  | 1.26  | 4.62E-02 |  |
| WDR40A  | WD repeat domain 40A                                | chr9:34123161-34124296   | 1136 | 28 | 4.46E-03 | 15.53 | -2.29 | 3.12E-05 |  |
| WDR90   | WD repeat domain 90                                 | chr16:668843-669823      | 981  | 28 | 2.85E-02 | 10.12 | -1.32 | 5.00E-02 |  |
| WHSC1L1 | Wolf-Hirschhorn syndrome candidate 1-like 1         | chr8:38252033-38252654   | 622  | 17 | 1.52E-02 | 11.87 | 1.19  | 3.65E-02 |  |
| WWC3    | WWC family member 3                                 | chrX:9937799-9938561     | 763  | 22 | 3.25E-02 | 9.76  | -1.49 | 3.87E-02 |  |
| YPEL3   | yippee-like 3 (Drosophila)                          | chr16:30010897-30011606  | 710  | 21 | 2.57E-02 | 10.40 | 1.49  | 1.00E-02 |  |
| YRDC    | yrnC domain containing (E. coli)                    | chr1:38043540-38044329   | 790  | 21 | 2.95E-02 | 10.02 | -1.24 | 3.07E-02 |  |
| ZBTB46  | zinc finger and BTB domain containing 46            | chr20:61939064-61939688  | 625  | 18 | 1.31E-02 | 12.30 | -1.22 | 2.52E-02 |  |
| ZCCHC11 | zinc finger, CCHC domain containing 11              | chr1:52791972-52792951   | 980  | 21 | 1.43E-02 | 12.04 | -1.22 | 3.74E-02 |  |
| ZFP62   | zinc finger protein 62 homolog (mouse)              | chr5:180166655-180167242 | 588  | 17 | 4.13E-02 | 9.11  | -1.28 | 1.06E-02 |  |
| ZFYVE20 | zinc finger, FYVE domain containing 20              | chr3:15114623-15115664   | 1042 | 26 | 1.89E-02 | 11.29 | 1.17  | 4.75E-02 |  |
| ZMYM6   | zinc finger, MYM-type 6                             | chr1:35221821-35222627   | 807  | 22 | 6.82E-03 | 14.30 | -1.28 | 2.38E-02 |  |
| ZMYND19 | zinc finger, MYND-type containing 19                | chr9:139600149-139600529 | 381  | 12 | 3.33E-02 | 9.68  | -1.39 | 3.75E-03 |  |
| ZNF14   | zinc finger protein 14                              | chr19:19710590-19711211  | 622  | 15 | 4.95E-02 | 8.63  | -1.26 | 3.47E-02 |  |
| ZNF17   | zinc finger protein 17                              | chr19:62560067-62560690  | 624  | 18 | 2.94E-02 | 10.03 | -1.32 | 1.40E-02 |  |
| ZNF179  | zinc finger protein 179                             | chr17:19257280-19257644  | 365  | 11 | 4.60E-02 | 8.82  | -1.12 | 4.15E-02 |  |
| ZNF195  | zinc finger protein 195                             | chr11:3361858-3362874    | 1017 | 29 | 1.76E-05 | 33.10 | -1.24 | 2.48E-02 |  |
| ZNF22   | zinc finger protein 22 (KOX 15)                     | chr10:44811437-44812134  | 698  | 20 | 2.89E-02 | 10.07 | 1.17  | 2.89E-02 |  |
| ZNF341  | zinc finger protein 341                             | chr20:31779141-31779703  | 563  | 12 | 1.04E-02 | 12.96 | -1.38 | 3.94E-02 |  |
| ZNF367  | zinc finger protein 367                             | chr9:98187198-98187787   | 590  | 17 | 4.57E-02 | 8.83  | -1.28 | 2.74E-02 |  |
| ZNF497  | zinc finger protein 497                             | chr19:63571478-63573071  | 1594 | 45 | 5.52E-03 | 14.87 | -1.27 | 3.85E-03 |  |
| ZNF512  | zinc finger protein 512                             | chr2:27659376-27660055   | 680  | 19 | 3.31E-02 | 9.71  | -1.70 | 3.70E-04 |  |
| ZNF569  | zinc finger protein 569                             | chr19:42655543-42656153  | 611  | 17 | 4.36E-02 | 8.97  | -1.22 | 4.83E-02 |  |
| ZNF618  | zinc finger protein 618                             | chr9:115853382-115854466 | 1085 | 30 | 1.39E-02 | 12.14 | -1.42 | 2.62E-02 |  |
| ZNF701  | zinc finger protein 701                             | chr19:57748937-57749582  | 646  | 18 | 2.84E-02 | 10.13 | -1.22 | 3.10E-02 |  |
| ZNF76   | zinc finger protein 76 (expressed in testis)        | chr6:35368367-35368985   | 619  | 17 | 4.65E-02 | 8.78  | -1.32 | 2.31E-03 |  |
| ZSWIM3  | zinc finger, SWIM-type containing 3                 | chr20:43949291-43949833  | 543  | 16 | 3.72E-02 | 9.38  | -1.32 | 1.73E-03 |  |

**Table 21** KEGG pathways of significant differentially expressed genes (p-value < 0.05) with ChIP-on-CHIP binding sites  
(MAT score p-value < 0.05) (\* significant corrected gamma p-value < 0.05, DAVID functional annotation)

| <b>KEGG pathway name</b>                   | <b>p-value</b> | <b>Fold enrichment</b> |
|--------------------------------------------|----------------|------------------------|
| Thyroid cancer*                            | 5.73E-03       | 10.58                  |
| MAPK signaling pathway*                    | 2.41E-02       | 2.48                   |
| Focal adhesion                             | 1.37E-01       | 2.15                   |
| GnRH signaling pathway                     | 1.38E-01       | 3.04                   |
| mTOR signaling pathway                     | 1.55E-01       | 4.20                   |
| Arachidonic acid metabolism                | 1.75E-01       | 3.90                   |
| Basal cell carcinoma                       | 1.80E-01       | 3.83                   |
| Hedgehog signaling pathway                 | 1.85E-01       | 3.76                   |
| Heparan sulfate biosynthesis               | 2.53E-01       | 6.80                   |
| Nicotinate and nicotinamide metabolism     | 2.84E-01       | 5.95                   |
| Apoptosis                                  | 3.22E-01       | 2.55                   |
| Alzheimer's disease                        | 3.22E-01       | 5.10                   |
| Small cell lung cancer                     | 3.38E-01       | 2.46                   |
| Regulation of actin cytoskeleton           | 3.40E-01       | 1.67                   |
| Wnt signaling pathway                      | 3.45E-01       | 1.89                   |
| Propanoate metabolism                      | 3.77E-01       | 4.20                   |
| Melanogenesis                              | 3.93E-01       | 2.19                   |
| Glutathione metabolism                     | 4.19E-01       | 3.66                   |
| Bladder cancer                             | 4.27E-01       | 3.57                   |
| Histidine metabolism                       | 4.35E-01       | 3.48                   |
| Valine, leucine and isoleucine degradation | 4.58E-01       | 3.25                   |
| Cell cycle                                 | 4.69E-01       | 1.88                   |
| Glycerolipid metabolism                    | 5.02E-01       | 2.86                   |
| Ubiquitin mediated proteolysis             | 5.43E-01       | 1.64                   |

|                                              |          |      |
|----------------------------------------------|----------|------|
| Tyrosine metabolism                          | 5.55E-01 | 2.46 |
| Insulin signaling pathway                    | 5.56E-01 | 1.60 |
| Cell Communication                           | 5.64E-01 | 1.58 |
| Glycolysis / Gluconeogenesis                 | 5.67E-01 | 2.38 |
| p53 signaling pathway                        | 6.13E-01 | 2.10 |
| Metabolism of xenobiotics by cytochrome P450 | 6.13E-01 | 2.10 |
| Pancreatic cancer                            | 6.40E-01 | 1.96 |
| Chronic myeloid leukemia                     | 6.45E-01 | 1.93 |
| Phosphatidylinositol signaling system        | 6.55E-01 | 1.88 |
| Antigen processing and presentation          | 6.74E-01 | 1.79 |
| Colorectal cancer                            | 6.96E-01 | 1.68 |
| ECM-receptor interaction                     | 7.08E-01 | 1.62 |
| TGF-beta signaling pathway                   | 7.17E-01 | 1.59 |
| Gap junction                                 | 7.36E-01 | 1.50 |
| Glycan structures - biosynthesis 1           | 8.15E-01 | 1.19 |
| Tight junction                               | 8.44E-01 | 1.08 |
| Axon guidance                                | 8.44E-01 | 1.08 |
| Purine metabolism                            | 8.71E-01 | 0.99 |
| Calcium signaling pathway                    | 9.15E-01 | 0.82 |
| Cytokine-cytokine receptor interaction       | 9.74E-01 | 0.56 |

---

**Table 22** KEGG pathways of significant differentially expressed genes (p-value < 0.05) with ChIP-on-CHIP binding sites

(MAT score p-value &lt; 0.05) (\* significant corrected gamma p-value &lt; 0.05, Pathway Express calculation)

| KEGG pathway name                      | Rank | Impact factor | No. genes  |          | p-value     |           |          |                 |
|----------------------------------------|------|---------------|------------|----------|-------------|-----------|----------|-----------------|
|                                        |      |               | in pathway | in input | uncorrected | corrected | gamma    | corrected gamma |
| Phosphatidylinositol signaling system* | 1    | 42.5          | 76         | 1.3      | 8.34E-01    | 8.34E-01  | 1.51E-17 | 1.51E-17        |
| Circadian rhythm*                      | 2    | 26.8          | 13         | 7.7      | 2.47E-01    | 2.47E-01  | 6.46E-11 | 6.46E-11        |
| Antigen processing and presentation*   | 3    | 25.9          | 89         | 5.6      | 3.72E-02    | 3.72E-02  | 1.45E-10 | 1.45E-10        |
| MAPK signaling pathway*                | 4    | 6.0           | 272        | 4.0      | 4.82E-02    | 4.82E-02  | 1.72E-02 | 1.72E-02        |
| Pathways in cancer*                    | 5    | 6.0           | 330        | 3.9      | 4.39E-02    | 4.39E-02  | 1.74E-02 | 1.74E-02        |
| Basal cell carcinoma*                  | 6    | 5.9           | 55         | 5.5      | 1.31E-01    | 1.31E-01  | 1.90E-02 | 1.90E-02        |
| Gap junction*                          | 7    | 5.6           | 96         | 2.1      | 6.42E-01    | 6.42E-01  | 2.34E-02 | 2.34E-02        |
| Thyroid cancer*                        | 8    | 5.6           | 29         | 6.9      | 1.46E-01    | 1.46E-01  | 2.45E-02 | 2.45E-02        |
| Apoptosis*                             | 9    | 5.2           | 89         | 5.6      | 5.48E-02    | 5.48E-02  | 3.45E-02 | 3.45E-02        |
| Regulation of actin cytoskeleton*      | 10   | 5.1           | 217        | 2.8      | 3.53E-01    | 3.53E-01  | 3.73E-02 | 3.73E-02        |
| Small cell lung cancer*                | 11   | 4.8           | 86         | 5.8      | 5.06E-02    | 5.06E-02  | 4.60E-02 | 4.60E-02        |
| mTOR signaling pathway                 | 12   | 4.6           | 52         | 7.7      | 2.89E-02    | 2.89E-02  | 5.70E-02 | 5.70E-02        |
| Focal adhesion                         | 13   | 4.1           | 203        | 3.0      | 3.20E-01    | 3.20E-01  | 8.22E-02 | 8.22E-02        |
| Bladder cancer                         | 14   | 4.1           | 42         | 4.8      | 2.56E-01    | 2.56E-01  | 8.29E-02 | 8.29E-02        |
| Maturity onset diabetes of the young   | 15   | 4.1           | 24         | 8.3      | 8.51E-02    | 8.51E-02  | 8.56E-02 | 8.56E-02        |
| Long-term depression                   | 16   | 4.1           | 75         | 1.3      | 8.26E-01    | 8.26E-01  | 8.67E-02 | 8.67E-02        |
| Wnt signaling pathway                  | 17   | 4.0           | 152        | 3.3      | 2.68E-01    | 2.68E-01  | 9.49E-02 | 9.49E-02        |
| Complement and coagulation cascades    | 18   | 3.9           | 69         | 1.4      | 7.95E-01    | 7.95E-01  | 1.02E-01 | 1.02E-01        |
| Long-term potentiation                 | 19   | 3.5           | 73         | 4.1      | 2.30E-01    | 2.30E-01  | 1.41E-01 | 1.41E-01        |
| GnRH signaling pathway                 | 20   | 3.3           | 103        | 3.9      | 2.00E-01    | 2.00E-01  | 1.57E-01 | 1.57E-01        |
| Calcium signaling pathway              | 21   | 3.2           | 182        | 1.6      | 7.78E-01    | 7.78E-01  | 1.66E-01 | 1.66E-01        |
| Systemic lupus erythematosus           | 22   | 3.2           | 144        | 3.5      | 1.15E-01    | 1.15E-01  | 1.71E-01 | 1.71E-01        |
| Hedgehog signaling pathway             | 23   | 3.2           | 57         | 5.3      | 1.31E-01    | 1.31E-01  | 1.72E-01 | 1.72E-01        |

|                                                            |    |     |     |     |          |          |          |          |
|------------------------------------------------------------|----|-----|-----|-----|----------|----------|----------|----------|
| Axon guidance                                              | 24 | 3.1 | 129 | 2.3 | 5.77E-01 | 5.77E-01 | 1.89E-01 | 1.89E-01 |
| Colorectal cancer                                          | 25 | 3.1 | 84  | 3.6 | 3.12E-01 | 3.12E-01 | 1.91E-01 | 1.91E-01 |
| Prostate cancer                                            | 26 | 3.0 | 90  | 2.2 | 6.18E-01 | 6.18E-01 | 1.96E-01 | 1.96E-01 |
| Pancreatic cancer                                          | 27 | 3.0 | 72  | 4.2 | 2.36E-01 | 2.36E-01 | 2.01E-01 | 2.01E-01 |
| Natural killer cell mediated cytotoxicity                  | 28 | 3.0 | 135 | 1.5 | 7.99E-01 | 7.99E-01 | 2.01E-01 | 2.01E-01 |
| Homologous recombination                                   | 29 | 3.0 | 28  | 7.1 | 1.30E-01 | 1.30E-01 | 2.03E-01 | 2.03E-01 |
| B cell receptor signaling pathway                          | 30 | 3.0 | 65  | 3.1 | 4.50E-01 | 4.50E-01 | 2.05E-01 | 2.05E-01 |
| Insulin signaling pathway                                  | 31 | 2.9 | 138 | 3.6 | 2.12E-01 | 2.12E-01 | 2.19E-01 | 2.19E-01 |
| VEGF signaling pathway                                     | 32 | 2.9 | 74  | 2.7 | 5.03E-01 | 5.03E-01 | 2.23E-01 | 2.23E-01 |
| Basal transcription factors                                | 33 | 2.8 | 37  | 5.4 | 1.79E-01 | 1.79E-01 | 2.33E-01 | 2.33E-01 |
| T cell receptor signaling pathway                          | 34 | 2.7 | 108 | 1.9 | 7.16E-01 | 7.16E-01 | 2.49E-01 | 2.49E-01 |
| Chronic myeloid leukemia                                   | 35 | 2.7 | 75  | 2.7 | 5.25E-01 | 5.25E-01 | 2.51E-01 | 2.51E-01 |
| Amyotrophic lateral sclerosis (ALS)                        | 36 | 2.7 | 56  | 3.6 | 3.68E-01 | 3.68E-01 | 2.54E-01 | 2.54E-01 |
| Regulation of autophagy                                    | 37 | 2.6 | 35  | 5.7 | 1.71E-01 | 1.71E-01 | 2.59E-01 | 2.59E-01 |
| Melanoma                                                   | 38 | 2.6 | 71  | 1.4 | 8.13E-01 | 8.13E-01 | 2.60E-01 | 2.60E-01 |
| Base excision repair                                       | 39 | 2.6 | 36  | 5.6 | 1.71E-01 | 1.71E-01 | 2.60E-01 | 2.60E-01 |
| Acute myeloid leukemia                                     | 40 | 2.6 | 59  | 1.7 | 7.40E-01 | 7.40E-01 | 2.65E-01 | 2.65E-01 |
| Taste transduction                                         | 41 | 2.4 | 53  | 1.9 | 6.54E-01 | 6.54E-01 | 2.99E-01 | 2.99E-01 |
| Endometrial cancer                                         | 42 | 2.4 | 52  | 3.8 | 3.43E-01 | 3.43E-01 | 3.01E-01 | 3.01E-01 |
| Melanogenesis                                              | 43 | 2.4 | 102 | 2.9 | 4.20E-01 | 4.20E-01 | 3.10E-01 | 3.10E-01 |
| Jak-STAT signaling pathway                                 | 44 | 2.4 | 155 | 2.6 | 4.75E-01 | 4.75E-01 | 3.10E-01 | 3.10E-01 |
| ABC transporters                                           | 45 | 2.3 | 44  | 4.5 | 2.74E-01 | 2.74E-01 | 3.22E-01 | 3.22E-01 |
| Fc epsilon RI signaling pathway                            | 46 | 2.3 | 78  | 2.6 | 5.32E-01 | 5.32E-01 | 3.34E-01 | 3.34E-01 |
| Cardiac muscle contraction                                 | 47 | 2.2 | 87  | 2.3 | 5.18E-01 | 5.18E-01 | 3.49E-01 | 3.49E-01 |
| Non-small cell lung cancer                                 | 48 | 2.2 | 54  | 1.9 | 7.21E-01 | 7.21E-01 | 3.66E-01 | 3.66E-01 |
| ECM-receptor interaction                                   | 49 | 2.1 | 84  | 2.4 | 5.80E-01 | 5.80E-01 | 3.78E-01 | 3.78E-01 |
| Epithelial cell signaling in Helicobacter pylori infection | 50 | 2.1 | 68  | 1.5 | 7.99E-01 | 7.99E-01 | 3.82E-01 | 3.82E-01 |
| Tight junction                                             | 51 | 2.1 | 135 | 2.2 | 5.92E-01 | 5.92E-01 | 3.87E-01 | 3.87E-01 |

|                                           |    |     |     |     |          |          |          |          |
|-------------------------------------------|----|-----|-----|-----|----------|----------|----------|----------|
| Glioma                                    | 52 | 2.1 | 65  | 1.5 | 7.85E-01 | 7.85E-01 | 3.88E-01 | 3.88E-01 |
| Ubiquitin mediated proteolysis            | 53 | 2.0 | 138 | 2.9 | 3.60E-01 | 3.60E-01 | 4.01E-01 | 4.01E-01 |
| Autoimmune thyroid disease                | 54 | 2.0 | 53  | 3.8 | 3.17E-01 | 3.17E-01 | 4.18E-01 | 4.18E-01 |
| TGF-beta signaling pathway                | 55 | 1.9 | 87  | 2.3 | 5.73E-01 | 5.73E-01 | 4.24E-01 | 4.24E-01 |
| Toll-like receptor signaling pathway      | 56 | 1.9 | 102 | 2.9 | 4.13E-01 | 4.13E-01 | 4.32E-01 | 4.32E-01 |
| ErbB signaling pathway                    | 57 | 1.9 | 87  | 2.3 | 6.05E-01 | 6.05E-01 | 4.34E-01 | 4.34E-01 |
| Cell adhesion molecules (CAMs)            | 58 | 1.9 | 134 | 1.5 | 7.99E-01 | 7.99E-01 | 4.47E-01 | 4.47E-01 |
| Alzheimer"s disease                       | 59 | 1.8 | 178 | 1.7 | 7.24E-01 | 7.24E-01 | 4.50E-01 | 4.50E-01 |
| Mismatch repair                           | 60 | 1.8 | 23  | 4.3 | 4.05E-01 | 4.05E-01 | 4.59E-01 | 4.59E-01 |
| Renal cell carcinoma                      | 61 | 1.8 | 69  | 2.9 | 4.80E-01 | 4.80E-01 | 4.61E-01 | 4.61E-01 |
| Vibrio cholerae infection                 | 62 | 1.8 | 62  | 1.6 | 7.58E-01 | 7.58E-01 | 4.66E-01 | 4.66E-01 |
| Cell cycle                                | 63 | 1.7 | 118 | 2.5 | 4.87E-01 | 4.87E-01 | 5.02E-01 | 5.02E-01 |
| Olfactory transduction                    | 64 | 1.6 | 382 | 0.3 | 9.26E-01 | 9.26E-01 | 5.28E-01 | 5.28E-01 |
| Notch signaling pathway                   | 65 | 1.6 | 47  | 2.1 | 6.70E-01 | 6.70E-01 | 5.36E-01 | 5.36E-01 |
| Asthma                                    | 66 | 1.6 | 30  | 3.3 | 4.71E-01 | 4.71E-01 | 5.38E-01 | 5.38E-01 |
| DNA replication                           | 67 | 1.5 | 36  | 2.8 | 5.62E-01 | 5.62E-01 | 5.63E-01 | 5.63E-01 |
| Huntington"s disease                      | 68 | 1.5 | 189 | 2.1 | 5.67E-01 | 5.67E-01 | 5.63E-01 | 5.63E-01 |
| Adipocytokine signaling pathway           | 69 | 1.5 | 67  | 1.5 | 7.90E-01 | 7.90E-01 | 5.74E-01 | 5.74E-01 |
| Proteasome                                | 70 | 1.5 | 48  | 2.1 | 6.29E-01 | 6.29E-01 | 5.74E-01 | 5.74E-01 |
| Allograft rejection                       | 71 | 1.4 | 38  | 2.6 | 5.41E-01 | 5.41E-01 | 5.85E-01 | 5.85E-01 |
| Type II diabetes mellitus                 | 72 | 1.4 | 45  | 2.2 | 6.20E-01 | 6.20E-01 | 5.88E-01 | 5.88E-01 |
| Graft-versus-host disease                 | 73 | 1.4 | 42  | 2.4 | 5.52E-01 | 5.52E-01 | 5.91E-01 | 5.91E-01 |
| SNARE interactions in vesicular transport | 74 | 1.4 | 38  | 2.6 | 5.83E-01 | 5.83E-01 | 6.00E-01 | 6.00E-01 |
| Nucleotide excision repair                | 75 | 1.4 | 44  | 2.3 | 6.38E-01 | 6.38E-01 | 6.06E-01 | 6.06E-01 |
| Type I diabetes mellitus                  | 76 | 1.3 | 44  | 2.3 | 5.92E-01 | 5.92E-01 | 6.16E-01 | 6.16E-01 |
| Cytokine-cytokine receptor interaction    | 77 | 1.3 | 263 | 1.5 | 8.44E-01 | 8.44E-01 | 6.24E-01 | 6.24E-01 |
| Parkinson"s disease                       | 78 | 1.3 | 137 | 1.5 | 7.48E-01 | 7.48E-01 | 6.36E-01 | 6.36E-01 |
| PPAR signaling pathway                    | 79 | 1.3 | 70  | 1.4 | 7.95E-01 | 7.95E-01 | 6.44E-01 | 6.44E-01 |

|                                         |    |     |     |     |          |          |          |          |
|-----------------------------------------|----|-----|-----|-----|----------|----------|----------|----------|
| p53 signaling pathway                   | 80 | 1.2 | 69  | 1.4 | 7.99E-01 | 7.99E-01 | 6.68E-01 | 6.68E-01 |
| Hematopoietic cell lineage              | 81 | 1.1 | 87  | 1.1 | 8.59E-01 | 8.59E-01 | 6.92E-01 | 6.92E-01 |
| Adherens junction                       | 82 | 1.1 | 78  | 1.3 | 8.34E-01 | 8.34E-01 | 7.05E-01 | 7.05E-01 |
| Neuroactive ligand-receptor interaction | 83 | 1.0 | 256 | 0.8 | 9.82E-01 | 9.82E-01 | 7.48E-01 | 7.48E-01 |

**Table 23** Genes with ChIP-on-CHIP bindings sites (region p-value < 0.05) and siRNA expression values (Note \*significant differentially expressed genes in bold) of the KEGG MAPK signaling pathway

| Gene symbol   | Gene Name                                                                   | ChIP-on-CHIP enriched region |             |                  |          | Expression |             |          |
|---------------|-----------------------------------------------------------------------------|------------------------------|-------------|------------------|----------|------------|-------------|----------|
|               |                                                                             | Chromosome region            | Length(bps) | Probes in region | p-value  | MAT-score  | Fold change | p-value  |
| MAPK11        | mitogen-activated protein kinase 11                                         | chr22:49035213-49036046      | 834         | 24               | 1.85E-03 | 18.40      | -1.27       | 5.42E-02 |
| MAPK12        | mitogen-activated protein kinase 12                                         | chr22:49035213-49036046      | 834         | 24               | 1.85E-03 | 18.40      | -1.04       | 6.87E-01 |
| FLNA          | filamin A, alpha (actin binding protein 280)                                | chrX:153235798-153237011     | 1214        | 33               | 2.29E-03 | 17.64      | -1.33       | 5.78E-02 |
| FGF22         | fibroblast growth factor 22                                                 | chr19:591265-592254          | 990         | 23               | 2.72E-03 | 17.14      | -1.07       | 5.33E-01 |
| MAP3K6        | mitogen-activated protein kinase kinase kinase 6                            | chr1:27576823-27577534       | 712         | 16               | 5.71E-03 | 14.79      | -1.25       | 1.50E-01 |
| CACNA1A       | calcium channel, voltage-dependent, P/Q type, alpha 1A subunit              | chr19:13477805-13478560      | 756         | 18               | 9.86E-03 | 13.13      | -1.17       | 1.44E-01 |
| MAP3K12       | mitogen-activated protein kinase kinase kinase 12                           | chr12:52196249-52197268      | 1020        | 29               | 1.05E-02 | 12.94      | -1.20       | 1.23E-01 |
| CACNG2        | calcium channel, voltage-dependent, gamma subunit 2                         | chr22:35435808-35436315      | 508         | 14               | 1.17E-02 | 12.60      | -1.02       | 8.57E-01 |
| <b>MAP2K3</b> | mitogen-activated protein kinase kinase 3                                   | chr17:21125336-21126121      | 786         | 22               | 1.29E-02 | 12.35      | -1.43       | 1.41E-02 |
| HSPA1L        | heat shock 70kDa protein 1-like                                             | chr6:31873223-31873813       | 591         | 15               | 1.39E-02 | 12.13      | 1.17        | 1.74E-01 |
| IKBKG         | inhibitor of kappa light polypeptide gene enhancer in B-cells, kinase gamma | chrX:153537304-153537888     | 585         | 13               | 1.65E-02 | 11.67      | -1.15       | 1.59E-01 |
| RASGRP2       | RAS guanyl releasing protein 2 (calcium and DAG-regulated)                  | chr11:64235895-64236992      | 1098        | 31               | 1.73E-02 | 11.55      | 1.23        | 2.02E-01 |
| NTRK1         | neurotrophic tyrosine kinase, receptor, type 1                              | chr1:155096881-155097821     | 941         | 24               | 1.75E-02 | 11.51      | -1.01       | 9.34E-01 |
| MKNK2         | MAP kinase interacting serine/threonine kinase 2                            | chr19:2008501-2009234        | 734         | 20               | 1.78E-02 | 11.47      | -1.21       | 1.82E-01 |



|                 |                                                                       |                           |      |    |          |       |       |          |
|-----------------|-----------------------------------------------------------------------|---------------------------|------|----|----------|-------|-------|----------|
| MAPK8IP3        | mitogen-activated protein kinase 8 interacting protein 3              | chr16:1766988-1768014     | 1027 | 28 | 1.84E-02 | 11.40 | -1.10 | 4.64E-01 |
| PTPN7           | protein tyrosine phosphatase, non-receptor type 7                     | chr1:200391831-200392552  | 722  | 18 | 1.90E-02 | 11.28 | 1.03  | 4.91E-01 |
| PDGFB           | platelet-derived growth factor beta polypeptide                       | chr22:37978948-37979686   | 739  | 20 | 1.99E-02 | 11.15 | -1.13 | 3.52E-01 |
| PLA2G2F         | phospholipase A2, group IIF                                           | chr1:20337136-20337759    | 624  | 15 | 2.09E-02 | 11.00 | -1.04 | 5.74E-01 |
| DDIT3           | DNA-damage-inducible transcript 3                                     | chr12:56205980-56206818   | 839  | 24 | 2.23E-02 | 10.79 | 1.07  | 7.96E-01 |
| <b>SMAD4</b>    | SMAD family member 4                                                  | chr18:46825439-46825879   | 441  | 13 | 2.25E-02 | 10.77 | -1.23 | 4.19E-02 |
| <b>CACNA2D2</b> | calcium channel, voltage-dependent, alpha 2/delta subunit 2           | chr3:50349280-50350005    | 726  | 20 | 2.37E-02 | 10.62 | -1.30 | 3.65E-02 |
| JUN             | jun oncogene                                                          | chr1:59020523-59021495    | 973  | 27 | 2.54E-02 | 10.44 | 1.44  | 1.81E-01 |
| <b>MAX</b>      | MYC associated factor X                                               | chr14:64638099-64638744   | 646  | 17 | 2.66E-02 | 10.29 | -1.22 | 4.23E-02 |
| MAPK13          | mitogen-activated protein kinase 13                                   | chr6:36198896-36199646    | 751  | 21 | 2.72E-02 | 10.25 | -1.08 | 3.87E-01 |
| PDGFRB          | platelet-derived growth factor receptor, beta polypeptide             | chr5:149480346-149480990  | 645  | 18 | 2.72E-02 | 10.24 | 1.06  | 5.67E-01 |
| CACNG4          | calcium channel, voltage-dependent, gamma subunit 4                   | chr17:62389856-62390809   | 954  | 27 | 2.77E-02 | 10.19 | 1.05  | 5.84E-01 |
| <b>PRKX</b>     | protein kinase, X-linked                                              | chrX:3643072-3643939      | 868  | 25 | 2.88E-02 | 10.09 | -1.37 | 3.83E-02 |
| MKNK1           | MAP kinase interacting serine/threonine kinase 1                      | chr1:46790394-46791066    | 673  | 19 | 2.91E-02 | 10.05 | -1.07 | 3.16E-01 |
| FGF1            | fibroblast growth factor 1 (acidic)                                   | chr5:141986937-141987647  | 711  | 20 | 2.93E-02 | 10.04 | -1.09 | 1.56E-01 |
| FGF8            | fibroblast growth factor 8 (androgen-induced)                         | chr10:103527007-103527730 | 724  | 20 | 3.01E-02 | 9.96  | -1.01 | 9.39E-01 |
| STMN1           | stathmin 1/oncoprotein 18                                             | chr1:26105057-26105706    | 650  | 18 | 3.38E-02 | 9.65  | -1.22 | 1.22E-01 |
| GNA12           | guanine nucleotide binding protein (G protein) alpha 12               | chr7:2740139-2740820      | 682  | 19 | 3.39E-02 | 9.63  | 1.16  | 2.73E-01 |
| JUND            | jun D proto-oncogene                                                  | chr19:18256743-18257344   | 602  | 15 | 3.42E-02 | 9.61  | 1.17  | 2.68E-01 |
| TGFB3           | transforming growth factor, beta 3                                    | chr14:75517201-75517968   | 768  | 21 | 3.47E-02 | 9.56  | 1.04  | 3.71E-01 |
| <b>AKT2</b>     | v-akt murine thymoma viral oncogene homolog 2                         | chr19:45477316-45477991   | 676  | 17 | 3.55E-02 | 9.50  | -1.66 | 6.57E-03 |
| CACNB4          | calcium channel, voltage-dependent, beta 4 subunit                    | chr2:152664408-152665082  | 675  | 19 | 3.57E-02 | 9.49  | -1.02 | 7.96E-01 |
| PTPN5           | protein tyrosine phosphatase, non-receptor type 5 (striatum-enriched) | chr11:18706089-18706805   | 717  | 20 | 3.66E-02 | 9.43  | 1.09  | 4.36E-01 |
| FGF14           | fibroblast growth factor 14                                           | chr13:101850962-101851659 | 698  | 19 | 3.76E-02 | 9.36  | 1.01  | 7.32E-01 |
| CACNA11         | calcium channel, voltage-dependent, T type, alpha 11 subunit          | chr22:38294186-38294777   | 592  | 17 | 3.90E-02 | 9.26  | -1.13 | 1.81E-01 |

|               |                                                                                   |                          |     |    |          |      |       |          |
|---------------|-----------------------------------------------------------------------------------|--------------------------|-----|----|----------|------|-------|----------|
| PTPRR         | protein tyrosine phosphatase, receptor type, R                                    | chr12:69604288-69605016  | 729 | 21 | 3.92E-02 | 9.25 | -1.05 | 7.42E-01 |
| FGFR4         | fibroblast growth factor receptor 4                                               | chr5:176448835-176449531 | 697 | 16 | 3.94E-02 | 9.24 | 1.01  | 7.60E-01 |
| <b>MRAS</b>   | muscle RAS oncogene homolog                                                       | chr3:139568666-139569273 | 608 | 12 | 3.98E-02 | 9.22 | -1.13 | 4.60E-02 |
| CACNA1B       | calcium channel, voltage-dependent, N type, alpha 1B subunit                      | chr9:139888580-139889214 | 635 | 18 | 4.00E-02 | 9.20 | -1.11 | 1.48E-01 |
| MAP2K2        | mitogen-activated protein kinase kinase 2                                         | chr7:128551685-128552287 | 603 | 17 | 4.13E-02 | 9.12 | -1.19 | 1.04E-01 |
| DUSP2         | dual specificity phosphatase 2                                                    | chr2:96178127-96178804   | 678 | 16 | 4.14E-02 | 9.11 | 1.48  | 1.64E-01 |
| FGF11         | fibroblast growth factor 11                                                       | chr17:7260904-7261636    | 733 | 22 | 4.21E-02 | 9.06 | -1.17 | 1.08E-01 |
| TAOK2         | TAO kinase 2                                                                      | chr16:29909731-29910337  | 607 | 17 | 4.46E-02 | 8.91 | -1.11 | 5.15E-01 |
| NFATC4        | nuclear factor of activated T-cells, cytoplasmic, calcineurin-dependent 4         | chr14:23906236-23906838  | 603 | 16 | 4.52E-02 | 8.86 | -1.09 | 4.20E-01 |
| HSPA1B        | heat shock 70kDa protein 1B                                                       | chr6:31904789-31905394   | 606 | 17 | 4.72E-02 | 8.75 | 1.13  | 2.54E-01 |
| <b>ELK1</b>   | ELK1, member of ETS oncogene family                                               | chrX:47379659-47380243   | 585 | 14 | 4.84E-02 | 8.68 | -1.23 | 3.72E-02 |
| HRAS          | v-Ha-ras Harvey rat sarcoma viral oncogene homolog                                | chr11:530259-530861      | 603 | 17 | 4.86E-02 | 8.67 | -1.14 | 4.43E-01 |
| <b>SRF</b>    | serum response factor (c-fos serum response element-binding transcription factor) | chr6:43254307-43254904   | 598 | 17 | 4.91E-02 | 8.65 | -1.35 | 1.22E-02 |
| <b>PPP3CB</b> | protein phosphatase 3 (formerly 2B), catalytic subunit, beta isoform              | chr10:74861293-74861781  | 489 | 14 | 4.98E-02 | 8.61 | -1.15 | 1.05E-03 |

**Table 24** Quantitative real-time PCR validation of genes with CHIP-on-CHIP bindings sites (region p-value < 0.05) and significant HEK & HeLa siRNA expression values and additional expression of patient versus 4 control lymphoblastoid cell lines values (note significant differential fold changes in bold) of the KEGG MAPK signaling pathway. (NTRK1 and DUSP2 were included as negative controls)

| Gene symbol | Whole genome expression array<br>HEK & HeLa siRNA<br>expression |          | Quantitative real-time PCR validation<br>HEK & HeLa siRNA<br>expression |          | Whole genome expression array<br>patient vs. controls<br>expression |          |
|-------------|-----------------------------------------------------------------|----------|-------------------------------------------------------------------------|----------|---------------------------------------------------------------------|----------|
|             | Fold change                                                     | p-value  | Fold change                                                             | p-value  | Fold change                                                         | p-value  |
| MAP2K3      | <b>-1.43</b>                                                    | 1.41E-02 | <b>-1.81</b>                                                            | 1.23E-14 | <b>-1.26</b>                                                        | 2.41E-02 |
| NTRK1       | -1.01                                                           | 9.34E-01 | -0.68                                                                   | 1.03E-01 | 1.05                                                                | 4.29E-01 |
| SMAD4       | <b>-1.23</b>                                                    | 4.19E-02 | <b>-1.49</b>                                                            | 1.02E-03 | <b>-1.19</b>                                                        | 3.21E-04 |
| MAX         | <b>-1.22</b>                                                    | 4.23E-02 | <b>-1.51</b>                                                            | 1.93E-04 | <b>-1.45</b>                                                        | 6.65E-03 |
| PRKX        | <b>-1.37</b>                                                    | 3.83E-02 | <b>-1.49</b>                                                            | 1.77E-04 | <b>-1.7</b>                                                         | 1.33E-02 |
| AKT2        | <b>-1.66</b>                                                    | 6.57E-03 | <b>-1.34</b>                                                            | 6.64E-05 | <b>-1.48</b>                                                        | 2.18E-02 |
| MRAS        | <b>-1.13</b>                                                    | 4.60E-02 | <b>-1.42</b>                                                            | 4.86E-05 | <b>-1.15</b>                                                        | 7.88E-06 |
| DUSP2       | 1.48                                                            | 1.64E-01 | -1.01                                                                   | 9.58E-01 | -1.7                                                                | 4.42E-01 |
| ELK1        | <b>-1.23</b>                                                    | 3.72E-02 | <b>-1.47</b>                                                            | 2.79E-04 | <b>-1.11</b>                                                        | 3.23E-02 |
| SRF         | <b>-1.35</b>                                                    | 1.22E-02 | <b>-1.60</b>                                                            | 7.35E-06 | <b>-1.14</b>                                                        | 2.50E-04 |
| PPP3CB      | <b>-1.15</b>                                                    | 1.05E-03 | -1.30                                                                   | 2.07E-01 | <b>-1.15</b>                                                        | 1.05E-03 |

**Table 25** Tissue expression pattern of significantly enriched genes (p-value < 0.05) with CHIP-on-CHIP binding sites (MAT score p-value < =.05)

| <b>Uniprot-Term</b> | <b>Observed genes</b> | <b>%</b> | <b>p-value*</b> | <b>Benjamini*</b> |
|---------------------|-----------------------|----------|-----------------|-------------------|
| Brain               | 30                    | 45.5     | 7.00E-04        | 4.09E-01          |
| Muscle              | 7                     | 10.6     | 1.02E-02        | 9.79E-01          |
| Lymphocyte          | 3                     | 4.5      | 1.83E-02        | 9.90E-01          |
| Spleen              | 7                     | 10.6     | 2.09E-02        | 9.81E-01          |
| Fetal brain         | 6                     | 9.1      | 2.63E-02        | 9.82E-01          |
| Epithelium          | 11                    | 16.7     | 2.98E-02        | 9.77E-01          |

\*p-values and Benjamini-Hochberg p-values were calculated using the DAVID functional annotation of Uniprot tissue expression
